# Supplementary material for: Methylome and Transcriptome-Based Integration Analysis Identified Molecular Signatures Associated With Meningitis Induced by Glaesserella parasuis
Source: Frontiers journal article supplement (doi:10.3389/fimmu.2022.840399), 2022-02-25
Supplement: Data_Sheet_7.xls [file Data_Sheet_7.xls]

## Sheet: reverse_sample_Infection_vs_Con
Supplementary file 7. Differentially methylated CpGs that were inversely correlated with the expression of mRNAs.
Chromosome	Start	End.x	C2	C3	H3	H2	H1	C1	GeneID	diff.x	diff.se.x	gene_name	Group2	Group1	log2FC	Pvalue	color	X	mu1	mu2	diff.y	diff.se.y	stat	phi1	phi2	pval	fdr	End.y	Annotation	Distance.to.TSS	Nearest.PromoterID	Genename	Description
chr10	14889700	14889701	1	0.7333	0.7	1	0.7857	0.3684	ENSSSCG00000025686	0.155897	0.124565	KMO	1.08373	3.65877	-1.75535	2.95e-17	four	2012034	0.572459	0.416563	0.155897	0.124565	1.25153	0.169727	0.0376109	0.210741	0.770569	14889701	promoter-TSS (ENSSSCT00000032127)	-241	ENSSSCT00000032127	KMO	kynurenine 3-monooxygenase
chr1	124619830	124619831	0.9273	0.7273	1	0.4737	0.6667	0	ENSSSCG00000004586	0.138463	0.0478892	FAM81A	34.8145	51.0948	-0.553487	3.14e-14	four	759624	0.383368	0.244905	0.138463	0.0478892	2.89131	0.0746312	0.167268	0.00383638	0.0892853	124619831	promoter-TSS (ENSSSCT00000005065)	-831	ENSSSCT00000005065	FAM81A
chr1	124619860	124619861	0.6	0.6667	0.8667	0.7544	1	0.6154	ENSSSCG00000004586	0.138463	0.0483524	FAM81A	34.8145	51.0948	-0.553487	3.14e-14	four	759625	0.383368	0.244905	0.138463	0.0483524	2.86361	0.0746312	0.142225	0.0041884	0.0947543	124619861	promoter-TSS (ENSSSCT00000005065)	-861	ENSSSCT00000005065	FAM81A
chr1	137599775	137599776	0.7812	0.6829	0.75	1	0.5	0.9	ENSSSCG00000004659	0.212035	0.102952	SLC12A1	0.496192	0.974008	-0.973035	0.000128883	four	824509	0.915881	0.703846	0.212035	0.102952	2.05954	0.0606984	0.0864324	0.0394425	0.37365	137599776	promoter-TSS (ENSSSCT00000005145)	-41	ENSSSCT00000005145	SLC12A1
chr1	137599961	137599962	0.875	0.8571	0.8261	1	0	0.5	ENSSSCG00000004659	0.27698	0.0731405	SLC12A1	0.496192	0.974008	-0.973035	0.000128883	four	824510	0.918569	0.641589	0.27698	0.0731405	3.78696	0.0586991	0.0614176	0.000152502	0.00856645	137599962	promoter-TSS (ENSSSCT00000005145)	-227	ENSSSCT00000005145	SLC12A1
chr1	137599962	137599963	0.8103	0.6923	0.4545	1	0.6364	0.5	ENSSSCG00000004659	0.27698	0.0793442	SLC12A1	0.496192	0.974008	-0.973035	0.000128883	four	824511	0.918569	0.641589	0.27698	0.0793442	3.49087	0.0746312	0.127745	0.000481453	0.0203748	137599963	promoter-TSS (ENSSSCT00000005145)	-228	ENSSSCT00000005145	SLC12A1
chr1	144618190	144618191	0.963	0.7742	0.8182	1	1	1	ENSSSCG00000004736	0.166197	0.102576	SPTBN5	0.00902788	0.0391565	-2.11679	0.0385822	four	861026	0.926403	0.760207	0.166197	0.102576	1.62023	0.0995403	0.307993	0.105183	0.597242	144618191	promoter-TSS (ENSSSCT00000005232)	-81	ENSSSCT00000005232	SPTBN5
chr1	144618256	144618257	0.9062	0.8667	0.9167	0.45	1	0.4667	ENSSSCG00000004736	0.348894	0.143613	SPTBN5	0.00902788	0.0391565	-2.11679	0.0385822	four	861027	0.969646	0.620752	0.348894	0.143613	2.4294	0.0746312	0.0996154	0.0151237	0.2162	144618257	promoter-TSS (ENSSSCT00000005232)	-147	ENSSSCT00000005232	SPTBN5
chr1	158740759	158740760	0.8333	0.7895	1	0.7895	0.8571	0.2308	ENSSSCG00000004839	0.167537	0.133038	CHRFAM7A	5.10554	8.03361	-0.653986	1.53e-08	four	942075	0.657796	0.490259	0.167537	0.133038	1.25932	0.059176	0.069358	0.207915	0.767356	158740760	promoter-TSS (ENSSSCT00000005341)	-314	ENSSSCT00000005341
chr1	158740854	158740855	0.5	0.7143	0.8462	1	0.8	0.5833	ENSSSCG00000004839	0.167537	0.13101	CHRFAM7A	5.10554	8.03361	-0.653986	1.53e-08	four	942076	0.657796	0.490259	0.167537	0.13101	1.27881	0.0619711	0.0533799	0.200963	0.75902	158740855	promoter-TSS (ENSSSCT00000005341)	-409	ENSSSCT00000005341
chr1	169326960	169326961	0.7857	0.7619	0.5455	1	0.8974	0.5556	ENSSSCG00000004880	0.118217	0.0684207	CD226	0.863653	2.38709	-1.46673	0.000711845	four	1004407	0.802178	0.683961	0.118217	0.0684207	1.72779	0.181914	0.0549963	0.084025	0.541932	169326961	promoter-TSS (ENSSSCT00000005386)	11	ENSSSCT00000005386	CD226
chr1	169326974	169326975	1	0.8947	0.4	0.8333	0.4545	0	ENSSSCG00000004880	0.118217	0.0613071	CD226	0.863653	2.38709	-1.46673	0.000711845	four	1004408	0.802178	0.683961	0.118217	0.0613071	1.92827	0.0623746	0.374801	0.0538212	0.438521	169326975	promoter-TSS (ENSSSCT00000005386)	25	ENSSSCT00000005386	CD226
chr11	7260754	7260755	1	1	1	0	1	0.6667	ENSSSCG00000009330	0.111575	0.0662766	ALOX5AP	9.02866	12.8003	-0.503589	0.00339275	four	2772509	0.778312	0.666736	0.111575	0.0662766	1.68347	0.0445039	0.0409552	0.0922833	0.564801	7260755	promoter-TSS (ENSSSCT00000010224)	-365	ENSSSCT00000010224	ALOX5AP
chr11	7260773	7260774	1	0.9	0.8571	0	1	0.4706	ENSSSCG00000009330	0.111575	0.0632097	ALOX5AP	9.02866	12.8003	-0.503589	0.00339275	four	2772510	0.778312	0.666736	0.111575	0.0632097	1.76516	0.0611395	0.0494826	0.0775373	0.522603	7260774	promoter-TSS (ENSSSCT00000010224)	-346	ENSSSCT00000010224	ALOX5AP
chr1	179771832	179771833	0.8824	0.8947	0.8333	1	0	0.3333	ENSSSCG00000004918	0.166724	0.0803232	ALPK2	0.570576	0.898654	-0.655346	0.00570346	four	1054906	0.597491	0.430766	0.166724	0.0803232	2.07567	0.989475	0.20691	0.0379246	0.36592	179771833	promoter-TSS (ENSSSCT00000005427)	-234	ENSSSCT00000005427	ALPK2
chr1	179771870	179771871	1	0.875	0.8667	0.8	0	0.6154	ENSSSCG00000004918	0.166724	0.0879662	ALPK2	0.570576	0.898654	-0.655346	0.00570346	four	1054907	0.597491	0.430766	0.166724	0.0879662	1.89532	0.276952	0.0803194	0.0580497	0.455265	179771871	promoter-TSS (ENSSSCT00000005427)	-196	ENSSSCT00000005427	ALPK2
chr12	1149362	1149363	0.875	0.5714	0.7143	1	0.1333	0.8	ENSSSCG00000026155	0.246703	0.119683	FSCN2	0.0551281	0.28415	-2.36579	0.0352702	four	3374428	0.801648	0.554945	0.246703	0.119683	2.0613	0.0753619	0.0856315	0.0392745	0.372795	1149363	promoter-TSS (ENSSSCT00000024097)	-193	ENSSSCT00000024097	FSCN2
chr12	1149476	1149477	0.8571	0.3	0.7	1	0	0.7273	ENSSSCG00000026155	0.235719	0.0604088	FSCN2	0.0551281	0.28415	-2.36579	0.0352702	four	3374440	0.800917	0.565198	0.235719	0.0604088	3.90206	0.0746312	0.084043	9.54e-05	0.00597454	1149477	promoter-TSS (ENSSSCT00000024097)	-307	ENSSSCT00000024097	FSCN2
chr12	1149491	1149492	0.7895	0.6471	0.9	0.8182	0.1538	1	ENSSSCG00000026155	0.235719	0.0505857	FSCN2	0.0551281	0.28415	-2.36579	0.0352702	four	3374441	0.800917	0.565198	0.235719	0.0505857	4.65979	0.0746312	0.309248	3.17e-06	0.00039735	1149492	promoter-TSS (ENSSSCT00000024097)	-322	ENSSSCT00000024097	FSCN2
chr12	1149507	1149508	0.9444	0.8462	1	0.8	0	0.6364	ENSSSCG00000026155	0.235719	0.0591681	FSCN2	0.0551281	0.28415	-2.36579	0.0352702	four	3374442	0.800917	0.565198	0.235719	0.0591681	3.98389	0.0746312	0.113513	6.78e-05	0.00458766	1149508	promoter-TSS (ENSSSCT00000024097)	-338	ENSSSCT00000024097	FSCN2
chr12	1149517	1149518	1	0.9091	0.875	1	0.9091	0.8182	ENSSSCG00000026155	0.235719	0.0609599	FSCN2	0.0551281	0.28415	-2.36579	0.0352702	four	3374443	0.800917	0.565198	0.235719	0.0609599	3.86678	0.0746312	0.0747699	0.000110281	0.00668285	1149518	promoter-TSS (ENSSSCT00000024097)	-348	ENSSSCT00000024097	FSCN2
chr12	1149524	1149525	0.6364	0.7083	1	0.8333	0.5455	0.8	ENSSSCG00000026155	0.235719	0.0606371	FSCN2	0.0551281	0.28415	-2.36579	0.0352702	four	3374444	0.800917	0.565198	0.235719	0.0606371	3.88737	0.0746312	0.0684947	0.000101336	0.00626178	1149525	promoter-TSS (ENSSSCT00000024097)	-355	ENSSSCT00000024097	FSCN2
chr12	1149528	1149529	0.913	0.9091	0.6923	0.6667	0.7273	0.6	ENSSSCG00000026155	0.223578	0.0581353	FSCN2	0.0551281	0.28415	-2.36579	0.0352702	four	3374445	0.800212	0.576634	0.223578	0.0581353	3.84582	0.0746312	0.0519289	0.00012015	0.00713891	1149529	promoter-TSS (ENSSSCT00000024097)	-359	ENSSSCT00000024097	FSCN2
chr12	20938326	20938327	0.9429	0.9636	0.0769	0.75	1	0	ENSSSCG00000017416	0.127967	0.106426	DHX58	0.840829	1.82091	-1.11478	1.91e-08	four	3628864	0.358974	0.231007	0.127967	0.106426	1.2024	0.131218	0.243459	0.229207	0.790593	20938327	promoter-TSS (ENSSSCT00000035155)	62	ENSSSCT00000035155	DHX58	ATP-dependent RNA helicase DHX58
chr12	26288382	26288383	0.875	0.8919	1	0.4	0.7647	0.8	ENSSSCG00000017578	0.271299	0.0922902	ITGA3	0.837075	1.2476	-0.575724	0.000902646	four	3694237	0.814378	0.54308	0.271299	0.0922902	2.93963	0.345216	0.259617	0.00328609	0.0803296	26288383	promoter-TSS (ENSSSCT00000034965)	-626	ENSSSCT00000032711	ITGA3	integrin alpha 3
chr12	26288395	26288396	1	0.898	1	0.7647	0.2941	0.4615	ENSSSCG00000017578	0.298979	0.0840613	ITGA3	0.837075	1.2476	-0.575724	0.000902646	four	3694238	0.798824	0.499845	0.298979	0.0840613	3.55667	0.630468	0.496894	0.000375582	0.0169431	26288396	promoter-TSS (ENSSSCT00000034965)	-613	ENSSSCT00000032711	ITGA3	integrin alpha 3
chr12	26288401	26288402	0.8462	0.9231	1	0.9167	0.2632	0.4545	ENSSSCG00000017578	0.298979	0.0834968	ITGA3	0.837075	1.2476	-0.575724	0.000902646	four	3694239	0.798824	0.499845	0.298979	0.0834968	3.58072	0.628451	0.507087	0.000342649	0.0158168	26288402	promoter-TSS (ENSSSCT00000034965)	-607	ENSSSCT00000032711	ITGA3	integrin alpha 3
chr12	26288428	26288429	1	1	1	0.75	0.3684	0.6667	ENSSSCG00000017578	0.304276	0.14154	ITGA3	0.837075	1.2476	-0.575724	0.000902646	four	3694240	0.807905	0.50363	0.304276	0.14154	2.14975	0.0528395	0.164072	0.031575	0.331234	26288429	promoter-TSS (ENSSSCT00000034965)	-580	ENSSSCT00000032711	ITGA3	integrin alpha 3
chr12	26288445	26288446	1	0.8889	0.9474	0.4615	0.2308	0.2857	ENSSSCG00000017578	0.304276	0.108265	ITGA3	0.837075	1.2476	-0.575724	0.000902646	four	3694241	0.807905	0.50363	0.304276	0.108265	2.81047	0.398796	0.266709	0.00494686	0.105957	26288446	promoter-TSS (ENSSSCT00000034965)	-563	ENSSSCT00000032711	ITGA3	integrin alpha 3
chr12	26288639	26288640	0.8462	0.6154	1	0.8261	0.8571	0.6	ENSSSCG00000017578	0.334315	0.0803545	ITGA3	0.837075	1.2476	-0.575724	0.000902646	four	3694242	0.778462	0.444146	0.334315	0.0803545	4.16051	0.189865	0.0852215	3.18e-05	0.00253149	26288640	promoter-TSS (ENSSSCT00000034965)	-369	ENSSSCT00000032711	ITGA3	integrin alpha 3
chr12	26288708	26288709	0.7143	0.6923	0.85	0.75	0.8333	0.2727	ENSSSCG00000017578	0.263974	0.161419	ITGA3	0.837075	1.2476	-0.575724	0.000902646	four	3694244	0.826436	0.562462	0.263974	0.161419	1.63533	0.548364	0.301027	0.10198	0.589473	26288709	promoter-TSS (ENSSSCT00000034965)	-300	ENSSSCT00000032711	ITGA3	integrin alpha 3
chr1	229005821	229005822	0.8182	0.92	0.8182	0.2941	0.9677	0.5	ENSSSCG00000005177	0.171906	0.111514	SH3GL2	68.3787	112.629	-0.719959	4.18e-38	four	1285772	0.694261	0.522355	0.171906	0.111514	1.54156	0.0635823	0.0841025	0.123181	0.636987	229005822	promoter-TSS (ENSSSCT00000005707)	-659	ENSSSCT00000005707	SH3GL2
chr12	41218010	41218011	1	0.88	0.75	0.6235	0.6667	0	ENSSSCG00000017705	0.134577	0.107954	CCL5	0.678905	0.976942	-0.525063	0.0224509	four	3802849	0.416802	0.282225	0.134577	0.107954	1.24661	0.0746312	0.158087	0.21254	0.772616	41218011	promoter-TSS (ENSSSCT00000033821)	-58	ENSSSCT00000033821	CCL5	C-C motif chemokine 5
chr12	41218052	41218053	1	0.619	0.5625	0.9091	0.5455	0.5333	ENSSSCG00000017705	0.134577	0.112451	CCL5	0.678905	0.976942	-0.525063	0.0224509	four	3802851	0.416802	0.282225	0.134577	0.112451	1.19676	0.0746312	0.089747	0.231402	0.792777	41218053	promoter-TSS (ENSSSCT00000033821)	-16	ENSSSCT00000033821	CCL5	C-C motif chemokine 5
chr12	41218076	41218077	1	0.9	1	0.8846	0.2727	0.1667	ENSSSCG00000017705	0.134577	0.121712	CCL5	0.678905	0.976942	-0.525063	0.0224509	four	3802852	0.416802	0.282225	0.134577	0.121712	1.1057	0.0746312	0.0717078	0.268855	0.826772	41218077	promoter-TSS (ENSSSCT00000033821)	8	ENSSSCT00000033821	CCL5	C-C motif chemokine 5
chr12	41218101	41218102	1	0.8	1	0.7778	0	0.1818	ENSSSCG00000017705	0.134577	0.123707	CCL5	0.678905	0.976942	-0.525063	0.0224509	four	3802853	0.416802	0.282225	0.134577	0.123707	1.08787	0.0746312	0.0607905	0.276653	0.833002	41218102	promoter-TSS (ENSSSCT00000033821)	33	ENSSSCT00000033821	CCL5	C-C motif chemokine 5
chr12	41218109	41218110	0.8182	0.9048	0.8824	0.6429	0	0.3	ENSSSCG00000017705	0.134577	0.122983	CCL5	0.678905	0.976942	-0.525063	0.0224509	four	3802854	0.416802	0.282225	0.134577	0.122983	1.09427	0.0746312	0.050835	0.273838	0.830818	41218110	promoter-TSS (ENSSSCT00000033821)	41	ENSSSCT00000033821	CCL5	C-C motif chemokine 5
chr1	25289252	25289253	0.84	0.9091	0.8667	0.9487	0.9167	0.9	ENSSSCG00000004139	0.172841	0.0500839	ADGRG6	3.3358	5.00857	-0.586368	2e-05	four	239389	0.797504	0.624663	0.172841	0.0500839	3.45104	0.0872459	0.289873	0.000558436	0.0227249	25289253	promoter-TSS (ENSSSCT00000004574)	-954	ENSSSCT00000004574	GPR126
chr1	25289313	25289314	0.875	0.9286	0.8333	1	1	0.6	ENSSSCG00000004139	0.172841	0.0776472	ADGRG6	3.3358	5.00857	-0.586368	2e-05	four	239391	0.797504	0.624663	0.172841	0.0776472	2.22598	0.0728544	0.0683415	0.0260153	0.297305	25289314	promoter-TSS (ENSSSCT00000004574)	-893	ENSSSCT00000004574	GPR126
chr1	25289412	25289413	0.9545	0.8462	0.8333	0.7333	1	0.6429	ENSSSCG00000004139	0.159488	0.0773788	ADGRG6	3.3358	5.00857	-0.586368	2e-05	four	239392	0.77856	0.619072	0.159488	0.0773788	2.06113	0.059969	0.105195	0.0392903	0.372876	25289413	promoter-TSS (ENSSSCT00000004574)	-794	ENSSSCT00000004574	GPR126
chr1	25289438	25289439	1	0.9643	1	1	0.9231	0.8125	ENSSSCG00000004139	0.159488	0.0715922	ADGRG6	3.3358	5.00857	-0.586368	2e-05	four	239393	0.77856	0.619072	0.159488	0.0715922	2.22773	0.0499851	0.169521	0.0258987	0.296567	25289439	promoter-TSS (ENSSSCT00000004574)	-768	ENSSSCT00000004574	GPR126
chr1	25289458	25289459	0.8148	0.8788	1	1	1	0.3636	ENSSSCG00000004139	0.16348	0.0694153	ADGRG6	3.3358	5.00857	-0.586368	2e-05	four	239394	0.680166	0.516686	0.16348	0.0694153	2.3551	0.160344	0.0485478	0.0185176	0.244135	25289459	promoter-TSS (ENSSSCT00000004574)	-748	ENSSSCT00000004574	GPR126
chr1	25289494	25289495	0.9091	1	1	0.8182	0.7333	0.6	ENSSSCG00000004139	0.107133	0.0190342	ADGRG6	3.3358	5.00857	-0.586368	2e-05	four	239397	0.34763	0.240497	0.107133	0.0190342	5.62846	0.450862	0.18382	1.82e-08	5.38e-06	25289495	promoter-TSS (ENSSSCT00000004574)	-712	ENSSSCT00000004574	GPR126
chr12	55299549	55299550	0.875	0.3333	1	1	0	0.0909	ENSSSCG00000017956	0.171352	0.189256	CD68	1.19241	2.35525	-0.982	0.000809298	four	3956344	0.484113	0.312761	0.171352	0.189256	0.905402	0.089619	0.076215	0.365252	0.888744	55299550	promoter-TSS (ENSSSCT00000032904)	-26	ENSSSCT00000019540	CD68
chr1	297402935	297402936	0.8333	0.9231	0.8667	0.5455	0.6429	0.4571	ENSSSCG00000005581	0.1368	0.0762638	GPR21	19.8571	28.7064	-0.53172	1.09e-06	four	1649446	0.571258	0.434458	0.1368	0.0762638	1.79377	0.0801319	0.0308217	0.0728495	0.507758	297402936	promoter-TSS (ENSSSCT00000006134)	-813	ENSSSCT00000006134	GPR21
chr1	297402963	297402964	1	0.875	0.8462	0.8636	0.7097	0.3	ENSSSCG00000005581	0.142573	0.0724089	GPR21	19.8571	28.7064	-0.53172	1.09e-06	four	1649448	0.563143	0.42057	0.142573	0.0724089	1.969	0.0445714	0.0603218	0.0489533	0.418065	297402964	promoter-TSS (ENSSSCT00000006134)	-841	ENSSSCT00000006134	GPR21
chr1	297402979	297402980	1	1	0.8	0.65	0.8095	0.1429	ENSSSCG00000005581	0.142573	0.0614593	GPR21	19.8571	28.7064	-0.53172	1.09e-06	four	1649450	0.563143	0.42057	0.142573	0.0614593	2.3198	0.0442969	0.066932	0.0203519	0.258108	297402980	promoter-TSS (ENSSSCT00000006134)	-857	ENSSSCT00000006134	GPR21
chr1	297403030	297403031	1	0.9	0.8571	0.9459	0.7209	0.1429	ENSSSCG00000005581	0.139683	0.0434109	GPR21	19.8571	28.7064	-0.53172	1.09e-06	four	1649451	0.547851	0.408168	0.139683	0.0434109	3.2177	0.416695	0.19663	0.00129225	0.0417899	297403031	promoter-TSS (ENSSSCT00000006134)	-908	ENSSSCT00000006134	GPR21
chr1	297403119	297403120	0.64	0.9	1	0.8933	0.8421	0.45	ENSSSCG00000005581	0.134333	0.0635066	GPR21	19.8571	28.7064	-0.53172	1.09e-06	four	1649452	0.543734	0.409401	0.134333	0.0635066	2.11526	0.0917703	0.112303	0.0344076	0.347188	297403120	promoter-TSS (ENSSSCT00000006134)	-997	ENSSSCT00000006134	GPR21
chr1	297715284	297715285	0.8	0.725	1	0.7273	0.881	0.9444	ENSSSCG00000005582	0.186718	0.106289	STRBP	63.118	90.8315	-0.52514	5.53e-15	four	1650412	0.679509	0.492791	0.186718	0.106289	1.7567	0.0937477	0.246353	0.0789697	0.526965	297715285	promoter-TSS (ENSSSCT00000006135)	-824	ENSSSCT00000006135	STRBP
chr1	303257921	303257922	0.95	0	0.1	0.5	0.7391	0.4167	ENSSSCG00000005665	0.265972	0.0722848	PHYHD1	3.07154	6.70892	-1.12712	3.19e-08	four	1718559	0.735335	0.469362	0.265972	0.0722848	3.67951	0.0746312	0.0580408	0.000233684	0.0118584	303257922	promoter-TSS (ENSSSCT00000006228)	-903	ENSSSCT00000006228	PHYHD1
chr1	303257990	303257991	0.9444	0.9565	0.6341	0.8	0.913	0.4615	ENSSSCG00000005665	0.176701	0.13316	PHYHD1	3.07154	6.70892	-1.12712	3.19e-08	four	1718560	0.734339	0.557638	0.176701	0.13316	1.32698	0.0580625	0.203263	0.184514	0.738103	303257991	promoter-TSS (ENSSSCT00000006228)	-834	ENSSSCT00000006228	PHYHD1
chr1	304185436	304185437	0.8947	1	1	0.88	0	0.9444	ENSSSCG00000005698	0.110812	0.0824384	NCS1	151.549	234.307	-0.628619	2.33e-20	four	1732206	0.813236	0.702425	0.110812	0.0824384	1.34417	0.0757319	0.0949015	0.178892	0.730487	304185437	promoter-TSS (ENSSSCT00000006267)	-640	ENSSSCT00000006267	NCS1
chr1	304185461	304185462	1	0.5455	0.8	0.7692	0	0.8571	ENSSSCG00000005698	0.124453	0.073655	NCS1	151.549	234.307	-0.628619	2.33e-20	four	1732207	0.820427	0.695974	0.124453	0.073655	1.68967	0.100565	0.193907	0.0910902	0.561631	304185462	promoter-TSS (ENSSSCT00000006267)	-615	ENSSSCT00000006267	NCS1
chr1	304185499	304185500	0.95	0.8	0.8667	0.8148	0	0.8636	ENSSSCG00000005698	0.125012	0.0657863	NCS1	151.549	234.307	-0.628619	2.33e-20	four	1732208	0.805945	0.680933	0.125012	0.0657863	1.90027	0.144527	0.0887425	0.0573981	0.452749	304185500	promoter-TSS (ENSSSCT00000006267)	-577	ENSSSCT00000006267	NCS1
chr1	304185512	304185513	0.9	0.5	0.8333	0	0	0.7222	ENSSSCG00000005698	0.137327	0.0688703	NCS1	151.549	234.307	-0.628619	2.33e-20	four	1732209	0.81795	0.680623	0.137327	0.0688703	1.99399	0.179411	0.0548951	0.0461531	0.405618	304185513	promoter-TSS (ENSSSCT00000006267)	-564	ENSSSCT00000006267	NCS1
chr1	304185526	304185527	1	0.6364	0.8462	0.9375	0	0.1765	ENSSSCG00000005698	0.14287	0.0573063	NCS1	151.549	234.307	-0.628619	2.33e-20	four	1732210	0.800427	0.657557	0.14287	0.0573063	2.49309	0.213808	0.17048	0.0126635	0.194025	304185527	promoter-TSS (ENSSSCT00000006267)	-550	ENSSSCT00000006267	NCS1
chr1	304185579	304185580	0.9747	0.8182	1	1	0	0.8182	ENSSSCG00000005698	0.145955	0.0492957	NCS1	151.549	234.307	-0.628619	2.33e-20	four	1732211	0.800222	0.654267	0.145955	0.0492957	2.96081	0.181877	0.095441	0.00306831	0.0766379	304185580	promoter-TSS (ENSSSCT00000006267)	-497	ENSSSCT00000006267	NCS1
chr1	304185591	304185592	0.6	0.75	0.6667	1	0	0.4545	ENSSSCG00000005698	0.145955	0.0489264	NCS1	151.549	234.307	-0.628619	2.33e-20	four	1732212	0.800222	0.654267	0.145955	0.0489264	2.98316	0.266693	0.0797646	0.00285289	0.0728923	304185592	promoter-TSS (ENSSSCT00000006267)	-485	ENSSSCT00000006267	NCS1
chr1	304185695	304185696	0.8286	0.625	1	1	0	0.8	ENSSSCG00000005698	0.138364	0.0451428	NCS1	151.549	234.307	-0.628619	2.33e-20	four	1732213	0.773856	0.635492	0.138364	0.0451428	3.06503	0.084345	0.0718193	0.00217646	0.060413	304185696	promoter-TSS (ENSSSCT00000006267)	-381	ENSSSCT00000006267	NCS1
chr1	304185738	304185739	1	0.8	1	1	0	0.6471	ENSSSCG00000005698	0.154961	0.072269	NCS1	151.549	234.307	-0.628619	2.33e-20	four	1732214	0.778448	0.623487	0.154961	0.072269	2.14422	0.102481	0.0564233	0.0320152	0.333775	304185739	promoter-TSS (ENSSSCT00000006267)	-338	ENSSSCT00000006267	NCS1
chr1	304185742	304185743	0.9524	1	1	1	0.1333	0.625	ENSSSCG00000005698	0.154961	0.048196	NCS1	151.549	234.307	-0.628619	2.33e-20	four	1732215	0.778448	0.623487	0.154961	0.048196	3.21522	0.17762	0.0558107	0.00130343	0.0420494	304185743	promoter-TSS (ENSSSCT00000006267)	-334	ENSSSCT00000006267	NCS1
chr1	304185752	304185753	0.5455	1	1	1	0	0.6667	ENSSSCG00000005698	0.160257	0.069403	NCS1	151.549	234.307	-0.628619	2.33e-20	four	1732216	0.771429	0.611172	0.160257	0.069403	2.30908	0.203921	0.0590612	0.0209394	0.262434	304185753	promoter-TSS (ENSSSCT00000006267)	-324	ENSSSCT00000006267	NCS1
chr1	304185773	304185774	1	1	1	0.875	0	0.3	ENSSSCG00000005698	0.145367	0.0846454	NCS1	151.549	234.307	-0.628619	2.33e-20	four	1732217	0.741829	0.596462	0.145367	0.0846454	1.71736	0.0983401	0.11242	0.0859134	0.547317	304185774	promoter-TSS (ENSSSCT00000006267)	-303	ENSSSCT00000006267	NCS1
chr1	304185850	304185851	1	0.8	1	1	0	0.6364	ENSSSCG00000005698	0.123548	0.0559758	NCS1	151.549	234.307	-0.628619	2.33e-20	four	1732219	0.769019	0.645471	0.123548	0.0559758	2.20717	0.0746312	0.0930833	0.0273023	0.305491	304185851	promoter-TSS (ENSSSCT00000006267)	-226	ENSSSCT00000006267	NCS1
chr13	130509588	130509589	0.9	0.8421	0.9444	1	0.5	0.8	ENSSSCG00000021749	0.147044	0.0551631	MCF2L2	16.9422	25.2449	-0.575368	7.89e-07	four	4769956	0.913277	0.766232	0.147044	0.0551631	2.66563	0.0746312	0.0593283	0.00768437	0.141473	130509589	promoter-TSS (ENSSSCT00000026651)	65	ENSSSCT00000026651	MCF2L2
chr1	314152181	314152182	0.8333	0.5714	0.96	0.9091	0.8696	0	ENSSSCG00000005858	0.112179	0.0420161	RNF208	3.07133	7.42161	-1.27287	4.17e-08	four	1858790	0.253341	0.141162	0.112179	0.0420161	2.6699	0.0746312	0.109474	0.00758733	0.140328	314152182	promoter-TSS (ENSSSCT00000006437)	-495	ENSSSCT00000006437	RNF208
chr1	314152184	314152185	0.75	0.7333	0.6429	0.8947	0.7857	0	ENSSSCG00000005858	0.112179	0.0971083	RNF208	3.07133	7.42161	-1.27287	4.17e-08	four	1858791	0.253341	0.141162	0.112179	0.0971083	1.15519	0.113063	0.12117	0.248011	0.80874	314152185	promoter-TSS (ENSSSCT00000006437)	-492	ENSSSCT00000006437	RNF208
chr1	314152187	314152188	1	1	0.9429	0.8824	0.5769	0.2857	ENSSSCG00000005858	0.112179	0.0979013	RNF208	3.07133	7.42161	-1.27287	4.17e-08	four	1858792	0.253341	0.141162	0.112179	0.0979013	1.14584	0.113063	0.0752378	0.251863	0.812172	314152188	promoter-TSS (ENSSSCT00000006437)	-489	ENSSSCT00000006437	RNF208
chr1	314152190	314152191	0.9	0.6667	1	0.8571	0.7727	0.2667	ENSSSCG00000005858	0.112179	0.099281	RNF208	3.07133	7.42161	-1.27287	4.17e-08	four	1858793	0.253341	0.141162	0.112179	0.099281	1.12991	0.119983	0.0873398	0.258513	0.818035	314152191	promoter-TSS (ENSSSCT00000006437)	-486	ENSSSCT00000006437	RNF208
chr1	314152198	314152199	0.8182	0.5789	0.88	0.5	1	0	ENSSSCG00000005858	0.112179	0.0984781	RNF208	3.07133	7.42161	-1.27287	4.17e-08	four	1858794	0.253341	0.141162	0.112179	0.0984781	1.13912	0.119983	0.138513	0.254651	0.814643	314152199	promoter-TSS (ENSSSCT00000006437)	-478	ENSSSCT00000006437	RNF208
chr1	314152203	314152204	0.8571	0.9524	0.8966	0.7333	0.8	0	ENSSSCG00000005858	0.112179	0.100916	RNF208	3.07133	7.42161	-1.27287	4.17e-08	four	1858795	0.253341	0.141162	0.112179	0.100916	1.11161	0.127008	0.0735069	0.266307	0.824647	314152204	promoter-TSS (ENSSSCT00000006437)	-473	ENSSSCT00000006437	RNF208
chr1	314152212	314152213	0.9091	0.7241	0.7857	0.5	1	0	ENSSSCG00000005858	0.112179	0.102418	RNF208	3.07133	7.42161	-1.27287	4.17e-08	four	1858796	0.253341	0.141162	0.112179	0.102418	1.09531	0.147735	0.064944	0.273381	0.830449	314152213	promoter-TSS (ENSSSCT00000006437)	-464	ENSSSCT00000006437	RNF208
chr1	314152248	314152249	1	0.7143	0.8519	0.8571	0.8	0.35	ENSSSCG00000005858	0.112179	0.118539	RNF208	3.07133	7.42161	-1.27287	4.17e-08	four	1858797	0.253341	0.141162	0.112179	0.118539	0.946344	0.059945	0.0976897	0.343973	0.877491	314152249	promoter-TSS (ENSSSCT00000006437)	-428	ENSSSCT00000006437	RNF208
chr1	314152292	314152293	1	0.56	0.56	0.6364	0.8182	0.1333	ENSSSCG00000005858	0.112179	0.0395199	RNF208	3.07133	7.42161	-1.27287	4.17e-08	four	1858798	0.253341	0.141162	0.112179	0.0395199	2.83854	0.0746312	0.0736756	0.00453208	0.0999153	314152293	promoter-TSS (ENSSSCT00000006437)	-384	ENSSSCT00000006437	RNF208
chr1	314152301	314152302	0.8571	0.3158	1	0.7273	0.8	0	ENSSSCG00000005858	0.112179	0.0371632	RNF208	3.07133	7.42161	-1.27287	4.17e-08	four	1858799	0.253341	0.141162	0.112179	0.0371632	3.01855	0.0746312	0.15315	0.00253989	0.0672589	314152302	promoter-TSS (ENSSSCT00000006437)	-375	ENSSSCT00000006437	RNF208
chr1	314152306	314152307	1	0.6923	0.6296	0.8095	0.9091	0	ENSSSCG00000005858	0.112179	0.0371394	RNF208	3.07133	7.42161	-1.27287	4.17e-08	four	1858800	0.253341	0.141162	0.112179	0.0371394	3.02048	0.0746312	0.147264	0.00252376	0.0669652	314152307	promoter-TSS (ENSSSCT00000006437)	-370	ENSSSCT00000006437	RNF208
chr1	314152322	314152323	1	0.75	0.7143	0	0.8667	0.1667	ENSSSCG00000005858	0.112179	0.0356093	RNF208	3.07133	7.42161	-1.27287	4.17e-08	four	1858801	0.253341	0.141162	0.112179	0.0356093	3.15026	0.0746312	0.0558123	0.00163123	0.0493079	314152323	promoter-TSS (ENSSSCT00000006437)	-354	ENSSSCT00000006437	RNF208
chr13	143144189	143144190	0.55	0.65	0.931	1	1	0	ENSSSCG00000023527	0.277547	0.0905467	NRROS	0.654525	1.07616	-0.717378	0.0269527	four	4859901	0.535286	0.257738	0.277547	0.0905467	3.06524	0.397218	0.135806	0.00217495	0.0603838	143144190	promoter-TSS (ENSSSCT00000026267)	-136	ENSSSCT00000026267	NRROS
chr13	143144420	143144421	0.1304	0.3333	0.7857	0.8182	1	0.1765	ENSSSCG00000023527	0.297065	0.183583	NRROS	0.654525	1.07616	-0.717378	0.0269527	four	4859902	0.697525	0.40046	0.297065	0.183583	1.61815	0.11302	0.194937	0.105631	0.598307	143144421	promoter-TSS (ENSSSCT00000026267)	-367	ENSSSCT00000026267	NRROS
chr13	143144421	143144422	1	0.2308	0.7	0.6667	0.8824	0.3636	ENSSSCG00000023527	0.297065	0.101506	NRROS	0.654525	1.07616	-0.717378	0.0269527	four	4859903	0.697525	0.40046	0.297065	0.101506	2.92656	0.0746312	0.065279	0.00342729	0.082685	143144422	promoter-TSS (ENSSSCT00000026267)	-368	ENSSSCT00000026267	NRROS
chr13	148480016	148480017	0	1	0.7692	1	0.7692	0.6667	ENSSSCG00000011884	0.13274	0.0415987	HCLS1	12.334	19.0865	-0.629905	1.47e-08	four	4900472	0.646363	0.513624	0.13274	0.0415987	3.19095	0.0460812	0.0499809	0.00141805	0.044649	148480017	promoter-TSS (ENSSSCT00000013000)	9	ENSSSCT00000013000	HCLS1	cortactin
chr13	148480056	148480057	0	0.75	0.6154	0.9	0.6	0.5532	ENSSSCG00000011884	0.13274	0.0500281	HCLS1	12.334	19.0865	-0.629905	1.47e-08	four	4900473	0.646363	0.513624	0.13274	0.0500281	2.6533	0.0425563	0.0364713	0.00797093	0.144839	148480057	promoter-TSS (ENSSSCT00000013000)	49	ENSSSCT00000013000	HCLS1	cortactin
chr13	148480083	148480084	0	1	0.9333	0.9231	0.8333	0.58	ENSSSCG00000011884	0.13274	0.0485367	HCLS1	12.334	19.0865	-0.629905	1.47e-08	four	4900474	0.646363	0.513624	0.13274	0.0485367	2.73483	0.0594188	0.0394272	0.00624122	0.123558	148480084	promoter-TSS (ENSSSCT00000013000)	76	ENSSSCT00000013000	HCLS1	cortactin
chr13	157394297	157394298	0.975	0.7692	0.5294	0.8846	1	0.7857	ENSSSCG00000021511	0.118409	0.135218	GCSAM	0	0.144404	#NAME?	0.0359763	four	4946682	0.70329	0.58488	0.118409	0.135218	0.875691	0.121318	0.0655996	0.381198	0.896527	157394298	promoter-TSS (ENSSSCT00000030237)	-116	ENSSSCT00000030237	GCSAM
chr13	192283854	192283855	0.963	0.0833	0.8	1	0.7857	0	ENSSSCG00000012012	0.115868	0.153987	CXADR	18.4203	30.868	-0.744814	1.76e-29	four	5073015	0.601364	0.485496	0.115868	0.153987	0.752455	0.989475	0.989475	0.451778	0.924859	192283855	promoter-TSS (ENSSSCT00000013143)	-986	ENSSSCT00000013143		coxsackievirus and adenovirus receptor
chr13	215011786	215011787	0.8571	0.875	0.6923	0.9375	0.9615	0.6	ENSSSCG00000012077	0.116548	0.0739526	MX1	30.6999	51.9969	-0.760191	9.93e-31	four	5223249	0.908869	0.792321	0.116548	0.0739526	1.57598	0.0879586	0.0730113	0.115031	0.619622	215011787	promoter-TSS (ENSSSCT00000034940)	-523	ENSSSCT00000034940	MX1	interferon-induced GTP-binding protein Mx1
chr13	215011856	215011857	0.9545	0.7778	1	1	0.9	1	ENSSSCG00000012077	0.15589	0.059788	MX1	30.6999	51.9969	-0.760191	9.93e-31	four	5223250	0.90409	0.7482	0.15589	0.059788	2.60739	0.0746312	0.104434	0.00912366	0.157944	215011857	promoter-TSS (ENSSSCT00000034940)	-593	ENSSSCT00000034940	MX1	interferon-induced GTP-binding protein Mx1
chr13	28703547	28703548	0.8	0.0408	0.9286	0.9091	1	0	ENSSSCG00000011280	0.134428	0.0889887	VIPR1	2.40209	3.72631	-0.633458	0.000495526	four	4233751	0.228487	0.0940588	0.134428	0.0889887	1.51062	0.210343	0.0848079	0.130885	0.65236	28703548	promoter-TSS (ENSSSCT00000012349)	-659	ENSSSCT00000012349	VPAC1	vasoactive intestinal peptide receptor 1
chr13	28703550	28703551	0.9787	0	1	0.5	0.4286	0	ENSSSCG00000011280	0.134428	0.0748876	VIPR1	2.40209	3.72631	-0.633458	0.000495526	four	4233752	0.228487	0.0940588	0.134428	0.0748876	1.79507	0.123356	0.0830983	0.0726428	0.507103	28703551	promoter-TSS (ENSSSCT00000012349)	-656	ENSSSCT00000012349	VPAC1	vasoactive intestinal peptide receptor 1
chr13	28703574	28703575	0.9574	0	0.8571	1	0.3333	0	ENSSSCG00000011280	0.115238	0.0982384	VIPR1	2.40209	3.72631	-0.633458	0.000495526	four	4233754	0.197028	0.0817899	0.115238	0.0982384	1.17305	0.0533109	0.0828315	0.240777	0.801979	28703575	promoter-TSS (ENSSSCT00000012349)	-632	ENSSSCT00000012349	VPAC1	vasoactive intestinal peptide receptor 1
chr13	28703579	28703580	1	0	1	1	0.5	0	ENSSSCG00000011280	0.115238	0.0674617	VIPR1	2.40209	3.72631	-0.633458	0.000495526	four	4233756	0.197028	0.0817899	0.115238	0.0674617	1.7082	0.111012	0.0828315	0.0875993	0.552031	28703580	promoter-TSS (ENSSSCT00000012349)	-627	ENSSSCT00000012349	VPAC1	vasoactive intestinal peptide receptor 1
chr13	28703595	28703596	0.9333	0	0.6667	0.6875	0.48	0	ENSSSCG00000011280	0.115238	0.0278488	VIPR1	2.40209	3.72631	-0.633458	0.000495526	four	4233760	0.197028	0.0817899	0.115238	0.0278488	4.13799	0.0746312	0.0828315	3.5e-05	0.00273514	28703596	promoter-TSS (ENSSSCT00000012349)	-611	ENSSSCT00000012349	VPAC1	vasoactive intestinal peptide receptor 1
chr13	28869716	28869717	0.9286	1	0	1	0.6364	0.75	ENSSSCG00000011286	0.113523	0.108168	KLHL40	1.73791	3.56509	-1.03659	0.000154856	four	4235658	0.908471	0.794948	0.113523	0.108168	1.0495	0.0507498	0.0778533	0.293948	0.845985	28869717	promoter-TSS (ENSSSCT00000012356)	-686	ENSSSCT00000012356	KLHL40
chr13	35520458	35520459	1	0.7308	1	0.7	0.25	0	ENSSSCG00000011393	0.105838	0.0705792	UBA7	1.38719	3.06374	-1.14313	1.2e-16	four	4287893	0.492547	0.386709	0.105838	0.0705792	1.49956	0.291033	0.169741	0.133728	0.657834	35520459	promoter-TSS (ENSSSCT00000035591)	27	ENSSSCT00000034482	UBA7	ubiquitin-activating enzyme E1-like
chr13	35520480	35520481	1	0.7857	1	0.8571	1	0.2667	ENSSSCG00000011393	0.105838	0.0969543	UBA7	1.38719	3.06374	-1.14313	1.2e-16	four	4287894	0.492547	0.386709	0.105838	0.0969543	1.09163	0.0937918	0.0498225	0.274998	0.831705	35520481	promoter-TSS (ENSSSCT00000035591)	5	ENSSSCT00000034482	UBA7	ubiquitin-activating enzyme E1-like
chr13	35520500	35520501	1	1	1	0.1111	1	0.375	ENSSSCG00000011393	0.105838	0.0919528	UBA7	1.38719	3.06374	-1.14313	1.2e-16	four	4287895	0.492547	0.386709	0.105838	0.0919528	1.151	0.116164	0.0438758	0.249731	0.810271	35520501	promoter-TSS (ENSSSCT00000035591)	-15	ENSSSCT00000034482	UBA7	ubiquitin-activating enzyme E1-like
chr13	38361175	38361176	0.6226	0.8235	0.4545	0.75	1	0	ENSSSCG00000023503	0.109291	0.0725132	PRKCD	6.8124	10.9017	-0.678311	3.68e-07	four	4314731	0.170038	0.0607471	0.109291	0.0725132	1.50719	0.113555	0.0993215	0.131763	0.65407	38361176	promoter-TSS (ENSSSCT00000026074)	-196	ENSSSCT00000026074	PRKCD	novel protein kinase C delta type
chr13	38361188	38361189	0.8	0.9091	0.1176	0.9167	0.8824	0	ENSSSCG00000023503	0.109291	0.070517	PRKCD	6.8124	10.9017	-0.678311	3.68e-07	four	4314732	0.170038	0.0607471	0.109291	0.070517	1.54985	0.103509	0.100187	0.121177	0.632798	38361189	promoter-TSS (ENSSSCT00000026074)	-183	ENSSSCT00000026074	PRKCD	novel protein kinase C delta type
chr13	38361192	38361193	0.3333	0.7	0.0833	0.8889	1	0	ENSSSCG00000023503	0.109291	0.0705992	PRKCD	6.8124	10.9017	-0.678311	3.68e-07	four	4314733	0.170038	0.0607471	0.109291	0.0705992	1.54805	0.100163	0.053561	0.121611	0.633698	38361193	promoter-TSS (ENSSSCT00000026074)	-179	ENSSSCT00000026074	PRKCD	novel protein kinase C delta type
chr13	38361208	38361209	0	1	0.3	1	0.8	0	ENSSSCG00000023503	0.109291	0.0705387	PRKCD	6.8124	10.9017	-0.678311	3.68e-07	four	4314734	0.170038	0.0607471	0.109291	0.0705387	1.54938	0.103509	0.101037	0.121291	0.633033	38361209	promoter-TSS (ENSSSCT00000026074)	-163	ENSSSCT00000026074	PRKCD	novel protein kinase C delta type
chr13	38361217	38361218	0	0.8333	0.9	0.8	1	0	ENSSSCG00000023503	0.120391	0.0737116	PRKCD	6.8124	10.9017	-0.678311	3.68e-07	four	4314735	0.182959	0.0625674	0.120391	0.0737116	1.63327	0.106946	0.10155	0.102411	0.590508	38361218	promoter-TSS (ENSSSCT00000026074)	-154	ENSSSCT00000026074	PRKCD	novel protein kinase C delta type
chr13	38361222	38361223	0	0.8571	0.6	1	1	0	ENSSSCG00000023503	0.120391	0.0736912	PRKCD	6.8124	10.9017	-0.678311	3.68e-07	four	4314736	0.182959	0.0625674	0.120391	0.0736912	1.63373	0.106946	0.100658	0.102316	0.590276	38361223	promoter-TSS (ENSSSCT00000026074)	-149	ENSSSCT00000026074	PRKCD	novel protein kinase C delta type
chr13	38361238	38361239	0	0.8667	0.7333	1	0.5227	0	ENSSSCG00000023503	0.128422	0.03015	PRKCD	6.8124	10.9017	-0.678311	3.68e-07	four	4314737	0.193418	0.0649959	0.128422	0.03015	4.25944	0.0746312	0.101643	2.05e-05	0.00178821	38361239	promoter-TSS (ENSSSCT00000026074)	-133	ENSSSCT00000026074	PRKCD	novel protein kinase C delta type
chr13	38361241	38361242	0	0.8571	1	1	0.75	0	ENSSSCG00000023503	0.128422	0.0297476	PRKCD	6.8124	10.9017	-0.678311	3.68e-07	four	4314738	0.193418	0.0649959	0.128422	0.0297476	4.31705	0.0746312	0.0965047	1.58e-05	0.00145309	38361242	promoter-TSS (ENSSSCT00000026074)	-130	ENSSSCT00000026074	PRKCD	novel protein kinase C delta type
chr13	38361261	38361262	0	0.7333	0.8846	0.913	0.5833	0	ENSSSCG00000023503	0.111557	0.0280224	PRKCD	6.8124	10.9017	-0.678311	3.68e-07	four	4314739	0.184627	0.0730693	0.111557	0.0280224	3.98101	0.0746312	0.0977309	6.86e-05	0.0046311	38361262	promoter-TSS (ENSSSCT00000026074)	-110	ENSSSCT00000026074	PRKCD	novel protein kinase C delta type
chr13	38361263	38361264	0	0.3	0.6429	0.381	1	0	ENSSSCG00000023503	0.109906	0.0275214	PRKCD	6.8124	10.9017	-0.678311	3.68e-07	four	4314740	0.183968	0.0740622	0.109906	0.0275214	3.99347	0.0746312	0.0984991	6.51e-05	0.0044455	38361264	promoter-TSS (ENSSSCT00000026074)	-108	ENSSSCT00000026074	PRKCD	novel protein kinase C delta type
chr14	109711230	109711231	1	0.8333	0.9118	0.8889	1	0.6429	ENSSSCG00000010444	0.116367	0.184306	LIPM	0	0.680217	#NAME?	1.91e-06	four	6088626	0.779956	0.66359	0.116367	0.184306	0.631378	0.144758	0.0560589	0.527794	0.946854	109711231	promoter-TSS (ENSSSCT00000011429)	-207	ENSSSCT00000011429	LIPM
chr14	140492300	140492301	0.9167	0.8571	1	0.7647	0.9167	1	ENSSSCG00000010678	0.144911	0.0679753	NANOS1	2.07799	4.09786	-0.979683	7.68e-07	four	6307505	0.77304	0.62813	0.144911	0.0679753	2.13181	0.0746312	0.52307	0.0330223	0.339473	140492301	promoter-TSS (ENSSSCT00000011679)	-995	ENSSSCT00000011679	NANOS1
chr14	140492495	140492496	0.2	0.7143	1	1	0.9804	0.9231	ENSSSCG00000010678	0.190458	0.0396791	NANOS1	2.07799	4.09786	-0.979683	7.68e-07	four	6307507	0.41104	0.220582	0.190458	0.0396791	4.79996	0.0746312	0.389713	1.59e-06	0.000226064	140492496	promoter-TSS (ENSSSCT00000011679)	-800	ENSSSCT00000011679	NANOS1
chr14	140492523	140492524	0.3	1	0.9091	1	0.8333	0.2353	ENSSSCG00000010678	0.130342	0.0815496	NANOS1	2.07799	4.09786	-0.979683	7.68e-07	four	6307509	0.342326	0.211984	0.130342	0.0815496	1.59832	0.0941118	0.0546533	0.109973	0.608318	140492524	promoter-TSS (ENSSSCT00000011679)	-772	ENSSSCT00000011679	NANOS1
chr14	140492525	140492526	0.5	0.5455	0.7857	0.7727	1	0.2105	ENSSSCG00000010678	0.130342	0.083981	NANOS1	2.07799	4.09786	-0.979683	7.68e-07	four	6307511	0.342326	0.211984	0.130342	0.083981	1.55204	0.0728327	0.0548978	0.120652	0.631698	140492526	promoter-TSS (ENSSSCT00000011679)	-770	ENSSSCT00000011679	NANOS1
chr14	140492560	140492561	0.9375	0.9444	0.8	0.8	0.4167	0.0909	ENSSSCG00000010678	0.110332	0.0614708	NANOS1	2.07799	4.09786	-0.979683	7.68e-07	four	6307512	0.287092	0.17676	0.110332	0.0614708	1.79486	0.194791	0.0637023	0.0726753	0.507206	140492561	promoter-TSS (ENSSSCT00000011679)	-735	ENSSSCT00000011679	NANOS1
chr14	140492561	140492562	1	1	0	0.8696	0.8571	0	ENSSSCG00000010678	0.110332	0.0652011	NANOS1	2.07799	4.09786	-0.979683	7.68e-07	four	6307513	0.287092	0.17676	0.110332	0.0652011	1.69218	0.0611385	0.145132	0.0906126	0.560356	140492562	promoter-TSS (ENSSSCT00000011679)	-734	ENSSSCT00000011679	NANOS1
chr14	140492568	140492569	0.7692	0.8857	1	0.8667	0.4706	0	ENSSSCG00000010678	0.110332	0.0607462	NANOS1	2.07799	4.09786	-0.979683	7.68e-07	four	6307514	0.287092	0.17676	0.110332	0.0607462	1.81627	0.194791	0.138993	0.0693284	0.496077	140492569	promoter-TSS (ENSSSCT00000011679)	-727	ENSSSCT00000011679	NANOS1
chr14	140492569	140492570	0.8333	0.625	0.8947	1	0.9444	0.1333	ENSSSCG00000010678	0.110332	0.042881	NANOS1	2.07799	4.09786	-0.979683	7.68e-07	four	6307515	0.287092	0.17676	0.110332	0.042881	2.57297	0.0746312	0.0568209	0.0100829	0.168278	140492570	promoter-TSS (ENSSSCT00000011679)	-726	ENSSSCT00000011679	NANOS1
chr14	145011156	145011157	0.9714	0.4545	1	0.4286	0.8	0.1667	ENSSSCG00000010728	0.113307	0.0953075	CPXM2	3.20163	11.7098	-1.87084	9.83e-42	four	6369832	0.575017	0.46171	0.113307	0.0953075	1.18886	0.50388	0.0962323	0.234496	0.795856	145011157	promoter-TSS (ENSSSCT00000011739)	-474	ENSSSCT00000011739	CPXM2
chr14	145011173	145011174	0.8667	0.9	1	0.381	1	0.3636	ENSSSCG00000010728	0.113307	0.166184	CPXM2	3.20163	11.7098	-1.87084	9.83e-42	four	6369833	0.575017	0.46171	0.113307	0.166184	0.681815	0.0536646	0.0533191	0.495356	0.938292	145011174	promoter-TSS (ENSSSCT00000011739)	-491	ENSSSCT00000011739	CPXM2
chr14	145011199	145011200	0.9333	0.8947	0.7647	0.5294	0.6	0.4	ENSSSCG00000010728	0.113307	0.123924	CPXM2	3.20163	11.7098	-1.87084	9.83e-42	four	6369834	0.575017	0.46171	0.113307	0.123924	0.914328	0.0659398	0.0622237	0.360544	0.886282	145011200	promoter-TSS (ENSSSCT00000011739)	-517	ENSSSCT00000011739	CPXM2
chr14	145011394	145011395	0.9394	0.3947	0.6486	0.3636	0.3636	0.4	ENSSSCG00000010728	0.102489	0.0711676	CPXM2	3.20163	11.7098	-1.87084	9.83e-42	four	6369839	0.666047	0.563558	0.102489	0.0711676	1.44011	0.254478	0.0646502	0.149837	0.686452	145011395	promoter-TSS (ENSSSCT00000011739)	-712	ENSSSCT00000011739	CPXM2
chr1	43979279	43979280	0.8462	0.7037	0.7333	0.8462	0.4545	0	ENSSSCG00000004232	0.127188	0.13813	CLVS2	32.7476	53.1474	-0.69861	4.26e-32	four	346748	0.215794	0.0886059	0.127188	0.13813	0.920784	0.111617	0.0888149	0.357163	0.884576	43979280	promoter-TSS (ENSSSCT00000004677)	-233	ENSSSCT00000004677	CLVS2
chr1	43979310	43979311	1	0.9231	0.6667	1	0.875	0	ENSSSCG00000004232	0.127188	0.142255	CLVS2	32.7476	53.1474	-0.69861	4.26e-32	four	346749	0.215794	0.0886059	0.127188	0.142255	0.894081	0.116558	0.109042	0.371279	0.891714	43979311	promoter-TSS (ENSSSCT00000004677)	-264	ENSSSCT00000004677	CLVS2
chr14	4306832	4306833	0.4	0.8519	1	1	0.7222	0.9375	ENSSSCG00000009601	0.101112	0.0481181	SLC18A1	0.792926	1.45582	-0.876577	0.0363527	four	5334410	0.88188	0.780767	0.101112	0.0481181	2.10134	0.0710764	0.181141	0.0356111	0.353752	4306833	promoter-TSS (ENSSSCT00000010524)	-375	ENSSSCT00000010524	SLC18A1	MFS transporter, DHA1 family, solute carrier family 18 (vesicular amine transporter), member 1/2
chr14	4306907	4306908	0.4872	0.72	0.8462	1	0.7143	0.619	ENSSSCG00000009601	0.101112	0.062381	SLC18A1	0.792926	1.45582	-0.876577	0.0363527	four	5334411	0.88188	0.780767	0.101112	0.062381	1.62089	0.205279	0.0570401	0.105042	0.596906	4306908	promoter-TSS (ENSSSCT00000010524)	-450	ENSSSCT00000010524	SLC18A1	MFS transporter, DHA1 family, solute carrier family 18 (vesicular amine transporter), member 1/2
chr14	4306924	4306925	0.8824	1	0.5385	0.9167	0.7	0.7059	ENSSSCG00000009601	0.101112	0.0737176	SLC18A1	0.792926	1.45582	-0.876577	0.0363527	four	5334412	0.88188	0.780767	0.101112	0.0737176	1.37162	0.0533615	0.0393478	0.170182	0.718167	4306925	promoter-TSS (ENSSSCT00000010524)	-467	ENSSSCT00000010524	SLC18A1	MFS transporter, DHA1 family, solute carrier family 18 (vesicular amine transporter), member 1/2
chr14	4306977	4306978	0.7222	1	0.4167	0.8182	1	0.8824	ENSSSCG00000009601	0.101112	0.0634012	SLC18A1	0.792926	1.45582	-0.876577	0.0363527	four	5334413	0.88188	0.780767	0.101112	0.0634012	1.5948	0.0829954	0.118859	0.110756	0.610106	4306978	promoter-TSS (ENSSSCT00000010524)	-520	ENSSSCT00000010524	SLC18A1	MFS transporter, DHA1 family, solute carrier family 18 (vesicular amine transporter), member 1/2
chr14	51540656	51540657	1	0.8421	1	0.1765	1	0	ENSSSCG00000010031	0.118547	0.0233955	SFI1	1.66794	2.8492	-0.77249	2.08e-06	four	5717158	0.211575	0.0930273	0.118547	0.0233955	5.06709	0.0746312	0.10264	4.04e-07	7.3e-05	51540657	promoter-TSS (ENSSSCT00000010988)	-1	ENSSSCT00000010988	SFI1
chr14	51540658	51540659	0.1333	0.92	1	0.0909	0.8	0	ENSSSCG00000010031	0.118547	0.0233955	SFI1	1.66794	2.8492	-0.77249	2.08e-06	four	5717160	0.211575	0.0930273	0.118547	0.0233955	5.06709	0.0746312	0.10264	4.04e-07	7.3e-05	51540659	promoter-TSS (ENSSSCT00000010988)	-3	ENSSSCT00000010988	SFI1
chr14	51540665	51540666	0.5833	0.5	0.9375	0.4138	1	0	ENSSSCG00000010031	0.118547	0.0246336	SFI1	1.66794	2.8492	-0.77249	2.08e-06	four	5717164	0.211575	0.0930273	0.118547	0.0246336	4.81242	0.0746312	0.0555535	1.49e-06	0.000214792	51540666	promoter-TSS (ENSSSCT00000010988)	-10	ENSSSCT00000010988	SFI1
chr14	51540674	51540675	0.8	0.7692	0.6667	0.4375	0.85	0	ENSSSCG00000010031	0.123921	0.0234735	SFI1	1.66794	2.8492	-0.77249	2.08e-06	four	5717166	0.216054	0.0921322	0.123921	0.0234735	5.27921	0.0746312	0.100764	1.3e-07	2.83e-05	51540675	promoter-TSS (ENSSSCT00000010988)	-19	ENSSSCT00000010988	SFI1
chr14	51540678	51540679	1	1	1	0.5172	0.6364	0	ENSSSCG00000010031	0.123921	0.0233927	SFI1	1.66794	2.8492	-0.77249	2.08e-06	four	5717168	0.216054	0.0921322	0.123921	0.0233927	5.29744	0.0746312	0.0992609	1.17e-07	2.6e-05	51540679	promoter-TSS (ENSSSCT00000010988)	-23	ENSSSCT00000010988	SFI1
chr14	53709469	53709470	0.8824	1	0	1	0.7222	0.0769	ENSSSCG00000010086	0.102359	0.0389664	CCDC116	0.742703	1.68693	-1.18354	0.00128114	four	5740407	0.294231	0.191872	0.102359	0.0389664	2.62686	0.0662601	0.108381	0.0086178	0.152296	53709470	promoter-TSS (ENSSSCT00000011047)	-14	ENSSSCT00000011047	CCDC116
chr14	53709494	53709495	1	1	0	0.9091	0.8571	0.1818	ENSSSCG00000010086	0.101518	0.0334408	CCDC116	0.742703	1.68693	-1.18354	0.00128114	four	5740409	0.261397	0.159879	0.101518	0.0334408	3.03574	0.0583906	0.0470204	0.00239947	0.0646647	53709495	promoter-TSS (ENSSSCT00000011047)	-39	ENSSSCT00000011047	CCDC116
chr14	53709509	53709510	1	0.8667	0	0.875	0.8571	0.1818	ENSSSCG00000010086	0.104474	0.0293262	CCDC116	0.742703	1.68693	-1.18354	0.00128114	four	5740410	0.254478	0.150003	0.104474	0.0293262	3.5625	0.118912	0.0718775	0.000367346	0.0166611	53709510	promoter-TSS (ENSSSCT00000011047)	-54	ENSSSCT00000011047	CCDC116
chr14	53709580	53709581	0.4	0.8621	0.7143	0.625	1	0	ENSSSCG00000010086	0.107537	0.0183956	CCDC116	0.742703	1.68693	-1.18354	0.00128114	four	5740415	0.241806	0.134269	0.107537	0.0183956	5.84583	0.0746312	0.141227	5.04e-09	1.8e-06	53709581	promoter-TSS (ENSSSCT00000011047)	-125	ENSSSCT00000011047	CCDC116
chr14	53709586	53709587	1	1	0.25	0.6	0.8	0.0714	ENSSSCG00000010086	0.107953	0.0199354	CCDC116	0.742703	1.68693	-1.18354	0.00128114	four	5740417	0.238797	0.130843	0.107953	0.0199354	5.41517	0.0746312	0.0744045	6.12e-08	1.5e-05	53709587	promoter-TSS (ENSSSCT00000011047)	-131	ENSSSCT00000011047	CCDC116
chr14	53709598	53709599	0.9167	1	0.5625	0.6207	0.6667	0.1176	ENSSSCG00000010086	0.107953	0.0376228	CCDC116	0.742703	1.68693	-1.18354	0.00128114	four	5740419	0.238797	0.130843	0.107953	0.0376228	2.86936	0.0505	0.0521057	0.00411299	0.0935996	53709599	promoter-TSS (ENSSSCT00000011047)	-143	ENSSSCT00000011047	CCDC116
chr14	53709602	53709603	1	1	0.4286	1	0.5833	0	ENSSSCG00000010086	0.108327	0.0270829	CCDC116	0.742703	1.68693	-1.18354	0.00128114	four	5740421	0.235831	0.127504	0.108327	0.0270829	3.99984	0.0718462	0.248816	6.34e-05	0.00435304	53709603	promoter-TSS (ENSSSCT00000011047)	-147	ENSSSCT00000011047	CCDC116
chr14	53709621	53709622	0.6667	1	0.8	0.8718	1	0	ENSSSCG00000010086	0.107104	0.0264817	CCDC116	0.742703	1.68693	-1.18354	0.00128114	four	5740423	0.222924	0.11582	0.107104	0.0264817	4.04447	0.224742	0.223594	5.24e-05	0.00375463	53709622	promoter-TSS (ENSSSCT00000011047)	-166	ENSSSCT00000011047	CCDC116
chr14	53709633	53709634	1	1	0.4667	0.9744	0.9091	0	ENSSSCG00000010086	0.105011	0.0298371	CCDC116	0.742703	1.68693	-1.18354	0.00128114	four	5740425	0.220206	0.115194	0.105011	0.0298371	3.51949	0.0848513	0.231711	0.000432378	0.0188138	53709634	promoter-TSS (ENSSSCT00000011047)	-178	ENSSSCT00000011047	CCDC116
chr15	107074827	107074828	0.9048	1	0.5	0.8889	1	0.6429	ENSSSCG00000016059	0.23496	0.1142	STAT4	0.423979	1.01816	-1.26389	0.00117376	four	7031433	0.882068	0.647108	0.23496	0.1142	2.05744	0.0812651	0.0514045	0.039644	0.37467	107074828	promoter-TSS (ENSSSCT00000017484)	-807	ENSSSCT00000017484	STAT4	signal transducer and activator of transcription 4
chr15	107657670	107657671	0.9189	1	1	0.6522	0	0	ENSSSCG00000016062	0.151592	0.136837	NABP1	12.8565	22.3266	-0.796269	1.2e-12	four	7034468	0.335838	0.184245	0.151592	0.136837	1.10783	0.379294	0.0741019	0.267933	0.826004	107657671	promoter-TSS (ENSSSCT00000017487)	-786	ENSSSCT00000017487	NABP1
chr15	117099982	117099983	0.5833	0	0.8182	0.8125	0.8824	0.1818	ENSSSCG00000016110	0.107931	0.068486	KIAA2012	0.956532	1.82055	-0.928491	0.00656471	four	7094874	0.227427	0.119497	0.107931	0.068486	1.57596	0.0929963	0.0997332	0.115036	0.619633	117099983	promoter-TSS (ENSSSCT00000017541)	-60	ENSSSCT00000017541
chr15	134560027	134560028	1	0.1	1	0.7857	1	0.3077	ENSSSCG00000020785	0.112412	0.139631	DES	2.79171	4.30061	-0.623393	0.000405322	four	7199830	0.451195	0.338782	0.112412	0.139631	0.805069	0.0488349	0.258304	0.42078	0.913455	134560028	promoter-TSS (ENSSSCT00000030104)	-432	ENSSSCT00000030104	DES	desmin
chr15	134560100	134560101	1	0.1	0.8679	0.8462	1	0.1	ENSSSCG00000020785	0.19975	0.0493962	DES	2.79171	4.30061	-0.623393	0.000405322	four	7199832	0.46941	0.26966	0.19975	0.0493962	4.04384	0.0746312	0.0779048	5.26e-05	0.00376239	134560101	promoter-TSS (ENSSSCT00000030104)	-359	ENSSSCT00000030104	DES	desmin
chr15	147379256	147379257	0.3148	1	0.9	0.8571	0.9655	0.3	ENSSSCG00000016295	0.187525	0.0594261	NGEF	50.81	81.5142	-0.681939	1.06e-20	four	7300662	0.532445	0.344919	0.187525	0.0594261	3.1556	0.0746312	0.0582847	0.00160168	0.0486757	147379257	promoter-TSS (ENSSSCT00000017744)	-812	ENSSSCT00000017744	NGEF	neuronal guanine nucleotide exchange factor
chr15	147379263	147379264	0.8889	0.1667	0.8182	1	0.8387	0	ENSSSCG00000016295	0.161572	0.056384	NGEF	50.81	81.5142	-0.681939	1.06e-20	four	7300663	0.523659	0.362087	0.161572	0.056384	2.86557	0.0746312	0.222097	0.00416264	0.0943566	147379264	promoter-TSS (ENSSSCT00000017744)	-819	ENSSSCT00000017744	NGEF	neuronal guanine nucleotide exchange factor
chr15	147379271	147379272	0.9545	0.8	0.8333	0.8182	0.8684	0	ENSSSCG00000016295	0.225257	0.0491756	NGEF	50.81	81.5142	-0.681939	1.06e-20	four	7300664	0.570355	0.345098	0.225257	0.0491756	4.58067	0.0746312	0.188141	4.63e-06	0.00054162	147379272	promoter-TSS (ENSSSCT00000017744)	-827	ENSSSCT00000017744	NGEF	neuronal guanine nucleotide exchange factor
chr15	147379294	147379295	0.6364	1	0.3	0.8889	0.6042	0.6	ENSSSCG00000016295	0.211351	0.065628	NGEF	50.81	81.5142	-0.681939	1.06e-20	four	7300665	0.591923	0.380572	0.211351	0.065628	3.22043	0.0746312	0.0726126	0.00127997	0.041505	147379295	promoter-TSS (ENSSSCT00000017744)	-850	ENSSSCT00000017744	NGEF	neuronal guanine nucleotide exchange factor
chr15	147379300	147379301	0.9032	1	0.7143	0.8462	0.8627	0.4	ENSSSCG00000016295	0.190934	0.0563516	NGEF	50.81	81.5142	-0.681939	1.06e-20	four	7300667	0.575372	0.384438	0.190934	0.0563516	3.38826	0.0746312	0.0524519	0.000703369	0.0269206	147379301	promoter-TSS (ENSSSCT00000017744)	-856	ENSSSCT00000017744	NGEF	neuronal guanine nucleotide exchange factor
chr15	147379319	147379320	1	1	0.8333	0.7	0.8478	0.0833	ENSSSCG00000016295	0.26353	0.04892	NGEF	50.81	81.5142	-0.681939	1.06e-20	four	7300668	0.644219	0.380689	0.26353	0.04892	5.38695	0.0746312	0.164995	7.17e-08	1.72e-05	147379320	promoter-TSS (ENSSSCT00000017744)	-875	ENSSSCT00000017744	NGEF	neuronal guanine nucleotide exchange factor
chr15	147379326	147379327	0.8333	0.6111	0.8333	0.3043	0.9091	0.1	ENSSSCG00000016295	0.26353	0.0436414	NGEF	50.81	81.5142	-0.681939	1.06e-20	four	7300669	0.644219	0.380689	0.26353	0.0436414	6.03852	0.0746312	0.254375	1.56e-09	6.57e-07	147379327	promoter-TSS (ENSSSCT00000017744)	-882	ENSSSCT00000017744	NGEF	neuronal guanine nucleotide exchange factor
chr15	147379395	147379396	1	0.8421	0.5	0.9	0.8	0.5455	ENSSSCG00000016295	0.24755	0.0428895	NGEF	50.81	81.5142	-0.681939	1.06e-20	four	7300670	0.631988	0.384438	0.24755	0.0428895	5.77182	0.0746312	0.069591	7.84e-09	2.62e-06	147379396	promoter-TSS (ENSSSCT00000017744)	-951	ENSSSCT00000017744	NGEF	neuronal guanine nucleotide exchange factor
chr15	22097598	22097599	0.9556	1	0.9444	0.9091	1	0.3333	ENSSSCG00000015706	0.130477	0.0430465	LYPD1	7.26865	11.1247	-0.614008	7.19e-06	four	6599546	0.563826	0.433348	0.130477	0.0430465	3.03107	0.068578	0.0840865	0.00243686	0.0653591	22097599	promoter-TSS (ENSSSCT00000017106)	-998	ENSSSCT00000017106	LYPD1
chr15	22097610	22097611	0.9608	0.7778	0.9375	0.8333	1	0.6522	ENSSSCG00000015706	0.130477	0.0419509	LYPD1	7.26865	11.1247	-0.614008	7.19e-06	four	6599547	0.563826	0.433348	0.130477	0.0419509	3.11023	0.143132	0.0949945	0.0018694	0.054289	22097611	promoter-TSS (ENSSSCT00000017106)	-986	ENSSSCT00000017106	LYPD1
chr15	22097614	22097615	0.2857	0.9375	0.9259	1	0.6923	0.5833	ENSSSCG00000015706	0.130477	0.0400992	LYPD1	7.26865	11.1247	-0.614008	7.19e-06	four	6599548	0.563826	0.433348	0.130477	0.0400992	3.25386	0.0998719	0.140109	0.00113848	0.0381656	22097615	promoter-TSS (ENSSSCT00000017106)	-982	ENSSSCT00000017106	LYPD1
chr15	22097627	22097628	1	0.8182	0.92	1	0.5	0.8333	ENSSSCG00000015706	0.130221	0.0358233	LYPD1	7.26865	11.1247	-0.614008	7.19e-06	four	6599549	0.560066	0.429845	0.130221	0.0358233	3.63509	0.235609	0.225219	0.000277888	0.0135177	22097628	promoter-TSS (ENSSSCT00000017106)	-969	ENSSSCT00000017106	LYPD1
chr15	22097633	22097634	0.7778	0.9355	0.5	1	1	0.3333	ENSSSCG00000015706	0.130221	0.0308364	LYPD1	7.26865	11.1247	-0.614008	7.19e-06	four	6599550	0.560066	0.429845	0.130221	0.0308364	4.22296	0.0746312	0.0508626	2.41e-05	0.00203596	22097634	promoter-TSS (ENSSSCT00000017106)	-963	ENSSSCT00000017106	LYPD1
chr15	22097652	22097653	0.8889	1	0.9091	0.8947	0.6667	0	ENSSSCG00000015706	0.130221	0.025897	LYPD1	7.26865	11.1247	-0.614008	7.19e-06	four	6599551	0.560066	0.429845	0.130221	0.025897	5.02842	0.698563	0.628613	4.95e-07	8.64e-05	22097653	promoter-TSS (ENSSSCT00000017106)	-944	ENSSSCT00000017106	LYPD1
chr15	22097660	22097661	0.7857	0.8	0.931	0.8824	0.8	0.3636	ENSSSCG00000015706	0.128611	0.051445	LYPD1	7.26865	11.1247	-0.614008	7.19e-06	four	6599552	0.55971	0.431098	0.128611	0.051445	2.49998	0.0628954	0.0369788	0.01242	0.191705	22097661	promoter-TSS (ENSSSCT00000017106)	-936	ENSSSCT00000017106	LYPD1
chr15	22097682	22097683	1	0.8214	0.6154	1	0.6667	0.3684	ENSSSCG00000015706	0.118775	0.0496979	LYPD1	7.26865	11.1247	-0.614008	7.19e-06	four	6599553	0.552868	0.434093	0.118775	0.0496979	2.38994	0.0570727	0.0528172	0.0168512	0.23079	22097683	promoter-TSS (ENSSSCT00000017106)	-914	ENSSSCT00000017106	LYPD1
chr15	22097698	22097699	0.8571	0.4815	0.7143	1	0.7	0.2778	ENSSSCG00000015706	0.118556	0.0448441	LYPD1	7.26865	11.1247	-0.614008	7.19e-06	four	6599554	0.550636	0.432081	0.118556	0.0448441	2.64373	0.0785148	0.106977	0.00819991	0.147493	22097699	promoter-TSS (ENSSSCT00000017106)	-898	ENSSSCT00000017106	LYPD1
chr15	22097702	22097703	0.8667	0.6786	0.7059	1	1	0.2	ENSSSCG00000015706	0.112301	0.0444009	LYPD1	7.26865	11.1247	-0.614008	7.19e-06	four	6599555	0.545156	0.432856	0.112301	0.0444009	2.52924	0.04334	0.277434	0.0114309	0.182035	22097703	promoter-TSS (ENSSSCT00000017106)	-894	ENSSSCT00000017106	LYPD1
chr15	22097716	22097717	1	0.5455	0.9286	0.8333	0.8182	0.6316	ENSSSCG00000015706	0.109465	0.0438855	LYPD1	7.26865	11.1247	-0.614008	7.19e-06	four	6599556	0.543486	0.434021	0.109465	0.0438855	2.49433	0.0510763	0.116797	0.0126195	0.193603	22097717	promoter-TSS (ENSSSCT00000017106)	-880	ENSSSCT00000017106	LYPD1
chr15	22097720	22097721	1	1	0.9	0.7333	0.5333	0.4211	ENSSSCG00000015706	0.109465	0.0461942	LYPD1	7.26865	11.1247	-0.614008	7.19e-06	four	6599557	0.543486	0.434021	0.109465	0.0461942	2.36967	0.0485447	0.0412654	0.017804	0.238501	22097721	promoter-TSS (ENSSSCT00000017106)	-876	ENSSSCT00000017106	LYPD1
chr15	22097722	22097723	1	0.6842	0.7	0.8095	0.9375	0.3158	ENSSSCG00000015706	0.109465	0.045781	LYPD1	7.26865	11.1247	-0.614008	7.19e-06	four	6599558	0.543486	0.434021	0.109465	0.045781	2.39106	0.0504079	0.0484452	0.0167999	0.230372	22097723	promoter-TSS (ENSSSCT00000017106)	-874	ENSSSCT00000017106	LYPD1
chr15	22097743	22097744	0.9091	0.72	0.4286	0.8182	0.9167	0.2	ENSSSCG00000015706	0.105107	0.0323997	LYPD1	7.26865	11.1247	-0.614008	7.19e-06	four	6599559	0.539819	0.434712	0.105107	0.0323997	3.24406	0.312828	0.172406	0.00117839	0.0391138	22097744	promoter-TSS (ENSSSCT00000017106)	-853	ENSSSCT00000017106	LYPD1
chr15	22097751	22097752	0.9091	0.8824	0.5	0.9167	0.9091	0.375	ENSSSCG00000015706	0.106098	0.0295514	LYPD1	7.26865	11.1247	-0.614008	7.19e-06	four	6599560	0.538159	0.432062	0.106098	0.0295514	3.59027	0.147577	0.0779985	0.000330341	0.0153874	22097752	promoter-TSS (ENSSSCT00000017106)	-845	ENSSSCT00000017106	LYPD1
chr15	22097761	22097762	1	0.4762	0.8889	0.9545	0.9231	0.2667	ENSSSCG00000015706	0.103185	0.0360463	LYPD1	7.26865	11.1247	-0.614008	7.19e-06	four	6599561	0.536759	0.433574	0.103185	0.0360463	2.86257	0.0596529	0.0565681	0.00420222	0.0949672	22097762	promoter-TSS (ENSSSCT00000017106)	-835	ENSSSCT00000017106	LYPD1
chr15	22097775	22097776	1	1	1	0.8276	0.9	0.2857	ENSSSCG00000015706	0.108088	0.0329211	LYPD1	7.26865	11.1247	-0.614008	7.19e-06	four	6599562	0.537118	0.42903	0.108088	0.0329211	3.28325	0.133853	0.0606205	0.00102616	0.0354295	22097776	promoter-TSS (ENSSSCT00000017106)	-821	ENSSSCT00000017106	LYPD1
chr15	22097796	22097797	1	0.9583	0.75	0.6667	1	0.0833	ENSSSCG00000015706	0.111924	0.0277194	LYPD1	7.26865	11.1247	-0.614008	7.19e-06	four	6599563	0.539625	0.427702	0.111924	0.0277194	4.03774	0.169597	0.108572	5.4e-05	0.00384008	22097797	promoter-TSS (ENSSSCT00000017106)	-800	ENSSSCT00000017106	LYPD1
chr15	22097842	22097843	0	1	0.875	1	0.8095	0.2	ENSSSCG00000015706	0.114347	0.0202013	LYPD1	7.26865	11.1247	-0.614008	7.19e-06	four	6599564	0.523754	0.409407	0.114347	0.0202013	5.66036	0.0746312	0.074703	1.51e-08	4.6e-06	22097843	promoter-TSS (ENSSSCT00000017106)	-754	ENSSSCT00000017106	LYPD1
chr15	71423073	71423074	1	0.8235	0.9167	0.1379	0.6667	1	ENSSSCG00000015873	0.228172	0.147348	ACVR1C	5.21369	7.3885	-0.502975	0.00179138	four	6857950	0.74939	0.521218	0.228172	0.147348	1.54852	0.146737	0.629807	0.121496	0.633457	71423074	promoter-TSS (ENSSSCT00000017284)	-557	ENSSSCT00000017284	ACVR1C	activin receptor type-1C
chr15	71423145	71423146	1	0.8462	0.8462	0.8	0.9167	0	ENSSSCG00000015873	0.228172	0.151374	ACVR1C	5.21369	7.3885	-0.502975	0.00179138	four	6857951	0.74939	0.521218	0.228172	0.151374	1.50734	0.561385	0.396119	0.131723	0.653995	71423146	promoter-TSS (ENSSSCT00000017284)	-629	ENSSSCT00000017284	ACVR1C	activin receptor type-1C
chr15	96520462	96520463	0.4286	0.8077	0.5789	1	0.9375	0.6875	ENSSSCG00000016009	0.194691	0.0917614	ITGA4	1.79117	4.82693	-1.4302	4.25e-33	four	6996760	0.809204	0.614512	0.194691	0.0917614	2.12172	0.0490978	0.0513767	0.0338617	0.344173	96520463	promoter-TSS (ENSSSCT00000017431)	-671	ENSSSCT00000017431	ITGA4	integrin alpha 4
chr15	96520536	96520537	0.3529	0.85	0.4375	0.75	0.6111	0.2857	ENSSSCG00000016009	0.254531	0.0758869	ITGA4	1.79117	4.82693	-1.4302	4.25e-33	four	6996761	0.745311	0.49078	0.254531	0.0758869	3.35408	0.153464	0.066851	0.000796284	0.0294727	96520537	promoter-TSS (ENSSSCT00000017431)	-597	ENSSSCT00000017431	ITGA4	integrin alpha 4
chr15	96520571	96520572	0.3636	0.7632	0.75	1	0.9474	0.3077	ENSSSCG00000016009	0.213562	0.0824617	ITGA4	1.79117	4.82693	-1.4302	4.25e-33	four	6996762	0.670807	0.457246	0.213562	0.0824617	2.58983	0.0513048	0.071638	0.00960237	0.163157	96520572	promoter-TSS (ENSSSCT00000017431)	-562	ENSSSCT00000017431	ITGA4	integrin alpha 4
chr16	67407578	67407579	1	0.6364	0.7647	1	1	0.2778	ENSSSCG00000017029	0.21533	0.120406	GABRB2	92.7923	137.789	-0.570389	8.99e-17	four	7807603	0.69042	0.475089	0.21533	0.120406	1.78837	0.0575969	0.0567161	0.0737163	0.510558	67407579	promoter-TSS (ENSSSCT00000018541)	-480	ENSSSCT00000018541	GABRB2
chr17	4173006	4173007	0.625	1	0.6364	1	0.9655	0.9375	ENSSSCG00000006979	0.100613	0.0769204	MSR1	0.656275	2.96935	-2.17777	8.06e-18	four	8010181	0.958487	0.857874	0.100613	0.0769204	1.30801	0.0403558	0.0433329	0.190869	0.746473	4173007	promoter-TSS (ENSSSCT00000036427)	-807	ENSSSCT00000036427	MSR1	macrophage scavenger receptor 1
chr17	45198299	45198300	0.7647	0.9375	0.5	1	0.6875	0.6364	ENSSSCG00000007317	0.208651	0.139064	DLGAP4	6.19254	9.19617	-0.570502	1.5e-05	four	8293879	0.97338	0.764728	0.208651	0.139064	1.5004	0.0779509	0.0617411	0.133511	0.657424	45198300	promoter-TSS (ENSSSCT00000008007)	-343	ENSSSCT00000008007	DLGAP4
chr17	58697063	58697064	0.8571	1	0.7	1	0.8947	1	ENSSSCG00000007472	0.104761	0.0694648	BCAS4	7.64944	11.5687	-0.596801	6.2e-06	four	8414089	0.943836	0.839075	0.104761	0.0694648	1.50811	0.100955	0.234095	0.131526	0.653615	58697064	promoter-TSS (ENSSSCT00000036568)	-722	ENSSSCT00000036568	BCAS4
chr17	58697556	58697557	0.4706	1	0.8	0.8421	0.9167	0.5	ENSSSCG00000007472	0.113341	0.0687636	BCAS4	7.64944	11.5687	-0.596801	6.2e-06	four	8414096	0.680849	0.567508	0.113341	0.0687636	1.64827	0.281023	0.0906843	0.0992965	0.582875	58697557	promoter-TSS (ENSSSCT00000036568)	-229	ENSSSCT00000036568	BCAS4
chr17	58697579	58697580	0.8421	0.8889	1	0.963	0.8065	0.5385	ENSSSCG00000007472	0.113341	0.0682421	BCAS4	7.64944	11.5687	-0.596801	6.2e-06	four	8414097	0.680849	0.567508	0.113341	0.0682421	1.66087	0.330961	0.0635205	0.0967394	0.576434	58697580	promoter-TSS (ENSSSCT00000036568)	-206	ENSSSCT00000036568	BCAS4
chr17	58697581	58697582	1	1	1	0.9375	0.9231	0.3846	ENSSSCG00000007472	0.113341	0.0698312	BCAS4	7.64944	11.5687	-0.596801	6.2e-06	four	8414098	0.680849	0.567508	0.113341	0.0698312	1.62307	0.278286	0.0803412	0.104574	0.59577	58697582	promoter-TSS (ENSSSCT00000036568)	-204	ENSSSCT00000036568	BCAS4
chr17	58697585	58697586	1	0.8889	1	1	0.4107	0.5714	ENSSSCG00000007472	0.113341	0.0683594	BCAS4	7.64944	11.5687	-0.596801	6.2e-06	four	8414099	0.680849	0.567508	0.113341	0.0683594	1.65802	0.302167	0.0829658	0.0973135	0.577903	58697586	promoter-TSS (ENSSSCT00000036568)	-200	ENSSSCT00000036568	BCAS4
chr17	58697603	58697604	0.9333	1	0.8	1	0.6825	0.5	ENSSSCG00000007472	0.113341	0.0744534	BCAS4	7.64944	11.5687	-0.596801	6.2e-06	four	8414100	0.680849	0.567508	0.113341	0.0744534	1.52231	0.253762	0.0661226	0.127931	0.646516	58697604	promoter-TSS (ENSSSCT00000036568)	-182	ENSSSCT00000036568	BCAS4
chr17	58697608	58697609	0.8	1	0.8462	0.7647	0.9178	0.5625	ENSSSCG00000007472	0.113341	0.0948446	BCAS4	7.64944	11.5687	-0.596801	6.2e-06	four	8414101	0.680849	0.567508	0.113341	0.0948446	1.19502	0.0625505	0.058532	0.232079	0.793454	58697609	promoter-TSS (ENSSSCT00000036568)	-177	ENSSSCT00000036568	BCAS4
chr17	61012230	61012231	1	0.8125	0	1	0	0.6	ENSSSCG00000007482	0.153134	0.0584805	TSHZ2	1.22797	2.29988	-0.90529	1.33e-16	four	8449024	0.678611	0.525477	0.153134	0.0584805	2.61855	0.0616844	0.0595118	0.00883052	0.154697	61012231	promoter-TSS (ENSSSCT00000034354)	64	ENSSSCT00000034354	TSHZ2
chr17	65146660	65146661	0.8636	0.8889	1	0	1	0.6	ENSSSCG00000007508	0.106015	0.0245755	ZBP1	1.21458	3.39395	-1.4825	1.4e-11	four	8513428	0.305889	0.199873	0.106015	0.0245755	4.31386	0.0662847	0.107737	1.6e-05	0.0014701	65146661	promoter-TSS (ENSSSCT00000008223)	23	ENSSSCT00000033018	ZBP1	Z-DNA binding protein 1
chr17	65146677	65146678	1	1	0.6667	0	1	0.7	ENSSSCG00000007508	0.106015	0.0290654	ZBP1	1.21458	3.39395	-1.4825	1.4e-11	four	8513430	0.305889	0.199873	0.106015	0.0290654	3.64748	0.053351	0.169887	0.000264828	0.0130382	65146678	promoter-TSS (ENSSSCT00000008223)	6	ENSSSCT00000033018	ZBP1	Z-DNA binding protein 1
chr17	65146753	65146754	1	0.9231	0.7812	0.1667	0.625	0.2273	ENSSSCG00000007508	0.106533	0.0479489	ZBP1	1.21458	3.39395	-1.4825	1.4e-11	four	8513431	0.309348	0.202815	0.106533	0.0479489	2.2218	0.0667289	0.0405953	0.0262967	0.299107	65146754	promoter-TSS (ENSSSCT00000008223)	-41	ENSSSCT00000008223	ZBP1	Z-DNA binding protein 1
chr17	65146759	65146760	0.8	0	0.7619	0	1	0.5238	ENSSSCG00000007508	0.106533	0.0463284	ZBP1	1.21458	3.39395	-1.4825	1.4e-11	four	8513432	0.309348	0.202815	0.106533	0.0463284	2.29952	0.0511896	0.0879849	0.0214756	0.266339	65146760	promoter-TSS (ENSSSCT00000008223)	-47	ENSSSCT00000008223	ZBP1	Z-DNA binding protein 1
chr17	65146772	65146773	1	1	0.7778	0	1	0.2174	ENSSSCG00000007508	0.106774	0.0493947	ZBP1	1.21458	3.39395	-1.4825	1.4e-11	four	8513433	0.316272	0.209498	0.106774	0.0493947	2.16166	0.0840281	0.0524286	0.0306445	0.325825	65146773	promoter-TSS (ENSSSCT00000008223)	-60	ENSSSCT00000008223	ZBP1	Z-DNA binding protein 1
chr17	65146830	65146831	1	1	0.7143	0	0.5909	0.2571	ENSSSCG00000007508	0.106774	0.0602421	ZBP1	1.21458	3.39395	-1.4825	1.4e-11	four	8513434	0.316272	0.209498	0.106774	0.0602421	1.77242	0.0415443	0.0393813	0.0763242	0.518851	65146831	promoter-TSS (ENSSSCT00000008223)	-118	ENSSSCT00000008223	ZBP1	Z-DNA binding protein 1
chr17	65146856	65146857	0.9167	1	0.8889	0	0.9167	0.125	ENSSSCG00000007508	0.106774	0.0573625	ZBP1	1.21458	3.39395	-1.4825	1.4e-11	four	8513435	0.316272	0.209498	0.106774	0.0573625	1.8614	0.0445588	0.0500305	0.062688	0.47272	65146857	promoter-TSS (ENSSSCT00000008223)	-144	ENSSSCT00000008223	ZBP1	Z-DNA binding protein 1
chr17	65146874	65146875	0.9167	1	0.6	0	0.913	0	ENSSSCG00000007508	0.106774	0.0501632	ZBP1	1.21458	3.39395	-1.4825	1.4e-11	four	8513436	0.316272	0.209498	0.106774	0.0501632	2.12854	0.0410213	0.109754	0.0332923	0.341007	65146875	promoter-TSS (ENSSSCT00000008223)	-162	ENSSSCT00000008223	ZBP1	Z-DNA binding protein 1
chr17	65146892	65146893	0.8947	1	0.7895	0	0.8462	0.0476	ENSSSCG00000007508	0.10812	0.0464296	ZBP1	1.21458	3.39395	-1.4825	1.4e-11	four	8513437	0.316048	0.207928	0.10812	0.0464296	2.32869	0.0452454	0.0971406	0.0198755	0.25453	65146893	promoter-TSS (ENSSSCT00000008223)	-180	ENSSSCT00000008223	ZBP1	Z-DNA binding protein 1
chr1	81996946	81996947	1	0.5455	0.8	0.6316	1	0	ENSSSCG00000004371	0.124996	0.071616	AIM1	0.368188	0.572226	-0.636142	0.000399868	four	529892	0.220838	0.0958417	0.124996	0.071616	1.74537	0.182266	0.0844628	0.0809205	0.53285	81996947	promoter-TSS (ENSSSCT00000032657)	-233	ENSSSCT00000032657
chr1	81996959	81996960	0.5625	0.2667	0.9091	1	1	0	ENSSSCG00000004371	0.133995	0.0614881	AIM1	0.368188	0.572226	-0.636142	0.000399868	four	529893	0.229246	0.0952506	0.133995	0.0614881	2.1792	0.12607	0.09295	0.0293165	0.317916	81996960	promoter-TSS (ENSSSCT00000032657)	-220	ENSSSCT00000032657
chr1	81996961	81996962	0.6667	0	0.8889	0.7097	1	0	ENSSSCG00000004371	0.133995	0.0614881	AIM1	0.368188	0.572226	-0.636142	0.000399868	four	529894	0.229246	0.0952506	0.133995	0.0614881	2.1792	0.12607	0.09295	0.0293165	0.317916	81996962	promoter-TSS (ENSSSCT00000032657)	-218	ENSSSCT00000032657
chr1	81996964	81996965	0.9091	0.8529	0.9524	0.9231	0.4545	0	ENSSSCG00000004371	0.133995	0.0610672	AIM1	0.368188	0.572226	-0.636142	0.000399868	four	529895	0.229246	0.0952506	0.133995	0.0610672	2.19422	0.120654	0.09295	0.0282193	0.31123	81996965	promoter-TSS (ENSSSCT00000032657)	-215	ENSSSCT00000032657
chr1	81996977	81996978	0.2632	0.4667	1	0.9583	1	0	ENSSSCG00000004371	0.124119	0.0554906	AIM1	0.368188	0.572226	-0.636142	0.000399868	four	529896	0.219154	0.0950351	0.124119	0.0554906	2.23676	0.107805	0.0877629	0.0253019	0.292662	81996978	promoter-TSS (ENSSSCT00000032657)	-202	ENSSSCT00000032657
chr1	81996983	81996984	0.2353	0.9	1	0.85	0.9	0	ENSSSCG00000004371	0.124119	0.0256909	AIM1	0.368188	0.572226	-0.636142	0.000399868	four	529898	0.219154	0.0950351	0.124119	0.0256909	4.83125	0.0746312	0.0877629	1.36e-06	0.000198679	81996984	promoter-TSS (ENSSSCT00000032657)	-196	ENSSSCT00000032657
chr1	81996988	81996989	0.8	0.8	0.5455	0.9333	0.7826	0	ENSSSCG00000004371	0.124119	0.0256909	AIM1	0.368188	0.572226	-0.636142	0.000399868	four	529900	0.219154	0.0950351	0.124119	0.0256909	4.83125	0.0746312	0.0877629	1.36e-06	0.000198679	81996989	promoter-TSS (ENSSSCT00000032657)	-191	ENSSSCT00000032657
chr1	81996994	81996995	1	0.4286	1	0.7368	0.7143	0	ENSSSCG00000004371	0.124119	0.029482	AIM1	0.368188	0.572226	-0.636142	0.000399868	four	529902	0.219154	0.0950351	0.124119	0.029482	4.21001	0.0746312	0.102056	2.55e-05	0.00213047	81996995	promoter-TSS (ENSSSCT00000032657)	-185	ENSSSCT00000032657
chr1	81996997	81996998	0.9091	0.1333	0.8235	1	1	0	ENSSSCG00000004371	0.120602	0.0288711	AIM1	0.368188	0.572226	-0.636142	0.000399868	four	529904	0.214206	0.0936041	0.120602	0.0288711	4.17725	0.0746312	0.105659	2.95e-05	0.00238924	81996998	promoter-TSS (ENSSSCT00000032657)	-182	ENSSSCT00000032657
chr1	81997001	81997002	1	1	0.8125	0.4545	1	0	ENSSSCG00000004371	0.116282	0.0310125	AIM1	0.368188	0.572226	-0.636142	0.000399868	four	529906	0.209758	0.0934758	0.116282	0.0310125	3.74953	0.0746312	0.122153	0.000177166	0.00960859	81997002	promoter-TSS (ENSSSCT00000032657)	-178	ENSSSCT00000032657
chr1	82003741	82003742	0.8	0.8333	0.8125	0.8667	1	0.7273	ENSSSCG00000004371	0.118961	0.078546	AIM1	0.368188	0.572226	-0.636142	0.000399868	four	530078	0.671365	0.552404	0.118961	0.078546	1.51454	0.0712777	0.0586628	0.129888	0.650398	82003742	promoter-TSS (ENSSSCT00000004833)	-464	ENSSSCT00000004833
chr1	82028799	82028800	0.9916	0.4545	0.9	0.8235	0.6	0.7273	ENSSSCG00000004371	0.213024	0.0971114	AIM1	0.368188	0.572226	-0.636142	0.000399868	four	530383	0.865751	0.652727	0.213024	0.0971114	2.19361	0.0514266	0.639347	0.0282635	0.311504	82028800	promoter-TSS (ENSSSCT00000033563)	-958	ENSSSCT00000033563
chr1	82029638	82029639	1	0	1	0.9	1	0.6667	ENSSSCG00000004371	0.125023	0.0923747	AIM1	0.368188	0.572226	-0.636142	0.000399868	four	530391	0.941479	0.816456	0.125023	0.0923747	1.35343	0.0691057	0.0552068	0.175918	0.726369	82029639	promoter-TSS (ENSSSCT00000033563)	-119	ENSSSCT00000033563
chr18	26579234	26579235	0.5455	1	1	1	1	0	ENSSSCG00000016613	0.108668	0.0357973	AASS	4.75708	7.18773	-0.595462	8.02e-07	four	8887093	0.286675	0.178007	0.108668	0.0357973	3.03564	0.0746312	0.103834	0.00240022	0.064679	26579235	promoter-TSS (ENSSSCT00000018087)	-189	ENSSSCT00000018087	AASS	alpha-aminoadipic semialdehyde synthase
chr18	26579261	26579262	0	1	0.9091	1	1	0.1333	ENSSSCG00000016613	0.108668	0.0771788	AASS	4.75708	7.18773	-0.595462	8.02e-07	four	8887094	0.286675	0.178007	0.108668	0.0771788	1.408	0.154674	0.0685027	0.15913	0.701503	26579262	promoter-TSS (ENSSSCT00000018087)	-162	ENSSSCT00000018087	AASS	alpha-aminoadipic semialdehyde synthase
chr18	26579302	26579303	1	1	0.8667	0.9474	0.8182	0	ENSSSCG00000016613	0.103749	0.057151	AASS	4.75708	7.18773	-0.595462	8.02e-07	four	8887095	0.276101	0.172352	0.103749	0.057151	1.81535	0.509954	0.174052	0.0694708	0.496562	26579303	promoter-TSS (ENSSSCT00000018087)	-121	ENSSSCT00000018087	AASS	alpha-aminoadipic semialdehyde synthase
chr18	26579305	26579306	1	0.9286	0.75	1	0.6364	0	ENSSSCG00000016613	0.103749	0.0575949	AASS	4.75708	7.18773	-0.595462	8.02e-07	four	8887096	0.276101	0.172352	0.103749	0.0575949	1.80136	0.483752	0.187869	0.0716469	0.503838	26579306	promoter-TSS (ENSSSCT00000018087)	-118	ENSSSCT00000018087	AASS	alpha-aminoadipic semialdehyde synthase
chr18	26579341	26579342	1	0.9375	0.9048	1	0.8	0	ENSSSCG00000016613	0.113835	0.0279105	AASS	4.75708	7.18773	-0.595462	8.02e-07	four	8887097	0.222166	0.108331	0.113835	0.0279105	4.07855	0.0746312	0.114033	4.53e-05	0.00334825	26579342	promoter-TSS (ENSSSCT00000018087)	-82	ENSSSCT00000018087	AASS	alpha-aminoadipic semialdehyde synthase
chr1	83542434	83542435	0.8	0.7	1	0.9231	0.625	0	ENSSSCG00000004384	0.106276	0.0430452	NR2E1	13.3152	19.4402	-0.545975	4.99e-12	four	540781	0.37107	0.264795	0.106276	0.0430452	2.46893	0.0839163	0.0988052	0.0135517	0.202274	83542435	promoter-TSS (ENSSSCT00000004846)	-823	ENSSSCT00000004846	NR2E1
chr1	83542444	83542445	0.75	0.7647	0.8	0.6364	0.8125	0.0909	ENSSSCG00000004384	0.106276	0.0441968	NR2E1	13.3152	19.4402	-0.545975	4.99e-12	four	540783	0.37107	0.264795	0.106276	0.0441968	2.4046	0.0839163	0.0700805	0.0161903	0.225292	83542445	promoter-TSS (ENSSSCT00000004846)	-813	ENSSSCT00000004846	NR2E1
chr1	83542446	83542447	0.8333	0.5714	0.5	0.7692	0.3846	0.1667	ENSSSCG00000004384	0.106276	0.0449642	NR2E1	13.3152	19.4402	-0.545975	4.99e-12	four	540785	0.37107	0.264795	0.106276	0.0449642	2.36356	0.0594439	0.0827439	0.0181003	0.24086	83542447	promoter-TSS (ENSSSCT00000004846)	-811	ENSSSCT00000004846	NR2E1
chr1	83542462	83542463	0.7895	0.7333	0.8	0.6429	0.7273	0.1667	ENSSSCG00000004384	0.120102	0.0481393	NR2E1	13.3152	19.4402	-0.545975	4.99e-12	four	540787	0.390959	0.270857	0.120102	0.0481393	2.49489	0.0669001	0.158666	0.0125997	0.193422	83542463	promoter-TSS (ENSSSCT00000004846)	-795	ENSSSCT00000004846	NR2E1
chr1	83542469	83542470	0	0.6875	1	0.6364	0.9167	0.3333	ENSSSCG00000004384	0.12841	0.0521614	NR2E1	13.3152	19.4402	-0.545975	4.99e-12	four	540789	0.408988	0.280578	0.12841	0.0521614	2.46177	0.0693404	0.145475	0.0138252	0.204756	83542470	promoter-TSS (ENSSSCT00000004846)	-788	ENSSSCT00000004846	NR2E1
chr1	83542497	83542498	1	0.75	0.9	0.8	1	0.1	ENSSSCG00000004384	0.135372	0.0530161	NR2E1	13.3152	19.4402	-0.545975	4.99e-12	four	540791	0.421076	0.285704	0.135372	0.0530161	2.55341	0.0582289	0.0606795	0.0106672	0.174318	83542498	promoter-TSS (ENSSSCT00000004846)	-760	ENSSSCT00000004846	NR2E1
chr1	83543207	83543208	1	0.6364	0.3636	0.6875	1	0.3889	ENSSSCG00000004384	0.117771	0.040414	NR2E1	13.3152	19.4402	-0.545975	4.99e-12	four	540837	0.482262	0.364491	0.117771	0.040414	2.91412	0.146417	0.0593921	0.00356696	0.0849782	83543208	promoter-TSS (ENSSSCT00000004846)	-50	ENSSSCT00000004846	NR2E1
chr1	83543213	83543214	0.8824	0.6471	0.3333	0.5714	0.6364	0.15	ENSSSCG00000004384	0.121955	0.0463667	NR2E1	13.3152	19.4402	-0.545975	4.99e-12	four	540838	0.491931	0.369976	0.121955	0.0463667	2.63023	0.0584602	0.0887447	0.00853279	0.151317	83543214	promoter-TSS (ENSSSCT00000004846)	-44	ENSSSCT00000004846	NR2E1
chr1	83543234	83543235	1	0.7333	0.8462	0.75	0.7692	0.1333	ENSSSCG00000004384	0.121955	0.0537718	NR2E1	13.3152	19.4402	-0.545975	4.99e-12	four	540839	0.491931	0.369976	0.121955	0.0537718	2.26801	0.0399467	0.0666604	0.0233289	0.279387	83543235	promoter-TSS (ENSSSCT00000004846)	-23	ENSSSCT00000004846	NR2E1
chr1	83543301	83543302	1	0.75	0	0.8	1	0.2927	ENSSSCG00000004384	0.137002	0.0630026	NR2E1	13.3152	19.4402	-0.545975	4.99e-12	four	540840	0.520552	0.38355	0.137002	0.0630026	2.17455	0.0444841	0.0366281	0.0296637	0.32	83543302	promoter-TSS (ENSSSCT00000004846)	44	ENSSSCT00000004846	NR2E1
chr1	83543318	83543319	0.9091	0.8667	0.8	0.8571	0.8824	0.35	ENSSSCG00000004384	0.137002	0.0637894	NR2E1	13.3152	19.4402	-0.545975	4.99e-12	four	540841	0.520552	0.38355	0.137002	0.0637894	2.14773	0.0445128	0.0288721	0.0317353	0.332163	83543319	promoter-TSS (ENSSSCT00000004846)	61	ENSSSCT00000004846	NR2E1
chr1	83543338	83543339	1	0.8	1	0.8571	1	0.4	ENSSSCG00000004384	0.137002	0.0610031	NR2E1	13.3152	19.4402	-0.545975	4.99e-12	four	540842	0.520552	0.38355	0.137002	0.0610031	2.24582	0.0424925	0.0317891	0.0247152	0.288809	83543339	promoter-TSS (ENSSSCT00000004846)	81	ENSSSCT00000004846	NR2E1
chr1	83543354	83543355	1	0.5	0.8182	0.7619	0.8889	0.2667	ENSSSCG00000004384	0.139192	0.0557372	NR2E1	13.3152	19.4402	-0.545975	4.99e-12	four	540843	0.51521	0.376018	0.139192	0.0557372	2.49729	0.0398632	0.0385714	0.0125146	0.192606	83543355	promoter-TSS (ENSSSCT00000004846)	97	ENSSSCT00000004846	NR2E1
chr18	47966701	47966702	0.6	0	1	0.7273	0.9286	0.4167	ENSSSCG00000016688	0.173468	0.0532083	CPVL	10.3894	16.2173	-0.642429	6.55e-06	four	9015570	0.822221	0.648753	0.173468	0.0532083	3.26017	0.118183	0.127797	0.00111344	0.0375633	47966702	promoter-TSS (ENSSSCT00000018169)	-964	ENSSSCT00000018169	CPVL
chr18	47966713	47966714	0.5667	0	0.8	0.5854	0.5294	0.25	ENSSSCG00000016688	0.173468	0.0476537	CPVL	10.3894	16.2173	-0.642429	6.55e-06	four	9015572	0.822221	0.648753	0.173468	0.0476537	3.64019	0.110903	0.246435	0.000272441	0.0133192	47966714	promoter-TSS (ENSSSCT00000018169)	-952	ENSSSCT00000018169	CPVL
chr2	10245669	10245670	0.7273	1	0.9286	0.3529	0.9615	0.8571	ENSSSCG00000013111	0.112328	0.0425736	CD6	0.193931	0.379503	-0.968563	0.0318867	four	9345172	0.922993	0.810666	0.112328	0.0425736	2.63843	0.0746312	0.0902902	0.00832902	0.148994	10245670	promoter-TSS (ENSSSCT00000033289)	-483	ENSSSCT00000033289	CD6	CD6 antigen
chr2	10245724	10245725	0.8	1	1	0.875	0.8261	0.8462	ENSSSCG00000013111	0.118656	0.0797122	CD6	0.193931	0.379503	-0.968563	0.0318867	four	9345173	0.917267	0.798611	0.118656	0.0797122	1.48856	0.0863345	0.0475711	0.136603	0.663159	10245725	promoter-TSS (ENSSSCT00000033289)	-538	ENSSSCT00000033289	CD6	CD6 antigen
chr2	10330185	10330186	0.7895	0.8333	1	0.5294	0.8333	0.6923	ENSSSCG00000013111	0.176452	0.0681742	CD6	0.193931	0.379503	-0.968563	0.0318867	four	9346339	0.923997	0.747545	0.176452	0.0681742	2.58825	0.0831595	0.0659421	0.00964647	0.163633	10330186	promoter-TSS (ENSSSCT00000014331)	-409	ENSSSCT00000036628	CD6	CD6 antigen
chr2	10330199	10330200	0.9091	0.7333	1	1	1	0.8182	ENSSSCG00000013111	0.176452	0.0668617	CD6	0.193931	0.379503	-0.968563	0.0318867	four	9346340	0.923997	0.747545	0.176452	0.0668617	2.63906	0.0632824	0.0566275	0.00831365	0.148813	10330200	promoter-TSS (ENSSSCT00000014331)	-423	ENSSSCT00000036628	CD6	CD6 antigen
chr2	10366988	10366989	0.6667	0.7727	1	1	0.9	0.2273	ENSSSCG00000013114	0.101972	0.0788762	SLC15A3	0.998185	1.781	-0.835306	7.27e-07	four	9346801	0.39542	0.293448	0.101972	0.0788762	1.29281	0.338366	0.141602	0.196078	0.753066	10366989	promoter-TSS (ENSSSCT00000014334)	-261	ENSSSCT00000014334	SLC15A3
chr2	10367013	10367014	0.8182	1	0.9286	0.8333	0.7	0	ENSSSCG00000013114	0.101972	0.0765059	SLC15A3	0.998185	1.781	-0.835306	7.27e-07	four	9346802	0.39542	0.293448	0.101972	0.0765059	1.33286	0.105721	0.364482	0.182578	0.735514	10367014	promoter-TSS (ENSSSCT00000014334)	-286	ENSSSCT00000014334	SLC15A3
chr2	10367016	10367017	0.8333	0.5714	0.6739	0.8462	0.4667	0.2667	ENSSSCG00000013114	0.101972	0.0864976	SLC15A3	0.998185	1.781	-0.835306	7.27e-07	four	9346803	0.39542	0.293448	0.101972	0.0864976	1.1789	0.105656	0.094719	0.23844	0.79976	10367017	promoter-TSS (ENSSSCT00000014334)	-289	ENSSSCT00000014334	SLC15A3
chr2	10492763	10492764	0.875	1	1	0.8023	0.9	0.4	ENSSSCG00000013106	0.153588	0.0854507	PTGDR2	2.09431	4.23854	-1.01709	0.0468752	four	9348552	0.686806	0.533218	0.153588	0.0854507	1.79739	0.120682	0.161797	0.0722742	0.505908	10492764	promoter-TSS (ENSSSCT00000014326)	-778	ENSSSCT00000014326	PTGDR2
chr2	299514	299515	1	1	0.9167	0.8	1	0	ENSSSCG00000012853	0.152062	0.0312174	IRF7	1.09968	2.03176	-0.885646	0.00119045	four	9205243	0.28648	0.134419	0.152062	0.0312174	4.87105	0.0746312	0.144233	1.11e-06	0.000168503	299515	promoter-TSS (ENSSSCT00000014049)	71	ENSSSCT00000035232	IRF7	interferon regulatory factor 7
chr2	3748467	3748468	1	0.8571	1	0.9231	0.8519	0	ENSSSCG00000012903	0.249987	0.032541	PITPNM1	15.2385	21.6179	-0.504504	1.75e-09	four	9265937	0.382921	0.132934	0.249987	0.032541	7.68223	0.0746312	0.0925517	1.55e-14	2.69e-11	3748468	promoter-TSS (ENSSSCT00000014106)	-111	ENSSSCT00000014106	PITPNM1
chr2	3748476	3748477	0.9796	0.8621	1	1	1	0	ENSSSCG00000012903	0.250122	0.0358674	PITPNM1	15.2385	21.6179	-0.504504	1.75e-09	four	9265943	0.385922	0.135799	0.250122	0.0358674	6.97353	0.0746312	0.0656264	3.09e-12	2.92e-09	3748477	promoter-TSS (ENSSSCT00000014106)	-102	ENSSSCT00000014106	PITPNM1
chr2	3748485	3748486	0.9565	0.8095	0.9444	0.9643	0.9286	0	ENSSSCG00000012903	0.252695	0.0347003	PITPNM1	15.2385	21.6179	-0.504504	1.75e-09	four	9265945	0.388875	0.13618	0.252695	0.0347003	7.28222	0.0746312	0.148038	3.28e-13	4.03e-10	3748486	promoter-TSS (ENSSSCT00000014106)	-93	ENSSSCT00000014106	PITPNM1
chr2	3748491	3748492	0.9368	0.8	1	0.3333	0.9231	0	ENSSSCG00000012903	0.252695	0.0352162	PITPNM1	15.2385	21.6179	-0.504504	1.75e-09	four	9265946	0.388875	0.13618	0.252695	0.0352162	7.17555	0.0746312	0.0970433	7.2e-13	8.08e-10	3748492	promoter-TSS (ENSSSCT00000014106)	-87	ENSSSCT00000014106	PITPNM1
chr2	3748493	3748494	0.9759	0.8182	1	0.6364	1	0	ENSSSCG00000012903	0.252695	0.0358312	PITPNM1	15.2385	21.6179	-0.504504	1.75e-09	four	9265948	0.388875	0.13618	0.252695	0.0358312	7.05237	0.0746312	0.0686312	1.76e-12	1.77e-09	3748494	promoter-TSS (ENSSSCT00000014106)	-85	ENSSSCT00000014106	PITPNM1
chr2	3748495	3748496	0.9605	1	0.8947	0.95	0.9	0	ENSSSCG00000012903	0.252695	0.0348101	PITPNM1	15.2385	21.6179	-0.504504	1.75e-09	four	9265950	0.388875	0.13618	0.252695	0.0348101	7.25926	0.0746312	0.117208	3.89e-13	4.7e-10	3748496	promoter-TSS (ENSSSCT00000014106)	-83	ENSSSCT00000014106	PITPNM1
chr2	3748498	3748499	0.8889	1	0.8667	1	1	0	ENSSSCG00000012903	0.252695	0.0357301	PITPNM1	15.2385	21.6179	-0.504504	1.75e-09	four	9265952	0.388875	0.13618	0.252695	0.0357301	7.07232	0.0746312	0.0746346	1.52e-12	1.56e-09	3748499	promoter-TSS (ENSSSCT00000014106)	-80	ENSSSCT00000014106	PITPNM1
chr2	3748501	3748502	0.8333	0.1333	0.9091	0.9655	0.9	0	ENSSSCG00000012903	0.252695	0.0360775	PITPNM1	15.2385	21.6179	-0.504504	1.75e-09	four	9265954	0.388875	0.13618	0.252695	0.0360775	7.00423	0.0746312	0.0728397	2.48e-12	2.41e-09	3748502	promoter-TSS (ENSSSCT00000014106)	-77	ENSSSCT00000014106	PITPNM1
chr2	3748506	3748507	0.5135	0.75	0.875	0.8065	0.9545	0	ENSSSCG00000012903	0.252695	0.0357727	PITPNM1	15.2385	21.6179	-0.504504	1.75e-09	four	9265956	0.388875	0.13618	0.252695	0.0357727	7.06391	0.0746312	0.072104	1.62e-12	1.65e-09	3748507	promoter-TSS (ENSSSCT00000014106)	-72	ENSSSCT00000014106	PITPNM1
chr2	3748514	3748515	0.747	0.92	0.375	0.8737	1	0	ENSSSCG00000012903	0.252695	0.0358884	PITPNM1	15.2385	21.6179	-0.504504	1.75e-09	four	9265958	0.388875	0.13618	0.252695	0.0358884	7.04114	0.0746312	0.0742874	1.91e-12	1.91e-09	3748515	promoter-TSS (ENSSSCT00000014106)	-64	ENSSSCT00000014106	PITPNM1
chr2	3748518	3748519	0.9565	0.9091	0.6207	0.8043	0.875	0	ENSSSCG00000012903	0.252695	0.0359358	PITPNM1	15.2385	21.6179	-0.504504	1.75e-09	four	9265960	0.388875	0.13618	0.252695	0.0359358	7.03186	0.0746312	0.079218	2.04e-12	2.02e-09	3748519	promoter-TSS (ENSSSCT00000014106)	-60	ENSSSCT00000014106	PITPNM1
chr2	3748522	3748523	0.8205	0.9	0.8286	0.68	0.7778	0	ENSSSCG00000012903	0.252695	0.0347084	PITPNM1	15.2385	21.6179	-0.504504	1.75e-09	four	9265962	0.388875	0.13618	0.252695	0.0347084	7.28052	0.0746312	0.163891	3.33e-13	4.08e-10	3748523	promoter-TSS (ENSSSCT00000014106)	-56	ENSSSCT00000014106	PITPNM1
chr2	3748532	3748533	0.72	0.7143	0.9	0.7083	0.9286	0	ENSSSCG00000012903	0.252695	0.0357727	PITPNM1	15.2385	21.6179	-0.504504	1.75e-09	four	9265964	0.388875	0.13618	0.252695	0.0357727	7.06391	0.0746312	0.072104	1.62e-12	1.65e-09	3748533	promoter-TSS (ENSSSCT00000014106)	-46	ENSSSCT00000014106	PITPNM1
chr2	3748544	3748545	0.8636	1	1	0.7143	1	0	ENSSSCG00000012903	0.252695	0.0356524	PITPNM1	15.2385	21.6179	-0.504504	1.75e-09	four	9265966	0.388875	0.13618	0.252695	0.0356524	7.08776	0.0746312	0.0858512	1.36e-12	1.42e-09	3748545	promoter-TSS (ENSSSCT00000014106)	-34	ENSSSCT00000014106	PITPNM1
chr2	3748551	3748552	0.8824	0.7333	1	0.9231	1	0	ENSSSCG00000012903	0.252695	0.0365704	PITPNM1	15.2385	21.6179	-0.504504	1.75e-09	four	9265968	0.388875	0.13618	0.252695	0.0365704	6.90982	0.0746312	0.070327	4.85e-12	4.34e-09	3748552	promoter-TSS (ENSSSCT00000014106)	-27	ENSSSCT00000014106	PITPNM1
chr2	3748553	3748554	1	0.4615	0.75	0.931	0.7	0	ENSSSCG00000012903	0.252695	0.0358753	PITPNM1	15.2385	21.6179	-0.504504	1.75e-09	four	9265970	0.388875	0.13618	0.252695	0.0358753	7.0437	0.0746312	0.0832815	1.87e-12	1.87e-09	3748554	promoter-TSS (ENSSSCT00000014106)	-25	ENSSSCT00000014106	PITPNM1
chr2	3748555	3748556	0.5385	0.1429	0.8636	0.8333	0.8462	0	ENSSSCG00000012903	0.252695	0.0363511	PITPNM1	15.2385	21.6179	-0.504504	1.75e-09	four	9265972	0.388875	0.13618	0.252695	0.0363511	6.95152	0.0746312	0.0738994	3.61e-12	3.35e-09	3748556	promoter-TSS (ENSSSCT00000014106)	-23	ENSSSCT00000014106	PITPNM1
chr2	3748557	3748558	0.4545	0.5	0.8889	0.8571	0.8462	0.0714	ENSSSCG00000012903	0.252695	0.0877839	PITPNM1	15.2385	21.6179	-0.504504	1.75e-09	four	9265974	0.388875	0.13618	0.252695	0.0877839	2.87861	0.16456	0.0488817	0.00399436	0.0917708	3748558	promoter-TSS (ENSSSCT00000014106)	-21	ENSSSCT00000014106	PITPNM1
chr2	3748561	3748562	1	0.8333	0.9524	1	1	0	ENSSSCG00000012903	0.252695	0.087304	PITPNM1	15.2385	21.6179	-0.504504	1.75e-09	four	9265976	0.388875	0.13618	0.252695	0.087304	2.89443	0.16456	0.221727	0.00379849	0.088692	3748562	promoter-TSS (ENSSSCT00000014106)	-17	ENSSSCT00000014106	PITPNM1
chr2	3748569	3748570	0.75	0.875	0.9412	1	1	0	ENSSSCG00000012903	0.252695	0.086931	PITPNM1	15.2385	21.6179	-0.504504	1.75e-09	four	9265978	0.388875	0.13618	0.252695	0.086931	2.90685	0.180303	0.142539	0.00365089	0.0863319	3748570	promoter-TSS (ENSSSCT00000014106)	-9	ENSSSCT00000014106	PITPNM1
chr2	3748623	3748624	0.8824	0.5833	1	1	1	0	ENSSSCG00000012903	0.252695	0.159098	PITPNM1	15.2385	21.6179	-0.504504	1.75e-09	four	9265980	0.388875	0.13618	0.252695	0.159098	1.5883	0.148408	0.0684715	0.112219	0.613377	3748624	promoter-TSS (ENSSSCT00000014106)	45	ENSSSCT00000014106	PITPNM1
chr2	3748664	3748665	0.6	0.9	0.9091	0.8947	0.9167	0.0667	ENSSSCG00000012903	0.252695	0.159018	PITPNM1	15.2385	21.6179	-0.504504	1.75e-09	four	9265981	0.388875	0.13618	0.252695	0.159018	1.58909	0.144881	0.0963074	0.112039	0.612974	3748665	promoter-TSS (ENSSSCT00000014106)	86	ENSSSCT00000014106	PITPNM1
chr2	59213440	59213441	0.8889	0.8276	0.9375	0.5	0.8919	0	ENSSSCG00000013901	0.234747	0.0822115	IFI30	2.62335	5.48008	-1.06279	2.1e-05	four	9663410	0.305539	0.0707918	0.234747	0.0822115	2.8554	0.0855442	0.0855728	0.00429827	0.0964171	59213441	promoter-TSS (ENSSSCT00000015187)	-614	ENSSSCT00000015187	IFI30	interferon, gamma-inducible protein 30
chr2	59213448	59213449	1	0.8696	1	0.8571	0.9259	0	ENSSSCG00000013901	0.234747	0.0897281	IFI30	2.62335	5.48008	-1.06279	2.1e-05	four	9663411	0.305539	0.0707918	0.234747	0.0897281	2.6162	0.111657	0.0877127	0.0088914	0.15538	59213449	promoter-TSS (ENSSSCT00000015187)	-606	ENSSSCT00000015187	IFI30	interferon, gamma-inducible protein 30
chr2	59482627	59482628	0.875	1	0.5455	0.2222	0.6429	0.4	ENSSSCG00000013888	0.111458	0.0517189	JAK3	2.04289	3.8623	-0.918848	9.15e-17	four	9666469	0.507117	0.395659	0.111458	0.0517189	2.15508	0.12345	0.049411	0.0311557	0.328808	59482628	promoter-TSS (ENSSSCT00000032948)	-747	ENSSSCT00000032948	JAK3	Janus kinase 3
chr2	64178616	64178617	1	1	1	0	1	0.1781	ENSSSCG00000021675	0.111071	0.131303	EMR2	0	0.112964	#NAME?	0.0346125	four	9696901	0.364159	0.253088	0.111071	0.131303	0.845912	0.0365437	0.0296437	0.397602	0.903933	64178617	promoter-TSS (ENSSSCT00000035665)	-296	ENSSSCT00000034935	EMR2
chr2	64178808	64178809	0.9333	1	0.9167	0	0.8824	0.8333	ENSSSCG00000021675	0.116025	0.0188024	EMR2	0	0.112964	#NAME?	0.0346125	four	9696903	0.353601	0.237576	0.116025	0.0188024	6.17077	0.0746312	0.284062	6.8e-10	3.22e-07	64178809	promoter-TSS (ENSSSCT00000035665)	-104	ENSSSCT00000034935	EMR2
chr2	71842918	71842919	0.8571	0.7692	0.675	0.5625	0	0.3333	ENSSSCG00000013576	0.149761	0.103227	STXBP2	0.614068	1.88399	-1.61732	1.93e-07	four	9756934	0.434943	0.285182	0.149761	0.103227	1.45079	0.0687872	0.065602	0.146837	0.681345	71842919	promoter-TSS (ENSSSCT00000014828)	-432	ENSSSCT00000014828	STXBP2
chr2	71842983	71842984	0.6667	0.7857	0.2895	0.1111	0	0.6	ENSSSCG00000013576	0.173531	0.0852682	STXBP2	0.614068	1.88399	-1.61732	1.93e-07	four	9756935	0.428853	0.255322	0.173531	0.0852682	2.03512	0.175574	0.114856	0.0418393	0.385453	71842984	promoter-TSS (ENSSSCT00000014828)	-367	ENSSSCT00000014828	STXBP2
chr2	71843193	71843194	1	1	0.0625	0.2857	0	0	ENSSSCG00000013576	0.261842	0.0391509	STXBP2	0.614068	1.88399	-1.61732	1.93e-07	four	9756943	0.397332	0.13549	0.261842	0.0391509	6.68802	0.0746312	0.123498	2.26e-11	1.68e-08	71843194	promoter-TSS (ENSSSCT00000014828)	-157	ENSSSCT00000014828	STXBP2
chr2	71912524	71912525	1	1	1	0.7742	0	0.6923	ENSSSCG00000013581	0.225658	0.134213	PET100	5.40954	8.91253	-0.72033	0.0113999	four	9758261	0.868359	0.642701	0.225658	0.134213	1.68135	0.0595827	0.0581838	0.0926956	0.565929	71912525	promoter-TSS (ENSSSCT00000014834)	825	ENSSSCT00000014833	PET100
chr2	85722689	85722690	1	0.8519	0.6667	0.8824	0	0.1	ENSSSCG00000029710	0.105214	0.0535298	GCNT4	2.6904	4.79243	-0.832934	1.11e-09	four	9886099	0.282043	0.176829	0.105214	0.0535298	1.96552	0.0746312	0.0626505	0.0493539	0.419802	85722690	promoter-TSS (ENSSSCT00000028723)	-259	ENSSSCT00000028723	GCNT4	beta-1,6-N-acetylglucosaminyltransferase 4 [EC:2.4.1.-]
chr2	85722716	85722717	1	0.3	0.8182	0.8	0.8	0.0909	ENSSSCG00000029710	0.162866	0.0567986	GCNT4	2.6904	4.79243	-0.832934	1.11e-09	four	9886101	0.33495	0.172084	0.162866	0.0567986	2.86742	0.0746312	0.0633273	0.00413831	0.0939876	85722717	promoter-TSS (ENSSSCT00000028723)	-286	ENSSSCT00000028723	GCNT4	beta-1,6-N-acetylglucosaminyltransferase 4 [EC:2.4.1.-]
chr2	85722744	85722745	0.8	0.6	0.7273	0.9	0.4545	0	ENSSSCG00000029710	0.162866	0.0547257	GCNT4	2.6904	4.79243	-0.832934	1.11e-09	four	9886103	0.33495	0.172084	0.162866	0.0547257	2.97604	0.0746312	0.118398	0.00291998	0.0740731	85722745	promoter-TSS (ENSSSCT00000028723)	-314	ENSSSCT00000028723	GCNT4	beta-1,6-N-acetylglucosaminyltransferase 4 [EC:2.4.1.-]
chr2	85722757	85722758	0.8182	0.4615	0	1	0.875	0.1818	ENSSSCG00000029710	0.162866	0.0571389	GCNT4	2.6904	4.79243	-0.832934	1.11e-09	four	9886104	0.33495	0.172084	0.162866	0.0571389	2.85035	0.0746312	0.0567258	0.00436714	0.097458	85722758	promoter-TSS (ENSSSCT00000028723)	-327	ENSSSCT00000028723	GCNT4	beta-1,6-N-acetylglucosaminyltransferase 4 [EC:2.4.1.-]
chr2	85722772	85722773	0.8667	0.7273	0.7	0.8125	0.9565	0.2727	ENSSSCG00000029710	0.115376	0.0593611	GCNT4	2.6904	4.79243	-0.832934	1.11e-09	four	9886105	0.341502	0.226126	0.115376	0.0593611	1.94362	0.0746312	0.0576958	0.0519412	0.430775	85722773	promoter-TSS (ENSSSCT00000028723)	-342	ENSSSCT00000028723	GCNT4	beta-1,6-N-acetylglucosaminyltransferase 4 [EC:2.4.1.-]
chr2	85722793	85722794	0.9821	0.6429	0	0.2	1	0	ENSSSCG00000029710	0.115376	0.0550742	GCNT4	2.6904	4.79243	-0.832934	1.11e-09	four	9886106	0.341502	0.226126	0.115376	0.0550742	2.09491	0.0746312	0.136954	0.0361789	0.356785	85722794	promoter-TSS (ENSSSCT00000028723)	-363	ENSSSCT00000028723	GCNT4	beta-1,6-N-acetylglucosaminyltransferase 4 [EC:2.4.1.-]
chr2	85723181	85723182	1	0.8824	0.6364	0.6429	0.5789	0.7895	ENSSSCG00000029710	0.100937	0.088155	GCNT4	2.6904	4.79243	-0.832934	1.11e-09	four	9886112	0.890279	0.789342	0.100937	0.088155	1.14499	0.0782956	0.0373703	0.252213	0.812476	85723182	promoter-TSS (ENSSSCT00000028723)	-751	ENSSSCT00000028723	GCNT4	beta-1,6-N-acetylglucosaminyltransferase 4 [EC:2.4.1.-]
chr2	85723200	85723201	0.8	0.9	1	0.8235	0.9111	0.9048	ENSSSCG00000029710	0.100937	0.0796141	GCNT4	2.6904	4.79243	-0.832934	1.11e-09	four	9886114	0.890279	0.789342	0.100937	0.0796141	1.26782	0.0724032	0.0545599	0.204861	0.763759	85723201	promoter-TSS (ENSSSCT00000028723)	-770	ENSSSCT00000028723	GCNT4	beta-1,6-N-acetylglucosaminyltransferase 4 [EC:2.4.1.-]
chr2	85723216	85723217	1	0.7273	0.9286	0.8276	0.4286	1	ENSSSCG00000029710	0.100937	0.055106	GCNT4	2.6904	4.79243	-0.832934	1.11e-09	four	9886116	0.890279	0.789342	0.100937	0.055106	1.83168	0.0760307	0.235293	0.066999	0.488112	85723217	promoter-TSS (ENSSSCT00000028723)	-786	ENSSSCT00000028723	GCNT4	beta-1,6-N-acetylglucosaminyltransferase 4 [EC:2.4.1.-]
chr2	85723281	85723282	0.7692	0.9231	0.6538	0.5882	0.3158	0.8333	ENSSSCG00000029710	0.108126	0.039181	GCNT4	2.6904	4.79243	-0.832934	1.11e-09	four	9886118	0.891129	0.783002	0.108126	0.039181	2.75966	0.0746312	0.0578947	0.00578612	0.117564	85723282	promoter-TSS (ENSSSCT00000028723)	-851	ENSSSCT00000028723	GCNT4	beta-1,6-N-acetylglucosaminyltransferase 4 [EC:2.4.1.-]
chr2	9178781	9178782	0.0588	1	1	0.4615	0.8	0	ENSSSCG00000013073	0.374114	0.0680599	FADS3	2.84824	4.22516	-0.568935	0.000317462	four	9333508	0.458803	0.0846885	0.374114	0.0680599	5.49683	0.0746312	0.0848776	3.87e-08	1.02e-05	9178782	promoter-TSS (ENSSSCT00000014290)	-145	ENSSSCT00000014290	FADS3
chr2	9178806	9178807	0	1	1	0.9277	1	0	ENSSSCG00000013073	0.374114	0.197614	FADS3	2.84824	4.22516	-0.568935	0.000317462	four	9333509	0.458803	0.0846885	0.374114	0.197614	1.89315	0.175248	0.091127	0.0583373	0.456385	9178807	promoter-TSS (ENSSSCT00000014290)	-170	ENSSSCT00000014290	FADS3
chr2	9178809	9178810	0.0769	1	0.7391	0.6154	0.9	0	ENSSSCG00000013073	0.374114	0.19756	FADS3	2.84824	4.22516	-0.568935	0.000317462	four	9333510	0.458803	0.0846885	0.374114	0.19756	1.89367	0.175248	0.0879901	0.0582685	0.45612	9178810	promoter-TSS (ENSSSCT00000014290)	-173	ENSSSCT00000014290	FADS3
chr2	9178817	9178818	0.0769	0.8182	0.6957	0.8667	0.7368	0	ENSSSCG00000013073	0.374114	0.194393	FADS3	2.84824	4.22516	-0.568935	0.000317462	four	9333511	0.458803	0.0846885	0.374114	0.194393	1.92452	0.224484	0.089559	0.0542893	0.440403	9178818	promoter-TSS (ENSSSCT00000014290)	-181	ENSSSCT00000014290	FADS3
chr2	9178823	9178824	0.0909	1	1	0.8667	0.8235	0	ENSSSCG00000013073	0.374114	0.068163	FADS3	2.84824	4.22516	-0.568935	0.000317462	four	9333512	0.458803	0.0846885	0.374114	0.068163	5.48852	0.0746312	0.086427	4.05e-08	1.06e-05	9178824	promoter-TSS (ENSSSCT00000014290)	-187	ENSSSCT00000014290	FADS3
chr2	9178827	9178828	0	0.8	0.8	0.8571	0.8667	0.1818	ENSSSCG00000013073	0.374114	0.0680914	FADS3	2.84824	4.22516	-0.568935	0.000317462	four	9333513	0.458803	0.0846885	0.374114	0.0680914	5.49429	0.0746312	0.0609784	3.92e-08	1.03e-05	9178828	promoter-TSS (ENSSSCT00000014290)	-191	ENSSSCT00000014290	FADS3
chr2	9178829	9178830	0.6667	0.68	1	0.9	0.5833	0	ENSSSCG00000013073	0.374114	0.068163	FADS3	2.84824	4.22516	-0.568935	0.000317462	four	9333514	0.458803	0.0846885	0.374114	0.068163	5.48852	0.0746312	0.086427	4.05e-08	1.06e-05	9178830	promoter-TSS (ENSSSCT00000014290)	-193	ENSSSCT00000014290	FADS3
chr2	9178833	9178834	0.4516	0.5532	0.8182	0.6923	0.2667	0	ENSSSCG00000013073	0.374114	0.068163	FADS3	2.84824	4.22516	-0.568935	0.000317462	four	9333515	0.458803	0.0846885	0.374114	0.068163	5.48852	0.0746312	0.086427	4.05e-08	1.06e-05	9178834	promoter-TSS (ENSSSCT00000014290)	-197	ENSSSCT00000014290	FADS3
chr2	9178837	9178838	0.5	0.8824	0.75	1	0.7143	0	ENSSSCG00000013073	0.374114	0.0684116	FADS3	2.84824	4.22516	-0.568935	0.000317462	four	9333516	0.458803	0.0846885	0.374114	0.0684116	5.46858	0.0746312	0.091127	4.54e-08	1.17e-05	9178838	promoter-TSS (ENSSSCT00000014290)	-201	ENSSSCT00000014290	FADS3
chr2	9178842	9178843	0.6364	0.8182	0.8462	0.5	0.5833	0	ENSSSCG00000013073	0.374114	0.0684769	FADS3	2.84824	4.22516	-0.568935	0.000317462	four	9333517	0.458803	0.0846885	0.374114	0.0684769	5.46336	0.0746312	0.0926884	4.67e-08	1.2e-05	9178843	promoter-TSS (ENSSSCT00000014290)	-206	ENSSSCT00000014290	FADS3
chr2	9178868	9178869	0.7	0.96	0.85	0.6364	0.4545	0	ENSSSCG00000013073	0.374114	0.0700468	FADS3	2.84824	4.22516	-0.568935	0.000317462	four	9333518	0.458803	0.0846885	0.374114	0.0700468	5.34091	0.0746312	0.104707	9.25e-08	2.13e-05	9178869	promoter-TSS (ENSSSCT00000014290)	-232	ENSSSCT00000014290	FADS3
chr2	9178873	9178874	0.5862	0.9091	0	0.56	0.1667	0.0667	ENSSSCG00000013073	0.374114	0.0709932	FADS3	2.84824	4.22516	-0.568935	0.000317462	four	9333519	0.458803	0.0846885	0.374114	0.0709932	5.26972	0.0746312	0.0590221	1.37e-07	2.95e-05	9178874	promoter-TSS (ENSSSCT00000014290)	-237	ENSSSCT00000014290	FADS3
chr2	9178876	9178877	1	0.8462	1	0.5517	0.6364	0	ENSSSCG00000013073	0.374114	0.0700976	FADS3	2.84824	4.22516	-0.568935	0.000317462	four	9333520	0.458803	0.0846885	0.374114	0.0700976	5.33705	0.0746312	0.10495	9.45e-08	2.17e-05	9178877	promoter-TSS (ENSSSCT00000014290)	-240	ENSSSCT00000014290	FADS3
chr2	9178878	9178879	1	0.9231	0.8182	0.8605	0.6667	0	ENSSSCG00000013073	0.374114	0.0708919	FADS3	2.84824	4.22516	-0.568935	0.000317462	four	9333521	0.458803	0.0846885	0.374114	0.0708919	5.27724	0.0746312	0.0701889	1.31e-07	2.85e-05	9178879	promoter-TSS (ENSSSCT00000014290)	-242	ENSSSCT00000014290	FADS3
chr2	9178884	9178885	0.2667	0.9231	0.8333	0.9231	0.625	0	ENSSSCG00000013073	0.374114	0.0701485	FADS3	2.84824	4.22516	-0.568935	0.000317462	four	9333522	0.458803	0.0846885	0.374114	0.0701485	5.33317	0.0746312	0.106859	9.65e-08	2.2e-05	9178885	promoter-TSS (ENSSSCT00000014290)	-248	ENSSSCT00000014290	FADS3
chr2	9178890	9178891	0.8889	0.75	0.814	0.6364	0.9444	0	ENSSSCG00000013073	0.374114	0.0701916	FADS3	2.84824	4.22516	-0.568935	0.000317462	four	9333523	0.458803	0.0846885	0.374114	0.0701916	5.3299	0.0746312	0.108748	9.83e-08	2.24e-05	9178891	promoter-TSS (ENSSSCT00000014290)	-254	ENSSSCT00000014290	FADS3
chr2	9178904	9178905	0.7	0.8182	0.8889	0.5882	0.6522	0.0667	ENSSSCG00000013073	0.374114	0.0708575	FADS3	2.84824	4.22516	-0.568935	0.000317462	four	9333524	0.458803	0.0846885	0.374114	0.0708575	5.27981	0.0746312	0.0582202	1.29e-07	2.82e-05	9178905	promoter-TSS (ENSSSCT00000014290)	-268	ENSSSCT00000014290	FADS3
chr2	9178908	9178909	0.8889	0.5	0.9	1	0.5789	0.1429	ENSSSCG00000013073	0.374114	0.0707926	FADS3	2.84824	4.22516	-0.568935	0.000317462	four	9333525	0.458803	0.0846885	0.374114	0.0707926	5.28465	0.0746312	0.063001	1.26e-07	2.76e-05	9178909	promoter-TSS (ENSSSCT00000014290)	-272	ENSSSCT00000014290	FADS3
chr2	98886234	98886235	0.8571	0.6	0.9375	0.8	1	0.5625	ENSSSCG00000014149	0.227983	0.11112	MEF2C	166.632	298.96	-0.843288	1.71e-52	four	9966517	0.835522	0.607539	0.227983	0.11112	2.05168	0.0698398	0.0559215	0.040201	0.37742	98886235	promoter-TSS (ENSSSCT00000015454)	-963	ENSSSCT00000015454	MEF2C	MADS-box transcription enhancer factor 2C
chr2	98886249	98886250	1	0.7143	1	1	0.8947	0.7222	ENSSSCG00000014149	0.227983	0.113501	MEF2C	166.632	298.96	-0.843288	1.71e-52	four	9966519	0.835522	0.607539	0.227983	0.113501	2.00865	0.0716287	0.0626575	0.0445739	0.398374	98886250	promoter-TSS (ENSSSCT00000015454)	-978	ENSSSCT00000015454	MEF2C	MADS-box transcription enhancer factor 2C
chr3	1085993	1085994	0.9333	0.4	0.931	1	1	0	ENSSSCG00000007557	0.345507	0.0604337	MICALL2	1.59228	2.286	-0.521729	0.00680655	four	10422904	0.412341	0.0668336	0.345507	0.0604337	5.71714	0.0746312	0.0816645	1.08e-08	3.46e-06	1085994	promoter-TSS (ENSSSCT00000008289)	-426	ENSSSCT00000008289	MICALL2
chr3	1085996	1085997	0.9231	0.4	1	0.9375	1	0	ENSSSCG00000007557	0.345507	0.0602985	MICALL2	1.59228	2.286	-0.521729	0.00680655	four	10422905	0.412341	0.0668336	0.345507	0.0602985	5.72995	0.0746312	0.0806711	1e-08	3.24e-06	1085997	promoter-TSS (ENSSSCT00000008289)	-429	ENSSSCT00000008289	MICALL2
chr3	1086012	1086013	0.9688	1	0.9643	0.2857	0.5455	0	ENSSSCG00000007557	0.279411	0.0418535	MICALL2	1.59228	2.286	-0.521729	0.00680655	four	10422906	0.35296	0.0735493	0.279411	0.0418535	6.67593	0.0746312	0.0850057	2.46e-11	1.81e-08	1086013	promoter-TSS (ENSSSCT00000008289)	-445	ENSSSCT00000008289	MICALL2
chr3	1086021	1086022	0.9412	0.7778	0.9259	1	0.6364	0	ENSSSCG00000007557	0.279411	0.0418535	MICALL2	1.59228	2.286	-0.521729	0.00680655	four	10422907	0.35296	0.0735493	0.279411	0.0418535	6.67593	0.0746312	0.0850057	2.46e-11	1.81e-08	1086022	promoter-TSS (ENSSSCT00000008289)	-454	ENSSSCT00000008289	MICALL2
chr3	1086027	1086028	1	0.6667	0.7222	0.3158	0.7143	0	ENSSSCG00000007557	0.279411	0.0418535	MICALL2	1.59228	2.286	-0.521729	0.00680655	four	10422908	0.35296	0.0735493	0.279411	0.0418535	6.67593	0.0746312	0.0850057	2.46e-11	1.81e-08	1086028	promoter-TSS (ENSSSCT00000008289)	-460	ENSSSCT00000008289	MICALL2
chr3	1086041	1086042	1	1	0.7692	0.9545	0.4118	0	ENSSSCG00000007557	0.279411	0.129383	MICALL2	1.59228	2.286	-0.521729	0.00680655	four	10422909	0.35296	0.0735493	0.279411	0.129383	2.15957	0.0833755	0.0927279	0.0308058	0.326781	1086042	promoter-TSS (ENSSSCT00000008289)	-474	ENSSSCT00000008289	MICALL2
chr3	1086045	1086046	1	1	0.3333	0.8438	0.9375	0	ENSSSCG00000007557	0.279411	0.0455075	MICALL2	1.59228	2.286	-0.521729	0.00680655	four	10422910	0.35296	0.0735493	0.279411	0.0455075	6.13988	0.0746312	0.0952983	8.26e-10	3.8e-07	1086046	promoter-TSS (ENSSSCT00000008289)	-478	ENSSSCT00000008289	MICALL2
chr3	1086053	1086054	0.9487	1	0.7273	0.7222	0.4118	0	ENSSSCG00000007557	0.289679	0.0436233	MICALL2	1.59228	2.286	-0.521729	0.00680655	four	10422911	0.371056	0.081377	0.289679	0.0436233	6.64046	0.0746312	0.102578	3.13e-11	2.23e-08	1086054	promoter-TSS (ENSSSCT00000008289)	-486	ENSSSCT00000008289	MICALL2
chr3	1086075	1086076	1	1	0.8824	0.6667	0.6154	0	ENSSSCG00000007557	0.289679	0.0434176	MICALL2	1.59228	2.286	-0.521729	0.00680655	four	10422912	0.371056	0.081377	0.289679	0.0434176	6.67192	0.0746312	0.0995564	2.52e-11	1.85e-08	1086076	promoter-TSS (ENSSSCT00000008289)	-508	ENSSSCT00000008289	MICALL2
chr3	1086085	1086086	1	0.4	0.0769	0.3714	0.7273	0	ENSSSCG00000007557	0.289679	0.0435277	MICALL2	1.59228	2.286	-0.521729	0.00680655	four	10422913	0.371056	0.081377	0.289679	0.0435277	6.65505	0.0746312	0.101077	2.83e-11	2.05e-08	1086086	promoter-TSS (ENSSSCT00000008289)	-518	ENSSSCT00000008289	MICALL2
chr3	1086088	1086089	1	1	0.8333	0.7895	1	0	ENSSSCG00000007557	0.289679	0.0432915	MICALL2	1.59228	2.286	-0.521729	0.00680655	four	10422914	0.371056	0.081377	0.289679	0.0432915	6.69137	0.0746312	0.0980216	2.21e-11	1.65e-08	1086089	promoter-TSS (ENSSSCT00000008289)	-521	ENSSSCT00000008289	MICALL2
chr3	1086091	1086092	0.931	1	0.6923	0.8286	1	0	ENSSSCG00000007557	0.289679	0.039225	MICALL2	1.59228	2.286	-0.521729	0.00680655	four	10422915	0.371056	0.081377	0.289679	0.039225	7.38505	0.0746312	0.0857682	1.52e-13	2.05e-10	1086092	promoter-TSS (ENSSSCT00000008289)	-524	ENSSSCT00000008289	MICALL2
chr3	1086102	1086103	0.9322	1	0.6364	0.7895	1	0	ENSSSCG00000007557	0.289679	0.0429831	MICALL2	1.59228	2.286	-0.521729	0.00680655	four	10422916	0.371056	0.081377	0.289679	0.0429831	6.73938	0.0746312	0.0949273	1.59e-11	1.23e-08	1086103	promoter-TSS (ENSSSCT00000008289)	-535	ENSSSCT00000008289	MICALL2
chr3	1086104	1086105	0.9792	1	0.4286	0.7419	0	0	ENSSSCG00000007557	0.289679	0.0425857	MICALL2	1.59228	2.286	-0.521729	0.00680655	four	10422917	0.371056	0.081377	0.289679	0.0425857	6.80227	0.0746312	0.0918442	1.03e-11	8.39e-09	1086105	promoter-TSS (ENSSSCT00000008289)	-537	ENSSSCT00000008289	MICALL2
chr3	1086108	1086109	0.8889	0.9565	0.6667	0.7812	0.913	0	ENSSSCG00000007557	0.289679	0.0427966	MICALL2	1.59228	2.286	-0.521729	0.00680655	four	10422918	0.371056	0.081377	0.289679	0.0427966	6.76874	0.0746312	0.0933804	1.3e-11	1.03e-08	1086109	promoter-TSS (ENSSSCT00000008289)	-541	ENSSSCT00000008289	MICALL2
chr3	1086115	1086116	0.9722	0.6087	0.8889	0.8846	1	0	ENSSSCG00000007557	0.289679	0.03815	MICALL2	1.59228	2.286	-0.521729	0.00680655	four	10422919	0.371056	0.081377	0.289679	0.03815	7.59316	0.0746312	0.080559	3.13e-14	5.02e-11	1086116	promoter-TSS (ENSSSCT00000008289)	-548	ENSSSCT00000008289	MICALL2
chr3	117002276	117002277	1	0.6471	0.2	1	0.6364	0.6522	ENSSSCG00000008535	0.113225	0.061681	CLIP4	29.1778	45.4238	-0.638577	6.69e-18	four	11439472	0.892585	0.779361	0.113225	0.061681	1.83565	0.0619402	0.0371185	0.0664093	0.486039	117002277	promoter-TSS (ENSSSCT00000009339)	-586	ENSSSCT00000009339	CLIP4
chr3	117002426	117002427	1	0.6316	0	0.8478	1	0.8	ENSSSCG00000008535	0.10779	0.0467305	CLIP4	29.1778	45.4238	-0.638577	6.69e-18	four	11439474	0.883394	0.775605	0.10779	0.0467305	2.30662	0.0615493	0.0841961	0.0210759	0.263428	117002427	promoter-TSS (ENSSSCT00000009339)	-736	ENSSSCT00000009339	CLIP4
chr3	117002463	117002464	1	0.6585	0	0.963	0.8	0.8571	ENSSSCG00000008535	0.10779	0.0438171	CLIP4	29.1778	45.4238	-0.638577	6.69e-18	four	11439476	0.883394	0.775605	0.10779	0.0438171	2.45999	0.0686078	0.072211	0.0138941	0.20538	117002464	promoter-TSS (ENSSSCT00000009339)	-773	ENSSSCT00000009339	CLIP4
chr3	117002493	117002494	1	0.5455	1	0.6842	0.9444	0.6	ENSSSCG00000008535	0.114552	0.0467897	CLIP4	29.1778	45.4238	-0.638577	6.69e-18	four	11439477	0.892043	0.777491	0.114552	0.0467897	2.44823	0.118109	0.0501876	0.0143559	0.209474	117002494	promoter-TSS (ENSSSCT00000009339)	-803	ENSSSCT00000009339	CLIP4
chr3	117002494	117002495	1	0.7551	0	0.7	0.4706	0.75	ENSSSCG00000008535	0.114552	0.0462971	CLIP4	29.1778	45.4238	-0.638577	6.69e-18	four	11439478	0.892043	0.777491	0.114552	0.0462971	2.47428	0.0630164	0.101206	0.0133504	0.200405	117002495	promoter-TSS (ENSSSCT00000009339)	-804	ENSSSCT00000009339	CLIP4
chr3	119039192	119039193	0.8667	0.5789	1	0.8182	0.6	1	ENSSSCG00000008557	0.103324	0.039812	EMILIN1	0.777018	1.31921	-0.76365	0.0022682	four	11460897	0.810972	0.707648	0.103324	0.039812	2.5953	0.0746312	0.126511	0.00945076	0.16154	119039193	promoter-TSS (ENSSSCT00000009362)	-705	ENSSSCT00000009362	EMILIN1
chr3	119039200	119039201	0.7333	0.8182	0.9565	0.2	0.9	0.6	ENSSSCG00000008557	0.103324	0.0422213	EMILIN1	0.777018	1.31921	-0.76365	0.0022682	four	11460899	0.810972	0.707648	0.103324	0.0422213	2.44721	0.0746312	0.0652682	0.0143968	0.209848	119039201	promoter-TSS (ENSSSCT00000009362)	-713	ENSSSCT00000009362	EMILIN1
chr3	125994291	125994292	0.8333	1	1	0.6	0.8333	0.6364	ENSSSCG00000008601	0.190364	0.140622	SDC1	0.0631509	0.320238	-2.34227	3.26e-05	four	11517829	0.920415	0.73005	0.190364	0.140622	1.35373	0.0746312	0.048951	0.175822	0.726233	125994292	promoter-TSS (ENSSSCT00000036017)	-58	ENSSSCT00000009412	SDC1	syndecan 1
chr3	128396646	128396647	0.1818	1	0.8571	0.8667	0.8667	0.6923	ENSSSCG00000008615	0.231223	0.138962	VSNL1	308.747	508.16	-0.718856	2.15e-31	four	11528370	0.803517	0.572293	0.231223	0.138962	1.66393	0.0553968	0.176606	0.0961263	0.574864	128396647	promoter-TSS (ENSSSCT00000009426)	-612	ENSSSCT00000009426
chr3	128396647	128396648	0.7083	0.8333	0.3333	0.9375	0	0.9286	ENSSSCG00000008615	0.231223	0.0836062	VSNL1	308.747	508.16	-0.718856	2.15e-31	four	11528371	0.803517	0.572293	0.231223	0.0836062	2.76562	0.0573074	0.203316	0.00568139	0.116177	128396648	promoter-TSS (ENSSSCT00000009426)	-613	ENSSSCT00000009426
chr3	19848016	19848017	0.8947	0.9091	0	1	0.8	0.6	ENSSSCG00000007817	0.133107	0.0917262	IL4R	1.20912	2.46407	-1.02708	6.56e-08	four	10660481	0.883538	0.750432	0.133107	0.0917262	1.45113	0.0746312	0.0551032	0.146744	0.681179	19848017	promoter-TSS (ENSSSCT00000033060)	-75	ENSSSCT00000033060	IL4R	interleukin 4 receptor
chr3	19848026	19848027	0.8571	0.6923	0	0.8889	1	0.6	ENSSSCG00000007817	0.133107	0.0930342	IL4R	1.20912	2.46407	-1.02708	6.56e-08	four	10660483	0.883538	0.750432	0.133107	0.0930342	1.43073	0.0746312	0.0533353	0.152509	0.690849	19848027	promoter-TSS (ENSSSCT00000033060)	-85	ENSSSCT00000033060	IL4R	interleukin 4 receptor
chr3	42202512	42202513	0.92	0.6364	0.8	0.9412	0.62	0	ENSSSCG00000008036	0.148496	0.0255017	SYNGR3	5.17017	7.58074	-0.552127	0.00100914	four	10943531	0.242046	0.0935493	0.148496	0.0255017	5.823	0.0746312	0.0968275	5.78e-09	2.02e-06	42202513	promoter-TSS (ENSSSCT00000008805)	49	ENSSSCT00000008805	SYNGR3
chr3	42202536	42202537	1	0.6667	0.9167	0.9375	0.8545	0	ENSSSCG00000008036	0.148496	0.0555081	SYNGR3	5.17017	7.58074	-0.552127	0.00100914	four	10943532	0.242046	0.0935493	0.148496	0.0555081	2.67522	0.196239	0.111046	0.00746806	0.138899	42202537	promoter-TSS (ENSSSCT00000008805)	73	ENSSSCT00000008805	SYNGR3
chr3	42202539	42202540	0.6	0.7273	0.9	1	0.5	0	ENSSSCG00000008036	0.148496	0.0550477	SYNGR3	5.17017	7.58074	-0.552127	0.00100914	four	10943533	0.242046	0.0935493	0.148496	0.0550477	2.69759	0.217511	0.109034	0.00698432	0.132972	42202540	promoter-TSS (ENSSSCT00000008805)	76	ENSSSCT00000008805	SYNGR3
chr3	42202560	42202561	1	0.8182	0.8182	0.6667	0.6667	0	ENSSSCG00000008036	0.154783	0.0610281	SYNGR3	5.17017	7.58074	-0.552127	0.00100914	four	10943535	0.245148	0.0903649	0.154783	0.0610281	2.53626	0.191229	0.11288	0.0112045	0.179773	42202561	promoter-TSS (ENSSSCT00000008805)	97	ENSSSCT00000008805	SYNGR3
chr3	59264985	59264986	0.7059	1	0.3846	0.6667	1	0.2308	ENSSSCG00000008193	0.196788	0.0686743	ZAP70	0.145681	0.638008	-2.13076	5.44e-06	four	11085317	0.692666	0.495878	0.196788	0.0686743	2.86553	0.0746312	0.0712854	0.00416314	0.0943639	59264986	promoter-TSS (ENSSSCT00000008972)	-244	ENSSSCT00000008972	ZAP70	tyrosine-protein kinase ZAP-70
chr3	59264991	59264992	0.8462	1	1	0.8125	0.9333	0	ENSSSCG00000008193	0.196788	0.0516771	ZAP70	0.145681	0.638008	-2.13076	5.44e-06	four	11085318	0.692666	0.495878	0.196788	0.0516771	3.80803	0.0746312	0.343143	0.000140076	0.00802556	59264992	promoter-TSS (ENSSSCT00000008972)	-250	ENSSSCT00000008972	ZAP70	tyrosine-protein kinase ZAP-70
chr3	59265027	59265028	0.1	0.6667	1	1	1	0	ENSSSCG00000008193	0.170617	0.0554927	ZAP70	0.145681	0.638008	-2.13076	5.44e-06	four	11085319	0.710091	0.539474	0.170617	0.0554927	3.07458	0.699192	0.989475	0.002108	0.0590701	59265028	promoter-TSS (ENSSSCT00000008972)	-286	ENSSSCT00000008972	ZAP70	tyrosine-protein kinase ZAP-70
chr3	59265036	59265037	1	1	0.875	1	0.8667	0.4615	ENSSSCG00000008193	0.170617	0.139372	ZAP70	0.145681	0.638008	-2.13076	5.44e-06	four	11085320	0.710091	0.539474	0.170617	0.139372	1.22419	0.0707505	0.0701103	0.220882	0.781893	59265037	promoter-TSS (ENSSSCT00000008972)	-295	ENSSSCT00000008972	ZAP70	tyrosine-protein kinase ZAP-70
chr3	59265051	59265052	0.9762	0.4667	1	1	1	0.1429	ENSSSCG00000008193	0.170617	0.139708	ZAP70	0.145681	0.638008	-2.13076	5.44e-06	four	11085321	0.710091	0.539474	0.170617	0.139708	1.22123	0.0576051	0.0929911	0.221997	0.783048	59265052	promoter-TSS (ENSSSCT00000008972)	-310	ENSSSCT00000008972	ZAP70	tyrosine-protein kinase ZAP-70
chr3	59265083	59265084	0.8919	0.8667	1	0.4286	1	0.5455	ENSSSCG00000008193	0.170617	0.0935522	ZAP70	0.145681	0.638008	-2.13076	5.44e-06	four	11085322	0.710091	0.539474	0.170617	0.0935522	1.82376	0.0604063	0.243494	0.0681885	0.492204	59265084	promoter-TSS (ENSSSCT00000008972)	-342	ENSSSCT00000008972	ZAP70	tyrosine-protein kinase ZAP-70
chr3	67970598	67970599	0.6	0.9677	0.9589	1	0.9412	0.3529	ENSSSCG00000021334	0.157195	0.133724	CH242-307A4.1	1.56875	3.29891	-1.07238	3.63e-07	four	11145743	0.531381	0.374186	0.157195	0.133724	1.17552	0.156527	0.0520929	0.239787	0.801057	67970599	promoter-TSS (ENSSSCT00000035517)	-2	ENSSSCT00000033531	CH242-307A4.1
chr3	9966596	9966597	0.875	1	0.7568	1	0.7059	0	ENSSSCG00000025486	0.209784	0.0925171	MDH2	31.0345	48.2944	-0.63798	1.28e-16	four	10543543	0.430591	0.220806	0.209784	0.0925171	2.26752	0.298229	0.0627297	0.0233586	0.279588	9966597	promoter-TSS (ENSSSCT00000028089)	-628	ENSSSCT00000028089	MDH2	malate dehydrogenase
chr4	119704250	119704251	1	0.9714	0.9167	0.8095	1	1	ENSSSCG00000006800	0.103444	0.0497611	CD53	5.13371	7.78727	-0.601114	0.00042427	four	12619621	0.763256	0.659811	0.103444	0.0497611	2.07882	0.05394	0.157284	0.0376341	0.364424	119704251	promoter-TSS (ENSSSCT00000007448)	-824	ENSSSCT00000007448	CD53
chr4	119704263	119704264	1	0.9459	0.4737	0.8261	1	0.8	ENSSSCG00000006800	0.103444	0.0588171	CD53	5.13371	7.78727	-0.601114	0.00042427	four	12619622	0.763256	0.659811	0.103444	0.0588171	1.75874	0.0955636	0.0599438	0.0786211	0.525913	119704264	promoter-TSS (ENSSSCT00000007448)	-837	ENSSSCT00000007448	CD53
chr4	119704290	119704291	1	1	0.6	1	1	0	ENSSSCG00000006800	0.103444	0.0331082	CD53	5.13371	7.78727	-0.601114	0.00042427	four	12619623	0.763256	0.659811	0.103444	0.0331082	3.12443	0.713063	0.451857	0.00178149	0.0524828	119704291	promoter-TSS (ENSSSCT00000007448)	-864	ENSSSCT00000007448	CD53
chr4	119704310	119704311	1	0.9	0.9091	1	0.9091	1	ENSSSCG00000006800	0.103444	0.0320099	CD53	5.13371	7.78727	-0.601114	0.00042427	four	12619624	0.763256	0.659811	0.103444	0.0320099	3.23163	0.989475	0.427359	0.00123086	0.0403575	119704311	promoter-TSS (ENSSSCT00000007448)	-884	ENSSSCT00000007448	CD53
chr4	119704319	119704320	0.9565	0.7742	0.5	0.8667	1	1	ENSSSCG00000006800	0.103444	0.0440176	CD53	5.13371	7.78727	-0.601114	0.00042427	four	12619625	0.763256	0.659811	0.103444	0.0440176	2.35007	0.182977	0.351213	0.01877	0.246095	119704320	promoter-TSS (ENSSSCT00000007448)	-893	ENSSSCT00000007448	CD53
chr4	119704344	119704345	0.8824	1	1	1	1	0.5333	ENSSSCG00000006800	0.103444	0.0721618	CD53	5.13371	7.78727	-0.601114	0.00042427	four	12619626	0.763256	0.659811	0.103444	0.0721618	1.4335	0.0466738	0.0424656	0.151714	0.689559	119704345	promoter-TSS (ENSSSCT00000007448)	-918	ENSSSCT00000007448	CD53
chr4	119704351	119704352	1	0.9286	1	1	0.7368	0.7333	ENSSSCG00000006800	0.103444	0.0716674	CD53	5.13371	7.78727	-0.601114	0.00042427	four	12619627	0.763256	0.659811	0.103444	0.0716674	1.44339	0.043345	0.0494537	0.14891	0.684888	119704352	promoter-TSS (ENSSSCT00000007448)	-925	ENSSSCT00000007448	CD53
chr4	119704377	119704378	0.6364	0.9286	0.8	1	0.7273	0.6667	ENSSSCG00000006800	0.103444	0.067717	CD53	5.13371	7.78727	-0.601114	0.00042427	four	12619628	0.763256	0.659811	0.103444	0.067717	1.5276	0.0484776	0.0384022	0.126613	0.643893	119704378	promoter-TSS (ENSSSCT00000007448)	-951	ENSSSCT00000007448	CD53
chr4	119704384	119704385	0.6667	0.9375	0.5333	1	0.8	0	ENSSSCG00000006800	0.103444	0.0348725	CD53	5.13371	7.78727	-0.601114	0.00042427	four	12619629	0.763256	0.659811	0.103444	0.0348725	2.96636	0.342187	0.68722	0.0030135	0.0756978	119704385	promoter-TSS (ENSSSCT00000007448)	-958	ENSSSCT00000007448	CD53
chr4	139581928	139581929	0.6429	1	1	0.4	0.6923	0.6	ENSSSCG00000006919	0.101545	0.0980647	GBP4	4.29691	8.92713	-1.0549	1.87e-15	four	12780718	0.695456	0.593911	0.101545	0.0980647	1.03549	0.134447	0.0403737	0.30044	0.850567	139581929	promoter-TSS (ENSSSCT00000007579)	-166	ENSSSCT00000007579	GBP4
chr4	139582128	139582129	1	0.8889	0.96	0.3333	0.8824	0.5	ENSSSCG00000006919	0.145501	0.0601198	GBP4	4.29691	8.92713	-1.0549	1.87e-15	four	12780722	0.696806	0.551305	0.145501	0.0601198	2.42019	0.126603	0.125426	0.0155125	0.219549	139582129	promoter-TSS (ENSSSCT00000007579)	34	ENSSSCT00000007579	GBP4
chr4	139582136	139582137	0.6	0.9375	1	0.5	0.5	0.2727	ENSSSCG00000006919	0.145501	0.0562982	GBP4	4.29691	8.92713	-1.0549	1.87e-15	four	12780723	0.696806	0.551305	0.145501	0.0562982	2.58448	0.161732	0.145332	0.00975266	0.164779	139582137	promoter-TSS (ENSSSCT00000007579)	42	ENSSSCT00000007579	GBP4
chr4	139582170	139582171	1	0.9	1	0.1333	0.6923	0.6	ENSSSCG00000006919	0.138189	0.0711195	GBP4	4.29691	8.92713	-1.0549	1.87e-15	four	12780724	0.673299	0.535111	0.138189	0.0711195	1.94305	0.0695757	0.0575758	0.0520097	0.431058	139582171	promoter-TSS (ENSSSCT00000007579)	76	ENSSSCT00000007579	GBP4
chr4	139649967	139649968	1	0.75	0.2	0.8	0	0.25	ENSSSCG00000006924	0.227572	0.0649066	GBP1	11.7353	26.6972	-1.18583	7.35e-52	four	12781865	0.750312	0.52274	0.227572	0.0649066	3.50615	0.054922	0.0798622	0.000454645	0.019526	139649968	promoter-TSS (ENSSSCT00000007584)	-990	ENSSSCT00000007584	GBP1
chr4	139649994	139649995	0.8333	1	1	1	1	0.4211	ENSSSCG00000006924	0.227572	0.0656536	GBP1	11.7353	26.6972	-1.18583	7.35e-52	four	12781866	0.750312	0.52274	0.227572	0.0656536	3.46625	0.0725336	0.0623392	0.000527769	0.0217955	139649995	promoter-TSS (ENSSSCT00000007584)	-963	ENSSSCT00000007584	GBP1
chr4	139649996	139649997	1	0.8	0.9	1	1	0.5263	ENSSSCG00000006924	0.227572	0.0603438	GBP1	11.7353	26.6972	-1.18583	7.35e-52	four	12781867	0.750312	0.52274	0.227572	0.0603438	3.77126	0.0898723	0.0579513	0.000162426	0.00899126	139649997	promoter-TSS (ENSSSCT00000007584)	-961	ENSSSCT00000007584	GBP1
chr4	139650038	139650039	0.7143	0.8182	1	1	1	0.5	ENSSSCG00000006924	0.258583	0.0710819	GBP1	11.7353	26.6972	-1.18583	7.35e-52	four	12781868	0.787366	0.528783	0.258583	0.0710819	3.63782	0.0952735	0.0543343	0.000274957	0.0134112	139650039	promoter-TSS (ENSSSCT00000007584)	-919	ENSSSCT00000007584	GBP1
chr4	139650044	139650045	0.9167	0.92	0.8182	0.9	0.5833	0.7273	ENSSSCG00000006924	0.258583	0.0712773	GBP1	11.7353	26.6972	-1.18583	7.35e-52	four	12781869	0.787366	0.528783	0.258583	0.0712773	3.62785	0.0668896	0.0675572	0.000285792	0.0138063	139650045	promoter-TSS (ENSSSCT00000007584)	-913	ENSSSCT00000007584	GBP1
chr4	31062251	31062252	0.8	1	0.8667	1	1	1	ENSSSCG00000006031	0.112846	0.092187	TMEM74	6.33037	10.8683	-0.779759	1.54e-17	four	11983065	0.841395	0.728549	0.112846	0.092187	1.2241	0.104869	0.136749	0.220915	0.781928	31062252	promoter-TSS (ENSSSCT00000034120)	-684	ENSSSCT00000034120	TMEM74
chr4	31062294	31062295	0.8	0.7895	1	1	0.8846	0.2381	ENSSSCG00000006031	0.112846	0.0666331	TMEM74	6.33037	10.8683	-0.779759	1.54e-17	four	11983066	0.841395	0.728549	0.112846	0.0666331	1.69354	0.210028	0.171773	0.0903525	0.559638	31062295	promoter-TSS (ENSSSCT00000034120)	-641	ENSSSCT00000034120	TMEM74
chr4	31062334	31062335	0.7	0.85	0.9444	1	1	0.6538	ENSSSCG00000006031	0.112846	0.0420138	TMEM74	6.33037	10.8683	-0.779759	1.54e-17	four	11983067	0.841395	0.728549	0.112846	0.0420138	2.68592	0.0746312	0.127216	0.00723294	0.136052	31062335	promoter-TSS (ENSSSCT00000034120)	-601	ENSSSCT00000034120	TMEM74
chr4	31062337	31062338	0.8	0.875	0.9167	0.7222	0.7333	0.9167	ENSSSCG00000006031	0.112846	0.0483412	TMEM74	6.33037	10.8683	-0.779759	1.54e-17	four	11983068	0.841395	0.728549	0.112846	0.0483412	2.33436	0.0746312	0.083472	0.0195767	0.252287	31062338	promoter-TSS (ENSSSCT00000034120)	-598	ENSSSCT00000034120	TMEM74
chr4	31062350	31062351	0.7778	1	1	1	0.9615	0.7273	ENSSSCG00000006031	0.112846	0.0551798	TMEM74	6.33037	10.8683	-0.779759	1.54e-17	four	11983069	0.841395	0.728549	0.112846	0.0551798	2.04506	0.0746312	0.0695227	0.040849	0.380634	31062351	promoter-TSS (ENSSSCT00000034120)	-585	ENSSSCT00000034120	TMEM74
chr4	31062369	31062370	1	1	0.95	1	0.5	0.8	ENSSSCG00000006031	0.102485	0.049389	TMEM74	6.33037	10.8683	-0.779759	1.54e-17	four	11983070	0.813684	0.711199	0.102485	0.049389	2.07506	0.0746312	0.0867097	0.0379808	0.366214	31062370	promoter-TSS (ENSSSCT00000034120)	-566	ENSSSCT00000034120	TMEM74
chr4	31062378	31062379	0.9091	1	1	0.8	1	0.4118	ENSSSCG00000006031	0.102485	0.0422581	TMEM74	6.33037	10.8683	-0.779759	1.54e-17	four	11983072	0.813684	0.711199	0.102485	0.0422581	2.42522	0.0746312	0.184286	0.0152991	0.217729	31062379	promoter-TSS (ENSSSCT00000034120)	-557	ENSSSCT00000034120	TMEM74
chr4	88933139	88933140	0.7692	0.4706	0.8	1	1	1	ENSSSCG00000006287	0.122979	0.0569504	SELL	1.36551	3.41413	-1.32208	5.88e-11	four	12371811	0.982292	0.859313	0.122979	0.0569504	2.15941	0.0788981	0.0822062	0.0308186	0.326854	88933140	promoter-TSS (ENSSSCT00000032947)	-956	ENSSSCT00000032947	SELL	selectin, lymphocyte
chr4	89001354	89001355	0.9091	0	0.8333	1	0.9231	0.6667	ENSSSCG00000006288	0.109971	0.0752488	SELP	0.638711	1.52895	-1.25931	2.18e-05	four	12372418	0.869072	0.759101	0.109971	0.0752488	1.46144	0.0687753	0.110981	0.143895	0.676233	89001355	promoter-TSS (ENSSSCT00000035164)	-113	ENSSSCT00000035164	SELP	selectin, platele
chr4	89001367	89001368	1	0	0.913	1	1	0.7368	ENSSSCG00000006288	0.109971	0.0653653	SELP	0.638711	1.52895	-1.25931	2.18e-05	four	12372419	0.869072	0.759101	0.109971	0.0653653	1.68241	0.0433418	0.171693	0.0924887	0.565365	89001368	promoter-TSS (ENSSSCT00000035164)	-100	ENSSSCT00000035164	SELP	selectin, platele
chr4	96890449	96890450	0.6667	0.9	0.75	0.8824	0.6923	0.5882	ENSSSCG00000006350	0.321395	0.103586	FCGR2B	0.603337	1.95748	-1.69796	3.99e-10	four	12418396	0.80066	0.479264	0.321395	0.103586	3.10269	0.0567311	0.0437275	0.00191769	0.0552707	96890450	promoter-TSS (ENSSSCT00000034134)	14	ENSSSCT00000034134	CD32	low affinity immunoglobulin gamma Fc region receptor II-b
chr4	97720057	97720058	0.8125	0.9091	0.95	0.9231	0.8182	0.7	ENSSSCG00000006379	0.133121	0.0504621	CD48	1.50345	2.96529	-0.979897	2.96e-09	four	12426841	0.931032	0.79791	0.133121	0.0504621	2.63805	0.0485434	0.0786721	0.00833844	0.149101	97720058	promoter-TSS (ENSSSCT00000034783)	-972	ENSSSCT00000006990	CD48	CD48 antigen
chr4	97720084	97720085	0.9355	1	1	0.8	0.5455	0.7391	ENSSSCG00000006379	0.133121	0.0530568	CD48	1.50345	2.96529	-0.979897	2.96e-09	four	12426842	0.931032	0.79791	0.133121	0.0530568	2.50904	0.0469518	0.0528088	0.0121061	0.188686	97720085	promoter-TSS (ENSSSCT00000034783)	-945	ENSSSCT00000006990	CD48	CD48 antigen
chr4	97772332	97772333	0.7895	1	1	0.9	1	0.7857	ENSSSCG00000006380	0.115135	0.0827399	SLAMF1	0.0862025	0.319544	-1.89021	0.00138168	four	12427270	0.793529	0.678394	0.115135	0.0827399	1.39152	0.0423444	0.0485732	0.164067	0.709158	97772333	promoter-TSS (ENSSSCT00000035346)	-107	ENSSSCT00000035346	SLAMF1	signaling lymphocytic activation molecule family member 1
chr4	97772354	97772355	0.8667	0.9167	1	1	0	0.6842	ENSSSCG00000006380	0.115135	0.0882882	SLAMF1	0.0862025	0.319544	-1.89021	0.00138168	four	12427271	0.793529	0.678394	0.115135	0.0882882	1.30408	0.053731	0.0449295	0.192208	0.748193	97772355	promoter-TSS (ENSSSCT00000035346)	-85	ENSSSCT00000035346	SLAMF1	signaling lymphocytic activation molecule family member 1
chr4	97772439	97772440	1	1	1	0.875	1	0.5714	ENSSSCG00000006380	0.1138	0.0698955	SLAMF1	0.0862025	0.319544	-1.89021	0.00138168	four	12427272	0.781812	0.668012	0.1138	0.0698955	1.62814	0.112386	0.0525436	0.103495	0.59315	97772440	promoter-TSS (ENSSSCT00000035346)	0	ENSSSCT00000035346	SLAMF1	signaling lymphocytic activation molecule family member 1
chr4	97870876	97870877	0.9286	1	0.8095	0.2778	1	0.1875	ENSSSCG00000006382	0.103414	0.144199	SLAMF6	0.159064	0.672448	-2.07981	1.57e-06	four	12428160	0.395055	0.291641	0.103414	0.144199	0.717164	0.122836	0.0723169	0.473273	0.931824	97870877	promoter-TSS (ENSSSCT00000036523)	-43	ENSSSCT00000006995	SLAMF6
chr4	99904584	99904585	0	0.8	1	1	1	0.4545	ENSSSCG00000025644	0.147321	0.101432	CD1A	0.0437858	0.545935	-3.64019	1.05e-05	four	12442421	0.807446	0.660125	0.147321	0.101432	1.45242	0.0746312	0.0713894	0.146384	0.680546	99904585	promoter-TSS (ENSSSCT00000022296)	-950	ENSSSCT00000022296	PCD1A	CD1 antigen
chr5	15412826	15412827	1	0	0	0.8182	1	0.6	ENSSSCG00000000182	0.216852	0.128325	WNT10B	0.10655	0.695778	-2.70709	0.00111231	four	13005971	0.751393	0.534542	0.216852	0.128325	1.68986	0.0535836	0.227589	0.0910554	0.561536	15412827	promoter-TSS (ENSSSCT00000000191)	-305	ENSSSCT00000000191	WNT10B	wingless-type MMTV integration site family, member 10
chr5	15412923	15412924	1	0	0	0.8	1	0.6	ENSSSCG00000000182	0.204417	0.0691867	WNT10B	0.10655	0.695778	-2.70709	0.00111231	four	13005972	0.791048	0.58663	0.204417	0.0691867	2.95457	0.0591435	0.0583568	0.00313102	0.0777073	15412924	promoter-TSS (ENSSSCT00000000191)	-402	ENSSSCT00000000191	WNT10B	wingless-type MMTV integration site family, member 10
chr5	15412941	15412942	1	0	0	1	1	0.6364	ENSSSCG00000000182	0.218738	0.0499449	WNT10B	0.10655	0.695778	-2.70709	0.00111231	four	13005973	0.781375	0.562636	0.218738	0.0499449	4.37959	0.0746312	0.0585837	1.19e-05	0.00115647	15412942	promoter-TSS (ENSSSCT00000000191)	-420	ENSSSCT00000000191	WNT10B	wingless-type MMTV integration site family, member 10
chr5	2168805	2168806	0	0.5	0	0.8182	1	0.6667	ENSSSCG00000000025	0.161004	0.0625531	PARVG	3.80214	6.76267	-0.830783	3.07e-05	four	12878573	0.726988	0.565984	0.161004	0.0625531	2.57388	0.0815637	0.0789958	0.0100565	0.168001	2168806	promoter-TSS (ENSSSCT00000000026)	-367	ENSSSCT00000000026	PARVG	parvin
chr5	2168808	2168809	0.2308	0.8667	0	0.3077	1	1	ENSSSCG00000000025	0.161004	0.0564365	PARVG	3.80214	6.76267	-0.830783	3.07e-05	four	12878574	0.726988	0.565984	0.161004	0.0564365	2.85284	0.0815637	0.291099	0.00433304	0.0969456	2168809	promoter-TSS (ENSSSCT00000000026)	-364	ENSSSCT00000000026	PARVG	parvin
chr5	2168961	2168962	0.6	0.8	0.9444	0.8125	0.8	0.5	ENSSSCG00000000025	0.127304	0.0805656	PARVG	3.80214	6.76267	-0.830783	3.07e-05	four	12878579	0.680195	0.552891	0.127304	0.0805656	1.58013	0.085426	0.0448965	0.114078	0.617524	2168962	promoter-TSS (ENSSSCT00000000026)	-211	ENSSSCT00000000026	PARVG	parvin
chr5	2168976	2168977	1	0.6364	1	1	0.8667	0.6364	ENSSSCG00000000025	0.136649	0.0827161	PARVG	3.80214	6.76267	-0.830783	3.07e-05	four	12878580	0.690591	0.553942	0.136649	0.0827161	1.65203	0.0779158	0.0446838	0.0985292	0.58096	2168977	promoter-TSS (ENSSSCT00000000026)	-196	ENSSSCT00000000026	PARVG	parvin
chr5	2168981	2168982	1	0.3846	0.9259	1	0.8462	0.6364	ENSSSCG00000000025	0.136649	0.0834778	PARVG	3.80214	6.76267	-0.830783	3.07e-05	four	12878581	0.690591	0.553942	0.136649	0.0834778	1.63695	0.0709808	0.0524382	0.101641	0.588664	2168982	promoter-TSS (ENSSSCT00000000026)	-191	ENSSSCT00000000026	PARVG	parvin
chr5	36185725	36185726	1	1	1	0.5	0.0417	0	ENSSSCG00000000492	0.100381	0.0739209	LYZ	0.849771	32.4576	-5.25534	0	four	13137879	0.616159	0.515778	0.100381	0.0739209	1.35795	0.0746312	0.193009	0.17448	0.724335	36185726	promoter-TSS (ENSSSCT00000000530)	-151	ENSSSCT00000000530	LYZ	lysozyme C
chr5	36185726	36185727	0.6154	0.9231	0.4318	0.4211	0.8182	0	ENSSSCG00000000492	0.100381	0.0861154	LYZ	0.849771	32.4576	-5.25534	0	four	13137880	0.616159	0.515778	0.100381	0.0861154	1.16565	0.132397	0.386632	0.243754	0.804757	36185727	promoter-TSS (ENSSSCT00000000530)	-152	ENSSSCT00000000530	LYZ	lysozyme C
chr5	77645859	77645860	0.0625	0.65	0.9091	1	1	0.6667	ENSSSCG00000000799	0.149009	0.0581924	IRAK4	2.95048	11.0106	-1.89987	1.1e-51	four	13414406	0.633852	0.484844	0.149009	0.0581924	2.56062	0.12956	0.111294	0.0104485	0.172083	77645860	promoter-TSS (ENSSSCT00000000866)	-781	ENSSSCT00000000866	IRAK4	interleukin-1 receptor-associated kinase 4
chr6	119212056	119212057	0.2821	1	0.5	0.7143	0.9	0.3636	ENSSSCG00000003755	0.13046	0.106544	MCOLN2	0.344791	1.11431	-1.69236	1.01e-06	four	14860833	0.573098	0.442639	0.13046	0.106544	1.22447	0.0712167	0.0730994	0.220776	0.781778	119212057	promoter-TSS (ENSSSCT00000004157)	-769	ENSSSCT00000004157	MCOLN2
chr6	134278471	134278472	0.8485	1	0.6667	0.9487	0.75	0.5714	ENSSSCG00000003801	0.222447	0.120695	IL23R	0	0.108231	#NAME?	7.94e-06	four	14933561	0.722246	0.499799	0.222447	0.120695	1.84305	0.0775667	0.0491109	0.0653215	0.482263	134278472	promoter-TSS (ENSSSCT00000032866)	-235	ENSSSCT00000033490	IL23R	interleukin 23 receptor
chr6	134278490	134278491	0.918	0.8846	0.4167	0.8333	0.8235	0.3571	ENSSSCG00000003801	0.154147	0.111412	IL23R	0	0.108231	#NAME?	7.94e-06	four	14933563	0.599869	0.445722	0.154147	0.111412	1.38357	0.0604855	0.0589969	0.166489	0.712764	134278491	promoter-TSS (ENSSSCT00000032866)	-254	ENSSSCT00000033490	IL23R	interleukin 23 receptor
chr6	137434795	137434796	0.5238	0.9434	1	1	1	0.75	ENSSSCG00000003815	0.144506	0.05513	ALG6	5.59513	8.43678	-0.592521	1.03e-08	four	14964810	0.649502	0.504995	0.144506	0.05513	2.62119	0.0746312	0.0900312	0.00876229	0.15393	137434796	promoter-TSS (ENSSSCT00000004222)	-549	ENSSSCT00000004222	ALG6	alpha-1,3-glucosyltransferase
chr6	137434811	137434812	0.9167	0.5385	0.8421	0.875	1	0.7	ENSSSCG00000003815	0.144506	0.0539251	ALG6	5.59513	8.43678	-0.592521	1.03e-08	four	14964811	0.649502	0.504995	0.144506	0.0539251	2.67976	0.0746312	0.0743591	0.00736756	0.137685	137434812	promoter-TSS (ENSSSCT00000004222)	-565	ENSSSCT00000004222	ALG6	alpha-1,3-glucosyltransferase
chr6	137434885	137434886	0.8485	0.9016	1	0.4082	0.9333	0.6154	ENSSSCG00000003815	0.138192	0.196776	ALG6	5.59513	8.43678	-0.592521	1.03e-08	four	14964812	0.647279	0.509087	0.138192	0.196776	0.70228	0.0512864	0.0659826	0.482504	0.93461	137434886	promoter-TSS (ENSSSCT00000004222)	-639	ENSSSCT00000004222	ALG6	alpha-1,3-glucosyltransferase
chr6	137434891	137434892	0.7647	0.8983	1	0.5435	0.8333	0.8462	ENSSSCG00000003815	0.138192	0.156499	ALG6	5.59513	8.43678	-0.592521	1.03e-08	four	14964813	0.647279	0.509087	0.138192	0.156499	0.883021	0.189331	0.108385	0.377225	0.894623	137434892	promoter-TSS (ENSSSCT00000004222)	-645	ENSSSCT00000004222	ALG6	alpha-1,3-glucosyltransferase
chr6	17400345	17400346	0.8571	0.2174	1	0.8824	0.9091	1	ENSSSCG00000029165	0.145717	0.127712	DOK4	3.44016	5.15489	-0.583464	5.54e-06	four	13923011	0.86361	0.717893	0.145717	0.127712	1.14098	0.0456594	0.194748	0.25388	0.813973	17400346	promoter-TSS (ENSSSCT00000024456)	-348	ENSSSCT00000024456	DOK4
chr6	223810	223811	0.6429	0.7	0.8182	1	1	0.3846	ENSSSCG00000002637	0.18012	0.0492094	DBNDD1	2.21183	3.98064	-0.847763	0.000103551	four	13692648	0.725431	0.54531	0.18012	0.0492094	3.66028	0.0746312	0.08127	0.000251939	0.0125565	223811	promoter-TSS (ENSSSCT00000002927)	-646	ENSSSCT00000002927	DBNDD1
chr6	223842	223843	0.7692	1	1	1	0.9333	0.75	ENSSSCG00000002637	0.18012	0.0674856	DBNDD1	2.21183	3.98064	-0.847763	0.000103551	four	13692649	0.725431	0.54531	0.18012	0.0674856	2.66902	0.0638883	0.0718777	0.00760739	0.140574	223843	promoter-TSS (ENSSSCT00000002927)	-678	ENSSSCT00000002927	DBNDD1
chr6	223851	223852	0.7647	0.7143	0.9333	0.5455	0	0.5294	ENSSSCG00000002637	0.18012	0.0581583	DBNDD1	2.21183	3.98064	-0.847763	0.000103551	four	13692650	0.725431	0.54531	0.18012	0.0581583	3.09707	0.253701	0.163235	0.00195445	0.0560193	223852	promoter-TSS (ENSSSCT00000002927)	-687	ENSSSCT00000002927	DBNDD1
chr6	223856	223857	0.4	0.6667	0.85	0.2222	1	0.5294	ENSSSCG00000002637	0.18012	0.0512253	DBNDD1	2.21183	3.98064	-0.847763	0.000103551	four	13692651	0.725431	0.54531	0.18012	0.0512253	3.51624	0.801031	0.242838	0.00043771	0.0189858	223857	promoter-TSS (ENSSSCT00000002927)	-692	ENSSSCT00000002927	DBNDD1
chr6	223865	223866	1	0.9286	1	1	0.7647	0.625	ENSSSCG00000002637	0.18012	0.0760808	DBNDD1	2.21183	3.98064	-0.847763	0.000103551	four	13692652	0.725431	0.54531	0.18012	0.0760808	2.36749	0.0782544	0.0626391	0.0179094	0.239335	223866	promoter-TSS (ENSSSCT00000002927)	-701	ENSSSCT00000002927	DBNDD1
chr6	223875	223876	0.8333	1	0	0.6923	1	0.125	ENSSSCG00000002637	0.18012	0.0541325	DBNDD1	2.21183	3.98064	-0.847763	0.000103551	four	13692653	0.725431	0.54531	0.18012	0.0541325	3.32739	0.386167	0.316417	0.000876627	0.0316158	223876	promoter-TSS (ENSSSCT00000002927)	-711	ENSSSCT00000002927	DBNDD1
chr6	223882	223883	1	0.8235	1	0.9167	0.8889	0.2353	ENSSSCG00000002637	0.18012	0.0519602	DBNDD1	2.21183	3.98064	-0.847763	0.000103551	four	13692654	0.725431	0.54531	0.18012	0.0519602	3.46651	0.75996	0.346277	0.00052727	0.0217804	223883	promoter-TSS (ENSSSCT00000002927)	-718	ENSSSCT00000002927	DBNDD1
chr6	223890	223891	1	0.8125	0.8333	1	0.9333	0.2353	ENSSSCG00000002637	0.18012	0.064939	DBNDD1	2.21183	3.98064	-0.847763	0.000103551	four	13692655	0.725431	0.54531	0.18012	0.064939	2.77368	0.222519	0.232443	0.00554254	0.114286	223891	promoter-TSS (ENSSSCT00000002927)	-726	ENSSSCT00000002927	DBNDD1
chr6	223924	223925	1	0.9355	0.1	0.9091	1	0.8462	ENSSSCG00000002637	0.18012	0.0675706	DBNDD1	2.21183	3.98064	-0.847763	0.000103551	four	13692656	0.725431	0.54531	0.18012	0.0675706	2.66566	0.187741	0.14631	0.00768371	0.141465	223925	promoter-TSS (ENSSSCT00000002927)	-760	ENSSSCT00000002927	DBNDD1
chr6	223978	223979	0.8182	0.8571	0.8667	1	1	1	ENSSSCG00000002637	0.18012	0.082253	DBNDD1	2.21183	3.98064	-0.847763	0.000103551	four	13692657	0.725431	0.54531	0.18012	0.082253	2.18983	0.0461692	0.207012	0.0285364	0.313156	223979	promoter-TSS (ENSSSCT00000002927)	-814	ENSSSCT00000002927	DBNDD1
chr6	224002	224003	1	1	0.8571	0.7895	1	1	ENSSSCG00000002637	0.18012	0.0711475	DBNDD1	2.21183	3.98064	-0.847763	0.000103551	four	13692658	0.725431	0.54531	0.18012	0.0711475	2.53164	0.192376	0.176529	0.0113529	0.181258	224003	promoter-TSS (ENSSSCT00000002927)	-838	ENSSSCT00000002927	DBNDD1
chr6	224007	224008	0.8333	0.6923	0.8571	0.8095	1	1	ENSSSCG00000002637	0.18012	0.0820994	DBNDD1	2.21183	3.98064	-0.847763	0.000103551	four	13692659	0.725431	0.54531	0.18012	0.0820994	2.19393	0.0574531	0.268155	0.0282405	0.31136	224008	promoter-TSS (ENSSSCT00000002927)	-843	ENSSSCT00000002927	DBNDD1
chr6	224012	224013	0.6667	1	0.9231	0.8182	0.9394	1	ENSSSCG00000002637	0.18012	0.0571541	DBNDD1	2.21183	3.98064	-0.847763	0.000103551	four	13692660	0.725431	0.54531	0.18012	0.0571541	3.15148	0.196634	0.989475	0.00162444	0.0491632	224013	promoter-TSS (ENSSSCT00000002927)	-848	ENSSSCT00000002927	DBNDD1
chr6	224014	224015	1	0.7917	0.75	1	1	1	ENSSSCG00000002637	0.18012	0.0566528	DBNDD1	2.21183	3.98064	-0.847763	0.000103551	four	13692661	0.725431	0.54531	0.18012	0.0566528	3.17937	0.397709	0.347394	0.00147596	0.04593	224015	promoter-TSS (ENSSSCT00000002927)	-850	ENSSSCT00000002927	DBNDD1
chr6	224022	224023	0.7941	0.931	1	0.5652	1	1	ENSSSCG00000002637	0.18012	0.0520681	DBNDD1	2.21183	3.98064	-0.847763	0.000103551	four	13692662	0.725431	0.54531	0.18012	0.0520681	3.45932	0.408366	0.604159	0.000541541	0.0222152	224023	promoter-TSS (ENSSSCT00000002927)	-858	ENSSSCT00000002927	DBNDD1
chr6	49120904	49120905	0.5455	0.9688	1	1	0.7333	0.8	ENSSSCG00000003130	0.118132	0.105294	SULT2A1	0.0369309	0.678417	-4.19927	7.64e-05	four	14206739	0.779803	0.661671	0.118132	0.105294	1.12193	0.103346	0.0672801	0.261893	0.820939	49120905	promoter-TSS (ENSSSCT00000003471)	-964	ENSSSCT00000003471	SULT2A1	bile-salt sulfotransferase
chr6	64046430	64046431	0	0.4545	1	0.8	0	0.4615	ENSSSCG00000003395	0.220686	0.0731255	CH242-402I11.1	1.56715	2.67368	-0.770688	1.64e-06	four	14400191	0.757276	0.536591	0.220686	0.0731255	3.01791	0.10243	0.0858404	0.00254529	0.0673588	64046431	promoter-TSS (ENSSSCT00000036263)	-291	ENSSSCT00000036263	CH242-402I11.1	phosphatidylinositol-4,5-bisphosphate 3-kinase
chr6	64046439	64046440	0	0.9	1	0.7222	0	0.75	ENSSSCG00000003395	0.220686	0.076202	CH242-402I11.1	1.56715	2.67368	-0.770688	1.64e-06	four	14400192	0.757276	0.536591	0.220686	0.076202	2.89606	0.0605456	0.0610622	0.00377879	0.0883758	64046440	promoter-TSS (ENSSSCT00000036263)	-300	ENSSSCT00000036263	CH242-402I11.1	phosphatidylinositol-4,5-bisphosphate 3-kinase
chr6	64046444	64046445	0	0.8182	1	1	0.0227	0.75	ENSSSCG00000003395	0.220686	0.0751919	CH242-402I11.1	1.56715	2.67368	-0.770688	1.64e-06	four	14400193	0.757276	0.536591	0.220686	0.0751919	2.93497	0.0605456	0.0904609	0.00333583	0.081171	64046445	promoter-TSS (ENSSSCT00000036263)	-305	ENSSSCT00000036263	CH242-402I11.1	phosphatidylinositol-4,5-bisphosphate 3-kinase
chr6	64046486	64046487	0	0.6429	0.8667	0.5	0.0213	0.6	ENSSSCG00000003395	0.210377	0.0889582	CH242-402I11.1	1.56715	2.67368	-0.770688	1.64e-06	four	14400194	0.769979	0.559602	0.210377	0.0889582	2.3649	0.126441	0.0487631	0.018035	0.240332	64046487	promoter-TSS (ENSSSCT00000036263)	-347	ENSSSCT00000036263	CH242-402I11.1	phosphatidylinositol-4,5-bisphosphate 3-kinase
chr6	64046522	64046523	0	0.7647	1	0.6296	0.0465	0.4444	ENSSSCG00000003395	0.190911	0.0832088	CH242-402I11.1	1.56715	2.67368	-0.770688	1.64e-06	four	14400195	0.748812	0.557901	0.190911	0.0832088	2.29436	0.0882305	0.105338	0.0217699	0.268459	64046523	promoter-TSS (ENSSSCT00000036263)	-383	ENSSSCT00000036263	CH242-402I11.1	phosphatidylinositol-4,5-bisphosphate 3-kinase
chr6	64046563	64046564	0	0.913	0.9375	0.8571	0	0.6429	ENSSSCG00000003395	0.173498	0.0612041	CH242-402I11.1	1.56715	2.67368	-0.770688	1.64e-06	four	14400196	0.739927	0.566428	0.173498	0.0612041	2.83475	0.0746312	0.111952	0.00458618	0.100716	64046564	promoter-TSS (ENSSSCT00000036263)	-424	ENSSSCT00000036263	CH242-402I11.1	phosphatidylinositol-4,5-bisphosphate 3-kinase
chr6	64046702	64046703	0.7647	0.8421	0.4737	1	0	1	ENSSSCG00000003395	0.158741	0.0942355	CH242-402I11.1	1.56715	2.67368	-0.770688	1.64e-06	four	14400198	0.744728	0.585987	0.158741	0.0942355	1.68452	0.108656	0.301608	0.092082	0.564271	64046703	promoter-TSS (ENSSSCT00000036263)	-563	ENSSSCT00000036263	CH242-402I11.1	phosphatidylinositol-4,5-bisphosphate 3-kinase
chr6	65740695	65740696	0.9429	1	0.8537	1	0	1	ENSSSCG00000003423	0.110425	0.05443	DRAXIN	2.37266	5.74329	-1.27537	1.27e-30	four	14425378	0.830529	0.720104	0.110425	0.05443	2.02875	0.298898	0.135096	0.0424833	0.388558	65740696	promoter-TSS (ENSSSCT00000003797)	-52	ENSSSCT00000003798	DRAXIN
chr6	65740740	65740741	0.9412	1	0.9487	0.8333	0	0.5385	ENSSSCG00000003423	0.110057	0.0664679	DRAXIN	2.37266	5.74329	-1.27537	1.27e-30	four	14425379	0.830871	0.720815	0.110057	0.0664679	1.65579	0.102213	0.0542254	0.0977651	0.579046	65740741	promoter-TSS (ENSSSCT00000003797)	-97	ENSSSCT00000003798	DRAXIN
chr6	65740753	65740754	1	1	1	1	0	0.8182	ENSSSCG00000003423	0.110057	0.0697674	DRAXIN	2.37266	5.74329	-1.27537	1.27e-30	four	14425381	0.830871	0.720815	0.110057	0.0697674	1.57748	0.0792019	0.0511233	0.114685	0.618877	65740754	promoter-TSS (ENSSSCT00000003797)	-110	ENSSSCT00000003798	DRAXIN
chr6	65740758	65740759	1	0.8	0	0.8462	0	0.4545	ENSSSCG00000003423	0.110057	0.0696676	DRAXIN	2.37266	5.74329	-1.27537	1.27e-30	four	14425383	0.830871	0.720815	0.110057	0.0696676	1.57974	0.0447842	0.0680324	0.114166	0.617729	65740759	promoter-TSS (ENSSSCT00000003797)	-115	ENSSSCT00000003798	DRAXIN
chr6	69395109	69395110	0.2	1	0.125	0.625	0.8	0.6364	ENSSSCG00000003467	0.116918	0.0676785	SLC25A34	0.288385	0.685239	-1.24861	0.0223549	four	14466357	0.829453	0.712535	0.116918	0.0676785	1.72755	0.0479896	0.0537099	0.0840681	0.542054	69395110	promoter-TSS (ENSSSCT00000003853)	-219	ENSSSCT00000003853	SLC25A34
chr6	69395140	69395141	0.6154	1	0.2917	0.8182	0.9375	0.9444	ENSSSCG00000003467	0.117233	0.0677702	SLC25A34	0.288385	0.685239	-1.24861	0.0223549	four	14466358	0.824967	0.707733	0.117233	0.0677702	1.72986	0.0645101	0.070202	0.0836547	0.540868	69395141	promoter-TSS (ENSSSCT00000003853)	-250	ENSSSCT00000003853	SLC25A34
chr6	69395144	69395145	1	0.6429	0.1579	0.8667	0.9412	0.9444	ENSSSCG00000003467	0.123591	0.0630765	SLC25A34	0.288385	0.685239	-1.24861	0.0223549	four	14466359	0.821634	0.698042	0.123591	0.0630765	1.95939	0.0665432	0.139456	0.0500674	0.422864	69395145	promoter-TSS (ENSSSCT00000003853)	-254	ENSSSCT00000003853	SLC25A34
chr6	69395178	69395179	0.7	0.7895	0	0.8889	0.7	0.7368	ENSSSCG00000003467	0.121245	0.0719945	SLC25A34	0.288385	0.685239	-1.24861	0.0223549	four	14466360	0.813465	0.692221	0.121245	0.0719945	1.68408	0.0375112	0.0411054	0.0921655	0.564486	69395179	promoter-TSS (ENSSSCT00000003853)	-288	ENSSSCT00000003853	SLC25A34
chr6	69395210	69395211	0.8	0.64	0.0476	0.4706	0.8261	0.4167	ENSSSCG00000003467	0.121245	0.0596921	SLC25A34	0.288385	0.685239	-1.24861	0.0223549	four	14466361	0.813465	0.692221	0.121245	0.0596921	2.03117	0.0997084	0.0568471	0.0422379	0.387377	69395211	promoter-TSS (ENSSSCT00000003853)	-320	ENSSSCT00000003853	SLC25A34
chr6	79349412	79349413	1	0	0.5909	0.95	0.8462	0.1429	ENSSSCG00000022489	0.11753	0.0761661	SNORA73	2.0396	4.92124	-1.27073	0.029467	four	14565549	0.366406	0.248875	0.11753	0.0761661	1.54308	0.044745	0.0653383	0.122812	0.636215	79349413	promoter-TSS (ENSSSCT00000024114)	-337	ENSSSCT00000024114	SNORA73
chr6	79349421	79349422	0.8333	0	0.8	0.8929	1	0.3684	ENSSSCG00000022489	0.11753	0.0752554	SNORA73	2.0396	4.92124	-1.27073	0.029467	four	14565550	0.366406	0.248875	0.11753	0.0752554	1.56175	0.0620429	0.0671806	0.118346	0.626797	79349422	promoter-TSS (ENSSSCT00000024114)	-328	ENSSSCT00000024114	SNORA73
chr6	79349437	79349438	1	0.1538	0.6364	0.6667	0.6364	0.1053	ENSSSCG00000022489	0.11753	0.0632238	SNORA73	2.0396	4.92124	-1.27073	0.029467	four	14565551	0.366406	0.248875	0.11753	0.0632238	1.85896	0.219227	0.0818463	0.063033	0.473984	79349438	promoter-TSS (ENSSSCT00000024114)	-312	ENSSSCT00000024114	SNORA73
chr6	82011537	82011538	0	1	0.5263	0.9167	0.4615	0.4118	ENSSSCG00000003603	0.129895	0.0797209	COL16A1	3.88217	7.09267	-0.869466	2.15e-18	four	14587684	0.895638	0.765743	0.129895	0.0797209	1.62937	0.0517825	0.423729	0.103234	0.592525	82011538	promoter-TSS (ENSSSCT00000032016)	85	ENSSSCT00000032016
chr7	119618510	119618511	0	0.84	0.6364	0.6	1	0	ENSSSCG00000002440	0.199955	0.0251192	CCDC88C	1.75826	2.61452	-0.572397	0.000278169	four	16186468	0.282402	0.0824472	0.199955	0.0251192	7.96023	0.0746312	0.109258	1.78e-15	3.8e-12	119618511	promoter-TSS (ENSSSCT00000002710)	97	ENSSSCT00000002710	CCDC88C
chr7	119618511	119618512	0.6957	0.9	0.7273	0.8182	0.5	0	ENSSSCG00000002440	0.199955	0.0229163	CCDC88C	1.75826	2.61452	-0.572397	0.000278169	four	16186469	0.282402	0.0824472	0.199955	0.0229163	8.72545	0.0746312	0.083274	0	0	119618512	promoter-TSS (ENSSSCT00000002710)	96	ENSSSCT00000002710	CCDC88C
chr7	119618513	119618514	0	0.2222	0.7333	0.6667	1	0	ENSSSCG00000002440	0.199955	0.0251192	CCDC88C	1.75826	2.61452	-0.572397	0.000278169	four	16186470	0.282402	0.0824472	0.199955	0.0251192	7.96023	0.0746312	0.109258	1.78e-15	3.8e-12	119618514	promoter-TSS (ENSSSCT00000002710)	94	ENSSSCT00000002710	CCDC88C
chr7	119618514	119618515	0.7857	1	0.8333	0.8	0.25	0	ENSSSCG00000002440	0.199955	0.0231151	CCDC88C	1.75826	2.61452	-0.572397	0.000278169	four	16186471	0.282402	0.0824472	0.199955	0.0231151	8.65039	0.0746312	0.085955	0	0	119618515	promoter-TSS (ENSSSCT00000002710)	93	ENSSSCT00000002710	CCDC88C
chr7	119618518	119618519	0.9286	0.8824	0.5385	1	1	0	ENSSSCG00000002440	0.197971	0.0251535	CCDC88C	1.75826	2.61452	-0.572397	0.000278169	four	16186472	0.28035	0.0823788	0.197971	0.0251535	7.87051	0.0746312	0.112014	3.55e-15	7.13e-12	119618519	promoter-TSS (ENSSSCT00000002710)	89	ENSSSCT00000002710	CCDC88C
chr7	119618519	119618520	0.9615	0.8333	0.7273	0.4103	0.375	0	ENSSSCG00000002440	0.197971	0.0230031	CCDC88C	1.75826	2.61452	-0.572397	0.000278169	four	16186473	0.28035	0.0823788	0.197971	0.0230031	8.60628	0.0746312	0.0845849	0	0	119618520	promoter-TSS (ENSSSCT00000002710)	88	ENSSSCT00000002710	CCDC88C
chr7	119618520	119618521	0.8824	0.8571	0.5	0.8462	1	0	ENSSSCG00000002440	0.197971	0.0250697	CCDC88C	1.75826	2.61452	-0.572397	0.000278169	four	16186474	0.28035	0.0823788	0.197971	0.0250697	7.89683	0.0746312	0.108836	2.89e-15	5.9e-12	119618521	promoter-TSS (ENSSSCT00000002710)	87	ENSSSCT00000002710	CCDC88C
chr7	119618521	119618522	1	0.7812	0.6	0.9	1	0	ENSSSCG00000002440	0.197971	0.0230031	CCDC88C	1.75826	2.61452	-0.572397	0.000278169	four	16186475	0.28035	0.0823788	0.197971	0.0230031	8.60628	0.0746312	0.0845849	0	0	119618522	promoter-TSS (ENSSSCT00000002710)	86	ENSSSCT00000002710	CCDC88C
chr7	119618524	119618525	1	0.5833	0.5217	1	1	0	ENSSSCG00000002440	0.197971	0.0257545	CCDC88C	1.75826	2.61452	-0.572397	0.000278169	four	16186476	0.28035	0.0823788	0.197971	0.0257545	7.68684	0.0746312	0.07655	1.51e-14	2.62e-11	119618525	promoter-TSS (ENSSSCT00000002710)	83	ENSSSCT00000002710	CCDC88C
chr7	119618525	119618526	0.9231	0.9556	0.9	0.5833	0.5455	0	ENSSSCG00000002440	0.197971	0.022781	CCDC88C	1.75826	2.61452	-0.572397	0.000278169	four	16186477	0.28035	0.0823788	0.197971	0.022781	8.69017	0.0746312	0.0819393	0	0	119618526	promoter-TSS (ENSSSCT00000002710)	82	ENSSSCT00000002710	CCDC88C
chr7	119618537	119618538	1	0.8333	0.8364	1	1	0	ENSSSCG00000002440	0.196002	0.0251059	CCDC88C	1.75826	2.61452	-0.572397	0.000278169	four	16186478	0.27828	0.0822786	0.196002	0.0251059	7.80701	0.0746312	0.109058	5.77e-15	1.1e-11	119618538	promoter-TSS (ENSSSCT00000002710)	70	ENSSSCT00000002710	CCDC88C
chr7	119618542	119618543	1	0.8333	0.9825	0.8889	0.8667	0	ENSSSCG00000002440	0.198051	0.0249377	CCDC88C	1.75826	2.61452	-0.572397	0.000278169	four	16186479	0.28035	0.0822985	0.198051	0.0249377	7.94183	0.0746312	0.102905	2e-15	4.22e-12	119618543	promoter-TSS (ENSSSCT00000002710)	65	ENSSSCT00000002710	CCDC88C
chr7	119618544	119618545	0.8182	0.8462	0.6042	1	1	0	ENSSSCG00000002440	0.198051	0.0250031	CCDC88C	1.75826	2.61452	-0.572397	0.000278169	four	16186480	0.28035	0.0822985	0.198051	0.0250031	7.92109	0.0746312	0.105874	2.44e-15	5.07e-12	119618545	promoter-TSS (ENSSSCT00000002710)	63	ENSSSCT00000002710	CCDC88C
chr7	119618552	119618553	0.7143	0.7692	0.5455	0.8	0.8462	0	ENSSSCG00000002440	0.196078	0.0235021	CCDC88C	1.75826	2.61452	-0.572397	0.000278169	four	16186481	0.27828	0.0822019	0.196078	0.0235021	8.34301	0.0746312	0.0950955	0	0	119618553	promoter-TSS (ENSSSCT00000002710)	55	ENSSSCT00000002710	CCDC88C
chr7	119618557	119618558	0.3077	1	0.8	0.8621	0.9554	0	ENSSSCG00000002440	0.1817	0.0560162	CCDC88C	1.75826	2.61452	-0.572397	0.000278169	four	16186482	0.263892	0.0821925	0.1817	0.0560162	3.2437	0.11503	0.0924919	0.00117989	0.0391482	119618558	promoter-TSS (ENSSSCT00000002710)	50	ENSSSCT00000002710	CCDC88C
chr7	119618559	119618560	0.6923	0.8462	0.8	1	0.9898	0	ENSSSCG00000002440	0.1817	0.0221083	CCDC88C	1.75826	2.61452	-0.572397	0.000278169	four	16186483	0.263892	0.0821925	0.1817	0.0221083	8.21863	0.0746312	0.089855	2.22e-16	5.7e-13	119618560	promoter-TSS (ENSSSCT00000002710)	48	ENSSSCT00000002710	CCDC88C
chr7	119618565	119618566	0.6667	0.6364	1	0.8333	0.9882	0	ENSSSCG00000002440	0.171207	0.0210796	CCDC88C	1.75826	2.61452	-0.572397	0.000278169	four	16186484	0.253395	0.0821884	0.171207	0.0210796	8.12192	0.0746312	0.0885	4.44e-16	1.08e-12	119618566	promoter-TSS (ENSSSCT00000002710)	42	ENSSSCT00000002710	CCDC88C
chr7	119618568	119618569	1	0.8	0.5	0.5	0.5833	0	ENSSSCG00000002440	0.171207	0.0534013	CCDC88C	1.75826	2.61452	-0.572397	0.000278169	four	16186485	0.253395	0.0821884	0.171207	0.0534013	3.20604	0.112664	0.0965932	0.00134576	0.0430166	119618569	promoter-TSS (ENSSSCT00000002710)	39	ENSSSCT00000002710	CCDC88C
chr7	119618574	119618575	0.8	1	0.8	0.8333	0.8125	0	ENSSSCG00000002440	0.156361	0.0488323	CCDC88C	1.75826	2.61452	-0.572397	0.000278169	four	16186486	0.238532	0.0821715	0.156361	0.0488323	3.202	0.109725	0.101292	0.00136478	0.0434521	119618575	promoter-TSS (ENSSSCT00000002710)	33	ENSSSCT00000002710	CCDC88C
chr7	119618576	119618577	1	0.8182	1	0.8333	1	0	ENSSSCG00000002440	0.147264	0.0464254	CCDC88C	1.75826	2.61452	-0.572397	0.000278169	four	16186487	0.229428	0.0821644	0.147264	0.0464254	3.17206	0.107332	0.098134	0.00151364	0.0467593	119618577	promoter-TSS (ENSSSCT00000002710)	31	ENSSSCT00000002710	CCDC88C
chr7	119618581	119618582	0.8333	0.5789	1	1	0.8947	0	ENSSSCG00000002440	0.138995	0.0471238	CCDC88C	1.75826	2.61452	-0.572397	0.000278169	four	16186488	0.221168	0.0821733	0.138995	0.0471238	2.94957	0.0640391	0.0897745	0.00318213	0.0785797	119618582	promoter-TSS (ENSSSCT00000002710)	26	ENSSSCT00000002710	CCDC88C
chr7	119618585	119618586	1	0.65	1	1	1	0	ENSSSCG00000002440	0.131306	0.0447198	CCDC88C	1.75826	2.61452	-0.572397	0.000278169	four	16186489	0.213488	0.0821825	0.131306	0.0447198	2.93619	0.12394	0.0758352	0.0033227	0.0809542	119618586	promoter-TSS (ENSSSCT00000002710)	22	ENSSSCT00000002710	CCDC88C
chr7	12309295	12309296	0.8	1	0.7	0.6875	0.9677	0	ENSSSCG00000001062	0.218227	0.0379071	DTNBP1	11.0217	18.867	-0.775511	1.13e-09	four	15361906	0.290846	0.072619	0.218227	0.0379071	5.75689	0.0746312	0.0825483	8.57e-09	2.83e-06	12309296	promoter-TSS (ENSSSCT00000001157)	-14	ENSSSCT00000001157	DTNBP1
chr7	12309306	12309307	1	0.7368	0.8182	0.8571	1	0	ENSSSCG00000001062	0.218227	0.0406536	DTNBP1	11.0217	18.867	-0.775511	1.13e-09	four	15361907	0.290846	0.072619	0.218227	0.0406536	5.36795	0.0746312	0.0950139	7.96e-08	1.88e-05	12309307	promoter-TSS (ENSSSCT00000001157)	-25	ENSSSCT00000001157	DTNBP1
chr7	12309312	12309313	0.6	0.7742	0.2308	1	0.8621	0	ENSSSCG00000001062	0.197253	0.036683	DTNBP1	11.0217	18.867	-0.775511	1.13e-09	four	15361908	0.267467	0.0702147	0.197253	0.036683	5.37722	0.0746312	0.0923733	7.56e-08	1.8e-05	12309313	promoter-TSS (ENSSSCT00000001157)	-31	ENSSSCT00000001157	DTNBP1
chr7	12309321	12309322	0.5	0.7917	0.35	1	0.9167	0	ENSSSCG00000001062	0.197253	0.0369348	DTNBP1	11.0217	18.867	-0.775511	1.13e-09	four	15361909	0.267467	0.0702147	0.197253	0.0369348	5.34056	0.0746312	0.0683221	9.27e-08	2.13e-05	12309322	promoter-TSS (ENSSSCT00000001157)	-40	ENSSSCT00000001157	DTNBP1
chr7	12309327	12309328	0.8	0.78	0.3571	1	0.9524	0	ENSSSCG00000001062	0.197253	0.0988207	DTNBP1	11.0217	18.867	-0.775511	1.13e-09	four	15361910	0.267467	0.0702147	0.197253	0.0988207	1.99606	0.109388	0.0896545	0.0459269	0.404582	12309328	promoter-TSS (ENSSSCT00000001157)	-46	ENSSSCT00000001157	DTNBP1
chr7	12309329	12309330	0.4	1	0.1875	1	1	0	ENSSSCG00000001062	0.197253	0.0987653	DTNBP1	11.0217	18.867	-0.775511	1.13e-09	four	15361911	0.267467	0.0702147	0.197253	0.0987653	1.99718	0.109388	0.0883264	0.0458053	0.404028	12309330	promoter-TSS (ENSSSCT00000001157)	-48	ENSSSCT00000001157	DTNBP1
chr7	12309332	12309333	0.5714	1	0.3077	1	1	0	ENSSSCG00000001062	0.197253	0.0988746	DTNBP1	11.0217	18.867	-0.775511	1.13e-09	four	15361912	0.267467	0.0702147	0.197253	0.0988746	1.99498	0.109388	0.0910054	0.0460454	0.405123	12309333	promoter-TSS (ENSSSCT00000001157)	-51	ENSSSCT00000001157	DTNBP1
chr7	12309335	12309336	1	0.7895	0.3	1	0.8333	0	ENSSSCG00000001062	0.197253	0.0988207	DTNBP1	11.0217	18.867	-0.775511	1.13e-09	four	15361913	0.267467	0.0702147	0.197253	0.0988207	1.99606	0.109388	0.0896545	0.0459269	0.404582	12309336	promoter-TSS (ENSSSCT00000001157)	-54	ENSSSCT00000001157	DTNBP1
chr7	12309345	12309346	0.9	0.7895	0.6667	0.52	1	0	ENSSSCG00000001062	0.197253	0.0362561	DTNBP1	11.0217	18.867	-0.775511	1.13e-09	four	15361914	0.267467	0.0702147	0.197253	0.0362561	5.44053	0.0746312	0.0883264	5.31e-08	1.33e-05	12309346	promoter-TSS (ENSSSCT00000001157)	-64	ENSSSCT00000001157	DTNBP1
chr7	12309560	12309561	0.375	1	0.5714	1	0.8276	0	ENSSSCG00000001062	0.123282	0.0674839	DTNBP1	11.0217	18.867	-0.775511	1.13e-09	four	15361921	0.196066	0.0727837	0.123282	0.0674839	1.82684	0.254229	0.109228	0.0677237	0.490605	12309561	promoter-TSS (ENSSSCT00000001157)	-279	ENSSSCT00000001157	DTNBP1
chr7	12309612	12309613	0.76	1	0.5	1	0.9608	0	ENSSSCG00000001062	0.137513	0.10246	DTNBP1	11.0217	18.867	-0.775511	1.13e-09	four	15361922	0.216976	0.0794634	0.137513	0.10246	1.34211	0.208876	0.137333	0.179561	0.731416	12309613	promoter-TSS (ENSSSCT00000001157)	-331	ENSSSCT00000001157	DTNBP1
chr7	12309618	12309619	0.4255	1	0.2	0.6875	1	0	ENSSSCG00000001062	0.155687	0.0834137	DTNBP1	11.0217	18.867	-0.775511	1.13e-09	four	15361923	0.229977	0.0742891	0.155687	0.0834137	1.86645	0.496407	0.130669	0.0619786	0.470124	12309619	promoter-TSS (ENSSSCT00000001157)	-337	ENSSSCT00000001157	DTNBP1
chr7	20496566	20496567	0.5	0.6923	0.5263	0.7027	0.8966	0.4286	ENSSSCG00000001089	0.14102	0.196227	GPLD1	3.87422	5.79477	-0.580845	5.83e-05	four	15428447	0.515113	0.374092	0.14102	0.196227	0.718659	0.0579181	0.0572167	0.472351	0.931527	20496567	promoter-TSS (ENSSSCT00000001185)	48	ENSSSCT00000001185	GPLD1	glycosylphosphatidylinositol phospholipase D
chr7	22033125	22033126	1	0.9623	0.875	1	0.7273	0.8571	ENSSSCG00000026757	0.169983	0.0783959	HIST1H2BD	10.1494	16.3916	-0.691554	0.00310892	four	15438795	0.91162	0.741637	0.169983	0.0783959	2.16827	0.0667916	0.280165	0.0301385	0.322843	22033126	promoter-TSS (ENSSSCT00000028510)	-776	ENSSSCT00000028510		histone H2B
chr7	24646201	24646202	1	0.8571	1	0.7857	1	0.3	ENSSSCG00000001227	0.150228	0.0720607	TMP-SLA-3	18.0711	31.9942	-0.824129	7.48e-18	four	15455500	0.763576	0.613348	0.150228	0.0720607	2.08475	0.057377	0.0976872	0.0370921	0.36157	24646202	promoter-TSS (ENSSSCT00000001326)	-878	ENSSSCT00000035587	TMP-SLA-3
chr7	24646202	24646203	0.9333	0.8	0.9667	0.3	1	0.5	ENSSSCG00000001227	0.150228	0.064455	TMP-SLA-3	18.0711	31.9942	-0.824129	7.48e-18	four	15455501	0.763576	0.613348	0.150228	0.064455	2.33075	0.735114	0.0621577	0.0197666	0.253711	24646203	promoter-TSS (ENSSSCT00000001326)	-879	ENSSSCT00000035587	TMP-SLA-3
chr7	24646223	24646224	0.8667	1	0.9091	0.5455	1	0.4	ENSSSCG00000001227	0.150228	0.0725191	TMP-SLA-3	18.0711	31.9942	-0.824129	7.48e-18	four	15455502	0.763576	0.613348	0.150228	0.0725191	2.07157	0.0816092	0.0735068	0.0383055	0.36789	24646224	promoter-TSS (ENSSSCT00000001326)	-900	ENSSSCT00000035587	TMP-SLA-3
chr7	24646224	24646225	0.8462	0.8333	1	0.8333	1	0.6364	ENSSSCG00000001227	0.150228	0.0759076	TMP-SLA-3	18.0711	31.9942	-0.824129	7.48e-18	four	15455503	0.763576	0.613348	0.150228	0.0759076	1.9791	0.0565734	0.057872	0.0478052	0.412981	24646225	promoter-TSS (ENSSSCT00000001326)	-901	ENSSSCT00000035587	TMP-SLA-3
chr7	24646238	24646239	1	0.8095	1	0.7	0.7	0.6667	ENSSSCG00000001227	0.150228	0.0783268	TMP-SLA-3	18.0711	31.9942	-0.824129	7.48e-18	four	15455504	0.763576	0.613348	0.150228	0.0783268	1.91797	0.0569158	0.0581123	0.055115	0.443721	24646239	promoter-TSS (ENSSSCT00000001326)	-915	ENSSSCT00000035587	TMP-SLA-3
chr7	24646239	24646240	0.875	0.7692	0.9524	0.3077	0.4	0.6875	ENSSSCG00000001227	0.150228	0.082802	TMP-SLA-3	18.0711	31.9942	-0.824129	7.48e-18	four	15455505	0.763576	0.613348	0.150228	0.082802	1.81431	0.0625119	0.0576307	0.0696302	0.497107	24646240	promoter-TSS (ENSSSCT00000001326)	-916	ENSSSCT00000035587	TMP-SLA-3
chr7	24646312	24646313	1	0.8095	1	0.4	0.8	1	ENSSSCG00000001227	0.150228	0.074113	TMP-SLA-3	18.0711	31.9942	-0.824129	7.48e-18	four	15455506	0.763576	0.613348	0.150228	0.074113	2.02702	0.0741538	0.242248	0.0426604	0.3894	24646313	promoter-TSS (ENSSSCT00000001326)	-989	ENSSSCT00000035587	TMP-SLA-3
chr7	24646313	24646314	0.9231	0	0.9375	0.6923	0.7895	0.5385	ENSSSCG00000001227	0.150228	0.109526	TMP-SLA-3	18.0711	31.9942	-0.824129	7.48e-18	four	15455507	0.763576	0.613348	0.150228	0.109526	1.37163	0.0481394	0.0556376	0.170179	0.718162	24646314	promoter-TSS (ENSSSCT00000001326)	-990	ENSSSCT00000035587	TMP-SLA-3
chr7	27578073	27578074	1	1	0.5833	1	0.5714	0	ENSSSCG00000001402	0.125848	0.0459673	NFKBIL1	5.20968	8.45027	-0.697804	1.85e-06	four	15477616	0.183541	0.0576929	0.125848	0.0459673	2.73778	0.0574771	0.0925421	0.00618561	0.122833	27578074	promoter-TSS (ENSSSCT00000001530)	-3	ENSSSCT00000001531	NFKBIL1
chr7	27578088	27578089	1	0.5455	0.6364	0.75	1	0	ENSSSCG00000001402	0.114119	0.0417338	NFKBIL1	5.20968	8.45027	-0.697804	1.85e-06	four	15477618	0.170713	0.0565941	0.114119	0.0417338	2.73446	0.057628	0.0861054	0.00624835	0.12365	27578089	promoter-TSS (ENSSSCT00000001530)	-18	ENSSSCT00000001531	NFKBIL1
chr7	27578094	27578095	0.8462	0.1667	0.9	1	0.8182	0	ENSSSCG00000001402	0.114119	0.0417338	NFKBIL1	5.20968	8.45027	-0.697804	1.85e-06	four	15477619	0.170713	0.0565941	0.114119	0.0417338	2.73446	0.057628	0.0861054	0.00624835	0.12365	27578095	promoter-TSS (ENSSSCT00000001530)	-24	ENSSSCT00000001531	NFKBIL1
chr7	27578097	27578098	1	1	0	0.7273	1	0	ENSSSCG00000001402	0.114119	0.0402434	NFKBIL1	5.20968	8.45027	-0.697804	1.85e-06	four	15477620	0.170713	0.0565941	0.114119	0.0402434	2.83572	0.103642	0.0878057	0.00457224	0.100509	27578098	promoter-TSS (ENSSSCT00000001530)	-27	ENSSSCT00000001531	NFKBIL1
chr7	27578107	27578108	0.9375	1	0	1	1	0	ENSSSCG00000001402	0.114119	0.0418926	NFKBIL1	5.20968	8.45027	-0.697804	1.85e-06	four	15477621	0.170713	0.0565941	0.114119	0.0418926	2.72409	0.057628	0.0878057	0.00644796	0.126234	27578108	promoter-TSS (ENSSSCT00000001530)	-37	ENSSSCT00000001531	NFKBIL1
chr7	27578123	27578124	1	1	0.5294	1	0.9167	0	ENSSSCG00000001402	0.114119	0.0215529	NFKBIL1	5.20968	8.45027	-0.697804	1.85e-06	four	15477622	0.170713	0.0565941	0.114119	0.0215529	5.29485	0.0746312	0.0852512	1.19e-07	2.63e-05	27578124	promoter-TSS (ENSSSCT00000001530)	-53	ENSSSCT00000001531	NFKBIL1
chr7	27578125	27578126	1	1	0.5833	1	0.8824	0	ENSSSCG00000001402	0.103343	0.0363295	NFKBIL1	5.20968	8.45027	-0.697804	1.85e-06	four	15477623	0.159372	0.0560286	0.103343	0.0363295	2.84461	0.0617929	0.0832762	0.00444665	0.0986517	27578126	promoter-TSS (ENSSSCT00000001530)	-55	ENSSSCT00000001531	NFKBIL1
chr7	27578131	27578132	1	0.5882	0.9	0.9474	1	0	ENSSSCG00000001402	0.103343	0.0200256	NFKBIL1	5.20968	8.45027	-0.697804	1.85e-06	four	15477624	0.159372	0.0560286	0.103343	0.0200256	5.16055	0.0746312	0.0811872	2.46e-07	4.83e-05	27578132	promoter-TSS (ENSSSCT00000001530)	-61	ENSSSCT00000001531	NFKBIL1
chr7	27578138	27578139	0.8667	0.6364	0.8	1	0.7273	0	ENSSSCG00000001402	0.103343	0.0202541	NFKBIL1	5.20968	8.45027	-0.697804	1.85e-06	four	15477625	0.159372	0.0560286	0.103343	0.0202541	5.10232	0.0746312	0.0818758	3.36e-07	6.26e-05	27578139	promoter-TSS (ENSSSCT00000001530)	-68	ENSSSCT00000001531	NFKBIL1
chr7	27792140	27792141	1	0.9259	0.8571	0.9286	0.9231	0.5714	ENSSSCG00000001422	0.114688	0.0486697	C2	1.68591	6.31392	-1.90501	6.82e-33	four	15480795	0.7593	0.644612	0.114688	0.0486697	2.35645	0.0517407	0.0460393	0.0184503	0.243602	27792141	promoter-TSS (ENSSSCT00000032654)	-464	ENSSSCT00000001563	C2	complement component 2
chr7	27792180	27792181	1	0.8333	1	1	0.75	0.7368	ENSSSCG00000001422	0.121343	0.0509554	C2	1.68591	6.31392	-1.90501	6.82e-33	four	15480796	0.776179	0.654836	0.121343	0.0509554	2.38136	0.0952092	0.0374224	0.017249	0.234008	27792181	promoter-TSS (ENSSSCT00000032654)	-504	ENSSSCT00000001563	C2	complement component 2
chr7	27792188	27792189	1	0.9375	1	1	1	0.65	ENSSSCG00000001422	0.121343	0.0496908	C2	1.68591	6.31392	-1.90501	6.82e-33	four	15480797	0.776179	0.654836	0.121343	0.0496908	2.44196	0.0816993	0.0640882	0.0146077	0.211694	27792189	promoter-TSS (ENSSSCT00000032654)	-512	ENSSSCT00000001563	C2	complement component 2
chr7	27792201	27792202	0.963	0.6154	0.6364	0.9444	1	0.5909	ENSSSCG00000001422	0.110061	0.0491187	C2	1.68591	6.31392	-1.90501	6.82e-33	four	15480798	0.783957	0.673895	0.110061	0.0491187	2.24071	0.168691	0.0680541	0.0250446	0.29098	27792202	promoter-TSS (ENSSSCT00000032654)	-525	ENSSSCT00000001563	C2	complement component 2
chr7	27792224	27792225	0.8667	0.4	0.4	0.8	0.9524	0.5769	ENSSSCG00000001422	0.110061	0.0581751	C2	1.68591	6.31392	-1.90501	6.82e-33	four	15480799	0.783957	0.673895	0.110061	0.0581751	1.89189	0.0532856	0.0464956	0.0585051	0.457044	27792225	promoter-TSS (ENSSSCT00000032654)	-548	ENSSSCT00000001563	C2	complement component 2
chr7	27792255	27792256	1	0.9333	0.8333	1	0.88	0.5769	ENSSSCG00000001422	0.104711	0.0601863	C2	1.68591	6.31392	-1.90501	6.82e-33	four	15480801	0.791537	0.686826	0.104711	0.0601863	1.73979	0.0620837	0.0533587	0.0818962	0.535706	27792256	promoter-TSS (ENSSSCT00000032654)	-579	ENSSSCT00000001563	C2	complement component 2
chr7	27819195	27819196	0.4	0.9524	0.4375	1	0.5333	0	ENSSSCG00000001422	0.108362	0.0218457	C2	1.68591	6.31392	-1.90501	6.82e-33	four	15481365	0.17264	0.0642783	0.108362	0.0218457	4.96031	0.0746312	0.07816	7.04e-07	0.000115719	27819196	promoter-TSS (ENSSSCT00000033494)	56	ENSSSCT00000033494	C2	complement component 2
chr7	29099575	29099576	0.7	1	0.8333	0.85	1	0.8667	ENSSSCG00000001454	0.118098	0.100207	SLA-DRB2	0.12383	0.712871	-2.52528	0.000856188	four	15487290	0.975037	0.856939	0.118098	0.100207	1.17854	0.078176	0.0600983	0.238581	0.799902	29099576	promoter-TSS (ENSSSCT00000001610)	-781	ENSSSCT00000001610	SLA-DRB2
chr7	29504389	29504390	0.875	0.9444	0.9167	0.3889	0.8182	0.4	ENSSSCG00000001470	0.141857	0.0446785	HLA-DMA	2.28595	5.66215	-1.30856	1.3e-17	four	15488710	0.638692	0.496835	0.141857	0.0446785	3.17506	0.0746312	0.0649814	0.00149808	0.0464164	29504390	promoter-TSS (ENSSSCT00000035735)	90	ENSSSCT00000035735	SLA-DMA	major histocompatibility complex, class II
chr7	29504448	29504449	0.7097	0.5484	1	0.6667	0.8387	0.5333	ENSSSCG00000001470	0.141857	0.0817008	HLA-DMA	2.28595	5.66215	-1.30856	1.3e-17	four	15488713	0.638692	0.496835	0.141857	0.0817008	1.7363	0.0746312	0.0435389	0.0825113	0.537506	29504449	promoter-TSS (ENSSSCT00000035635)	31	ENSSSCT00000035735	SLA-DMA	major histocompatibility complex, class II
chr7	30109390	30109391	0.8667	0.9286	0.8824	1	1	0.8333	ENSSSCG00000001479	0.11031	0.0882328	HMGCLL1	17.4352	27.41	-0.652697	1.69e-15	four	15494118	0.94441	0.834099	0.11031	0.0882328	1.25022	0.0575304	0.0561729	0.21122	0.77112	30109391	promoter-TSS (ENSSSCT00000001650)	-740	ENSSSCT00000001650	HMGCLL1	hydroxymethylglutaryl-CoA lyase
chr7	30109638	30109639	1	0.9412	0.7	0.3333	1	0.6923	ENSSSCG00000001479	0.127008	0.109209	HMGCLL1	17.4352	27.41	-0.652697	1.69e-15	four	15494121	0.908702	0.781695	0.127008	0.109209	1.16298	0.0746312	0.0499313	0.244838	0.80578	30109639	promoter-TSS (ENSSSCT00000001650)	-492	ENSSSCT00000001650	HMGCLL1	hydroxymethylglutaryl-CoA lyase
chr7	34380377	34380378	0.7692	1	0.9	0.5	0.9655	0	ENSSSCG00000001511	0.126442	0.12984	PHF1	8.84177	12.8286	-0.536962	0.000137994	four	15532555	0.26316	0.136718	0.126442	0.12984	0.973833	0.0619476	0.0901417	0.33014	0.869501	34380378	promoter-TSS (ENSSSCT00000001684)	98	ENSSSCT00000001684	PHF1
chr7	34380402	34380403	1	1	0.6364	0.7273	0.75	0	ENSSSCG00000001511	0.126442	0.12984	PHF1	8.84177	12.8286	-0.536962	0.000137994	four	15532556	0.26316	0.136718	0.126442	0.12984	0.973833	0.0619476	0.0901417	0.33014	0.869501	34380403	promoter-TSS (ENSSSCT00000001684)	73	ENSSSCT00000001684	PHF1
chr7	55683781	55683782	0.7368	0.3636	0.4545	0.6	0.6667	0	ENSSSCG00000001787	0.110927	0.0694837	IL16	0.328776	0.770933	-1.2295	0.000195227	four	15720549	0.533961	0.423034	0.110927	0.0694837	1.59644	0.0786677	0.283949	0.11039	0.609275	55683782	promoter-TSS (ENSSSCT00000002002)	-921	ENSSSCT00000002002	IL-16
chr7	55683840	55683841	0.8205	0.5714	0	0.5	0.8947	0.2	ENSSSCG00000001787	0.129755	0.0575786	IL16	0.328776	0.770933	-1.2295	0.000195227	four	15720550	0.49288	0.363126	0.129755	0.0575786	2.25352	0.079555	0.126853	0.0242263	0.28552	55683841	promoter-TSS (ENSSSCT00000002002)	-862	ENSSSCT00000002002	IL-16
chr7	55683967	55683968	0.9697	1	0.4	0.8333	0.7037	0	ENSSSCG00000001787	0.154707	0.0859648	IL16	0.328776	0.770933	-1.2295	0.000195227	four	15720551	0.376094	0.221386	0.154707	0.0859648	1.79966	0.277072	0.162485	0.0719145	0.504717	55683968	promoter-TSS (ENSSSCT00000002002)	-735	ENSSSCT00000002002	IL-16
chr7	55683991	55683992	0.9643	0.7778	1	1	0.6897	0.1667	ENSSSCG00000001787	0.103352	0.0910966	IL16	0.328776	0.770933	-1.2295	0.000195227	four	15720552	0.327509	0.224156	0.103352	0.0910966	1.13453	0.054926	0.072385	0.256571	0.816331	55683992	promoter-TSS (ENSSSCT00000002002)	-711	ENSSSCT00000002002	IL-16
chr7	60255611	60255612	0.8	1	1	0.8182	1	0.6667	ENSSSCG00000001849	0.11541	0.0327932	ANPEP	0.609134	0.946695	-0.636142	0.0145056	four	15771756	0.554907	0.439496	0.11541	0.0327932	3.51934	0.0746312	0.0796715	0.000432615	0.0188214	60255612	promoter-TSS (ENSSSCT00000002072)	-550	ENSSSCT00000002072	APN	aminopeptidase N
chr7	80469253	80469254	1	1	0.8947	0.6364	0.8333	0.2857	ENSSSCG00000002009	0.139433	0.105573	PCK2	0.528985	1.10151	-1.05819	0.00406253	four	15886769	0.647614	0.508181	0.139433	0.105573	1.32073	0.293055	0.19209	0.186591	0.740892	80469254	promoter-TSS (ENSSSCT00000002248)	-311	ENSSSCT00000002248	PCK2	phosphoenolpyruvate carboxykinase (GTP)
chr7	80840476	80840477	0.4	0.1818	0.8889	0.4118	0.2727	0	ENSSSCG00000002014	0.206519	0.22594	JPH4	46.8137	72.6059	-0.633157	7.59e-20	four	15889059	0.25186	0.0453406	0.206519	0.22594	0.914044	0.113823	0.0824347	0.360694	0.886352	80840477	promoter-TSS (ENSSSCT00000002253)	-166	ENSSSCT00000002253	JPH4
chr7	80840555	80840556	0.4483	0.7692	0.8824	0.7692	0.5294	0	ENSSSCG00000002014	0.206519	0.0732397	JPH4	46.8137	72.6059	-0.633157	7.59e-20	four	15889060	0.25186	0.0453406	0.206519	0.0732397	2.81977	0.0746312	0.0887208	0.0048058	0.103926	80840556	promoter-TSS (ENSSSCT00000002253)	-87	ENSSSCT00000002253	JPH4
chr7	80840569	80840570	0	0.7333	1	0.4118	0.2308	0	ENSSSCG00000002014	0.206519	0.0726532	JPH4	46.8137	72.6059	-0.633157	7.59e-20	four	15889061	0.25186	0.0453406	0.206519	0.0726532	2.84253	0.0746312	0.0852062	0.00447567	0.0990828	80840570	promoter-TSS (ENSSSCT00000002253)	-73	ENSSSCT00000002253	JPH4
chr7	93829231	93829232	0.7368	0.86	0.4667	1	0.6	0.875	ENSSSCG00000002262	0.162068	0.119724	SV2B	102.869	168.432	-0.711361	6.54e-48	four	15965480	0.742675	0.580607	0.162068	0.119724	1.35368	0.17068	0.0933345	0.175838	0.726256	93829232	promoter-TSS (ENSSSCT00000002519)	-647	ENSSSCT00000002519	SV2B	MFS transporter, VNT family, synaptic vesicle glycoprotein 2
chr7	94902953	94902954	0.8	0.6923	0.7143	1	0	0.8571	ENSSSCG00000002268	0.135521	0.122265	AKAP5	40.9955	76.7528	-0.904753	4.53e-36	four	15971356	0.919906	0.784385	0.135521	0.122265	1.10842	0.044472	0.04952	0.267681	0.825785	94902954	promoter-TSS (ENSSSCT00000002526)	-267	ENSSSCT00000002526	AKAP5
chr8	11544313	11544314	1	0.9474	1	0.7368	1	0.8	ENSSSCG00000029227	0.231938	0.104586	LDB2	11.6039	20.8353	-0.844425	1.68e-09	four	16503408	0.673951	0.442012	0.231938	0.104586	2.21769	0.0746312	0.143637	0.0265763	0.300892	11544314	promoter-TSS (ENSSSCT00000025105)	-883	ENSSSCT00000025105	LDB2
chr8	11544330	11544331	0.75	0.913	1	0.4737	0.8	0.4	ENSSSCG00000029227	0.188355	0.116698	LDB2	11.6039	20.8353	-0.844425	1.68e-09	four	16503409	0.637051	0.448696	0.188355	0.116698	1.61404	0.0746312	0.0583573	0.106519	0.600391	11544331	promoter-TSS (ENSSSCT00000025105)	-900	ENSSSCT00000025105	LDB2
chr8	118152690	118152691	1	0.7273	1	1	0.5	0	ENSSSCG00000009127	0.140715	0.186939	ALPK1	1.32528	1.98448	-0.582461	0.000224299	four	17097260	0.835218	0.694503	0.140715	0.186939	0.752732	0.989475	0.989475	0.451611	0.924807	118152691	promoter-TSS (ENSSSCT00000009995)	-234	ENSSSCT00000009994	ALPK1
chr8	144545559	144545560	0.9688	0.7143	0.8333	0.24	1	0.2	ENSSSCG00000009240	0.115604	0.0976496	PLAC8	1.63444	5.60344	-1.77752	1.71e-11	four	17274503	0.522928	0.407324	0.115604	0.0976496	1.18386	0.0844154	0.0754674	0.236468	0.797811	144545560	promoter-TSS (ENSSSCT00000010120)	-131	ENSSSCT00000010120	PLAC8
chr8	144545575	144545576	0.8	1	1	0.5	0.9048	0.1667	ENSSSCG00000009240	0.115604	0.101653	PLAC8	1.63444	5.60344	-1.77752	1.71e-11	four	17274505	0.522928	0.407324	0.115604	0.101653	1.13723	0.0551846	0.0877518	0.255441	0.815329	144545576	promoter-TSS (ENSSSCT00000010120)	-115	ENSSSCT00000010120	PLAC8
chr8	449124	449125	0.9091	0.8947	0.8333	0.75	1	0	ENSSSCG00000008683	0.177894	0.031534	NAT8L	7.83672	11.5278	-0.556796	0.0346534	four	16375130	0.258183	0.0802888	0.177894	0.031534	5.64134	0.0746312	0.0809121	1.69e-08	5.05e-06	449125	promoter-TSS (ENSSSCT00000009500)	60	ENSSSCT00000009500	NAT8L	aspartate N-acetyltransferase
chr8	449132	449133	0.8	0.7778	1	0.9167	0.9474	0	ENSSSCG00000008683	0.163676	0.0303833	NAT8L	7.83672	11.5278	-0.556796	0.0346534	four	16375131	0.246218	0.0825416	0.163676	0.0303833	5.38703	0.0746312	0.0811799	7.16e-08	1.71e-05	449133	promoter-TSS (ENSSSCT00000009500)	68	ENSSSCT00000009500	NAT8L	aspartate N-acetyltransferase
chr8	449134	449135	0.8667	1	1	0.9605	0.9444	0	ENSSSCG00000008683	0.150996	0.0296282	NAT8L	7.83672	11.5278	-0.556796	0.0346534	four	16375132	0.235776	0.0847797	0.150996	0.0296282	5.09637	0.0746312	0.0828714	3.46e-07	6.43e-05	449135	promoter-TSS (ENSSSCT00000009500)	70	ENSSSCT00000009500	NAT8L	aspartate N-acetyltransferase
chr8	449141	449142	1	1	0.2	0.9383	0.8	0	ENSSSCG00000008683	0.12957	0.0285786	NAT8L	7.83672	11.5278	-0.556796	0.0346534	four	16375133	0.218782	0.0892126	0.12957	0.0285786	4.5338	0.0746312	0.0850561	5.79e-06	0.000647989	449142	promoter-TSS (ENSSSCT00000009500)	77	ENSSSCT00000009500	NAT8L	aspartate N-acetyltransferase
chr8	449151	449152	1	1	0.9	0.8933	0.9091	0	ENSSSCG00000008683	0.120365	0.0332352	NAT8L	7.83672	11.5278	-0.556796	0.0346534	four	16375134	0.211772	0.0914075	0.120365	0.0332352	3.6216	0.0746312	0.102532	0.000292788	0.0140602	449152	promoter-TSS (ENSSSCT00000009500)	87	ENSSSCT00000009500	NAT8L	aspartate N-acetyltransferase
chr8	449153	449154	0.8462	0.8	0.4545	0.8444	0.75	0	ENSSSCG00000008683	0.111924	0.0327711	NAT8L	7.83672	11.5278	-0.556796	0.0346534	four	16375135	0.205512	0.0935883	0.111924	0.0327711	3.41532	0.0746312	0.0993713	0.00063707	0.0250295	449154	promoter-TSS (ENSSSCT00000009500)	89	ENSSSCT00000009500	NAT8L	aspartate N-acetyltransferase
chr8	75882338	75882339	0.92	0.8814	0.9	0.4348	0.8182	0.2857	ENSSSCG00000008977	0.11177	0.0603163	CXCL10	2.92689	16.9804	-2.53643	9.57e-92	four	16863224	0.40599	0.294219	0.11177	0.0603163	1.85307	0.0746312	0.0558599	0.0638722	0.477041	75882339	promoter-TSS (ENSSSCT00000009832)	-122	ENSSSCT00000009832	CXCL10	C-X-C motif chemokine 10
chr8	75882437	75882438	0.8947	0.8462	1	0.9091	0	0.5333	ENSSSCG00000008977	0.11177	0.0711599	CXCL10	2.92689	16.9804	-2.53643	9.57e-92	four	16863226	0.40599	0.294219	0.11177	0.0711599	1.57069	0.0746312	0.113859	0.116254	0.622267	75882438	promoter-TSS (ENSSSCT00000009832)	-221	ENSSSCT00000009832	CXCL10	C-X-C motif chemokine 10
chr8	92879472	92879473	0.6923	0.625	0.8333	0.7647	0.7368	0.6667	ENSSSCG00000009059	0.177197	0.0974069	MGST2	0.472088	1.7869	-1.92033	0.0359298	four	16995223	0.871413	0.694216	0.177197	0.0974069	1.81914	0.150158	0.0513368	0.0688894	0.494586	92879473	promoter-TSS (ENSSSCT00000009923)	-765	ENSSSCT00000009923	MGST2
chr9	119465192	119465193	0.375	1	0.55	0.9167	0.8182	0.3	ENSSSCG00000020963	0.381233	0.211788	EPDR1	28.3995	42.4245	-0.579029	1.57e-14	four	18184653	0.732268	0.351034	0.381233	0.211788	1.80007	0.0505664	0.0593436	0.0718502	0.504521	119465193	promoter-TSS (ENSSSCT00000031911)	-280	ENSSSCT00000031911	EPDR1
chr9	137137632	137137633	0.625	1	0.1875	1	0.7692	0.2	ENSSSCG00000015559	0.19566	0.0683955	NCF2	1.12585	2.45829	-1.12665	0.000243994	four	18294994	0.55902	0.36336	0.19566	0.0683955	2.86072	0.0746312	0.0476464	0.00422685	0.0953392	137137633	promoter-TSS (ENSSSCT00000016949)	-166	ENSSSCT00000016949	NCF2	neutrophil cytosolic factor 2
chr9	137137699	137137700	0.88	0.8182	1	1	0.6364	0.0667	ENSSSCG00000015559	0.199784	0.084829	NCF2	1.12585	2.45829	-1.12665	0.000243994	four	18294996	0.577414	0.37763	0.199784	0.084829	2.35514	0.0637349	0.109224	0.0185156	0.24412	137137700	promoter-TSS (ENSSSCT00000016949)	-233	ENSSSCT00000016949	NCF2	neutrophil cytosolic factor 2
chr9	137137703	137137704	0.86	0.5833	0.5	1	0.2727	0.3571	ENSSSCG00000015559	0.170791	0.0876217	NCF2	1.12585	2.45829	-1.12665	0.000243994	four	18294997	0.573024	0.402233	0.170791	0.0876217	1.94918	0.0562866	0.0610586	0.0512735	0.427977	137137704	promoter-TSS (ENSSSCT00000016949)	-237	ENSSSCT00000016949	NCF2	neutrophil cytosolic factor 2
chr9	137137740	137137741	0.9231	0.5455	0	1	0.4091	0.2727	ENSSSCG00000015559	0.170791	0.0563109	NCF2	1.12585	2.45829	-1.12665	0.000243994	four	18294998	0.573024	0.402233	0.170791	0.0563109	3.033	0.0720075	0.0646649	0.00242139	0.0650708	137137741	promoter-TSS (ENSSSCT00000016949)	-274	ENSSSCT00000016949	NCF2	neutrophil cytosolic factor 2
chr9	137137742	137137743	1	0.6842	0	0.8947	0.6538	0.2727	ENSSSCG00000015559	0.170791	0.0673373	NCF2	1.12585	2.45829	-1.12665	0.000243994	four	18294999	0.573024	0.402233	0.170791	0.0673373	2.53635	0.064639	0.0646649	0.0112015	0.179742	137137743	promoter-TSS (ENSSSCT00000016949)	-276	ENSSSCT00000016949	NCF2	neutrophil cytosolic factor 2
chr9	146244088	146244089	1	0	0.8519	0.5	0.8571	0.8889	ENSSSCG00000015612	0.149299	0.065668	IRF6	0.472259	0.787405	-0.737526	0.0388284	four	18374389	0.798756	0.649456	0.149299	0.065668	2.27355	0.136535	0.16644	0.022993	0.27707	146244089	promoter-TSS (ENSSSCT00000035516)	-557	ENSSSCT00000035516	IRF6
chr9	146244100	146244101	0.9412	0	0.9259	0.3	0.6667	0.7222	ENSSSCG00000015612	0.149299	0.0769218	IRF6	0.472259	0.787405	-0.737526	0.0388284	four	18374390	0.798756	0.649456	0.149299	0.0769218	1.94092	0.0485317	0.115324	0.0522674	0.432132	146244101	promoter-TSS (ENSSSCT00000035516)	-545	ENSSSCT00000035516	IRF6
chr9	146244110	146244111	1	0	0.8462	0.68	1	0.8889	ENSSSCG00000015612	0.149299	0.0772486	IRF6	0.472259	0.787405	-0.737526	0.0388284	four	18374391	0.798756	0.649456	0.149299	0.0772486	1.93271	0.0552373	0.104307	0.0532715	0.436272	146244111	promoter-TSS (ENSSSCT00000035516)	-535	ENSSSCT00000035516	IRF6
chr9	146244133	146244134	0.9677	0	1	0.8529	0.7895	0.5882	ENSSSCG00000015612	0.108298	0.0746638	IRF6	0.472259	0.787405	-0.737526	0.0388284	four	18374392	0.771879	0.663581	0.108298	0.0746638	1.45047	0.13498	0.0422628	0.146928	0.681495	146244134	promoter-TSS (ENSSSCT00000035516)	-512	ENSSSCT00000035516	IRF6
chr9	146244134	146244135	1	0.5	0.7857	1	0.5455	0.7143	ENSSSCG00000015612	0.108298	0.0335562	IRF6	0.472259	0.787405	-0.737526	0.0388284	four	18374393	0.771879	0.663581	0.108298	0.0335562	3.22735	0.0746312	0.0585736	0.00124942	0.0407951	146244135	promoter-TSS (ENSSSCT00000035516)	-511	ENSSSCT00000035516	IRF6
chr9	153208821	153208822	0.8333	0.8	1	0.9783	0.2	0.75	ENSSSCG00000015636	0.192442	0.0816898	VSTM2A	35.0658	53.363	-0.605775	6.98e-26	four	18490287	0.493813	0.301371	0.192442	0.0816898	2.35576	0.143149	0.186533	0.0184848	0.243879	153208822	promoter-TSS (ENSSSCT00000027722)	-798	ENSSSCT00000017032	VSTM2A
chr9	153208831	153208832	0.5385	0.3889	0.7778	1	0.2353	0.8333	ENSSSCG00000015636	0.192442	0.0751206	VSTM2A	35.0658	53.363	-0.605775	6.98e-26	four	18490289	0.493813	0.301371	0.192442	0.0751206	2.56177	0.19811	0.254514	0.010414	0.171733	153208832	promoter-TSS (ENSSSCT00000027722)	-788	ENSSSCT00000017032	VSTM2A
chr9	50686117	50686118	0.6	1	0.7647	0.9412	0.875	0.4	ENSSSCG00000015094	0.128518	0.0702821	CD3G	0.444659	1.04203	-1.22863	0.00107458	four	17768544	0.733744	0.605226	0.128518	0.0702821	1.82861	0.0789059	0.0610602	0.0674583	0.48971	50686118	promoter-TSS (ENSSSCT00000035817)	-269	ENSSSCT00000016460	CD3G	T-cell surface glycoprotein CD3 gamma chain
chr9	50686169	50686170	0.9091	1	0.9355	0.8333	0.9	0.6154	ENSSSCG00000015094	0.123895	0.0742151	CD3G	0.444659	1.04203	-1.22863	0.00107458	four	17768545	0.734439	0.610544	0.123895	0.0742151	1.66941	0.391417	0.0734874	0.095036	0.572089	50686170	promoter-TSS (ENSSSCT00000035817)	-217	ENSSSCT00000016460	CD3G	T-cell surface glycoprotein CD3 gamma chain
chr9	50686183	50686184	1	0.7143	1	1	0.9	0.7778	ENSSSCG00000015094	0.123895	0.106077	CD3G	0.444659	1.04203	-1.22863	0.00107458	four	17768546	0.734439	0.610544	0.123895	0.106077	1.16797	0.061419	0.0700575	0.242818	0.803871	50686184	promoter-TSS (ENSSSCT00000035817)	-203	ENSSSCT00000016460	CD3G	T-cell surface glycoprotein CD3 gamma chain
chrX	101558178	101558179	0.6667	0.8	0.7	0.9412	0.2	0.5333	ENSSSCG00000012551	0.102076	0.17517	RNF128	58.4653	83.3231	-0.511134	4.82e-18	four	18851158	0.569843	0.467766	0.102076	0.17517	0.582729	0.140301	0.087652	0.560076	0.95429	101558179	promoter-TSS (ENSSSCT00000013723)	-578	ENSSSCT00000013723	RNF128
chrX	101558697	101558698	0.9091	1	0.9231	0.8889	0.3	0	ENSSSCG00000012551	0.111829	0.0786055	RNF128	58.4653	83.3231	-0.511134	4.82e-18	four	18851170	0.202517	0.090688	0.111829	0.0786055	1.42266	0.101598	0.120571	0.154833	0.694672	101558698	promoter-TSS (ENSSSCT00000013723)	-59	ENSSSCT00000013723	RNF128
chrX	101558704	101558705	0.1	0.9545	1	1	0.6429	0	ENSSSCG00000012551	0.111829	0.0361577	RNF128	58.4653	83.3231	-0.511134	4.82e-18	four	18851171	0.202517	0.090688	0.111829	0.0361577	3.09282	0.0746312	0.126117	0.00198262	0.0565884	101558705	promoter-TSS (ENSSSCT00000013723)	-52	ENSSSCT00000013723	RNF128
chrX	101558746	101558747	0.3636	0.8654	0	0.9167	0.8	0	ENSSSCG00000012551	0.122066	0.0769458	RNF128	58.4653	83.3231	-0.511134	4.82e-18	four	18851172	0.196205	0.0741391	0.122066	0.0769458	1.58639	0.104153	0.0946319	0.112651	0.614351	101558747	promoter-TSS (ENSSSCT00000013723)	-10	ENSSSCT00000013723	RNF128
chrX	101558754	101558755	0.7895	0.9	0.8824	0.6364	0.9	0	ENSSSCG00000012551	0.13352	0.033905	RNF128	58.4653	83.3231	-0.511134	4.82e-18	four	18851173	0.207003	0.0734825	0.13352	0.033905	3.93808	0.0746312	0.0958072	8.21e-05	0.00532353	101558755	promoter-TSS (ENSSSCT00000013723)	-2	ENSSSCT00000013723	RNF128
chrX	113557635	113557636	0.875	0.6667	0.7143	0.3333	0.9167	0	ENSSSCG00000012619	0.119823	0.0273254	2021-09-06	5.44025	7.72366	-0.505612	4.18e-11	four	18891335	0.239112	0.119289	0.119823	0.0273254	4.38504	0.0746312	0.201858	1.16e-05	0.0011336	113557636	promoter-TSS (ENSSSCT00000033202)	-996	ENSSSCT00000033516	2021-09-06	septin 6/8/11
chrX	113557655	113557656	0.3	0.8182	1	0.7241	0.8889	0.2667	ENSSSCG00000012619	0.114684	0.0315999	2021-09-06	5.44025	7.72366	-0.505612	4.18e-11	four	18891336	0.234821	0.120137	0.114684	0.0315999	3.62923	0.0746312	0.0684059	0.000284266	0.0137501	113557656	promoter-TSS (ENSSSCT00000033202)	-976	ENSSSCT00000033516	2021-09-06	septin 6/8/11
chrX	113557680	113557681	0.6842	1	1	0.9231	0.8889	0.25	ENSSSCG00000012619	0.114863	0.0619599	2021-09-06	5.44025	7.72366	-0.505612	4.18e-11	four	18891337	0.227789	0.112926	0.114863	0.0619599	1.85383	0.0590204	0.0687308	0.0637631	0.476638	113557681	promoter-TSS (ENSSSCT00000033202)	-951	ENSSSCT00000033516	2021-09-06	septin 6/8/11
chrX	113557693	113557694	0.3333	0.6154	1	0.8125	0.9	0.2	ENSSSCG00000012619	0.110386	0.0778424	2021-09-06	5.44025	7.72366	-0.505612	4.18e-11	four	18891338	0.222986	0.1126	0.110386	0.0778424	1.41807	0.104193	0.0652678	0.15617	0.696835	113557694	promoter-TSS (ENSSSCT00000033202)	-938	ENSSSCT00000033516	2021-09-06	septin 6/8/11
chrX	113557709	113557710	0.4118	0.7368	0.8	1	0.9091	0.125	ENSSSCG00000012619	0.118387	0.0712571	2021-09-06	5.44025	7.72366	-0.505612	4.18e-11	four	18891339	0.227739	0.109352	0.118387	0.0712571	1.66141	0.192564	0.091623	0.0966307	0.576167	113557710	promoter-TSS (ENSSSCT00000033202)	-922	ENSSSCT00000033516	2021-09-06	septin 6/8/11
chrX	113557740	113557741	0.4615	0.5	0.6667	0.5882	0.8	0.1111	ENSSSCG00000012619	0.118387	0.0725709	2021-09-06	5.44025	7.72366	-0.505612	4.18e-11	four	18891340	0.227739	0.109352	0.118387	0.0725709	1.63133	0.0587175	0.0480764	0.10282	0.591516	113557741	promoter-TSS (ENSSSCT00000033202)	-891	ENSSSCT00000033516	2021-09-06	septin 6/8/11
chrX	113557757	113557758	0.3	0.1667	1	1	0.8	0.0476	ENSSSCG00000012619	0.113043	0.0702504	2021-09-06	5.44025	7.72366	-0.505612	4.18e-11	four	18891341	0.22263	0.109587	0.113043	0.0702504	1.60914	0.355231	0.0991281	0.107586	0.602869	113557758	promoter-TSS (ENSSSCT00000033202)	-874	ENSSSCT00000033516	2021-09-06	septin 6/8/11
chrX	113557766	113557767	0.1111	0.6	1	1	0.8182	0.1905	ENSSSCG00000012619	0.109657	0.0805751	2021-09-06	5.44025	7.72366	-0.505612	4.18e-11	four	18891342	0.217422	0.107765	0.109657	0.0805751	1.36092	0.0967543	0.097208	0.173538	0.723012	113557767	promoter-TSS (ENSSSCT00000033202)	-865	ENSSSCT00000033516	2021-09-06	septin 6/8/11
chrX	113558162	113558163	0.2353	0.6667	0.8	0.8462	0.8	0	ENSSSCG00000012619	0.126222	0.0969341	2021-09-06	5.44025	7.72366	-0.505612	4.18e-11	four	18891347	0.281731	0.155509	0.126222	0.0969341	1.30214	0.132927	0.0713975	0.192868	0.749024	113558163	promoter-TSS (ENSSSCT00000033202)	-469	ENSSSCT00000033516	2021-09-06	septin 6/8/11
chrX	113558168	113558169	0.0952	0.4	1	0.8462	0.4706	0	ENSSSCG00000012619	0.112075	0.0949209	2021-09-06	5.44025	7.72366	-0.505612	4.18e-11	four	18891348	0.263441	0.151366	0.112075	0.0949209	1.18072	0.0866483	0.0534672	0.237714	0.799045	113558169	promoter-TSS (ENSSSCT00000033202)	-463	ENSSSCT00000033516	2021-09-06	septin 6/8/11
chrX	113558187	113558188	0.3077	1	0.9355	0.8462	0.6429	0	ENSSSCG00000012619	0.112075	0.0430264	2021-09-06	5.44025	7.72366	-0.505612	4.18e-11	four	18891349	0.263441	0.151366	0.112075	0.0430264	2.6048	0.0746312	0.147454	0.00919291	0.158705	113558188	promoter-TSS (ENSSSCT00000033202)	-444	ENSSSCT00000033516	2021-09-06	septin 6/8/11
chrX	113558190	113558191	0	1	0.913	0.8462	0.8182	0	ENSSSCG00000012619	0.112075	0.0854237	2021-09-06	5.44025	7.72366	-0.505612	4.18e-11	four	18891350	0.263441	0.151366	0.112075	0.0854237	1.31199	0.135109	0.364332	0.189524	0.744767	113558191	promoter-TSS (ENSSSCT00000033202)	-441	ENSSSCT00000033516	2021-09-06	septin 6/8/11
chrX	113558197	113558198	0	0.8889	0.7619	1	0.5	0	ENSSSCG00000012619	0.112075	0.0891465	2021-09-06	5.44025	7.72366	-0.505612	4.18e-11	four	18891351	0.263441	0.151366	0.112075	0.0891465	1.2572	0.135109	0.107318	0.208682	0.768216	113558198	promoter-TSS (ENSSSCT00000033202)	-434	ENSSSCT00000033516	2021-09-06	septin 6/8/11
chrX	113558203	113558204	0	0.8182	0.7857	1	0.8333	0	ENSSSCG00000012619	0.112075	0.0468672	2021-09-06	5.44025	7.72366	-0.505612	4.18e-11	four	18891352	0.263441	0.151366	0.112075	0.0468672	2.39133	0.0746312	0.0821587	0.0167874	0.230271	113558204	promoter-TSS (ENSSSCT00000033202)	-428	ENSSSCT00000033516	2021-09-06	septin 6/8/11
chrX	113558210	113558211	0	1	0.9655	0.9412	0.0769	0	ENSSSCG00000012619	0.112075	0.0420469	2021-09-06	5.44025	7.72366	-0.505612	4.18e-11	four	18891353	0.263441	0.151366	0.112075	0.0420469	2.66547	0.0746312	0.171584	0.00768806	0.141516	113558211	promoter-TSS (ENSSSCT00000033202)	-421	ENSSSCT00000033516	2021-09-06	septin 6/8/11
chrX	113564883	113564884	0.6944	0.9	1	0.1667	1	0.7143	ENSSSCG00000012619	0.134381	0.0694607	2021-09-06	5.44025	7.72366	-0.505612	4.18e-11	four	18891402	0.858847	0.724465	0.134381	0.0694607	1.93464	0.0649382	0.0431811	0.0530347	0.435299	113564884	promoter-TSS (ENSSSCT00000034767)	-303	ENSSSCT00000034767	2021-09-06	septin 6/8/11
chrX	113564889	113564890	0.6364	1	0.9412	0.8182	1	0.7692	ENSSSCG00000012619	0.134381	0.0667728	2021-09-06	5.44025	7.72366	-0.505612	4.18e-11	four	18891403	0.858847	0.724465	0.134381	0.0667728	2.01252	0.0532293	0.0433863	0.0441654	0.396482	113564890	promoter-TSS (ENSSSCT00000034767)	-297	ENSSSCT00000034767	2021-09-06	septin 6/8/11
chrX	113564892	113564893	0.6667	1	0.875	0.2143	1	1	ENSSSCG00000012619	0.134381	0.0600292	2021-09-06	5.44025	7.72366	-0.505612	4.18e-11	four	18891404	0.858847	0.724465	0.134381	0.0600292	2.2386	0.0943501	0.0934103	0.025182	0.291876	113564893	promoter-TSS (ENSSSCT00000034767)	-294	ENSSSCT00000034767	2021-09-06	septin 6/8/11
chrX	124830055	124830056	0.963	1	0.84	1	1	0.8182	ENSSSCG00000021375	0.105126	0.109089	HS6ST2	5.6521	8.01162	-0.503307	8.92e-07	four	18931709	0.977845	0.87272	0.105126	0.109089	0.96367	0.0746312	0.0568522	0.335211	0.872462	124830056	promoter-TSS (ENSSSCT00000035047)	-735	ENSSSCT00000035047	HS6ST2	heparan sulfate 6-O-sulfotransferase HS6ST2 [EC:2.8.2.-]
chrX	125078910	125078911	1	0.9615	0	1	0.5	0.4	ENSSSCG00000021375	0.158075	0.119551	HS6ST2	5.6521	8.01162	-0.503307	8.92e-07	four	18934037	0.67684	0.518765	0.158075	0.119551	1.32224	0.0599809	0.0495747	0.186087	0.74022	125078911	promoter-TSS (ENSSSCT00000022541)	-666	ENSSSCT00000036157	HS6ST2	heparan sulfate 6-O-sulfotransferase HS6ST2 [EC:2.8.2.-]
chrX	125078919	125078920	0.9091	0.8571	0	0.6154	0.6	0.4	ENSSSCG00000021375	0.158075	0.123388	HS6ST2	5.6521	8.01162	-0.503307	8.92e-07	four	18934038	0.67684	0.518765	0.158075	0.123388	1.28113	0.0656363	0.0449204	0.200148	0.758094	125078920	promoter-TSS (ENSSSCT00000022541)	-675	ENSSSCT00000036157	HS6ST2	heparan sulfate 6-O-sulfotransferase HS6ST2 [EC:2.8.2.-]
chrX	133683174	133683175	0.8	1	0.9	0.5652	0.7857	0.3846	ENSSSCG00000022091	0.20477	0.148609	SLITRK4	9.51017	14.7553	-0.633688	1.52e-15	four	18978829	0.560857	0.356087	0.20477	0.148609	1.37791	0.068158	0.051213	0.168232	0.715339	133683175	promoter-TSS (ENSSSCT00000023710)	-219	ENSSSCT00000023710	SLITRK4
chrX	4157106	4157107	1	1	0.925	1	0.8333	0.2	ENSSSCG00000026520	0.136682	0.132806	STS	4.41318	6.8237	-0.628737	6.37e-11	four	18541494	0.625597	0.488916	0.136682	0.132806	1.02918	0.063854	0.0890369	0.303394	0.852526	4157107	promoter-TSS (ENSSSCT00000035627)	-570	ENSSSCT00000035627	STS	steryl-sulfatase
chrX	4157542	4157543	0.9333	0.6364	0.9211	1	0.9583	0.3333	ENSSSCG00000026520	0.201785	0.131706	STS	4.41318	6.8237	-0.628737	6.37e-11	four	18541499	0.711351	0.509566	0.201785	0.131706	1.53209	0.0480174	0.0672126	0.125501	0.64166	4157543	promoter-TSS (ENSSSCT00000035627)	-134	ENSSSCT00000035627	STS	steryl-sulfatase
chrX	4157601	4157602	1	0.4	0.7812	1	0.9048	0.6667	ENSSSCG00000026520	0.201785	0.102652	STS	4.41318	6.8237	-0.628737	6.37e-11	four	18541500	0.711351	0.509566	0.201785	0.102652	1.96572	0.0665623	0.0696378	0.0493305	0.419701	4157602	promoter-TSS (ENSSSCT00000035627)	-75	ENSSSCT00000035627	STS	steryl-sulfatase
chrX	53144734	53144735	0.931	0.8077	0.8	0.8125	0.5	0.6	ENSSSCG00000029757	0.146762	0.149776	CH242-193E13.5	2.8115	4.10481	-0.545977	0.0375886	four	18771761	0.82972	0.682958	0.146762	0.149776	0.979879	0.0583741	0.0594974	0.327146	0.867711	53144735	promoter-TSS (ENSSSCT00000025577)	-345	ENSSSCT00000025577	CH242-193E13.5
chrX	53144762	53144763	0.7576	0.625	1	0.7857	0.7647	0.8	ENSSSCG00000029757	0.146762	0.116746	CH242-193E13.5	2.8115	4.10481	-0.545977	0.0375886	four	18771763	0.82972	0.682958	0.146762	0.116746	1.25711	0.0746312	0.0651374	0.208713	0.76825	53144763	promoter-TSS (ENSSSCT00000025577)	-373	ENSSSCT00000025577	CH242-193E13.5
chrX	53144770	53144771	0.8571	0.7143	0.1818	0.4286	0.7778	0.6	ENSSSCG00000029757	0.146762	0.117488	CH242-193E13.5	2.8115	4.10481	-0.545977	0.0375886	four	18771764	0.82972	0.682958	0.146762	0.117488	1.24916	0.0746312	0.0594974	0.211605	0.77155	53144771	promoter-TSS (ENSSSCT00000025577)	-381	ENSSSCT00000025577	CH242-193E13.5
chrX	53832112	53832113	0.2692	0.6	0.7308	0.6667	1	0.6	ENSSSCG00000012347	0.143707	0.0615733	ALAS2	0.333737	0.669581	-1.00455	0.00542755	four	18773395	0.837029	0.693323	0.143707	0.0615733	2.33391	0.0746312	0.0600075	0.0196004	0.252468	53832113	promoter-TSS (ENSSSCT00000036160)	13	ENSSSCT00000036484	ALAS2	5-aminolevulinate synthase
chrX	53832116	53832117	0.625	0.3636	0.5455	0.4	0.7143	0.8	ENSSSCG00000012347	0.143707	0.0613393	ALAS2	0.333737	0.669581	-1.00455	0.00542755	four	18773396	0.837029	0.693323	0.143707	0.0613393	2.34281	0.0746312	0.064025	0.0191389	0.248946	53832117	promoter-TSS (ENSSSCT00000036160)	9	ENSSSCT00000036484	ALAS2	5-aminolevulinate synthase
chrX	53832120	53832121	0.0714	0.2308	0.8182	0.8333	0.8571	0.8	ENSSSCG00000012347	0.143707	0.0613393	ALAS2	0.333737	0.669581	-1.00455	0.00542755	four	18773397	0.837029	0.693323	0.143707	0.0613393	2.34281	0.0746312	0.064025	0.0191389	0.248946	53832121	promoter-TSS (ENSSSCT00000036160)	5	ENSSSCT00000036484	ALAS2	5-aminolevulinate synthase
chrX	53832123	53832124	0.84	0.25	0.3636	0.8182	0.9231	0.6	ENSSSCG00000012347	0.143707	0.0615733	ALAS2	0.333737	0.669581	-1.00455	0.00542755	four	18773398	0.837029	0.693323	0.143707	0.0615733	2.33391	0.0746312	0.0600075	0.0196004	0.252468	53832124	promoter-TSS (ENSSSCT00000036160)	2	ENSSSCT00000036484	ALAS2	5-aminolevulinate synthase
chrX	53832189	53832190	0.9355	0.2727	0.7273	0.6275	0.6	0.75	ENSSSCG00000012347	0.143707	0.165775	ALAS2	0.333737	0.669581	-1.00455	0.00542755	four	18773399	0.837029	0.693323	0.143707	0.165775	0.866877	0.0752589	0.0487574	0.386009	0.898729	53832190	promoter-TSS (ENSSSCT00000036160)	-57	ENSSSCT00000013502	ALAS2	5-aminolevulinate synthase
chrX	5563422	5563423	0.9167	0.8621	0.95	1	1	0.8	ENSSSCG00000012101	0.189803	0.0896384	ANOS1	25.0473	41.1914	-0.717687	3.1e-26	four	18560573	0.580641	0.390839	0.189803	0.0896384	2.11743	0.109592	0.187372	0.0342237	0.346179	5563423	promoter-TSS (ENSSSCT00000013235)	-851	ENSSSCT00000013235	KAL1
chrX	56722962	56722963	0.6364	0.8889	0.8125	0.4	1	0	ENSSSCG00000012362	0.109822	0.132296	ARHGEF9	51.8637	75.2275	-0.536536	0.000186989	four	18777446	0.189302	0.0794804	0.109822	0.132296	0.830123	0.104359	0.0938927	0.406469	0.907632	56722963	promoter-TSS (ENSSSCT00000033580)	10	ENSSSCT00000033580	ARHGEF9
chr10	15041427	15041428	1	0.5	0.9286	0.8261	0.7812	0.8571	ENSSSCG00000024484	-0.103796	0.0407992	DEGS1	55.4633	38.2509	0.536038	1.08e-14	two	2014183	0.850589	0.954385	-0.103796	0.0407992	-2.54408	0.17499	0.0596079	0.0109567	0.177274	15041428	promoter-TSS (ENSSSCT00000025010)	-921	ENSSSCT00000025010	DEGS1	sphingolipid delta-4 desaturase [EC:1.14.-.-]
chr10	15041450	15041451	1	1	0.8519	0.6471	0.9048	1	ENSSSCG00000024484	-0.103796	0.0483189	DEGS1	55.4633	38.2509	0.536038	1.08e-14	two	2014184	0.850589	0.954385	-0.103796	0.0483189	-2.14815	0.0604862	0.081786	0.0317018	0.331963	15041451	promoter-TSS (ENSSSCT00000025010)	-898	ENSSSCT00000025010	DEGS1	sphingolipid delta-4 desaturase [EC:1.14.-.-]
chr10	15041484	15041485	1	1	0.8788	0.8	1	1	ENSSSCG00000024484	-0.103796	0.0518356	DEGS1	55.4633	38.2509	0.536038	1.08e-14	two	2014186	0.850589	0.954385	-0.103796	0.0518356	-2.00242	0.0769957	0.0956543	0.0452401	0.401446	15041485	promoter-TSS (ENSSSCT00000025010)	-864	ENSSSCT00000025010	DEGS1	sphingolipid delta-4 desaturase [EC:1.14.-.-]
chr10	171003	171004	0.9375	1	1	0.5625	0.6667	0.6667	ENSSSCG00000010799	-0.16617	0.107779	COG7	29.8424	14.131	1.0785	3.56e-43	two	1864860	0.608793	0.774963	-0.16617	0.107779	-1.54176	0.0929512	0.126069	0.123132	0.636889	171004	promoter-TSS (ENSSSCT00000011815)	-585	ENSSSCT00000011815	COG7
chr10	171013	171014	0.2857	0.8	1	0.6667	0.4667	1	ENSSSCG00000010799	-0.16617	0.101109	COG7	29.8424	14.131	1.0785	3.56e-43	two	1864861	0.608793	0.774963	-0.16617	0.101109	-1.64348	0.0781388	0.129679	0.100284	0.585328	171014	promoter-TSS (ENSSSCT00000011815)	-575	ENSSSCT00000011815	COG7
chr10	24500591	24500592	0.8947	0.4545	0.6667	0.8	1	0.4	ENSSSCG00000010894	-0.120192	0.136225	TP53BP2	86.8124	45.9392	0.918177	3.21e-62	two	2109887	0.712211	0.832403	-0.120192	0.136225	-0.8823	0.0636261	0.111883	0.377615	0.894809	24500592	promoter-TSS (ENSSSCT00000011919)	-24	ENSSSCT00000011919	TP53BP2	apoptosis-stimulating of p53 protein 2
chr10	24657355	24657356	1	0.625	1	0.8947	0.8667	0.8	ENSSSCG00000010896	-0.118213	0.113858	ASPM	0.821391	0.529229	0.634178	0.0273533	two	2113219	0.747095	0.865308	-0.118213	0.113858	-1.03825	0.683477	0.0576678	0.299154	0.84969	24657356	promoter-TSS (ENSSSCT00000011921)	50	ENSSSCT00000011921	ASPM
chr10	24657359	24657360	0.9487	0.9444	1	1	1	1	ENSSSCG00000010896	-0.11072	0.108648	ASPM	0.821391	0.529229	0.634178	0.0273533	two	2113220	0.77913	0.889851	-0.11072	0.108648	-1.01908	0.480887	0.0922869	0.308166	0.855709	24657360	promoter-TSS (ENSSSCT00000011921)	46	ENSSSCT00000011921	ASPM
chr10	28706884	28706885	0.6463	0.8571	0.8182	0.9167	1	0.9394	ENSSSCG00000022056	-0.108392	0.041491	GPR37L1	11.3113	5.88273	0.94321	4.13e-09	two	2158109	0.785632	0.894024	-0.108392	0.041491	-2.61243	0.145829	0.0472504	0.00899007	0.156469	28706885	promoter-TSS (ENSSSCT00000032457)	-814	ENSSSCT00000032457	GPR37L1
chr10	28706906	28706907	0.8132	0.0588	0.8462	1	0.7333	1	ENSSSCG00000022056	-0.108392	0.044704	GPR37L1	11.3113	5.88273	0.94321	4.13e-09	two	2158110	0.785632	0.894024	-0.108392	0.044704	-2.42467	0.0599602	0.0789301	0.0153223	0.217933	28706907	promoter-TSS (ENSSSCT00000032457)	-792	ENSSSCT00000032457	GPR37L1
chr10	28706917	28706918	0.2842	0.7619	0.8571	0.8	0.6923	0.931	ENSSSCG00000022056	-0.108392	0.0419067	GPR37L1	11.3113	5.88273	0.94321	4.13e-09	two	2158111	0.785632	0.894024	-0.108392	0.0419067	-2.58651	0.080734	0.076535	0.00969521	0.164162	28706918	promoter-TSS (ENSSSCT00000032457)	-781	ENSSSCT00000032457	GPR37L1
chr10	28706970	28706971	0.2653	0.7143	0.8276	1	0.871	0.7895	ENSSSCG00000022056	-0.112436	0.0481977	GPR37L1	11.3113	5.88273	0.94321	4.13e-09	two	2158112	0.756672	0.869108	-0.112436	0.0481977	-2.3328	0.044748	0.0415978	0.0196585	0.252898	28706971	promoter-TSS (ENSSSCT00000032457)	-728	ENSSSCT00000032457	GPR37L1
chr11	24964363	24964364	0.8421	1	1	0.7778	0.9048	1	ENSSSCG00000009428	-0.157278	0.122737	FAM216B	2.27835	1.1211	1.02308	4.94e-05	two	2934982	0.777403	0.934681	-0.157278	0.122737	-1.28142	0.0541861	0.0794022	0.200045	0.757975	24964364	promoter-TSS (ENSSSCT00000010335)	-252	ENSSSCT00000010335	FAM216B
chr1	158363445	158363446	1	0.75	0	0.8333	0.8667	0.3	ENSSSCG00000004836	-0.15613	0.0629744	MKRN3	5.36315	2.99154	0.842189	2.2e-05	two	940004	0.349751	0.50588	-0.15613	0.0629744	-2.47926	0.0603175	0.104751	0.0131656	0.19871	158363446	promoter-TSS (ENSSSCT00000005338)	31	ENSSSCT00000005338	MKRN3
chr1	158363507	158363508	1	0.8333	0	0.8214	0.75	0.4286	ENSSSCG00000004836	-0.118717	0.030161	MKRN3	5.36315	2.99154	0.842189	2.2e-05	two	940006	0.433412	0.552129	-0.118717	0.030161	-3.93611	0.0746312	0.101162	8.28e-05	0.00535737	158363508	promoter-TSS (ENSSSCT00000005338)	-31	ENSSSCT00000005338	MKRN3
chr1	158363518	158363519	0.4	0.8333	0	0.902	0.7895	0.4286	ENSSSCG00000004836	-0.103829	0.0290954	MKRN3	5.36315	2.99154	0.842189	2.2e-05	two	940008	0.442867	0.546696	-0.103829	0.0290954	-3.56857	0.0746312	0.0857499	0.000358932	0.016378	158363519	promoter-TSS (ENSSSCT00000005338)	-42	ENSSSCT00000005338	MKRN3
chr1	182181308	182181309	0.7925	1	0.6364	0.9355	0.4737	0.8	ENSSSCG00000023980	-0.149319	0.0864366	SNAPC5	4.2035	2.96606	0.503045	0.00284217	two	1074319	0.586086	0.735405	-0.149319	0.0864366	-1.72749	0.0746312	0.0603653	0.0840793	0.542084	182181309	promoter-TSS (ENSSSCT00000025296)	-245	ENSSSCT00000025296	SNAPC5
chr1	182181316	182181317	0.9492	0.6667	0.9	0.9375	0.7333	0.6	ENSSSCG00000023980	-0.149319	0.0862016	SNAPC5	4.2035	2.96606	0.503045	0.00284217	two	1074321	0.586086	0.735405	-0.149319	0.0862016	-1.7322	0.0746312	0.0633477	0.0832376	0.539664	182181317	promoter-TSS (ENSSSCT00000025296)	-237	ENSSSCT00000025296	SNAPC5
chr12	24290456	24290457	0.8846	0.9211	0.7273	1	0.8182	0.6154	ENSSSCG00000017526	-0.192	0.0834146	COPZ2	4.68213	2.87106	0.70558	0.00268168	two	3669221	0.247679	0.439679	-0.192	0.0834146	-2.30176	0.258115	0.067872	0.021349	0.265424	24290457	promoter-TSS (ENSSSCT00000019080)	-682	ENSSSCT00000019080	COPZ2
chr12	24290483	24290484	0.8571	1	0.8	1	0.8462	0.5625	ENSSSCG00000017526	-0.208162	0.0960626	COPZ2	4.68213	2.87106	0.70558	0.00268168	two	3669222	0.243531	0.451694	-0.208162	0.0960626	-2.16694	0.0609747	0.0542544	0.0302392	0.323428	24290484	promoter-TSS (ENSSSCT00000019080)	-709	ENSSSCT00000019080	COPZ2
chr12	36033444	36033445	0.5789	0.875	0.55	0.8571	0.8182	0.2857	ENSSSCG00000017643	-0.100278	0.0505606	2021-09-04	158.132	71.025	1.15473	1.52e-93	two	3750029	0.275186	0.375464	-0.100278	0.0505606	-1.98333	0.0494476	0.0503663	0.047331	0.410884	36033445	promoter-TSS (ENSSSCT00000019205)	-201	ENSSSCT00000019205	2021-09-04	septin 4
chr12	36033453	36033454	0.7647	0.6	0.8889	0.8889	0.5625	0.5385	ENSSSCG00000017643	-0.100278	0.0487458	2021-09-04	158.132	71.025	1.15473	1.52e-93	two	3750030	0.275186	0.375464	-0.100278	0.0487458	-2.05717	0.04285	0.0740906	0.0396702	0.374795	36033454	promoter-TSS (ENSSSCT00000019205)	-192	ENSSSCT00000019205	2021-09-04	septin 4
chr12	36033455	36033456	0.875	0.75	0.8235	1	0.7	0.16	ENSSSCG00000017643	-0.100278	0.0438806	2021-09-04	158.132	71.025	1.15473	1.52e-93	two	3750031	0.275186	0.375464	-0.100278	0.0438806	-2.28525	0.0842003	0.115501	0.0222981	0.272231	36033456	promoter-TSS (ENSSSCT00000019205)	-190	ENSSSCT00000019205	2021-09-04	septin 4
chr12	36033463	36033464	0.5833	0.625	0.9375	0.9412	0.9091	0.4444	ENSSSCG00000017643	-0.100278	0.0468093	2021-09-04	158.132	71.025	1.15473	1.52e-93	two	3750032	0.275186	0.375464	-0.100278	0.0468093	-2.14227	0.0431512	0.0495012	0.0321715	0.334682	36033464	promoter-TSS (ENSSSCT00000019205)	-182	ENSSSCT00000019205	2021-09-04	septin 4
chr12	36033499	36033500	0.8333	1	1	0.875	0.8462	0.4667	ENSSSCG00000017643	-0.100278	0.0374813	2021-09-04	158.132	71.025	1.15473	1.52e-93	two	3750033	0.275186	0.375464	-0.100278	0.0374813	-2.67542	0.0479168	0.0587914	0.00746359	0.138846	36033500	promoter-TSS (ENSSSCT00000019205)	-146	ENSSSCT00000019205	2021-09-04	septin 4
chr1	249907940	249907941	1	0.8571	1	0.5833	0.9333	1	ENSSSCG00000030655	-0.160455	0.0972578	MAMDC2	5.28606	1.77771	1.57217	2.62e-09	two	1379690	0.697541	0.857996	-0.160455	0.0972578	-1.64979	0.0942687	0.21871	0.0989855	0.582085	249907941	promoter-TSS (ENSSSCT00000030492)	-901	ENSSSCT00000030492	MAMDC2
chr1	249907946	249907947	1	0.8571	0.7917	0.8571	1	0.9231	ENSSSCG00000030655	-0.160455	0.0696069	MAMDC2	5.28606	1.77771	1.57217	2.62e-09	two	1379691	0.697541	0.857996	-0.160455	0.0696069	-2.30516	0.370074	0.114133	0.0211575	0.264026	249907947	promoter-TSS (ENSSSCT00000030492)	-907	ENSSSCT00000030492	MAMDC2
chr1	249908029	249908030	1	1	0.7273	0.5455	0.9592	0	ENSSSCG00000030655	-0.147044	0.0745035	MAMDC2	5.28606	1.77771	1.57217	2.62e-09	two	1379692	0.689521	0.836565	-0.147044	0.0745035	-1.97365	0.989475	0.748366	0.0484216	0.415725	249908030	promoter-TSS (ENSSSCT00000030492)	-990	ENSSSCT00000030492	MAMDC2
chr12	51529577	51529578	0.8333	1	0.875	0.3	1	0.2667	ENSSSCG00000017862	-0.11263	0.0455967	TRPV3	1.17129	0.556671	1.07321	0.000836848	two	3910190	0.653861	0.766491	-0.11263	0.0455967	-2.47014	0.709857	0.540547	0.0135062	0.201848	51529578	promoter-TSS (ENSSSCT00000019438)	-417	ENSSSCT00000019438	TRPV3	transient receptor potential cation channel subfamily V member 3
chr12	51529628	51529629	0.5	0.8182	0.8667	0.9091	1	0.6774	ENSSSCG00000017862	-0.113559	0.0879259	TRPV3	1.17129	0.556671	1.07321	0.000836848	two	3910191	0.673506	0.787065	-0.113559	0.0879259	-1.29153	0.0667525	0.076394	0.196521	0.753613	51529629	promoter-TSS (ENSSSCT00000019438)	-468	ENSSSCT00000019438	TRPV3	transient receptor potential cation channel subfamily V member 3
chr12	51529634	51529635	0.6364	1	0.8	0.871	1	0.931	ENSSSCG00000017862	-0.113559	0.0696831	TRPV3	1.17129	0.556671	1.07321	0.000836848	two	3910192	0.673506	0.787065	-0.113559	0.0696831	-1.62965	0.173601	0.148508	0.103176	0.592391	51529635	promoter-TSS (ENSSSCT00000019438)	-474	ENSSSCT00000019438	TRPV3	transient receptor potential cation channel subfamily V member 3
chr12	51529639	51529640	0.6667	0.6667	0.6667	0.8621	0.6	0.8077	ENSSSCG00000017862	-0.113559	0.0787904	TRPV3	1.17129	0.556671	1.07321	0.000836848	two	3910193	0.673506	0.787065	-0.113559	0.0787904	-1.44128	0.106785	0.0609766	0.149506	0.685898	51529640	promoter-TSS (ENSSSCT00000019438)	-479	ENSSSCT00000019438	TRPV3	transient receptor potential cation channel subfamily V member 3
chr12	51529729	51529730	0.9231	1	1	0.8333	1	1	ENSSSCG00000017862	-0.106043	0.020818	TRPV3	1.17129	0.556671	1.07321	0.000836848	two	3910194	0.706496	0.81254	-0.106043	0.020818	-5.09384	0.0746312	0.178802	3.51e-07	6.5e-05	51529730	promoter-TSS (ENSSSCT00000019438)	-569	ENSSSCT00000019438	TRPV3	transient receptor potential cation channel subfamily V member 3
chr12	51529736	51529737	0.9444	1	0.7333	0.8667	1	0.8	ENSSSCG00000017862	-0.106043	0.0220812	TRPV3	1.17129	0.556671	1.07321	0.000836848	two	3910195	0.706496	0.81254	-0.106043	0.0220812	-4.80242	0.0746312	0.0597472	1.57e-06	0.000223783	51529737	promoter-TSS (ENSSSCT00000019438)	-576	ENSSSCT00000019438	TRPV3	transient receptor potential cation channel subfamily V member 3
chr12	52547697	52547698	0.6842	0	0.7368	1	0.875	1	ENSSSCG00000017884	-0.113964	0.0492651	TEKT1	2.00746	0.662395	1.59961	2.74e-05	two	3923054	0.640311	0.754275	-0.113964	0.0492651	-2.31328	0.0746312	0.389589	0.0207071	0.260728	52547698	promoter-TSS (ENSSSCT00000019461)	-912	ENSSSCT00000019461	TEKT1
chr12	52547718	52547719	1	0	0.25	1	0.6842	1	ENSSSCG00000017884	-0.113964	0.0628531	TEKT1	2.00746	0.662395	1.59961	2.74e-05	two	3923056	0.640311	0.754275	-0.113964	0.0628531	-1.81318	0.0746312	0.105016	0.0698041	0.497687	52547719	promoter-TSS (ENSSSCT00000019461)	-933	ENSSSCT00000019461	TEKT1
chr1	252793257	252793258	0.7	0.75	1	0.8571	0.4	1	ENSSSCG00000028996	-0.201995	0.0865094	ALDH1A1	23.1574	12.9813	0.835041	4.89e-09	two	1393134	0.752165	0.95416	-0.201995	0.0865094	-2.33495	0.0746312	0.0788665	0.0195459	0.252056	252793258	promoter-TSS (ENSSSCT00000027607)	88	ENSSSCT00000027607	ALDH1A1
chr12	53271788	53271789	1	0.6	1	1	0.8	0.0667	ENSSSCG00000017894	-0.100252	0.0651281	WSCD1	24.6548	11.6305	1.08396	1.55e-31	two	3932083	0.266739	0.366991	-0.100252	0.0651281	-1.5393	0.0975528	0.115359	0.12373	0.638102	53271789	promoter-TSS (ENSSSCT00000019472)	-818	ENSSSCT00000019472	WSCD1
chr12	5822544	5822545	0.5714	0.8182	0.7	1	1	1	ENSSSCG00000017209	-0.179523	0.0719345	MIF4GD	17.2119	10.5835	0.701591	1.08e-10	two	3464757	0.42867	0.608193	-0.179523	0.0719345	-2.49564	0.544989	0.989475	0.0125729	0.193169	5822545	promoter-TSS (ENSSSCT00000018734)	-655	ENSSSCT00000018734	MIF4GD
chr12	5822592	5822593	0.92	1	1	0.8873	1	0	ENSSSCG00000017209	-0.179523	0.106145	MIF4GD	17.2119	10.5835	0.701591	1.08e-10	two	3464758	0.42867	0.608193	-0.179523	0.106145	-1.6913	0.194911	0.37407	0.09078	0.560803	5822593	promoter-TSS (ENSSSCT00000018734)	-703	ENSSSCT00000018734	MIF4GD
chr12	5822688	5822689	1	0.8333	0.9091	0.9118	0.9091	0.7273	ENSSSCG00000017209	-0.179523	0.113496	MIF4GD	17.2119	10.5835	0.701591	1.08e-10	two	3464760	0.42867	0.608193	-0.179523	0.113496	-1.58175	0.0594571	0.0881028	0.113707	0.616701	5822689	promoter-TSS (ENSSSCT00000018734)	-799	ENSSSCT00000018734	MIF4GD
chr12	5822712	5822713	0.8	0.8182	0.875	1	0.9091	0.6	ENSSSCG00000017209	-0.179523	0.119497	MIF4GD	17.2119	10.5835	0.701591	1.08e-10	two	3464762	0.42867	0.608193	-0.179523	0.119497	-1.50232	0.0662984	0.0513063	0.133013	0.656469	5822713	promoter-TSS (ENSSSCT00000018734)	-823	ENSSSCT00000018734	MIF4GD
chr12	63498784	63498785	0.75	0.8667	0.8667	0.9231	0.6	0.7778	ENSSSCG00000018058	-0.287116	0.0691072	ARHGAP23	43.3614	22.5378	0.944065	8.76e-53	two	4085401	0.450093	0.737209	-0.287116	0.0691072	-4.15465	0.0527236	0.0549039	3.26e-05	0.00258287	63498785	promoter-TSS (ENSSSCT00000019653)	79	ENSSSCT00000027800	ARHGAP23
chr12	63498790	63498791	0.8	0.9286	0.6667	1	0.6364	0.7647	ENSSSCG00000018058	-0.287116	0.0785795	ARHGAP23	43.3614	22.5378	0.944065	8.76e-53	two	4085402	0.450093	0.737209	-0.287116	0.0785795	-3.65383	0.065648	0.0468643	0.000258355	0.0127958	63498791	promoter-TSS (ENSSSCT00000019653)	73	ENSSSCT00000027800	ARHGAP23
chr12	63498812	63498813	0.7778	0.875	0.8667	0.9545	0.8	1	ENSSSCG00000018058	-0.233195	0.0507138	ARHGAP23	43.3614	22.5378	0.944065	8.76e-53	two	4085403	0.465862	0.699057	-0.233195	0.0507138	-4.59825	0.107123	0.28272	4.26e-06	0.000505908	63498813	promoter-TSS (ENSSSCT00000019653)	51	ENSSSCT00000027800	ARHGAP23
chr12	63498853	63498854	0.625	1	0.8571	0.7917	0.8	0.7273	ENSSSCG00000018058	-0.184097	0.0453489	ARHGAP23	43.3614	22.5378	0.944065	8.76e-53	two	4085404	0.490834	0.674931	-0.184097	0.0453489	-4.05956	0.0746312	0.0568068	4.92e-05	0.00357032	63498854	promoter-TSS (ENSSSCT00000019653)	10	ENSSSCT00000027800	ARHGAP23
chr1	265174691	265174692	1	0.7	0.8182	0.5122	0.65	0.1538	ENSSSCG00000005344	-0.12385	0.141254	MELK	1.90698	0.421041	2.17926	5.65e-14	two	1449478	0.410635	0.534485	-0.12385	0.141254	-0.876791	0.058322	0.122376	0.3806	0.896237	265174692	promoter-TSS (ENSSSCT00000005883)	-332	ENSSSCT00000005883	MELK
chr1	284589090	284589091	0.8947	0.75	1	0.6364	0.8	0.2	ENSSSCG00000023714	-0.163063	0.057633	SLC31A2	1.53828	0.804154	0.935773	0.000128458	two	1569477	0.204067	0.36713	-0.163063	0.057633	-2.82933	0.0746312	0.056496	0.00466454	0.101865	284589091	promoter-TSS (ENSSSCT00000029639)	-229	ENSSSCT00000029639	SLC31A2
chr1	284589134	284589135	1	1	1	0.5357	0.6667	0.8235	ENSSSCG00000023714	-0.171123	0.0713237	SLC31A2	1.53828	0.804154	0.935773	0.000128458	two	1569479	0.19836	0.369483	-0.171123	0.0713237	-2.39924	0.223561	0.290946	0.0164291	0.227297	284589135	promoter-TSS (ENSSSCT00000029639)	-185	ENSSSCT00000029639	SLC31A2
chr1	284589138	284589139	0	0.5833	0.8333	0.7273	1	0.3529	ENSSSCG00000023714	-0.179466	0.094061	SLC31A2	1.53828	0.804154	0.935773	0.000128458	two	1569481	0.192343	0.371809	-0.179466	0.094061	-1.90797	0.142289	0.0798563	0.0563945	0.448797	284589139	promoter-TSS (ENSSSCT00000029639)	-181	ENSSSCT00000029639	SLC31A2
chr1	284589145	284589146	0.8286	0.6667	0.9286	1	0.7895	0.7	ENSSSCG00000023714	-0.187305	0.0856253	SLC31A2	1.53828	0.804154	0.935773	0.000128458	two	1569483	0.186803	0.374108	-0.187305	0.0856253	-2.1875	0.243211	0.143189	0.0287063	0.31419	284589146	promoter-TSS (ENSSSCT00000029639)	-174	ENSSSCT00000029639	SLC31A2
chr1	284589235	284589236	1	0.6923	1	0.6667	0.5833	0	ENSSSCG00000023714	-0.229016	0.0500889	SLC31A2	1.53828	0.804154	0.935773	0.000128458	two	1569485	0.111394	0.34041	-0.229016	0.0500889	-4.57219	0.249262	0.856399	4.83e-06	0.000559648	284589236	promoter-TSS (ENSSSCT00000029639)	-84	ENSSSCT00000029639	SLC31A2
chr1	284589240	284589241	0.8511	1	0.775	1	0.8333	0	ENSSSCG00000023714	-0.229016	0.0503005	SLC31A2	1.53828	0.804154	0.935773	0.000128458	two	1569486	0.111394	0.34041	-0.229016	0.0503005	-4.55295	0.245976	0.845027	5.29e-06	0.00060223	284589241	promoter-TSS (ENSSSCT00000029639)	-79	ENSSSCT00000029639	SLC31A2
chr1	284589257	284589258	0.5952	1	0.85	0.8462	0.875	0	ENSSSCG00000023714	-0.202476	0.0462456	SLC31A2	1.53828	0.804154	0.935773	0.000128458	two	1569487	0.105613	0.308089	-0.202476	0.0462456	-4.37828	0.226089	0.771869	1.2e-05	0.00116212	284589258	promoter-TSS (ENSSSCT00000029639)	-62	ENSSSCT00000029639	SLC31A2
chr1	284589260	284589261	0.881	0.8182	0.7273	0.8182	0.92	0	ENSSSCG00000023714	-0.202476	0.0467936	SLC31A2	1.53828	0.804154	0.935773	0.000128458	two	1569488	0.105613	0.308089	-0.202476	0.0467936	-4.327	0.226089	0.738728	1.51e-05	0.00140136	284589261	promoter-TSS (ENSSSCT00000029639)	-59	ENSSSCT00000029639	SLC31A2
chr1	284589269	284589270	0.55	0.8333	1	0.7	1	0	ENSSSCG00000023714	-0.1817	0.043142	SLC31A2	1.53828	0.804154	0.935773	0.000128458	two	1569489	0.102071	0.283771	-0.1817	0.043142	-4.21167	0.202	0.701096	2.53e-05	0.00211811	284589270	promoter-TSS (ENSSSCT00000029639)	-50	ENSSSCT00000029639	SLC31A2
chr1	284589287	284589288	0.8667	1	1	1	0.6111	0	ENSSSCG00000023714	-0.171551	0.0437296	SLC31A2	1.53828	0.804154	0.935773	0.000128458	two	1569490	0.10054	0.272091	-0.171551	0.0437296	-3.92299	0.0757441	0.678349	8.75e-05	0.00558837	284589288	promoter-TSS (ENSSSCT00000029639)	-32	ENSSSCT00000029639	SLC31A2
chr1	284589303	284589304	1	0.8182	1	0.8333	0.4667	0	ENSSSCG00000023714	-0.153395	0.0388147	SLC31A2	1.53828	0.804154	0.935773	0.000128458	two	1569491	0.100249	0.253644	-0.153395	0.0388147	-3.95199	0.124304	0.616116	7.75e-05	0.00508921	284589304	promoter-TSS (ENSSSCT00000029639)	-16	ENSSSCT00000029639	SLC31A2
chr1	307085381	307085382	1	1	0.3793	0.7727	0.5	0.9	ENSSSCG00000022891	-0.128883	0.0502186	TMEM8C	0.557366	0.068219	3.03038	0.0412373	two	1782329	0.704523	0.833406	-0.128883	0.0502186	-2.56643	0.432129	0.0617033	0.010275	0.170295	307085382	promoter-TSS (ENSSSCT00000030986)	81	ENSSSCT00000030986	TMEM8C
chr1	307085391	307085392	1	1	0.4545	0.8182	0.7273	1	ENSSSCG00000022891	-0.128883	0.0495187	TMEM8C	0.557366	0.068219	3.03038	0.0412373	two	1782330	0.704523	0.833406	-0.128883	0.0495187	-2.60271	0.44441	0.115307	0.00924908	0.159317	307085392	promoter-TSS (ENSSSCT00000030986)	71	ENSSSCT00000030986	TMEM8C
chr1	307085401	307085402	0.92	0.8462	0.7667	1	1	0.6364	ENSSSCG00000022891	-0.128883	0.0646665	TMEM8C	0.557366	0.068219	3.03038	0.0412373	two	1782331	0.704523	0.833406	-0.128883	0.0646665	-1.99304	0.0555888	0.0743726	0.0462574	0.406088	307085402	promoter-TSS (ENSSSCT00000030986)	61	ENSSSCT00000030986	TMEM8C
chr1	307085428	307085429	0.9048	0.7647	0.7273	0.9583	0.8333	0.8125	ENSSSCG00000022891	-0.128883	0.0701933	TMEM8C	0.557366	0.068219	3.03038	0.0412373	two	1782332	0.704523	0.833406	-0.128883	0.0701933	-1.83611	0.0659806	0.0544591	0.066341	0.485795	307085429	promoter-TSS (ENSSSCT00000030986)	34	ENSSSCT00000030986	TMEM8C
chr1	307085454	307085455	0.7273	0.7778	0.2581	0.8333	0.75	1	ENSSSCG00000022891	-0.128883	0.0665255	TMEM8C	0.557366	0.068219	3.03038	0.0412373	two	1782333	0.704523	0.833406	-0.128883	0.0665255	-1.93734	0.153354	0.138286	0.0527033	0.433935	307085455	promoter-TSS (ENSSSCT00000030986)	8	ENSSSCT00000030986	TMEM8C
chr1	307085468	307085469	0.2	0.7391	0.6316	0.8824	0.6923	0.9333	ENSSSCG00000022891	-0.128883	0.0692139	TMEM8C	0.557366	0.068219	3.03038	0.0412373	two	1782334	0.704523	0.833406	-0.128883	0.0692139	-1.86209	0.0778049	0.067419	0.0625899	0.472362	307085469	promoter-TSS (ENSSSCT00000030986)	-6	ENSSSCT00000030986	TMEM8C
chr1	307085487	307085488	0.8333	0.8182	0.7857	0.875	0.4	1	ENSSSCG00000022891	-0.128883	0.0786465	TMEM8C	0.557366	0.068219	3.03038	0.0412373	two	1782335	0.704523	0.833406	-0.128883	0.0786465	-1.63876	0.0504711	0.0856988	0.101263	0.587772	307085488	promoter-TSS (ENSSSCT00000030986)	-25	ENSSSCT00000030986	TMEM8C
chr1	307085496	307085497	0.9091	0.84	0.8125	0.8182	0.2	0.8571	ENSSSCG00000022891	-0.128883	0.0766474	TMEM8C	0.557366	0.068219	3.03038	0.0412373	two	1782336	0.704523	0.833406	-0.128883	0.0766474	-1.6815	0.104079	0.0532853	0.0926652	0.56585	307085497	promoter-TSS (ENSSSCT00000030986)	-34	ENSSSCT00000030986	TMEM8C
chr1	307085533	307085534	1	0.8462	0.8	0.3	0.4545	0.8182	ENSSSCG00000022891	-0.128883	0.0653228	TMEM8C	0.557366	0.068219	3.03038	0.0412373	two	1782337	0.704523	0.833406	-0.128883	0.0653228	-1.97301	0.0931867	0.0595411	0.0484941	0.416043	307085534	promoter-TSS (ENSSSCT00000030986)	-71	ENSSSCT00000030986	TMEM8C
chr1	307085545	307085546	1	0.7273	0.5833	0.8571	0.6	0.9	ENSSSCG00000022891	-0.128883	0.054116	TMEM8C	0.557366	0.068219	3.03038	0.0412373	two	1782338	0.704523	0.833406	-0.128883	0.054116	-2.3816	0.0582094	0.0617033	0.0172375	0.23391	307085546	promoter-TSS (ENSSSCT00000030986)	-83	ENSSSCT00000030986	TMEM8C
chr13	101031345	101031346	0.95	0.5	0.2727	0.8	1	0.1818	ENSSSCG00000011721	-0.126099	0.0843534	P2RY1	7.03326	4.88714	0.525205	5.87e-05	two	4629224	0.195308	0.321407	-0.126099	0.0843534	-1.49489	0.106982	0.0910603	0.134944	0.660096	101031346	promoter-TSS (ENSSSCT00000012831)	-766	ENSSSCT00000012831	P2RY1	purinergic receptor P2Y, G protein-coupled, 1
chr13	117956079	117956080	0.8	1	1	0	0.5714	1	ENSSSCG00000011747	-0.107405	0.0508795	CLDN11	573.474	150.126	1.93355	0	two	4709035	0.611828	0.719233	-0.107405	0.0508795	-2.11097	0.286531	0.932095	0.034775	0.349197	117956080	promoter-TSS (ENSSSCT00000012858)	-496	ENSSSCT00000012858	CLDN11	claudin
chr13	117956080	117956081	0.8649	1	1	1	0.92	1	ENSSSCG00000011747	-0.107405	0.0549148	CLDN11	573.474	150.126	1.93355	0	two	4709036	0.611828	0.719233	-0.107405	0.0549148	-1.95585	0.171758	0.243844	0.0504829	0.424643	117956081	promoter-TSS (ENSSSCT00000012858)	-495	ENSSSCT00000012858	CLDN11	claudin
chr13	149301186	149301187	0.9	0.9524	0.7419	0.1538	0.8667	0.5455	ENSSSCG00000011888	-0.172654	0.162218	GPR156	1.34863	0.614068	1.13503	1.6e-06	two	4904031	0.431728	0.604382	-0.172654	0.162218	-1.06433	0.117781	0.0470153	0.287178	0.841055	149301187	promoter-TSS (ENSSSCT00000013005)	-614	ENSSSCT00000013005	GPR156	gamma-aminobutyric acid type B receptor-like
chr13	149301356	149301357	1	0.9643	1	0.8	1	0.5	ENSSSCG00000011888	-0.160068	0.10105	GPR156	1.34863	0.614068	1.13503	1.6e-06	two	4904034	0.396796	0.556863	-0.160068	0.10105	-1.58404	0.108732	0.275695	0.113185	0.615532	149301357	promoter-TSS (ENSSSCT00000013005)	-444	ENSSSCT00000013005	GPR156	gamma-aminobutyric acid type B receptor-like
chr13	206118812	206118813	1	0.5238	0	1	0.8462	0.8	ENSSSCG00000021598	-0.191189	0.0623354	EVA1C	15.3997	6.27254	1.29578	6.79e-23	two	5132360	0.714212	0.9054	-0.191189	0.0623354	-3.06709	0.0746312	0.0623188	0.00216152	0.060122	206118813	promoter-TSS (ENSSSCT00000027220)	-997	ENSSSCT00000027220	EVA1C
chr13	2580877	2580878	0.1765	0	1	1	0.8	1	ENSSSCG00000026622	-0.17063	0.134692	EAF1	39.0778	25.6941	0.604912	7.26e-22	two	4103501	0.450462	0.621091	-0.17063	0.134692	-1.26682	0.0840238	0.165071	0.205221	0.764179	2580878	promoter-TSS (ENSSSCT00000029109)	-939	ENSSSCT00000029109	EAF1
chr13	2580879	2580880	0.2	0	1	0.4	1	1	ENSSSCG00000026622	-0.17063	0.0859828	EAF1	39.0778	25.6941	0.604912	7.26e-22	two	4103502	0.450462	0.621091	-0.17063	0.0859828	-1.98446	0.0746312	0.262805	0.0472042	0.410329	2580880	promoter-TSS (ENSSSCT00000029109)	-937	ENSSSCT00000029109	EAF1
chr13	2580888	2580889	0.2105	0.0128	0.8182	0	1	0.5	ENSSSCG00000026622	-0.17063	0.122782	EAF1	39.0778	25.6941	0.604912	7.26e-22	two	4103503	0.450462	0.621091	-0.17063	0.122782	-1.3897	0.0619297	0.0742741	0.164621	0.709994	2580889	promoter-TSS (ENSSSCT00000029109)	-928	ENSSSCT00000029109	EAF1
chr13	2580933	2580934	0.2632	0	1	0.7	0.8	1	ENSSSCG00000026622	-0.17063	0.0988677	EAF1	39.0778	25.6941	0.604912	7.26e-22	two	4103505	0.450462	0.621091	-0.17063	0.0988677	-1.72584	0.0677406	0.221841	0.0843766	0.542934	2580934	promoter-TSS (ENSSSCT00000029109)	-883	ENSSSCT00000029109	EAF1
chr13	32838024	32838025	1	0.6923	0.8667	0.4375	1	0.7949	ENSSSCG00000023664	-0.115922	0.0552029	ALS2CL	2.89687	1.39392	1.05534	0.00952999	two	4264289	0.706348	0.82227	-0.115922	0.0552029	-2.09992	0.0445142	0.033857	0.0357358	0.35442	32838025	promoter-TSS (ENSSSCT00000030929)	-679	ENSSSCT00000030929
chr13	32838031	32838032	0.6154	0.7857	1	0.4667	1	0.9459	ENSSSCG00000023664	-0.115922	0.0530107	ALS2CL	2.89687	1.39392	1.05534	0.00952999	two	4264290	0.706348	0.82227	-0.115922	0.0530107	-2.18676	0.0367227	0.0532449	0.0287602	0.314528	32838032	promoter-TSS (ENSSSCT00000030929)	-686	ENSSSCT00000030929
chr13	34564221	34564222	1	1	0.9333	0.3889	0	0.1111	ENSSSCG00000011358	-0.102479	0.0506123	TREX1	3.59428	2.53878	0.501566	0.0290457	two	4277592	0.405547	0.508027	-0.102479	0.0506123	-2.02479	0.989475	0.350016	0.0428887	0.390501	34564222	promoter-TSS (ENSSSCT00000012435)	-888	ENSSSCT00000012435	TREX1
chr13	35920832	35920833	1	0.8182	0.9286	0.5455	0.8696	0.45	ENSSSCG00000011400	-0.104035	0.0718002	SEMA3B	2.71114	1.08648	1.31924	6.17e-08	two	4293261	0.474547	0.578581	-0.104035	0.0718002	-1.44895	0.0469427	0.0621024	0.147352	0.682222	35920833	promoter-TSS (ENSSSCT00000012478)	-324	ENSSSCT00000012478	SEMA3B	semaphorin 3
chr13	35920852	35920853	1	1	1	0	0.8182	0.3333	ENSSSCG00000011400	-0.104199	0.0678344	SEMA3B	2.71114	1.08648	1.31924	6.17e-08	two	4293262	0.481951	0.58615	-0.104199	0.0678344	-1.53608	0.132144	0.0670158	0.124519	0.639718	35920853	promoter-TSS (ENSSSCT00000012478)	-304	ENSSSCT00000012478	SEMA3B	semaphorin 3
chr13	35920862	35920863	0.8182	0.8182	0.9091	0.8	0.84	0.2353	ENSSSCG00000011400	-0.104199	0.0713862	SEMA3B	2.71114	1.08648	1.31924	6.17e-08	two	4293263	0.481951	0.58615	-0.104199	0.0713862	-1.45965	0.0793985	0.0948052	0.144385	0.677089	35920863	promoter-TSS (ENSSSCT00000012478)	-294	ENSSSCT00000012478	SEMA3B	semaphorin 3
chr13	35920922	35920923	0.2	0.8235	1	0	0.8889	0.4	ENSSSCG00000011400	-0.1021	0.0751547	SEMA3B	2.71114	1.08648	1.31924	6.17e-08	two	4293266	0.455068	0.557168	-0.1021	0.0751547	-1.35853	0.0812746	0.0553021	0.174296	0.724079	35920923	promoter-TSS (ENSSSCT00000012478)	-234	ENSSSCT00000012478	SEMA3B	semaphorin 3
chr13	37219050	37219051	1	1	0	0.8194	1	0	ENSSSCG00000027192	-0.109802	0.177451	IQCF3	0.884923	0.0983417	3.16968	0.0214887	two	4303173	0.179035	0.288837	-0.109802	0.177451	-0.618775	0.098764	0.140736	0.536065	0.948888	37219051	promoter-TSS (ENSSSCT00000025976)	-57	ENSSSCT00000025976	IQCF3
chr13	37219065	37219066	1	1	0.1667	0.5392	1	0.3636	ENSSSCG00000027192	-0.109802	0.113537	IQCF3	0.884923	0.0983417	3.16968	0.0214887	two	4303174	0.179035	0.288837	-0.109802	0.113537	-0.967101	0.0746312	0.0613368	0.333493	0.871454	37219066	promoter-TSS (ENSSSCT00000025976)	-42	ENSSSCT00000025976	IQCF3
chr1	3715772	3715773	0.9032	0.2955	1	0.8462	1	0.5	ENSSSCG00000004020	-0.184104	0.111014	SFT2D1	22.6775	14.1806	0.677343	5.48e-14	two	51552	0.192531	0.376635	-0.184104	0.111014	-1.65838	0.0419848	0.0489279	0.0972407	0.577715	3715773	promoter-TSS (ENSSSCT00000004445)	-628	ENSSSCT00000004445	SFT2D1
chr1	3715831	3715832	0.85	0.9592	0.8333	0.6667	0.7273	0.0769	ENSSSCG00000004020	-0.210793	0.0932067	SFT2D1	22.6775	14.1806	0.677343	5.48e-14	two	51553	0.156196	0.366988	-0.210793	0.0932067	-2.26156	0.0927877	0.0975632	0.0237246	0.28211	3715832	promoter-TSS (ENSSSCT00000004445)	-569	ENSSSCT00000004445	SFT2D1
chr1	3715875	3715876	1	0.8444	1	0.6923	1	0	ENSSSCG00000004020	-0.192952	0.0508778	SFT2D1	22.6775	14.1806	0.677343	5.48e-14	two	51554	0.136379	0.329331	-0.192952	0.0508778	-3.79247	0.0981621	0.234619	0.000149158	0.0084238	3715876	promoter-TSS (ENSSSCT00000004445)	-525	ENSSSCT00000004445	SFT2D1
chr1	3715877	3715878	0.913	0.6	1	1	0.9167	0	ENSSSCG00000004020	-0.192952	0.0518599	SFT2D1	22.6775	14.1806	0.677343	5.48e-14	two	51555	0.136379	0.329331	-0.192952	0.0518599	-3.72065	0.0535683	0.234619	0.000198712	0.0104867	3715878	promoter-TSS (ENSSSCT00000004445)	-523	ENSSSCT00000004445	SFT2D1
chr1	3715978	3715979	0	0.95	0.4	0.875	0.875	0.1667	ENSSSCG00000004020	-0.134145	0.0670394	SFT2D1	22.6775	14.1806	0.677343	5.48e-14	two	51566	0.107945	0.24209	-0.134145	0.0670394	-2.00099	0.123796	0.0803111	0.0453931	0.40215	3715979	promoter-TSS (ENSSSCT00000004445)	-422	ENSSSCT00000004445	SFT2D1
chr1	3716018	3716019	0	0.8421	1	1	0	0	ENSSSCG00000004020	-0.114042	0.0413231	SFT2D1	22.6775	14.1806	0.677343	5.48e-14	two	51567	0.105256	0.219298	-0.114042	0.0413231	-2.75976	0.144728	0.107649	0.00578439	0.117541	3716019	promoter-TSS (ENSSSCT00000004445)	-382	ENSSSCT00000004445	SFT2D1
chr13	77996678	77996679	1	0.9167	0.6	1	0.375	1	ENSSSCG00000011606	-0.180131	0.068335	WNT7A	4.075	1.40331	1.53796	4.66e-10	two	4492296	0.317123	0.497253	-0.180131	0.068335	-2.63599	0.240024	0.326985	0.00838917	0.14968	77996679	promoter-TSS (ENSSSCT00000012703)	-851	ENSSSCT00000012703	WNT7A
chr13	77996696	77996697	0.1765	0.931	0.7857	0.8125	0.4	1	ENSSSCG00000011606	-0.180131	0.0797676	WNT7A	4.075	1.40331	1.53796	4.66e-10	two	4492297	0.317123	0.497253	-0.180131	0.0797676	-2.25819	0.197934	0.279513	0.0239338	0.283534	77996697	promoter-TSS (ENSSSCT00000012703)	-833	ENSSSCT00000012703	WNT7A
chr13	77996717	77996718	0.7	0.9394	0.9231	0.4615	0.5385	0.2857	ENSSSCG00000011606	-0.176277	0.0946668	WNT7A	4.075	1.40331	1.53796	4.66e-10	two	4492298	0.284526	0.460803	-0.176277	0.0946668	-1.86208	0.0675579	0.208844	0.0625918	0.472369	77996718	promoter-TSS (ENSSSCT00000012703)	-812	ENSSSCT00000012703	WNT7A
chr13	77996754	77996755	0.4	0.8235	0.8333	0.8852	0.2727	0.2059	ENSSSCG00000011606	-0.125205	0.101519	WNT7A	4.075	1.40331	1.53796	4.66e-10	two	4492299	0.275576	0.400782	-0.125205	0.101519	-1.23332	0.107561	0.0952381	0.217458	0.778145	77996755	promoter-TSS (ENSSSCT00000012703)	-775	ENSSSCT00000012703	WNT7A
chr13	80169008	80169009	0	0.3529	0.875	1	0.4	0.2727	ENSSSCG00000011624	-0.16096	0.0571209	MCM2	1.34334	0.847915	0.663829	0.00561378	two	4510696	0.335816	0.496776	-0.16096	0.0571209	-2.81788	0.443746	0.415254	0.00483416	0.104335	80169009	promoter-TSS (ENSSSCT00000012721)	-415	ENSSSCT00000012721	MCM2	DNA replication licensing factor MCM2
chr13	80169034	80169035	0.1765	0.4545	1	1	0.8333	0.75	ENSSSCG00000011624	-0.113254	0.0790555	MCM2	1.34334	0.847915	0.663829	0.00561378	two	4510697	0.461684	0.574938	-0.113254	0.0790555	-1.43259	0.475036	0.132293	0.151975	0.689987	80169035	promoter-TSS (ENSSSCT00000012721)	-441	ENSSSCT00000012721	MCM2	DNA replication licensing factor MCM2
chr14	120937305	120937306	1	0.7222	0.65	1	1	1	ENSSSCG00000010552	-0.143368	0.0374553	PKD2L1	0.219766	0	Inf	0.000515743	two	6171904	0.771026	0.914393	-0.143368	0.0374553	-3.8277	0.0746312	0.0882872	0.000129344	0.00755286	120937306	promoter-TSS (ENSSSCT00000011544)	25	ENSSSCT00000011544	PKD2L1	polycystin 2L1
chr14	120937310	120937311	1	0.9091	0.8462	0.9189	0.7857	1	ENSSSCG00000010552	-0.143368	0.0374553	PKD2L1	0.219766	0	Inf	0.000515743	two	6171905	0.771026	0.914393	-0.143368	0.0374553	-3.8277	0.0746312	0.0882872	0.000129344	0.00755286	120937311	promoter-TSS (ENSSSCT00000011544)	20	ENSSSCT00000011544	PKD2L1	polycystin 2L1
chr14	120963331	120963332	0.4545	0.6667	0.8	0.75	0.8947	1	ENSSSCG00000010554	-0.568876	0.157086	SCD	236.89	157.024	0.593237	1.1e-38	two	6172070	0.313923	0.882798	-0.568876	0.157086	-3.62144	0.0891088	0.0695846	0.000292973	0.0140672	120963332	promoter-TSS (ENSSSCT00000011546)	-874	ENSSSCT00000011546	SCD	stearoyl-CoA desaturase (delta-9 desaturase)
chr14	1209959	1209960	1	0.7778	0.8636	1	1	0.8333	ENSSSCG00000009584	-0.29353	0.112363	SEMA4D	18.215	7.5761	1.2656	2.03e-91	two	5314307	0.438579	0.732109	-0.29353	0.112363	-2.61235	0.068256	0.0518906	0.00899231	0.156493	1209960	promoter-TSS (ENSSSCT00000010505)	-473	ENSSSCT00000033039	SEMA4D	semaphorin 4
chr14	1209979	1209980	1	0.9048	0.5	0.8636	1	0.6667	ENSSSCG00000009584	-0.29353	0.0914302	SEMA4D	18.215	7.5761	1.2656	2.03e-91	two	5314308	0.438579	0.732109	-0.29353	0.0914302	-3.21043	0.0690828	0.0536922	0.00132535	0.0425485	1209980	promoter-TSS (ENSSSCT00000010505)	-493	ENSSSCT00000033039	SEMA4D	semaphorin 4
chr14	1209983	1209984	1	0.9091	0.9231	0.8462	1	1	ENSSSCG00000009584	-0.29353	0.0848168	SEMA4D	18.215	7.5761	1.2656	2.03e-91	two	5314309	0.438579	0.732109	-0.29353	0.0848168	-3.46076	0.0603802	0.153862	0.000538653	0.022126	1209984	promoter-TSS (ENSSSCT00000010505)	-497	ENSSSCT00000033039	SEMA4D	semaphorin 4
chr14	1210011	1210012	0.9796	0.8947	0.8421	1	1	0.9231	ENSSSCG00000009584	-0.29353	0.0596743	SEMA4D	18.215	7.5761	1.2656	2.03e-91	two	5314310	0.438579	0.732109	-0.29353	0.0596743	-4.91887	0.0746312	0.125072	8.7e-07	0.000137936	1210012	promoter-TSS (ENSSSCT00000010505)	-525	ENSSSCT00000033039	SEMA4D	semaphorin 4
chr14	121708244	121708245	0.9375	0.75	0.7647	0.8	0.4167	0.3	ENSSSCG00000022429	-0.170114	0.0534969	KAZALD1	0.307688	0.157401	0.967022	0.0471313	two	6178062	0.257482	0.427596	-0.170114	0.0534969	-3.17988	0.15932	0.0611053	0.00147334	0.0458721	121708245	promoter-TSS (ENSSSCT00000027055)	99	ENSSSCT00000027055	KAZALD1
chr14	1219495	1219496	0.88	0	1	0.8571	0.92	0.5	ENSSSCG00000009584	-0.131885	0.0578477	SEMA4D	18.215	7.5761	1.2656	2.03e-91	two	5314474	0.514171	0.646056	-0.131885	0.0578477	-2.27986	0.0746312	0.0691262	0.0226158	0.274454	1219496	promoter-TSS (ENSSSCT00000033105)	80	ENSSSCT00000033344	SEMA4D	semaphorin 4
chr14	1219541	1219542	0.96	0	0.8	1	1	0.8182	ENSSSCG00000009584	-0.10614	0.103928	SEMA4D	18.215	7.5761	1.2656	2.03e-91	two	5314477	0.538991	0.64513	-0.10614	0.103928	-1.02128	0.244306	0.0745487	0.30712	0.855018	1219542	promoter-TSS (ENSSSCT00000033105)	34	ENSSSCT00000033344	SEMA4D	semaphorin 4
chr14	1219589	1219590	0.9545	0	0.7857	0	0.6154	0.5833	ENSSSCG00000009584	-0.108787	0.0987959	SEMA4D	18.215	7.5761	1.2656	2.03e-91	two	5314479	0.512499	0.621286	-0.108787	0.0987959	-1.10113	0.0879319	0.0542592	0.270841	0.828407	1219590	promoter-TSS (ENSSSCT00000033105)	-13	ENSSSCT00000033105	SEMA4D	semaphorin 4
chr14	1220400	1220401	1	0.8462	1	0.7143	0	0.8182	ENSSSCG00000009584	-0.114295	0.0350452	SEMA4D	18.215	7.5761	1.2656	2.03e-91	two	5314495	0.781441	0.895736	-0.114295	0.0350452	-3.26135	0.0746312	0.0576015	0.00110884	0.0374543	1220401	promoter-TSS (ENSSSCT00000033105)	-824	ENSSSCT00000033105	SEMA4D	semaphorin 4
chr14	1220405	1220406	1	0.9667	1	0.4545	0.3333	0.9	ENSSSCG00000009584	-0.114295	0.0340529	SEMA4D	18.215	7.5761	1.2656	2.03e-91	two	5314496	0.781441	0.895736	-0.114295	0.0340529	-3.35638	0.0746312	0.0568844	0.000789696	0.0292956	1220406	promoter-TSS (ENSSSCT00000033105)	-829	ENSSSCT00000033105	SEMA4D	semaphorin 4
chr14	1220480	1220481	1	1	0.9286	0.8182	0	1	ENSSSCG00000009584	-0.114204	0.0973986	SEMA4D	18.215	7.5761	1.2656	2.03e-91	two	5314497	0.721535	0.835739	-0.114204	0.0973986	-1.17254	0.122472	0.0999565	0.240981	0.802166	1220481	promoter-TSS (ENSSSCT00000033105)	-904	ENSSSCT00000033105	SEMA4D	semaphorin 4
chr14	1220488	1220489	1	0.9444	1	0.7222	0.4444	0.7727	ENSSSCG00000009584	-0.114204	0.105995	SEMA4D	18.215	7.5761	1.2656	2.03e-91	two	5314498	0.721535	0.835739	-0.114204	0.105995	-1.07745	0.074088	0.0720668	0.281281	0.83658	1220489	promoter-TSS (ENSSSCT00000033105)	-912	ENSSSCT00000033105	SEMA4D	semaphorin 4
chr14	125141568	125141569	0.9032	0.9	0.4	1	1	0.9091	ENSSSCG00000010609	-0.135459	0.0490226	CFAP43	1.12861	0.671708	0.748642	0.000168601	two	6203794	0.73496	0.870419	-0.135459	0.0490226	-2.76319	0.0746312	0.0596887	0.00572392	0.116738	125141569	promoter-TSS (ENSSSCT00000023381)	44	ENSSSCT00000023381	CFAP43
chr14	125141571	125141572	0.9412	0.9091	1	0.9286	0.4545	0.8	ENSSSCG00000010609	-0.135459	0.0476472	CFAP43	1.12861	0.671708	0.748642	0.000168601	two	6203796	0.73496	0.870419	-0.135459	0.0476472	-2.84296	0.0746312	0.0576799	0.00446972	0.0989973	125141572	promoter-TSS (ENSSSCT00000023381)	41	ENSSSCT00000023381	CFAP43
chr14	125141715	125141716	0	0.6154	1	1	0.7	0.9231	ENSSSCG00000010609	-0.135459	0.0515611	CFAP43	1.12861	0.671708	0.748642	0.000168601	two	6203797	0.73496	0.870419	-0.135459	0.0515611	-2.62715	0.0746312	0.0608288	0.00861033	0.15221	125141716	promoter-TSS (ENSSSCT00000023381)	-103	ENSSSCT00000023381	CFAP43
chr14	125141716	125141717	0.8857	0.96	1	0.7143	0.1818	0.8	ENSSSCG00000010609	-0.135459	0.120458	CFAP43	1.12861	0.671708	0.748642	0.000168601	two	6203798	0.73496	0.870419	-0.135459	0.120458	-1.12453	0.13403	0.0459804	0.260788	0.820009	125141717	promoter-TSS (ENSSSCT00000023381)	-104	ENSSSCT00000023381	CFAP43
chr14	138475222	138475223	0.7778	0.7143	0.9615	0.9091	0.8182	0.8	ENSSSCG00000010665	-0.171905	0.0917388	SHTN1	76.7345	52.8632	0.537612	4.05e-16	two	6291328	0.72171	0.893615	-0.171905	0.0917388	-1.87386	0.0746312	0.0599538	0.0609502	0.466332	138475223	promoter-TSS (ENSSSCT00000011666)	-333	ENSSSCT00000011666	KIAA1598
chr14	142566234	142566235	0.931	0.8333	0.8636	0.3226	0.7143	0.6154	ENSSSCG00000010698	-0.110439	0.0892036	FGFR2	26.5962	18.3869	0.532536	1.07e-14	two	6335640	0.33455	0.444989	-0.110439	0.0892036	-1.23806	0.0589807	0.0724651	0.215694	0.776191	142566235	promoter-TSS (ENSSSCT00000033856)	-213	ENSSSCT00000033651	FGFR2
chr14	142566247	142566248	0.9412	0.92	0.5714	0.3731	1	0.5333	ENSSSCG00000010698	-0.110439	0.098799	FGFR2	26.5962	18.3869	0.532536	1.07e-14	two	6335641	0.33455	0.444989	-0.110439	0.098799	-1.11782	0.0653778	0.0612371	0.263645	0.82245	142566248	promoter-TSS (ENSSSCT00000033856)	-226	ENSSSCT00000033651	FGFR2
chr14	142566288	142566289	1	0.6111	0.1818	0.942	0.7692	0.5385	ENSSSCG00000010698	-0.106061	0.109825	FGFR2	26.5962	18.3869	0.532536	1.07e-14	two	6335642	0.354641	0.460702	-0.106061	0.109825	-0.96573	0.0700944	0.0901458	0.334179	0.871865	142566289	promoter-TSS (ENSSSCT00000033856)	-267	ENSSSCT00000033651	FGFR2
chr14	148218863	148218864	1	0.8214	0.9167	0.7273	0.2667	0.7692	ENSSSCG00000010749	-0.165411	0.041244	FAM196A	7.5238	2.7485	1.45282	1.47e-29	two	6414585	0.626133	0.791544	-0.165411	0.041244	-4.01055	0.0746312	0.0898001	6.06e-05	0.00420172	148218864	promoter-TSS (ENSSSCT00000027143)	-655	ENSSSCT00000027143	FAM196A
chr14	148218865	148218866	0.875	0.7179	0.45	1	0.875	0.8462	ENSSSCG00000010749	-0.154927	0.0419502	FAM196A	7.5238	2.7485	1.45282	1.47e-29	two	6414586	0.627973	0.7829	-0.154927	0.0419502	-3.69312	0.0746312	0.101508	0.000221519	0.011386	148218866	promoter-TSS (ENSSSCT00000027143)	-653	ENSSSCT00000027143	FAM196A
chr14	148218906	148218907	1	0.6053	0.9231	0.1667	0.2353	0.6667	ENSSSCG00000010749	-0.172303	0.0917358	FAM196A	7.5238	2.7485	1.45282	1.47e-29	two	6414587	0.61053	0.782833	-0.172303	0.0917358	-1.87825	0.0952689	0.0500184	0.0603466	0.464037	148218907	promoter-TSS (ENSSSCT00000027143)	-612	ENSSSCT00000027143	FAM196A
chr14	148218913	148218914	1	0.6098	0.875	0.1667	1	0.6842	ENSSSCG00000010749	-0.172303	0.0939	FAM196A	7.5238	2.7485	1.45282	1.47e-29	two	6414588	0.61053	0.782833	-0.172303	0.0939	-1.83496	0.0771692	0.0923307	0.0665112	0.486403	148218914	promoter-TSS (ENSSSCT00000027143)	-605	ENSSSCT00000027143	FAM196A
chr14	148218921	148218922	1	0.6364	0.8	0.25	1	0.7778	ENSSSCG00000010749	-0.172303	0.0809321	FAM196A	7.5238	2.7485	1.45282	1.47e-29	two	6414589	0.61053	0.782833	-0.172303	0.0809321	-2.12898	0.133956	0.191171	0.0332557	0.340795	148218922	promoter-TSS (ENSSSCT00000027143)	-597	ENSSSCT00000027143	FAM196A
chr14	152229320	152229321	0.9394	0.3571	1	1	1	0.8667	ENSSSCG00000024633	-0.124086	0.0811306	JAKMIP3	13.5698	9.17148	0.565171	1.91e-10	two	6489164	0.744772	0.868858	-0.124086	0.0811306	-1.52946	0.0652814	0.051821	0.12615	0.642953	152229321	promoter-TSS (ENSSSCT00000023262)	-655	ENSSSCT00000023262	JAKMIP3
chr14	152229387	152229388	1	0.6364	0.8182	0.7333	1	0.8235	ENSSSCG00000024633	-0.100197	0.0884475	JAKMIP3	13.5698	9.17148	0.565171	1.91e-10	two	6489165	0.720849	0.821047	-0.100197	0.0884475	-1.13285	0.0808734	0.0554043	0.257279	0.816954	152229388	promoter-TSS (ENSSSCT00000023262)	-588	ENSSSCT00000023262	JAKMIP3
chr14	16908364	16908365	0.7826	0.25	1	0.8125	0.9231	0	ENSSSCG00000009699	-0.141917	0.0778286	HPGD	6.87346	4.64985	0.563854	0.00444144	two	5422944	0.133277	0.275194	-0.141917	0.0778286	-1.82346	0.0608453	0.130975	0.068234	0.492369	16908365	promoter-TSS (ENSSSCT00000010634)	-265	ENSSSCT00000010634	HPGD
chr14	16908491	16908492	0.8571	0.6667	0.875	0.7778	0.375	0.8333	ENSSSCG00000009699	-0.32602	0.0966012	HPGD	6.87346	4.64985	0.563854	0.00444144	two	5422945	0.140193	0.466213	-0.32602	0.0966012	-3.37491	0.0746312	0.174928	0.000738396	0.0278952	16908492	promoter-TSS (ENSSSCT00000010634)	-138	ENSSSCT00000010634	HPGD
chr1	42198740	42198741	0.8889	1	0.8571	0.4118	1	1	ENSSSCG00000029277	-0.234126	0.157201	NKAIN2	70.597	39.2575	0.846638	6.1e-16	two	338255	0.616708	0.850833	-0.234126	0.157201	-1.48934	0.0746312	0.0704414	0.136397	0.662769	42198741	promoter-TSS (ENSSSCT00000023225)	-15	ENSSSCT00000023225	NKAIN2
chr14	23777711	23777712	0.8462	0.6923	0.8571	0.4815	0.1111	0.7692	ENSSSCG00000009724	-0.100915	0.0450362	ANHX	2.62292	0.84334	1.63699	0.000597435	two	5471927	0.516023	0.616939	-0.100915	0.0450362	-2.24076	0.0518198	0.0456424	0.0250415	0.29096	23777712	promoter-TSS (ENSSSCT00000010662)	-116	ENSSSCT00000010662	ANHX
chr14	23777732	23777733	0.9474	0.8462	0.9231	1	0.5385	0.8421	ENSSSCG00000009724	-0.104517	0.0420231	ANHX	2.62292	0.84334	1.63699	0.000597435	two	5471928	0.509098	0.613615	-0.104517	0.0420231	-2.48713	0.0616791	0.0651249	0.0128778	0.196034	23777733	promoter-TSS (ENSSSCT00000010662)	-95	ENSSSCT00000010662	ANHX
chr14	23777752	23777753	0.8571	0.8571	0.9167	0.9091	0.6667	0.7333	ENSSSCG00000009724	-0.10752	0.0360011	ANHX	2.62292	0.84334	1.63699	0.000597435	two	5471929	0.501323	0.608843	-0.10752	0.0360011	-2.98658	0.0567286	0.0863792	0.00282113	0.0723307	23777753	promoter-TSS (ENSSSCT00000010662)	-75	ENSSSCT00000010662	ANHX
chr14	23777774	23777775	0.8182	0.5806	0.625	0.8462	1	0.75	ENSSSCG00000009724	-0.130601	0.0320798	ANHX	2.62292	0.84334	1.63699	0.000597435	two	5471930	0.49557	0.626171	-0.130601	0.0320798	-4.07113	0.0524515	0.0553179	4.68e-05	0.00343418	23777775	promoter-TSS (ENSSSCT00000010662)	-53	ENSSSCT00000010662	ANHX
chr14	23777801	23777802	1	0.9118	0.1724	0.7059	0.8	0.5	ENSSSCG00000009724	-0.130601	0.0304562	ANHX	2.62292	0.84334	1.63699	0.000597435	two	5471931	0.49557	0.626171	-0.130601	0.0304562	-4.28816	0.053954	0.0550298	1.8e-05	0.00161351	23777802	promoter-TSS (ENSSSCT00000010662)	-26	ENSSSCT00000010662	ANHX
chr14	23777867	23777868	1	0.8333	0.9211	1	1	0.5909	ENSSSCG00000009724	-0.129953	0.0229619	ANHX	2.62292	0.84334	1.63699	0.000597435	two	5471932	0.520391	0.650345	-0.129953	0.0229619	-5.65953	0.527463	0.061894	1.52e-08	4.61e-06	23777868	promoter-TSS (ENSSSCT00000010662)	40	ENSSSCT00000010662	ANHX
chr14	23777892	23777893	0.7273	0.7	0.6364	0.7647	0.9048	0.5385	ENSSSCG00000009724	-0.132204	0.0263998	ANHX	2.62292	0.84334	1.63699	0.000597435	two	5471933	0.525299	0.657503	-0.132204	0.0263998	-5.00777	0.157538	0.0871067	5.51e-07	9.45e-05	23777893	promoter-TSS (ENSSSCT00000010662)	65	ENSSSCT00000010662	ANHX
chr14	23777894	23777895	0.75	1	0.8571	1	0.9583	0.5833	ENSSSCG00000009724	-0.132204	0.0278782	ANHX	2.62292	0.84334	1.63699	0.000597435	two	5471935	0.525299	0.657503	-0.132204	0.0278782	-4.74219	0.0994946	0.0808888	2.11e-06	0.000285943	23777895	promoter-TSS (ENSSSCT00000010662)	67	ENSSSCT00000010662	ANHX
chr14	23777903	23777904	0.9333	0.8571	0.7037	1	0.0476	0.625	ENSSSCG00000009724	-0.133848	0.0304458	ANHX	2.62292	0.84334	1.63699	0.000597435	two	5471937	0.521982	0.65583	-0.133848	0.0304458	-4.39627	0.0841529	0.0399217	1.1e-05	0.00108756	23777904	promoter-TSS (ENSSSCT00000010662)	76	ENSSSCT00000010662	ANHX
chr14	23777909	23777910	0.8537	0.5714	0.8667	0.8182	1	0.6538	ENSSSCG00000009724	-0.134718	0.0294497	ANHX	2.62292	0.84334	1.63699	0.000597435	two	5471938	0.519691	0.654409	-0.134718	0.0294497	-4.57453	0.129674	0.039857	4.77e-06	0.000554591	23777910	promoter-TSS (ENSSSCT00000010662)	82	ENSSSCT00000010662	ANHX
chr14	23777925	23777926	0.9535	0.2308	0.9091	0.9091	0.8235	0.7037	ENSSSCG00000009724	-0.134698	0.0262306	ANHX	2.62292	0.84334	1.63699	0.000597435	two	5471939	0.51936	0.654058	-0.134698	0.0262306	-5.13514	0.286857	0.0660818	2.82e-07	5.41e-05	23777926	promoter-TSS (ENSSSCT00000010662)	98	ENSSSCT00000010662	ANHX
chr14	40882672	40882673	0.8571	0.85	1	0.5556	1	0.8333	ENSSSCG00000009870	-0.188048	0.109974	SDSL	3.10004	1.35542	1.19355	9.69e-05	two	5625062	0.463808	0.651856	-0.188048	0.109974	-1.70994	0.0746312	0.0774583	0.0872776	0.55114	40882673	promoter-TSS (ENSSSCT00000010818)	-202	ENSSSCT00000010818	SDSL	L-serine/L-threonine ammonia-lyase
chr14	43874499	43874500	0.8	0.75	0.6875	0.6	1	0.1818	ENSSSCG00000009932	-0.102267	0.0350097	MMAB	10.8622	4.52611	1.26297	1.05e-29	two	5651963	0.0577657	0.160033	-0.102267	0.0350097	-2.9211	0.0812889	0.056638	0.00348798	0.083689	43874500	promoter-TSS (ENSSSCT00000010883)	263	ENSSSCT00000010884	MMAB	cob(I)alamin adenosyltransferase
chr14	43874502	43874503	0.3333	1	0.7059	0.5417	0.9048	0.1818	ENSSSCG00000009932	-0.106693	0.0372393	MMAB	10.8622	4.52611	1.26297	1.05e-29	two	5651964	0.0570986	0.163792	-0.106693	0.0372393	-2.86507	0.0869331	0.0565836	0.00416923	0.094459	43874503	promoter-TSS (ENSSSCT00000010883)	266	ENSSSCT00000010884	MMAB	cob(I)alamin adenosyltransferase
chr14	43874513	43874514	0.4286	1	0.7083	0.7027	1	0.1538	ENSSSCG00000009932	-0.111455	0.0506382	MMAB	10.8622	4.52611	1.26297	1.05e-29	two	5651965	0.0564048	0.16786	-0.111455	0.0506382	-2.201	0.0811421	0.0682482	0.027736	0.308221	43874514	promoter-TSS (ENSSSCT00000010883)	277	ENSSSCT00000010884	MMAB	cob(I)alamin adenosyltransferase
chr14	50990226	50990227	1	1	1	1	0	0.8182	ENSSSCG00000010017	-0.144059	0.0718589	SMTN	5.2735	3.62412	0.541132	0.000222473	two	5712517	0.744952	0.889011	-0.144059	0.0718589	-2.00475	0.0746312	0.0493659	0.0449893	0.400292	50990227	promoter-TSS (ENSSSCT00000010974)	-749	ENSSSCT00000010974	SMTN
chr14	65132890	65132891	0.6897	1	0.6429	0.6154	0.9048	0	ENSSSCG00000010188	-0.132749	0.0731451	ABCB10	17.7178	11.242	0.656303	1.64e-19	two	5835896	0.095141	0.22789	-0.132749	0.0731451	-1.81487	0.0746312	0.106422	0.0695437	0.496814	65132891	promoter-TSS (ENSSSCT00000011154)	43	ENSSSCT00000011154	ABCB10
chr14	65132897	65132898	0.7619	1	0	0.375	0.9444	0	ENSSSCG00000010188	-0.139879	0.0809741	ABCB10	17.7178	11.242	0.656303	1.64e-19	two	5835898	0.0978784	0.237757	-0.139879	0.0809741	-1.72745	0.0853001	0.108648	0.0840863	0.542102	65132898	promoter-TSS (ENSSSCT00000011154)	50	ENSSSCT00000011154	ABCB10
chr14	65132905	65132906	0.8947	0	0.6364	0.1429	0.8421	0	ENSSSCG00000010188	-0.131673	0.0787873	ABCB10	17.7178	11.242	0.656303	1.64e-19	two	5835900	0.100901	0.232574	-0.131673	0.0787873	-1.67125	0.0746312	0.113571	0.094673	0.571131	65132906	promoter-TSS (ENSSSCT00000011154)	58	ENSSSCT00000011154	ABCB10
chr14	65132907	65132908	1	1	0.3529	0.3333	0.8235	0	ENSSSCG00000010188	-0.139163	0.0846608	ABCB10	17.7178	11.242	0.656303	1.64e-19	two	5835902	0.104289	0.243452	-0.139163	0.0846608	-1.64378	0.0746312	0.116606	0.100222	0.585169	65132908	promoter-TSS (ENSSSCT00000011154)	60	ENSSSCT00000011154	ABCB10
chr14	65132920	65132921	1	0.9	0.8667	0.9048	1	0	ENSSSCG00000010188	-0.165961	0.099824	ABCB10	17.7178	11.242	0.656303	1.64e-19	two	5835904	0.105908	0.271869	-0.165961	0.099824	-1.66254	0.0746312	0.125887	0.0964051	0.575598	65132921	promoter-TSS (ENSSSCT00000011154)	73	ENSSSCT00000011154	ABCB10
chr14	65132930	65132931	1	0.8966	0.5238	0.35	0.7143	0	ENSSSCG00000010188	-0.180732	0.109814	ABCB10	17.7178	11.242	0.656303	1.64e-19	two	5835907	0.110319	0.291052	-0.180732	0.109814	-1.6458	0.0746312	0.133297	0.0998044	0.584158	65132931	promoter-TSS (ENSSSCT00000011154)	83	ENSSSCT00000011154	ABCB10
chr14	66161333	66161334	0.8621	0.9048	0.8571	1	1	0.6	ENSSSCG00000010199	-0.136591	0.10313	RET	2.80594	1.09514	1.35737	4.62e-19	two	5844567	0.632726	0.769317	-0.136591	0.10313	-1.32446	0.0991387	0.104053	0.18535	0.739254	66161334	promoter-TSS (ENSSSCT00000011165)	-382	ENSSSCT00000011165	RET	proto-oncogene tyrosine-protein kinase Ret
chr14	66161334	66161335	0.8462	1	0	0.1538	0.8	0.8571	ENSSSCG00000010199	-0.136591	0.0802156	RET	2.80594	1.09514	1.35737	4.62e-19	two	5844568	0.632726	0.769317	-0.136591	0.0802156	-1.7028	0.0532681	0.0625778	0.0886049	0.554868	66161335	promoter-TSS (ENSSSCT00000011165)	-381	ENSSSCT00000011165	RET	proto-oncogene tyrosine-protein kinase Ret
chr14	6866645	6866646	1	1	0.5455	0.8947	1	1	ENSSSCG00000030363	-0.107106	0.0746622	LGI3	30.6476	12.3942	1.30611	9.53e-48	two	5349642	0.81803	0.925136	-0.107106	0.0746622	-1.43454	0.155073	0.093978	0.151418	0.689077	6866646	promoter-TSS (ENSSSCT00000023580)	-729	ENSSSCT00000023580	LGI3
chr14	6866646	6866647	0.9524	0.7647	0.8571	0.8125	0	1	ENSSSCG00000030363	-0.107106	0.135063	LGI3	30.6476	12.3942	1.30611	9.53e-48	two	5349643	0.81803	0.925136	-0.107106	0.135063	-0.793007	0.0834848	0.0795676	0.427774	0.916169	6866647	promoter-TSS (ENSSSCT00000023580)	-730	ENSSSCT00000023580	LGI3
chr14	78302124	78302125	0.8824	0.52	0.6667	0.7778	1	0.8148	ENSSSCG00000010252	-0.225772	0.110977	HKDC1	4.11385	1.83062	1.16816	6.79e-16	two	5906976	0.598023	0.823795	-0.225772	0.110977	-2.0344	0.155087	0.0377095	0.0419112	0.385804	78302125	promoter-TSS (ENSSSCT00000011222)	-292	ENSSSCT00000011222	HKDC1	hexokinase
chr15	131156849	131156850	0.8	0.7143	1	1	0.7778	0.55	ENSSSCG00000016175	-0.124328	0.127812	MREG	3.91099	1.40922	1.47264	1.84e-07	two	7174803	0.354935	0.479263	-0.124328	0.127812	-0.972747	0.0976479	0.0579065	0.330679	0.86982	131156850	promoter-TSS (ENSSSCT00000017612)	-399	ENSSSCT00000017612	MREG
chr15	133034789	133034790	1	0.5484	0.6875	0.75	0.4688	0.4667	ENSSSCG00000027669	-0.114648	0.0453768	TNS1	11.908	6.71405	0.82667	2.04e-24	two	7183546	0.546618	0.661266	-0.114648	0.0453768	-2.52658	0.0746312	0.0554503	0.011518	0.1829	133034790	promoter-TSS (ENSSSCT00000036673)	-650	ENSSSCT00000036673	TNS1
chr15	133034824	133034825	0.6364	0.7037	0.3636	1	0.7742	0.6	ENSSSCG00000027669	-0.108895	0.0454663	TNS1	11.908	6.71405	0.82667	2.04e-24	two	7183547	0.544391	0.653286	-0.108895	0.0454663	-2.39508	0.0746312	0.0756306	0.0166168	0.228864	133034825	promoter-TSS (ENSSSCT00000036673)	-685	ENSSSCT00000036673	TNS1
chr15	133034849	133034850	0.6364	0.8667	1	1	0.7	0.2857	ENSSSCG00000027669	-0.108895	0.0344413	TNS1	11.908	6.71405	0.82667	2.04e-24	two	7183548	0.544391	0.653286	-0.108895	0.0344413	-3.16177	0.0746312	0.209365	0.00156814	0.0479509	133034850	promoter-TSS (ENSSSCT00000036673)	-710	ENSSSCT00000036673	TNS1
chr15	133034850	133034851	0.8696	0.75	0.8	1	0.8182	0.5	ENSSSCG00000027669	-0.108895	0.0509207	TNS1	11.908	6.71405	0.82667	2.04e-24	two	7183549	0.544391	0.653286	-0.108895	0.0509207	-2.13853	0.439342	0.392633	0.0324739	0.336405	133034851	promoter-TSS (ENSSSCT00000036673)	-711	ENSSSCT00000036673	TNS1
chr15	133084771	133084772	0.875	0.3333	1	0.5	1	0.4545	ENSSSCG00000027669	-0.10087	0.0525689	TNS1	11.908	6.71405	0.82667	2.04e-24	two	7184256	0.226346	0.327216	-0.10087	0.0525689	-1.91881	0.046645	0.0707985	0.0550085	0.443295	133084772	promoter-TSS (ENSSSCT00000036142)	-361	ENSSSCT00000036142	TNS1
chr15	134354782	134354783	0.6667	0.8182	0.6531	0.4	0.6	0.5	ENSSSCG00000016217	-0.11855	0.0985489	DNAJB2	87.317	53.0649	0.718504	5.93e-27	two	7197929	0.0869594	0.205509	-0.11855	0.0985489	-1.20296	0.0322261	0.0787158	0.228993	0.790381	134354783	promoter-TSS (ENSSSCT00000017658)	-517	ENSSSCT00000017658	DNAJB2	DnaJ homolog subfamily B member 2
chr15	147164013	147164014	0.5217	1	0.913	0.75	0.5	0.2	ENSSSCG00000025038	-0.114035	0.145201	KCNJ13	3.1941	1.26777	1.33311	4.12e-13	two	7297963	0.219128	0.333162	-0.114035	0.145201	-0.78536	0.0523895	0.0537916	0.432243	0.917828	147164014	promoter-TSS (ENSSSCT00000025634)	53	ENSSSCT00000025634	KCNJ13	potassium inwardly-rectifying channel subfamily J member 13
chr15	154472816	154472817	0.8125	1	0	0.9167	0.9231	0.8182	ENSSSCG00000016365	-0.138013	0.0473064	ANKMY1	1.34116	0.384131	1.80381	1.93e-08	two	7392801	0.665599	0.803613	-0.138013	0.0473064	-2.91743	0.0746312	0.0939503	0.00352924	0.0843617	154472817	promoter-TSS (ENSSSCT00000017820)	-926	ENSSSCT00000017820	ANKMY1
chr15	21862558	21862559	0	1	1	0.7857	1	1	ENSSSCG00000023479	-0.156316	0.0282938	NCKAP5	27.4246	14.9062	0.879554	5.24e-41	two	6598977	0.793862	0.950178	-0.156316	0.0282938	-5.52475	0.0746312	0.105541	3.3e-08	8.91e-06	21862559	promoter-TSS (ENSSSCT00000025228)	87	ENSSSCT00000025228
chr15	21862562	21862563	1	0.9394	1	0.8571	0.8824	1	ENSSSCG00000023479	-0.156316	0.0263871	NCKAP5	27.4246	14.9062	0.879554	5.24e-41	two	6598978	0.793862	0.950178	-0.156316	0.0263871	-5.92394	0.0746312	0.0886063	3.14e-09	1.2e-06	21862563	promoter-TSS (ENSSSCT00000025228)	91	ENSSSCT00000025228
chr15	21862563	21862564	0.8182	1	1	1	0.619	1	ENSSSCG00000023479	-0.156316	0.0282938	NCKAP5	27.4246	14.9062	0.879554	5.24e-41	two	6598979	0.793862	0.950178	-0.156316	0.0282938	-5.52475	0.0746312	0.105541	3.3e-08	8.91e-06	21862564	promoter-TSS (ENSSSCT00000025228)	92	ENSSSCT00000025228
chr15	37769997	37769998	0.5	0.9123	0.8	0.4545	0.913	0	ENSSSCG00000023155	-0.114066	0.0646745	CLN8	31.6303	17.091	0.888073	1.14e-30	two	6683918	0.102548	0.216614	-0.114066	0.0646745	-1.76369	0.106304	0.097293	0.0777838	0.52335	37769998	promoter-TSS (ENSSSCT00000027260)	-245	ENSSSCT00000027260	CLN8
chr15	37769999	37770000	0.5	0.7879	0.9286	0.6	0.963	0.2	ENSSSCG00000023155	-0.114066	0.0679239	CLN8	31.6303	17.091	0.888073	1.14e-30	two	6683919	0.102548	0.216614	-0.114066	0.0679239	-1.67932	0.0625448	0.0575862	0.0930897	0.56696	37770000	promoter-TSS (ENSSSCT00000027260)	-243	ENSSSCT00000027260	CLN8
chr15	53285737	53285738	0.8667	0.4444	0.9	0.9231	0.7778	1	ENSSSCG00000015795	-0.104776	0.0738503	CCDC110	0.946505	0.652319	0.537031	0.0250523	two	6749762	0.599686	0.704462	-0.104776	0.0738503	-1.41876	0.246545	0.211569	0.155969	0.696502	53285738	promoter-TSS (ENSSSCT00000017198)	-536	ENSSSCT00000017198	CCDC110
chr15	53285746	53285747	0.6	0.7647	0.8235	0.9286	0.7308	1	ENSSSCG00000015795	-0.104776	0.0851231	CCDC110	0.946505	0.652319	0.537031	0.0250523	two	6749763	0.599686	0.704462	-0.104776	0.0851231	-1.23088	0.167803	0.211569	0.218369	0.779146	53285747	promoter-TSS (ENSSSCT00000017198)	-545	ENSSSCT00000017198	CCDC110
chr15	55455687	55455688	0.7857	0	0.2727	0.8333	1	0.6	ENSSSCG00000015818	-0.109401	0.132455	DDHD2	95.3421	67.3802	0.500789	2.61e-20	two	6764635	0.571807	0.681208	-0.109401	0.132455	-0.825952	0.0746312	0.0513078	0.408831	0.908639	55455688	promoter-TSS (ENSSSCT00000017226)	-493	ENSSSCT00000017226	DDHD2
chr15	62143854	62143855	1	1	1	1	0.7857	0	ENSSSCG00000015846	-0.206682	0.086937	RBPMS	2.87187	1.79416	0.678682	0.00840914	two	6809323	0.0723736	0.279055	-0.206682	0.086937	-2.37737	0.0944631	0.108169	0.0174364	0.235538	62143855	promoter-TSS (ENSSSCT00000017254)	-260	ENSSSCT00000017254	RBPMS
chr15	62144025	62144026	0.9091	0.6154	0.9286	0.8421	0.9024	0	ENSSSCG00000015846	-0.104623	0.0380585	RBPMS	2.87187	1.79416	0.678682	0.00840914	two	6809330	0.0805633	0.185187	-0.104623	0.0380585	-2.74902	0.0746312	0.123418	0.00597743	0.1201	62144026	promoter-TSS (ENSSSCT00000017254)	-431	ENSSSCT00000017254	RBPMS
chr15	71285639	71285640	0.8182	0.5319	0.8462	0.5333	1	0.6316	ENSSSCG00000021297	-0.197199	0.132233	ERMN	380.132	120.027	1.66314	7.2e-181	two	6857177	0.369316	0.566515	-0.197199	0.132233	-1.4913	0.0952131	0.114509	0.135883	0.661833	71285640	promoter-TSS (ENSSSCT00000029596)	-40	ENSSSCT00000029596	ERMN
chr15	74326012	74326013	0.9474	1	1	0.2	1	0.4	ENSSSCG00000015885	-0.166114	0.15077	PLA2R1	112.592	27.7107	2.02259	1.19e-301	two	6873392	0.495327	0.66144	-0.166114	0.15077	-1.10177	0.222307	0.123704	0.270562	0.82817	74326013	promoter-TSS (ENSSSCT00000017297)	-203	ENSSSCT00000017297	PLA2R1	mannose receptor, C type
chr15	74547987	74547988	1	0.8462	1	1	0.6364	0.15	ENSSSCG00000015888	-0.103036	0.0394329	RBMS1	7.50195	4.798	0.644832	4.94e-06	two	6875137	0.241136	0.344172	-0.103036	0.0394329	-2.61294	0.378337	0.162572	0.00897668	0.156325	74547988	promoter-TSS (ENSSSCT00000017300)	-511	ENSSSCT00000017300	RBMS1
chr15	74548008	74548009	0.8	0.8462	1	0.8333	0.9412	0.3333	ENSSSCG00000015888	-0.106848	0.0563699	RBMS1	7.50195	4.798	0.644832	4.94e-06	two	6875138	0.25883	0.365678	-0.106848	0.0563699	-1.89548	0.0386276	0.055758	0.0580286	0.455186	74548009	promoter-TSS (ENSSSCT00000017300)	-532	ENSSSCT00000017300	RBMS1
chr15	74548019	74548020	0.9298	0.7692	0.84	0.8182	0.6	0.12	ENSSSCG00000015888	-0.106848	0.0399406	RBMS1	7.50195	4.798	0.644832	4.94e-06	two	6875139	0.25883	0.365678	-0.106848	0.0399406	-2.67518	0.158097	0.216049	0.00746894	0.13891	74548020	promoter-TSS (ENSSSCT00000017300)	-543	ENSSSCT00000017300	RBMS1
chr16	29026791	29026792	0.8913	1	0.8	1	0.8	0.8182	ENSSSCG00000021208	-0.143324	0.112352	SEPP1	209.115	120.829	0.791332	9.15e-44	two	7571222	0.671043	0.814368	-0.143324	0.112352	-1.27567	0.0660303	0.0545236	0.202072	0.760373	29026792	promoter-TSS (ENSSSCT00000031007)	-296	ENSSSCT00000031007	SEPP1
chr16	47777476	47777477	1	1	0.5	0.9474	0.4	1	ENSSSCG00000016953	-0.109322	0.105625	ERBB2IP	222.076	143.873	0.626258	1.65e-28	two	7666361	0.843266	0.952588	-0.109322	0.105625	-1.035	0.0577537	0.0785785	0.300669	0.850723	47777477	promoter-TSS (ENSSSCT00000018461)	-630	ENSSSCT00000018461	ERBB2IP
chr16	47778007	47778008	1	0.6154	0.9487	0.65	1	1	ENSSSCG00000016953	-0.473244	0.126128	ERBB2IP	222.076	143.873	0.626258	1.65e-28	two	7666362	0.477489	0.950732	-0.473244	0.126128	-3.75209	0.0519283	0.0782462	0.000175368	0.00953386	47778008	promoter-TSS (ENSSSCT00000018461)	-99	ENSSSCT00000018461	ERBB2IP
chr17	36210816	36210817	1	1	0	1	0.8889	0.4	ENSSSCG00000007143	-0.135504	0.0525553	MAVS	8.02622	5.49644	0.546222	6.16e-08	two	8218326	0.300862	0.436366	-0.135504	0.0525553	-2.57831	0.0746312	0.0583884	0.00992841	0.166654	36210817	promoter-TSS (ENSSSCT00000034089)	-642	ENSSSCT00000034089	MAVS	mitochondrial antiviral-signaling protein
chr17	36210832	36210833	1	0.7895	0	1	1	0.9091	ENSSSCG00000007143	-0.16105	0.0560775	MAVS	8.02622	5.49644	0.546222	6.16e-08	two	8218327	0.41085	0.5719	-0.16105	0.0560775	-2.87192	0.164912	0.162521	0.00407986	0.0930875	36210833	promoter-TSS (ENSSSCT00000034089)	-658	ENSSSCT00000034089	MAVS	mitochondrial antiviral-signaling protein
chr17	36210844	36210845	0.6	0.7826	0	0.9412	1	0.5	ENSSSCG00000007143	-0.16105	0.0677867	MAVS	8.02622	5.49644	0.546222	6.16e-08	two	8218328	0.41085	0.5719	-0.16105	0.0677867	-2.37583	0.0588788	0.0572963	0.0175093	0.236131	36210845	promoter-TSS (ENSSSCT00000034089)	-670	ENSSSCT00000034089	MAVS	mitochondrial antiviral-signaling protein
chr17	42151522	42151523	0.9231	0.8	0.8125	1	0.9	1	ENSSSCG00000007269	-0.123322	0.0576376	PXMP4	2.89266	1.13559	1.34895	0.00188379	two	8273603	0.724764	0.848086	-0.123322	0.0576376	-2.13961	0.0850424	0.199835	0.0323867	0.335908	42151523	promoter-TSS (ENSSSCT00000007954)	-721	ENSSSCT00000007954	PXMP4	peroxisomal membrane protein 4
chr17	42151537	42151538	0.3333	1	1	0.7059	1	1	ENSSSCG00000007269	-0.123322	0.0545448	PXMP4	2.89266	1.13559	1.34895	0.00188379	two	8273604	0.724764	0.848086	-0.123322	0.0545448	-2.26092	0.126035	0.263129	0.023764	0.282375	42151538	promoter-TSS (ENSSSCT00000007954)	-736	ENSSSCT00000007954	PXMP4	peroxisomal membrane protein 4
chr17	42151547	42151548	0.4615	1	0.6154	0.5882	0.85	1	ENSSSCG00000007269	-0.127842	0.0637093	PXMP4	2.89266	1.13559	1.34895	0.00188379	two	8273605	0.717674	0.845517	-0.127842	0.0637093	-2.00665	0.214035	0.258692	0.0447867	0.399347	42151548	promoter-TSS (ENSSSCT00000007954)	-746	ENSSSCT00000007954	PXMP4	peroxisomal membrane protein 4
chr17	42151553	42151554	0.8049	1	0.6	0.8235	0.9048	1	ENSSSCG00000007269	-0.127842	0.0803514	PXMP4	2.89266	1.13559	1.34895	0.00188379	two	8273606	0.717674	0.845517	-0.127842	0.0803514	-1.59104	0.0580073	0.10756	0.1116	0.612002	42151554	promoter-TSS (ENSSSCT00000007954)	-752	ENSSSCT00000007954	PXMP4	peroxisomal membrane protein 4
chr17	42151555	42151556	0.9048	0.9091	1	1	1	1	ENSSSCG00000007269	-0.127842	0.0845029	PXMP4	2.89266	1.13559	1.34895	0.00188379	two	8273607	0.717674	0.845517	-0.127842	0.0845029	-1.51288	0.0545742	0.0861715	0.130311	0.651238	42151556	promoter-TSS (ENSSSCT00000007954)	-754	ENSSSCT00000007954	PXMP4	peroxisomal membrane protein 4
chr17	42151595	42151596	0.9167	1	1	0.8889	1	0.6364	ENSSSCG00000007269	-0.115669	0.077439	PXMP4	2.89266	1.13559	1.34895	0.00188379	two	8273608	0.738563	0.854231	-0.115669	0.077439	-1.49368	0.100108	0.111291	0.13526	0.660688	42151596	promoter-TSS (ENSSSCT00000007954)	-794	ENSSSCT00000007954	PXMP4	peroxisomal membrane protein 4
chr17	42151637	42151638	0.7917	1	1	0.9111	0.8	0.8333	ENSSSCG00000007269	-0.115669	0.0536705	PXMP4	2.89266	1.13559	1.34895	0.00188379	two	8273610	0.738563	0.854231	-0.115669	0.0536705	-2.15516	0.0747572	0.0601991	0.0311492	0.328769	42151638	promoter-TSS (ENSSSCT00000007954)	-836	ENSSSCT00000007954	PXMP4	peroxisomal membrane protein 4
chr17	43558859	43558860	0.6604	0.6	1	0.8636	1	0.8	ENSSSCG00000007288	-0.173522	0.113581	MYH7B	4.13654	2.7031	0.613809	1.37e-07	two	8283413	0.451848	0.62537	-0.173522	0.113581	-1.52773	0.0746312	0.0720569	0.126579	0.643832	43558860	promoter-TSS (ENSSSCT00000007974)	-693	ENSSSCT00000007974	MYH7B	myosin heavy chain
chr17	43558862	43558863	0.75	0.3182	1	0.8333	0	0.8	ENSSSCG00000007288	-0.173522	0.113581	MYH7B	4.13654	2.7031	0.613809	1.37e-07	two	8283414	0.451848	0.62537	-0.173522	0.113581	-1.52773	0.0746312	0.0720569	0.126579	0.643832	43558863	promoter-TSS (ENSSSCT00000007974)	-690	ENSSSCT00000007974	MYH7B	myosin heavy chain
chr17	49457505	49457506	0.9565	0.75	1	0.8947	0.9167	0	ENSSSCG00000007358	-0.106271	0.0474645	EMILIN3	0.692097	0.324663	1.09203	0.0204359	two	8337975	0.0710992	0.177371	-0.106271	0.0474645	-2.23897	0.105583	0.083556	0.0251581	0.291722	49457506	promoter-TSS (ENSSSCT00000008050)	92	ENSSSCT00000008050	EMILIN3
chr17	49457510	49457511	0.8947	0.2	0.9	0.3913	1	0	ENSSSCG00000007358	-0.106271	0.0399625	EMILIN3	0.692097	0.324663	1.09203	0.0204359	two	8337977	0.0710992	0.177371	-0.106271	0.0399625	-2.65927	0.104245	0.177186	0.00783091	0.143205	49457511	promoter-TSS (ENSSSCT00000008050)	87	ENSSSCT00000008050	EMILIN3
chr17	49457512	49457513	0.9444	0.8	1	1	1	0	ENSSSCG00000007358	-0.106271	0.0398928	EMILIN3	0.692097	0.324663	1.09203	0.0204359	two	8337979	0.0710992	0.177371	-0.106271	0.0398928	-2.66392	0.105583	0.181294	0.00772358	0.141934	49457513	promoter-TSS (ENSSSCT00000008050)	85	ENSSSCT00000008050	EMILIN3
chr17	49457514	49457515	1	0.7273	0.8333	0.9091	0.9474	0	ENSSSCG00000007358	-0.106271	0.0399672	EMILIN3	0.692097	0.324663	1.09203	0.0204359	two	8337981	0.0710992	0.177371	-0.106271	0.0399672	-2.65897	0.104366	0.171466	0.00783806	0.143291	49457515	promoter-TSS (ENSSSCT00000008050)	83	ENSSSCT00000008050	EMILIN3
chr17	49457521	49457522	0.25	0.2308	1	0.8636	0.9412	0	ENSSSCG00000007358	-0.106271	0.0400372	EMILIN3	0.692097	0.324663	1.09203	0.0204359	two	8337983	0.0710992	0.177371	-0.106271	0.0400372	-2.65431	0.100479	0.162791	0.00794698	0.144561	49457522	promoter-TSS (ENSSSCT00000008050)	76	ENSSSCT00000008050	EMILIN3
chr17	49457539	49457540	0.875	0.1	0.6923	0.8769	0.7857	0	ENSSSCG00000007358	-0.106271	0.0400364	EMILIN3	0.692097	0.324663	1.09203	0.0204359	two	8337985	0.0710992	0.177371	-0.106271	0.0400364	-2.65437	0.101698	0.138178	0.00794575	0.144548	49457540	promoter-TSS (ENSSSCT00000008050)	58	ENSSSCT00000008050	EMILIN3
chr17	49457545	49457546	0.6923	0.7692	0.8667	0.8676	0.7647	0	ENSSSCG00000007358	-0.106271	0.0400878	EMILIN3	0.692097	0.324663	1.09203	0.0204359	two	8337986	0.0710992	0.177371	-0.106271	0.0400878	-2.65097	0.104366	0.138178	0.00802617	0.145478	49457546	promoter-TSS (ENSSSCT00000008050)	52	ENSSSCT00000008050	EMILIN3
chr17	49457557	49457558	0.8824	0.8889	1	0.863	0.8333	0.2	ENSSSCG00000007358	-0.106271	0.0435743	EMILIN3	0.692097	0.324663	1.09203	0.0204359	two	8337990	0.0710992	0.177371	-0.106271	0.0435743	-2.43885	0.104366	0.0740318	0.0147339	0.2128	49457558	promoter-TSS (ENSSSCT00000008050)	40	ENSSSCT00000008050	EMILIN3
chr18	25232079	25232080	1	0.9565	0.9333	1	0.85	0.7273	ENSSSCG00000016602	-0.121528	0.0665981	HYAL4	0.467052	0.1444	1.69351	0.0417779	two	8877151	0.510018	0.631545	-0.121528	0.0665981	-1.82479	0.0746312	0.0672056	0.0680323	0.491682	25232080	promoter-TSS (ENSSSCT00000018075)	-400	ENSSSCT00000018075	HYAL4	hyaluronoglucosaminidase
chr18	25232218	25232219	0.9091	0.8	0.6429	0.8571	0.8182	0.5294	ENSSSCG00000016602	-0.135441	0.100702	HYAL4	0.467052	0.1444	1.69351	0.0417779	two	8877153	0.487215	0.622656	-0.135441	0.100702	-1.34497	0.173163	0.105122	0.178636	0.730123	25232219	promoter-TSS (ENSSSCT00000018075)	-539	ENSSSCT00000018075	HYAL4	hyaluronoglucosaminidase
chr18	25232323	25232324	1	1	0.5	0.7647	0.7895	0.8667	ENSSSCG00000016602	-0.151616	0.116095	HYAL4	0.467052	0.1444	1.69351	0.0417779	two	8877155	0.462539	0.614155	-0.151616	0.116095	-1.30597	0.13138	0.167099	0.191564	0.74738	25232324	promoter-TSS (ENSSSCT00000018075)	-644	ENSSSCT00000018075	HYAL4	hyaluronoglucosaminidase
chr18	31805391	31805392	0.9474	1	0.4667	0.8077	0.9048	0.7692	ENSSSCG00000016635	-0.106264	0.0690556	CAV2	14.6334	10.2987	0.506797	5.4e-11	two	8917852	0.46427	0.570534	-0.106264	0.0690556	-1.53882	0.144844	0.197794	0.123848	0.638342	31805392	promoter-TSS (ENSSSCT00000018113)	-202	ENSSSCT00000018113	CAV2	caveolin 2
chr18	6546266	6546267	1	0.4615	0.8824	1	0.8125	0.6364	ENSSSCG00000027024	-0.1208	0.0247623	ASIC3	0.962731	0.48345	0.993767	0.01753	two	8718269	0.661104	0.781904	-0.1208	0.0247623	-4.87839	0.0746312	0.0473757	1.07e-06	0.000163394	6546267	promoter-TSS (ENSSSCT00000027326)	73	ENSSSCT00000027326	ASIC3	acid-sensing ion channel 3
chr18	6546280	6546281	1	1	0.9333	0.913	0.8571	1	ENSSSCG00000027024	-0.12344	0.0322518	ASIC3	0.962731	0.48345	0.993767	0.01753	two	8718270	0.630345	0.753785	-0.12344	0.0322518	-3.82737	0.0596011	0.128261	0.000129518	0.0075608	6546281	promoter-TSS (ENSSSCT00000027326)	59	ENSSSCT00000027326	ASIC3	acid-sensing ion channel 3
chr18	6546288	6546289	0.92	0.5385	0.5	1	0.9	0.6667	ENSSSCG00000027024	-0.111153	0.0338046	ASIC3	0.962731	0.48345	0.993767	0.01753	two	8718271	0.623966	0.735118	-0.111153	0.0338046	-3.28809	0.0704056	0.0500893	0.00100869	0.0349919	6546289	promoter-TSS (ENSSSCT00000027326)	51	ENSSSCT00000027326	ASIC3	acid-sensing ion channel 3
chr18	6546295	6546296	1	0.4828	0.8889	1	1	1	ENSSSCG00000027024	-0.108812	0.0371147	ASIC3	0.962731	0.48345	0.993767	0.01753	two	8718272	0.613975	0.722787	-0.108812	0.0371147	-2.93179	0.0948502	0.183881	0.00337018	0.0817457	6546296	promoter-TSS (ENSSSCT00000027326)	44	ENSSSCT00000027326	ASIC3	acid-sensing ion channel 3
chr18	6546301	6546302	0.7273	0.58	0.8182	1	0.6923	1	ENSSSCG00000027024	-0.107768	0.0232078	ASIC3	0.962731	0.48345	0.993767	0.01753	two	8718273	0.591697	0.699464	-0.107768	0.0232078	-4.64361	0.411458	0.227083	3.42e-06	0.000423559	6546302	promoter-TSS (ENSSSCT00000027326)	38	ENSSSCT00000027326	ASIC3	acid-sensing ion channel 3
chr18	6546306	6546307	0.8966	0.7838	0.8095	1	1	0.8	ENSSSCG00000027024	-0.100419	0.0355427	ASIC3	0.962731	0.48345	0.993767	0.01753	two	8718274	0.567979	0.668398	-0.100419	0.0355427	-2.82531	0.17395	0.15743	0.00472347	0.102733	6546307	promoter-TSS (ENSSSCT00000027326)	33	ENSSSCT00000027326	ASIC3	acid-sensing ion channel 3
chr1	9412162	9412163	0.3158	0.8333	0.625	0.9592	1	0	ENSSSCG00000004049	-0.101132	0.0741576	ACAT2	116.2	58.2263	0.996861	8.76e-56	two	102705	0.069842	0.170974	-0.101132	0.0741576	-1.36374	0.0811595	0.0931773	0.172649	0.721756	9412163	promoter-TSS (ENSSSCT00000004477)	-390	ENSSSCT00000004477	ACAT2	acetyl-CoA C-acetyltransferase
chr2	105760734	105760735	0.6136	0.8462	1	1	0.6923	1	ENSSSCG00000026175	-0.208934	0.0712042	FAM81B	0.577432	0.115211	2.32538	0.00466117	two	9996292	0.617653	0.826587	-0.208934	0.0712042	-2.93429	0.0798322	0.137964	0.00334309	0.0812914	105760735	promoter-TSS (ENSSSCT00000029964)	-55	ENSSSCT00000029964	FAM81B
chr2	105760764	105760765	0.7647	0.8667	1	0.9545	0.5405	1	ENSSSCG00000026175	-0.208934	0.0746061	FAM81B	0.577432	0.115211	2.32538	0.00466117	two	9996293	0.617653	0.826587	-0.208934	0.0746061	-2.80049	0.0599611	0.166267	0.00510246	0.108166	105760765	promoter-TSS (ENSSSCT00000029964)	-25	ENSSSCT00000029964	FAM81B
chr2	105760813	105760814	0.75	1	1	1	0.3846	0.7407	ENSSSCG00000026175	-0.208934	0.13035	FAM81B	0.577432	0.115211	2.32538	0.00466117	two	9996294	0.617653	0.826587	-0.208934	0.13035	-1.60287	0.0453747	0.0572856	0.108964	0.60603	105760814	promoter-TSS (ENSSSCT00000029964)	24	ENSSSCT00000029964	FAM81B
chr2	119133024	119133025	0.8649	0.9167	0.0588	0.8182	0.5714	1	ENSSSCG00000014195	-0.283199	0.0750532	MAN2A1	32.8673	19.5062	0.752723	4.85e-37	two	10056511	0.64184	0.925039	-0.283199	0.0750532	-3.77331	0.0723465	0.103287	0.000161095	0.00893459	119133025	promoter-TSS (ENSSSCT00000015510)	-730	ENSSSCT00000015510	MAN2A1	alpha-mannosidase II
chr2	20212643	20212644	0.4706	0.4286	1	0.8182	0.7778	0.3	ENSSSCG00000021739	-0.153957	0.0437165	HSD17B12	95.0187	54.8624	0.792393	7.67e-12	two	9422569	0.229196	0.383153	-0.153957	0.0437165	-3.5217	0.0640352	0.0630381	0.000428783	0.018696	20212644	promoter-TSS (ENSSSCT00000031374)	-694	ENSSSCT00000027104	HSD17B12
chr2	20212768	20212769	1	0.8667	1	1	0.75	0.8788	ENSSSCG00000021739	-0.151419	0.0839299	HSD17B12	95.0187	54.8624	0.792393	7.67e-12	two	9422570	0.623473	0.774892	-0.151419	0.0839299	-1.80411	0.174681	0.0592465	0.0712136	0.502415	20212769	promoter-TSS (ENSSSCT00000031374)	-819	ENSSSCT00000027104	HSD17B12
chr2	40466487	40466488	0.9524	1	1	1	0.8182	0	ENSSSCG00000013344	-0.102049	0.0279462	ANO5	22.852	13.3704	0.773278	3.85e-27	two	9542349	0.126158	0.228207	-0.102049	0.0279462	-3.65164	0.0913478	0.12775	0.00026057	0.0128794	40466488	promoter-TSS (ENSSSCT00000028769)	-242	ENSSSCT00000028769	ANO5
chr2	47254123	47254124	1	0.8333	1	0.8571	1	0	ENSSSCG00000026512	-0.156967	0.119503	CALCA	1.7858	0	Inf	2.37e-17	two	9591348	0.0786046	0.235571	-0.156967	0.119503	-1.3135	0.0440885	0.375139	0.189015	0.744109	47254124	promoter-TSS (ENSSSCT00000028268)	-246	ENSSSCT00000026203	CALCA
chr2	5130481	5130482	0.4	1	0.8333	1	0.8462	0.0952	ENSSSCG00000012950	-0.11276	0.102685	RIN1	1.50692	1.04807	0.523871	0.0432831	two	9277811	0.29181	0.40457	-0.11276	0.102685	-1.09812	0.181061	0.476093	0.272154	0.829468	5130482	promoter-TSS (ENSSSCT00000014155)	-760	ENSSSCT00000014155	RIN1	Ras and Rab interactor 1
chr2	5130501	5130502	1	0.7333	0.8333	0.8462	0.8571	0.1852	ENSSSCG00000012950	-0.104438	0.0998478	RIN1	1.50692	1.04807	0.523871	0.0432831	two	9277812	0.310174	0.414612	-0.104438	0.0998478	-1.04597	0.163748	0.113268	0.295575	0.847127	5130502	promoter-TSS (ENSSSCT00000014155)	-740	ENSSSCT00000014155	RIN1	Ras and Rab interactor 1
chr2	5130554	5130555	0.9375	0.8333	0.3571	1	0.8462	0.5714	ENSSSCG00000012950	-0.121459	0.11161	RIN1	1.50692	1.04807	0.523871	0.0432831	two	9277813	0.289781	0.411241	-0.121459	0.11161	-1.08825	0.0594415	0.08963	0.276487	0.832871	5130555	promoter-TSS (ENSSSCT00000014155)	-687	ENSSSCT00000014155	RIN1	Ras and Rab interactor 1
chr2	5130593	5130594	0.8182	0.8333	0.1667	0.6429	1	0.9	ENSSSCG00000012950	-0.11532	0.0603105	RIN1	1.50692	1.04807	0.523871	0.0432831	two	9277814	0.254519	0.369839	-0.11532	0.0603105	-1.9121	0.0749924	0.228798	0.0558627	0.44668	5130594	promoter-TSS (ENSSSCT00000014155)	-648	ENSSSCT00000014155	RIN1	Ras and Rab interactor 1
chr2	5130595	5130596	0.8676	1	0.1765	0.5455	1	0.5833	ENSSSCG00000012950	-0.11532	0.0574199	RIN1	1.50692	1.04807	0.523871	0.0432831	two	9277815	0.254519	0.369839	-0.11532	0.0574199	-2.00836	0.0700882	0.0916365	0.0446045	0.398516	5130596	promoter-TSS (ENSSSCT00000014155)	-646	ENSSSCT00000014155	RIN1	Ras and Rab interactor 1
chr2	59343903	59343904	0.7692	0.9286	0.8077	0.7917	0.85	0.0769	ENSSSCG00000013893	-0.104394	0.0317371	ARRDC2	12.0302	5.44357	1.14404	7.21e-28	two	9664988	0.107393	0.211786	-0.104394	0.0317371	-3.28932	0.0836884	0.141545	0.00100429	0.0348818	59343904	promoter-TSS (ENSSSCT00000015179)	-6	ENSSSCT00000015179	ARRDC2
chr2	59343913	59343914	0.8462	0.8	0.963	1	0.9167	0.0667	ENSSSCG00000013893	-0.105564	0.0302057	ARRDC2	12.0302	5.44357	1.14404	7.21e-28	two	9664989	0.106751	0.212316	-0.105564	0.0302057	-3.49485	0.207143	0.147868	0.000474325	0.0201515	59343914	promoter-TSS (ENSSSCT00000015179)	-16	ENSSSCT00000015179	ARRDC2
chr2	6214328	6214329	0.2857	0.4167	0.8966	0.6833	0.4286	0.9091	ENSSSCG00000013004	-0.100892	0.093933	TM7SF2	21.2576	12.7625	0.736066	2.17e-16	two	9294267	0.781775	0.882667	-0.100892	0.093933	-1.07408	0.0420247	0.0699829	0.282785	0.837752	6214329	promoter-TSS (ENSSSCT00000014215)	-825	ENSSSCT00000014215	TM7SF2	Delta14-sterol reductase
chr2	6586977	6586978	1	0.5714	1	0.9574	1	0.5	ENSSSCG00000013024	-0.172462	0.0963547	NRXN2	39.4618	26.6509	0.566274	7.87e-21	two	9301880	0.237771	0.410232	-0.172462	0.0963547	-1.78986	0.0746312	0.0613817	0.073476	0.509778	6586978	promoter-TSS (ENSSSCT00000014237)	-454	ENSSSCT00000014237	NRXN2	neurexin
chr2	6586994	6586995	0.75	0.1818	0.7895	0.8947	0.7333	0.4	ENSSSCG00000013024	-0.172462	0.216148	NRXN2	39.4618	26.6509	0.566274	7.87e-21	two	9301881	0.237771	0.410232	-0.172462	0.216148	-0.797886	0.0895384	0.0583546	0.424937	0.9151	6586995	promoter-TSS (ENSSSCT00000014237)	-437	ENSSSCT00000014237	NRXN2	neurexin
chr2	6587004	6587005	0.6875	0.4545	0.7619	0.9464	1	0.4	ENSSSCG00000013024	-0.172462	0.0966355	NRXN2	39.4618	26.6509	0.566274	7.87e-21	two	9301882	0.237771	0.410232	-0.172462	0.0966355	-1.78466	0.0746312	0.0583546	0.074316	0.512499	6587005	promoter-TSS (ENSSSCT00000014237)	-427	ENSSSCT00000014237	NRXN2	neurexin
chr2	6587007	6587008	0.8182	0.2	1	0.7115	0.8333	0.1	ENSSSCG00000013024	-0.172462	0.0919542	NRXN2	39.4618	26.6509	0.566274	7.87e-21	two	9301883	0.237771	0.410232	-0.172462	0.0919542	-1.87552	0.0746312	0.106189	0.0607217	0.465471	6587008	promoter-TSS (ENSSSCT00000014237)	-424	ENSSSCT00000014237	NRXN2	neurexin
chr2	8472613	8472614	0.875	1	0.8095	0.9074	0	0.2727	ENSSSCG00000022685	-0.127684	0.0600424	ROM1	1.21849	0.596745	1.0299	0.0171039	two	9324076	0.193065	0.32075	-0.127684	0.0600424	-2.12657	0.116508	0.0428107	0.0334559	0.341918	8472614	promoter-TSS (ENSSSCT00000014277)	189	ENSSSCT00000029011	ROM1
chr2	87432701	87432702	0.4737	0.8235	0.8182	0.9744	0	1	ENSSSCG00000014093	-0.151237	0.115638	CRHBP	13.4949	9.02939	0.579713	0.000245319	two	9902209	0.735121	0.886358	-0.151237	0.115638	-1.30785	0.0538656	0.0500005	0.190925	0.746551	87432702	promoter-TSS (ENSSSCT00000015394)	-804	ENSSSCT00000015394	CRHBP
chr2	87433117	87433118	0.92	0.6	1	1	0.8571	0.4286	ENSSSCG00000014093	-0.174019	0.161045	CRHBP	13.4949	9.02939	0.579713	0.000245319	two	9902210	0.521249	0.695268	-0.174019	0.161045	-1.08056	0.0612571	0.067425	0.279891	0.83548	87433118	promoter-TSS (ENSSSCT00000015394)	-388	ENSSSCT00000015394	CRHBP
chr2	87433289	87433290	0.7778	0.8462	0.6154	0.9211	0	0.8333	ENSSSCG00000014093	-0.15404	0.0649788	CRHBP	13.4949	9.02939	0.579713	0.000245319	two	9902211	0.528568	0.682608	-0.15404	0.0649788	-2.37062	0.0746312	0.0708645	0.0177583	0.238136	87433290	promoter-TSS (ENSSSCT00000015394)	-216	ENSSSCT00000015394	CRHBP
chr2	9332564	9332565	1	0.66	0.5806	1	0	0.4545	ENSSSCG00000013078	-0.193884	0.10669	MYRF	39.6209	14.6558	1.43479	2.64e-82	two	9334753	0.390569	0.584453	-0.193884	0.10669	-1.81726	0.0595626	0.0600558	0.0691767	0.495556	9332565	promoter-TSS (ENSSSCT00000014296)	-439	ENSSSCT00000014296	MYRF
chr2	9332569	9332570	0.6818	0.6667	0.6562	0.8077	0.8333	0.8	ENSSSCG00000013078	-0.193884	0.103281	MYRF	39.6209	14.6558	1.43479	2.64e-82	two	9334754	0.390569	0.584453	-0.193884	0.103281	-1.87725	0.0825861	0.0853912	0.0604841	0.464568	9332570	promoter-TSS (ENSSSCT00000014296)	-444	ENSSSCT00000014296	MYRF
chr2	9332581	9332582	0.5455	0.7442	0.9091	1	0.8182	0.4	ENSSSCG00000013078	-0.193884	0.106606	MYRF	39.6209	14.6558	1.43479	2.64e-82	two	9334755	0.390569	0.584453	-0.193884	0.106606	-1.8187	0.0597754	0.0642163	0.0689573	0.494815	9332582	promoter-TSS (ENSSSCT00000014296)	-456	ENSSSCT00000014296	MYRF
chr2	9332583	9332584	0.7619	0.6923	0.7857	0.8	0.7	0.5	ENSSSCG00000013078	-0.193884	0.108522	MYRF	39.6209	14.6558	1.43479	2.64e-82	two	9334756	0.390569	0.584453	-0.193884	0.108522	-1.78658	0.060994	0.26111	0.0740046	0.511483	9332584	promoter-TSS (ENSSSCT00000014296)	-458	ENSSSCT00000014296	MYRF
chr2	9332597	9332598	0.3571	0.5897	0.8611	0.8947	0.1818	0.7273	ENSSSCG00000013078	-0.193884	0.121979	MYRF	39.6209	14.6558	1.43479	2.64e-82	two	9334757	0.390569	0.584453	-0.193884	0.121979	-1.58948	0.0601064	0.0818505	0.111951	0.612779	9332598	promoter-TSS (ENSSSCT00000014296)	-472	ENSSSCT00000014296	MYRF
chr2	93782369	93782370	0.9167	0.8696	1	0.75	0.9	0.6	ENSSSCG00000014136	-0.193476	0.117555	VCAN	44.2211	23.5308	0.910183	8.31e-73	two	9949332	0.394008	0.587483	-0.193476	0.117555	-1.64583	0.159447	0.0438022	0.0997988	0.584143	93782370	promoter-TSS (ENSSSCT00000028327)	-672	ENSSSCT00000031327	VCAN	versican core protein
chr3	117103194	117103195	0.8	0.9	0.8462	0.8261	0.7273	1	ENSSSCG00000008534	-0.134529	0.0961334	FAM179A	0.120798	0.0110746	3.44727	0.0117218	two	11440332	0.774592	0.90912	-0.134529	0.0961334	-1.3994	0.0617393	0.0851458	0.161694	0.705503	117103195	promoter-TSS (ENSSSCT00000009338)	-904	ENSSSCT00000009338	FAM179A
chr3	117103230	117103231	0.5926	1	1	0.913	0.8571	0.8462	ENSSSCG00000008534	-0.134529	0.0946915	FAM179A	0.120798	0.0110746	3.44727	0.0117218	two	11440334	0.774592	0.90912	-0.134529	0.0946915	-1.42071	0.117274	0.063936	0.155402	0.695569	117103231	promoter-TSS (ENSSSCT00000009338)	-940	ENSSSCT00000009338	FAM179A
chr3	117103250	117103251	0.84	0.6364	0.8333	0.7692	0.5	1	ENSSSCG00000008534	-0.134529	0.0550498	FAM179A	0.120798	0.0110746	3.44727	0.0117218	two	11440335	0.774592	0.90912	-0.134529	0.0550498	-2.44377	0.0746312	0.110607	0.0145348	0.211059	117103251	promoter-TSS (ENSSSCT00000009338)	-960	ENSSSCT00000009338	FAM179A
chr3	117103265	117103266	0.9091	0.8182	1	0.9048	1	0.8	ENSSSCG00000008534	-0.134529	0.0593388	FAM179A	0.120798	0.0110746	3.44727	0.0117218	two	11440336	0.774592	0.90912	-0.134529	0.0593388	-2.26713	0.0746312	0.0498382	0.0233823	0.279754	117103266	promoter-TSS (ENSSSCT00000009338)	-975	ENSSSCT00000009338	FAM179A
chr3	125749079	125749080	1	0.6098	0	1	1	0.3	ENSSSCG00000008598	-0.151979	0.0727225	RHOB	120.543	73.0534	0.722527	9.64e-38	two	11514583	0.327709	0.479688	-0.151979	0.0727225	-2.08985	0.0746312	0.0662389	0.0366311	0.35917	125749080	promoter-TSS (ENSSSCT00000009409)	-837	ENSSSCT00000009409	RHOB
chr3	26061966	26061967	0.8333	0.9231	1	1	0.6	0.9444	ENSSSCG00000007857	-0.166854	0.0852814	ACSM3	1.24764	0.495509	1.33222	2.58e-05	two	10733308	0.706911	0.873765	-0.166854	0.0852814	-1.95651	0.054011	0.0486281	0.050405	0.424302	26061967	promoter-TSS (ENSSSCT00000008608)	-324	ENSSSCT00000008608	ACSM3	medium-chain acyl-CoA synthetase
chr3	26062039	26062040	0.8571	0.7222	0.6	0.5	0.7143	1	ENSSSCG00000007857	-0.166854	0.0712263	ACSM3	1.24764	0.495509	1.33222	2.58e-05	two	10733309	0.706911	0.873765	-0.166854	0.0712263	-2.34259	0.0540508	0.241274	0.0191503	0.249033	26062040	promoter-TSS (ENSSSCT00000008608)	-397	ENSSSCT00000008608	ACSM3	medium-chain acyl-CoA synthetase
chr3	27005109	27005110	1	0.7143	0.5455	0.8182	0.9167	0.7	ENSSSCG00000007866	-0.126116	0.0900911	TMC7	47.1839	11.2374	2.06998	1.16e-204	two	10743886	0.589919	0.716036	-0.126116	0.0900911	-1.39987	0.0642053	0.0525442	0.161551	0.70528	27005110	promoter-TSS (ENSSSCT00000008620)	-767	ENSSSCT00000008620	TMC7
chr3	27005134	27005135	1	0.8125	1	0.975	0.8636	0.5714	ENSSSCG00000007866	-0.126116	0.0950253	TMC7	47.1839	11.2374	2.06998	1.16e-204	two	10743887	0.589919	0.716036	-0.126116	0.0950253	-1.32719	0.0736424	0.0538578	0.184447	0.738011	27005135	promoter-TSS (ENSSSCT00000008620)	-792	ENSSSCT00000008620	TMC7
chr3	27005155	27005156	0.8333	0.5625	0.8333	0.9571	0.9048	0.6667	ENSSSCG00000007866	-0.126116	0.0875143	TMC7	47.1839	11.2374	2.06998	1.16e-204	two	10743888	0.589919	0.716036	-0.126116	0.0875143	-1.44109	0.0588561	0.0555288	0.149559	0.685996	27005156	promoter-TSS (ENSSSCT00000008620)	-813	ENSSSCT00000008620	TMC7
chr3	27005184	27005185	0.8621	0.5556	0.8462	1	0.4286	0.6842	ENSSSCG00000007866	-0.134125	0.107933	TMC7	47.1839	11.2374	2.06998	1.16e-204	two	10743889	0.510118	0.644242	-0.134125	0.107933	-1.24266	0.0576838	0.0435515	0.213993	0.774292	27005185	promoter-TSS (ENSSSCT00000008620)	-842	ENSSSCT00000008620	TMC7
chr3	32329653	32329654	0.7419	0.7	0.6923	0.9048	0.25	0.9231	ENSSSCG00000024982	-0.134774	0.0859699	LITAF	14.5989	10.304	0.50266	7.18e-11	two	10802242	0.686248	0.821022	-0.134774	0.0859699	-1.56768	0.0724681	0.0590595	0.116955	0.623801	32329654	promoter-TSS (ENSSSCT00000025103)	83	ENSSSCT00000025103	LITAF	lipopolysaccharide-induced tumor necrosis factor-alpha factor
chr3	32329675	32329676	1	0.1667	0.6176	1	0.25	1	ENSSSCG00000024982	-0.14333	0.0482835	LITAF	14.5989	10.304	0.50266	7.18e-11	two	10802243	0.637107	0.780437	-0.14333	0.0482835	-2.96852	0.264956	0.171061	0.00299237	0.0753367	32329676	promoter-TSS (ENSSSCT00000025103)	61	ENSSSCT00000025103	LITAF	lipopolysaccharide-induced tumor necrosis factor-alpha factor
chr3	32329681	32329682	1	0.3333	1	1	0.4615	1	ENSSSCG00000024982	-0.14333	0.0454785	LITAF	14.5989	10.304	0.50266	7.18e-11	two	10802244	0.637107	0.780437	-0.14333	0.0454785	-3.15161	0.840319	0.181971	0.00162374	0.0491484	32329682	promoter-TSS (ENSSSCT00000025103)	55	ENSSSCT00000025103	LITAF	lipopolysaccharide-induced tumor necrosis factor-alpha factor
chr3	32329693	32329694	0.8723	0	1	1	0.4167	1	ENSSSCG00000024982	-0.14333	0.0537791	LITAF	14.5989	10.304	0.50266	7.18e-11	two	10802245	0.637107	0.780437	-0.14333	0.0537791	-2.66517	0.123426	0.181971	0.00769497	0.141596	32329694	promoter-TSS (ENSSSCT00000025103)	43	ENSSSCT00000025103	LITAF	lipopolysaccharide-induced tumor necrosis factor-alpha factor
chr3	32329707	32329708	0.9038	0	0.9167	0.9643	0	1	ENSSSCG00000024982	-0.174675	0.0359965	LITAF	14.5989	10.304	0.50266	7.18e-11	two	10802246	0.592368	0.767042	-0.174675	0.0359965	-4.85255	0.0746312	0.379695	1.22e-06	0.000181891	32329708	promoter-TSS (ENSSSCT00000025103)	29	ENSSSCT00000025103	LITAF	lipopolysaccharide-induced tumor necrosis factor-alpha factor
chr3	32329711	32329712	0.8	0	1	0.9231	0.2308	1	ENSSSCG00000024982	-0.174675	0.0359965	LITAF	14.5989	10.304	0.50266	7.18e-11	two	10802247	0.592368	0.767042	-0.174675	0.0359965	-4.85255	0.0746312	0.379695	1.22e-06	0.000181891	32329712	promoter-TSS (ENSSSCT00000025103)	25	ENSSSCT00000025103	LITAF	lipopolysaccharide-induced tumor necrosis factor-alpha factor
chr3	32329749	32329750	0.9545	0	1	1	0.3636	0.9333	ENSSSCG00000024982	-0.174675	0.0555045	LITAF	14.5989	10.304	0.50266	7.18e-11	two	10802248	0.592368	0.767042	-0.174675	0.0555045	-3.14704	0.0888363	0.0916992	0.00164933	0.0496918	32329750	promoter-TSS (ENSSSCT00000025103)	-13	ENSSSCT00000025103	LITAF	lipopolysaccharide-induced tumor necrosis factor-alpha factor
chr3	32329824	32329825	1	0	0.3	1	1	0.6364	ENSSSCG00000024982	-0.189681	0.0789451	LITAF	14.5989	10.304	0.50266	7.18e-11	two	10802250	0.577352	0.767032	-0.189681	0.0789451	-2.40269	0.223847	0.0782217	0.016275	0.225989	32329825	promoter-TSS (ENSSSCT00000025103)	-88	ENSSSCT00000025103	LITAF	lipopolysaccharide-induced tumor necrosis factor-alpha factor
chr3	32329889	32329890	1	0	0.6	1	1	0.6429	ENSSSCG00000024982	-0.199177	0.0969355	LITAF	14.5989	10.304	0.50266	7.18e-11	two	10802251	0.512704	0.711881	-0.199177	0.0969355	-2.05474	0.123878	0.0734092	0.0399043	0.375954	32329890	promoter-TSS (ENSSSCT00000025103)	-153	ENSSSCT00000025103	LITAF	lipopolysaccharide-induced tumor necrosis factor-alpha factor
chr3	32329910	32329911	1	0	0.5385	1	0.8182	0.3125	ENSSSCG00000024982	-0.165692	0.08138	LITAF	14.5989	10.304	0.50266	7.18e-11	two	10802252	0.428198	0.59389	-0.165692	0.08138	-2.03602	0.0578349	0.104202	0.0417478	0.385004	32329911	promoter-TSS (ENSSSCT00000025103)	-174	ENSSSCT00000025103	LITAF	lipopolysaccharide-induced tumor necrosis factor-alpha factor
chr3	32329918	32329919	0.6667	0	0.375	1	0.3846	0	ENSSSCG00000024982	-0.165692	0.067855	LITAF	14.5989	10.304	0.50266	7.18e-11	two	10802253	0.428198	0.59389	-0.165692	0.067855	-2.44185	0.145099	0.429075	0.0146123	0.211737	32329919	promoter-TSS (ENSSSCT00000025103)	-182	ENSSSCT00000025103	LITAF	lipopolysaccharide-induced tumor necrosis factor-alpha factor
chr3	32329948	32329949	0.4706	0	0.6923	1	1	0.6	ENSSSCG00000024982	-0.157527	0.0710189	LITAF	14.5989	10.304	0.50266	7.18e-11	two	10802254	0.294354	0.451881	-0.157527	0.0710189	-2.2181	0.0535043	0.0834018	0.0265482	0.300712	32329949	promoter-TSS (ENSSSCT00000025103)	-212	ENSSSCT00000025103	LITAF	lipopolysaccharide-induced tumor necrosis factor-alpha factor
chr3	32356730	32356731	1	1	0.6364	1	0.575	0.875	ENSSSCG00000024982	-0.105402	0.062239	LITAF	14.5989	10.304	0.50266	7.18e-11	two	10802902	0.684782	0.790184	-0.105402	0.062239	-1.69351	0.0871001	0.0521827	0.090358	0.559655	32356731	promoter-TSS (ENSSSCT00000036552)	-803	ENSSSCT00000036552	LITAF	lipopolysaccharide-induced tumor necrosis factor-alpha factor
chr3	32356741	32356742	0.6923	0	0.8235	1	0.75	0.8667	ENSSSCG00000024982	-0.105402	0.0617717	LITAF	14.5989	10.304	0.50266	7.18e-11	two	10802903	0.684782	0.790184	-0.105402	0.0617717	-1.70632	0.0754534	0.0514814	0.087948	0.553019	32356742	promoter-TSS (ENSSSCT00000036552)	-814	ENSSSCT00000036552	LITAF	lipopolysaccharide-induced tumor necrosis factor-alpha factor
chr3	32356754	32356755	0.8	0.9048	0.5789	1	0.65	1	ENSSSCG00000024982	-0.105402	0.0533399	LITAF	14.5989	10.304	0.50266	7.18e-11	two	10802904	0.684782	0.790184	-0.105402	0.0533399	-1.97605	0.0738982	0.119389	0.0481487	0.414507	32356755	promoter-TSS (ENSSSCT00000036552)	-827	ENSSSCT00000036552	LITAF	lipopolysaccharide-induced tumor necrosis factor-alpha factor
chr3	40485097	40485098	0.9756	0	0	0.8646	0.9091	0.8	ENSSSCG00000026248	-0.21521	0.105489	PAQR4	3.51269	1.62829	1.10922	1.71e-08	two	10899366	0.501717	0.716927	-0.21521	0.105489	-2.04012	0.147514	0.0570941	0.0413383	0.383017	40485098	promoter-TSS (ENSSSCT00000022821)	-719	ENSSSCT00000022821	PAQR4
chr3	40485157	40485158	0.8636	0	0	0.8852	0.8462	0.3529	ENSSSCG00000026248	-0.21521	0.105165	PAQR4	3.51269	1.62829	1.10922	1.71e-08	two	10899367	0.501717	0.716927	-0.21521	0.105165	-2.0464	0.13669	0.218271	0.0407173	0.379985	40485158	promoter-TSS (ENSSSCT00000022821)	-659	ENSSSCT00000022821	PAQR4
chr3	40485215	40485216	0.3529	0.8	0.75	0.8582	1	0.4286	ENSSSCG00000026248	-0.21521	0.0533491	PAQR4	3.51269	1.62829	1.10922	1.71e-08	two	10899368	0.501717	0.716927	-0.21521	0.0533491	-4.03399	0.0746312	0.184966	5.48e-05	0.00388818	40485216	promoter-TSS (ENSSSCT00000022821)	-601	ENSSSCT00000022821	PAQR4
chr3	40485216	40485217	0.9583	0.3333	0	0.7885	0.875	0.8462	ENSSSCG00000026248	-0.21521	0.101729	PAQR4	3.51269	1.62829	1.10922	1.71e-08	two	10899369	0.501717	0.716927	-0.21521	0.101729	-2.11552	0.0578909	0.0724199	0.0343855	0.347068	40485217	promoter-TSS (ENSSSCT00000022821)	-600	ENSSSCT00000022821	PAQR4
chr3	40485240	40485241	0.44	1	1	0.8667	0.6667	0.4444	ENSSSCG00000026248	-0.21521	0.0630446	PAQR4	3.51269	1.62829	1.10922	1.71e-08	two	10899370	0.501717	0.716927	-0.21521	0.0630446	-3.41361	0.0746312	0.12436	0.000641078	0.0251499	40485241	promoter-TSS (ENSSSCT00000022821)	-576	ENSSSCT00000022821	PAQR4
chr3	40485241	40485242	1	0.1538	0	0.7797	1	0.8182	ENSSSCG00000026248	-0.21521	0.057122	PAQR4	3.51269	1.62829	1.10922	1.71e-08	two	10899371	0.501717	0.716927	-0.21521	0.057122	-3.76755	0.402352	0.0689517	0.000164857	0.00909454	40485242	promoter-TSS (ENSSSCT00000022821)	-575	ENSSSCT00000022821	PAQR4
chr3	40485248	40485249	0.5	0.6	0.8571	0.5972	0.2667	0.7778	ENSSSCG00000026248	-0.21521	0.0727741	PAQR4	3.51269	1.62829	1.10922	1.71e-08	two	10899372	0.501717	0.716927	-0.21521	0.0727741	-2.95723	0.0746312	0.0633414	0.00310415	0.0772556	40485249	promoter-TSS (ENSSSCT00000022821)	-568	ENSSSCT00000022821	PAQR4
chr3	40485295	40485296	0.6	1	0.8571	0.9483	0.3571	0.8571	ENSSSCG00000026248	-0.21521	0.0672204	PAQR4	3.51269	1.62829	1.10922	1.71e-08	two	10899373	0.501717	0.716927	-0.21521	0.0672204	-3.20156	0.0746312	0.0791321	0.00136688	0.0434999	40485296	promoter-TSS (ENSSSCT00000022821)	-521	ENSSSCT00000022821	PAQR4
chr3	42659099	42659100	1	0.8333	0.8667	0.8947	0.9667	0.04	ENSSSCG00000026326	-0.152827	0.0362394	CCNF	1.91439	1.20462	0.668304	0.000892446	two	10953426	0.24804	0.400867	-0.152827	0.0362394	-4.21714	0.367409	0.637075	2.47e-05	0.00207776	42659100	promoter-TSS (ENSSSCT00000028270)	-672	ENSSSCT00000028270	CCNF
chr3	42659162	42659163	1	0.8571	1	0.8148	0.9429	0.5833	ENSSSCG00000026326	-0.142378	0.0814872	CCNF	1.91439	1.20462	0.668304	0.000892446	two	10953427	0.300151	0.442528	-0.142378	0.0814872	-1.74724	0.0396185	0.0499813	0.0805958	0.531873	42659163	promoter-TSS (ENSSSCT00000028270)	-735	ENSSSCT00000028270	CCNF
chr3	42659174	42659175	0.6	1	1	1	1	0.5882	ENSSSCG00000026326	-0.146342	0.0823081	CCNF	1.91439	1.20462	0.668304	0.000892446	two	10953428	0.305586	0.451928	-0.146342	0.0823081	-1.77798	0.0490124	0.051324	0.0754072	0.515969	42659175	promoter-TSS (ENSSSCT00000028270)	-747	ENSSSCT00000028270	CCNF
chr3	42659178	42659179	0.9	0	0.8	0.875	1	0.7419	ENSSSCG00000026326	-0.146342	0.0751705	CCNF	1.91439	1.20462	0.668304	0.000892446	two	10953429	0.305586	0.451928	-0.146342	0.0751705	-1.9468	0.0416388	0.096806	0.0515585	0.429181	42659179	promoter-TSS (ENSSSCT00000028270)	-751	ENSSSCT00000028270	CCNF
chr3	55096120	55096121	0.8333	1	1	0.8462	0.7857	0.2632	ENSSSCG00000008164	-0.115473	0.0898635	MAP4K4	151.555	75.3038	1.00904	4.84e-93	two	11052560	0.262431	0.377904	-0.115473	0.0898635	-1.28498	0.135011	0.0642292	0.198799	0.756469	55096121	promoter-TSS (ENSSSCT00000008941)	-387	ENSSSCT00000008941	MAP4K4
chr3	55096125	55096126	0.9535	1	0.3846	0.92	0.9167	0.2222	ENSSSCG00000008164	-0.103074	0.096468	MAP4K4	151.555	75.3038	1.00904	4.84e-93	two	11052561	0.270004	0.373078	-0.103074	0.096468	-1.06848	0.0594473	0.0567757	0.285305	0.839652	55096126	promoter-TSS (ENSSSCT00000008941)	-392	ENSSSCT00000008941	MAP4K4
chr4	102662188	102662189	0.9286	0.9444	0.9737	0.8333	0.5455	0.3846	ENSSSCG00000006496	-0.105901	0.162079	LMNA	12.2897	8.35998	0.555875	1.73e-06	two	12463530	0.26886	0.37476	-0.105901	0.162079	-0.653387	0.0648079	0.0563965	0.513507	0.943291	102662189	promoter-TSS (ENSSSCT00000007115)	-360	ENSSSCT00000007115	LMNA	lamin A/C
chr4	103633326	103633327	0.8889	0.8889	0.8333	1	1	0.7273	ENSSSCG00000006535	-0.167796	0.119295	PMVK	10.8695	5.57677	0.962782	3.87e-11	two	12475225	0.640112	0.807908	-0.167796	0.119295	-1.40656	0.059837	0.0524856	0.159557	0.70216	103633327	promoter-TSS (ENSSSCT00000007157)	-926	ENSSSCT00000007157	PMVK	phosphomevalonate kinase
chr4	103633332	103633333	0.8056	0.7692	0.8182	0.7273	1	1	ENSSSCG00000006535	-0.167796	0.110215	PMVK	10.8695	5.57677	0.962782	3.87e-11	two	12475226	0.640112	0.807908	-0.167796	0.110215	-1.52243	0.0590504	0.113266	0.1279	0.646455	103633333	promoter-TSS (ENSSSCT00000007157)	-920	ENSSSCT00000007157	PMVK	phosphomevalonate kinase
chr4	111564490	111564491	0.8667	0.7273	1	0.6	1	0.7143	ENSSSCG00000006719	-0.121293	0.0699956	HSD3B1	0.457549	0.266437	0.780134	0.0396595	two	12541264	0.715366	0.836659	-0.121293	0.0699956	-1.73287	0.167146	0.0513581	0.0831187	0.53932	111564491	promoter-TSS (ENSSSCT00000036672)	-299	ENSSSCT00000007360	HSD3B	3beta-hydroxy-delta5-steroid dehydrogenase / steroid delta-isomerase
chr4	111564496	111564497	0.871	0.9286	1	0.8	1	0.875	ENSSSCG00000006719	-0.121293	0.0746506	HSD3B1	0.457549	0.266437	0.780134	0.0396595	two	12541266	0.715366	0.836659	-0.121293	0.0746506	-1.62481	0.154945	0.0568224	0.104203	0.594854	111564497	promoter-TSS (ENSSSCT00000036672)	-305	ENSSSCT00000007360	HSD3B	3beta-hydroxy-delta5-steroid dehydrogenase / steroid delta-isomerase
chr4	439646	439647	0.875	0.5946	0.8571	0.4	0.6364	0.2857	ENSSSCG00000025116	-0.11724	0.171521	TONSL	0.785222	0.319837	1.29576	4.69e-05	two	11697444	0.535439	0.652679	-0.11724	0.171521	-0.683532	0.10543	0.159176	0.494271	0.937989	439647	promoter-TSS (ENSSSCT00000029149)	-944	ENSSSCT00000029149	TONSL
chr4	79152819	79152820	1	0.7692	0.3929	1	1	1	ENSSSCG00000006231	-0.117607	0.043048	CHD7	17.7628	9.61598	0.885354	3.85e-44	two	12276772	0.603561	0.721168	-0.117607	0.043048	-2.73201	0.931987	0.79446	0.00629501	0.124255	79152820	promoter-TSS (ENSSSCT00000006828)	-262	ENSSSCT00000006828	CHD7
chr4	98754301	98754302	0.8788	1	1	1	0.9524	0.8	ENSSSCG00000021186	-0.196673	0.167831	CRP	0.379161	0.0455368	3.05771	0.000141305	two	12435055	0.649208	0.845881	-0.196673	0.167831	-1.17185	0.0715367	0.0483505	0.241255	0.802444	98754302	promoter-TSS (ENSSSCT00000029314)	-76	ENSSSCT00000029314	CRP
chr5	100819476	100819477	1	0.6667	1	0.5625	0.8462	0.6154	ENSSSCG00000000931	-0.145519	0.118199	MGAT4C	11.2242	7.27471	0.625647	1.03e-10	two	13586940	0.603497	0.749016	-0.145519	0.118199	-1.23114	0.127162	0.0504672	0.218272	0.779035	100819477	promoter-TSS (ENSSSCT00000001016)	-639	ENSSSCT00000001016	MGAT4C	alpha-1,3-mannosylglycoprotein beta-1,4-N-acetylglucosaminyltransferase C
chr5	100819477	100819478	1	0	1	0.8	1	0.7	ENSSSCG00000000931	-0.145519	0.0437941	MGAT4C	11.2242	7.27471	0.625647	1.03e-10	two	13586941	0.603497	0.749016	-0.145519	0.0437941	-3.32279	0.0746312	0.0590525	0.00089121	0.0319947	100819478	promoter-TSS (ENSSSCT00000001016)	-638	ENSSSCT00000001016	MGAT4C	alpha-1,3-mannosylglycoprotein beta-1,4-N-acetylglucosaminyltransferase C
chr5	100819541	100819542	1	0.8667	1	0.3913	1	0.8	ENSSSCG00000000931	-0.110361	0.0963602	MGAT4C	11.2242	7.27471	0.625647	1.03e-10	two	13586942	0.694167	0.804527	-0.110361	0.0963602	-1.14529	0.0560476	0.0565604	0.252088	0.812377	100819542	promoter-TSS (ENSSSCT00000001016)	-574	ENSSSCT00000001016	MGAT4C	alpha-1,3-mannosylglycoprotein beta-1,4-N-acetylglucosaminyltransferase C
chr5	100819680	100819681	0.9231	1	1	0.6364	0.8889	0.7955	ENSSSCG00000000931	-0.12062	0.0813408	MGAT4C	11.2242	7.27471	0.625647	1.03e-10	two	13586943	0.679812	0.800432	-0.12062	0.0813408	-1.4829	0.727394	0.163002	0.1381	0.665894	100819681	promoter-TSS (ENSSSCT00000001016)	-435	ENSSSCT00000001016	MGAT4C	alpha-1,3-mannosylglycoprotein beta-1,4-N-acetylglucosaminyltransferase C
chr5	100819701	100819702	0.9211	1	1	0.9	1	0.9608	ENSSSCG00000000931	-0.130337	0.074294	MGAT4C	11.2242	7.27471	0.625647	1.03e-10	two	13586944	0.665565	0.795902	-0.130337	0.074294	-1.75434	0.746559	0.53288	0.0793715	0.528196	100819702	promoter-TSS (ENSSSCT00000001016)	-414	ENSSSCT00000001016	MGAT4C	alpha-1,3-mannosylglycoprotein beta-1,4-N-acetylglucosaminyltransferase C
chr5	100819750	100819751	0.7093	1	1	1	1	0.8302	ENSSSCG00000000931	-0.160791	0.127441	MGAT4C	11.2242	7.27471	0.625647	1.03e-10	two	13586945	0.65645	0.817241	-0.160791	0.127441	-1.26169	0.265054	0.0350146	0.20706	0.766378	100819751	promoter-TSS (ENSSSCT00000001016)	-365	ENSSSCT00000001016	MGAT4C	alpha-1,3-mannosylglycoprotein beta-1,4-N-acetylglucosaminyltransferase C
chr5	100819791	100819792	0.9167	0.9231	1	0.6531	0.9048	0.9062	ENSSSCG00000000931	-0.160791	0.0882214	MGAT4C	11.2242	7.27471	0.625647	1.03e-10	two	13586946	0.65645	0.817241	-0.160791	0.0882214	-1.82259	0.622887	0.0888247	0.0683655	0.492818	100819792	promoter-TSS (ENSSSCT00000001016)	-324	ENSSSCT00000001016	MGAT4C	alpha-1,3-mannosylglycoprotein beta-1,4-N-acetylglucosaminyltransferase C
chr5	17064762	17064763	1	0.9167	0	0.6842	1	0.5	ENSSSCG00000029196	-0.268362	0.140206	DIP2B	80.4638	50.9182	0.660159	1.57e-43	two	13021623	0.348776	0.617138	-0.268362	0.140206	-1.91406	0.0511566	0.170254	0.0556125	0.4457	17064763	promoter-TSS (ENSSSCT00000028346)	-33	ENSSSCT00000028346	DIP2B
chr5	70264064	70264065	0.7778	0.9412	0.875	0.9048	0.5	0	ENSSSCG00000000753	-0.112006	0.0486588	WNK1	111.568	62.0242	0.847021	8.39e-74	two	13361119	0.0758742	0.18788	-0.112006	0.0486588	-2.30186	0.0822086	0.101104	0.0213431	0.265383	70264065	promoter-TSS (ENSSSCT00000000817)	-341	ENSSSCT00000000817	WNK1
chr5	70264066	70264067	0.9	0.9583	1	0.9348	0.8333	0	ENSSSCG00000000753	-0.112006	0.0486588	WNK1	111.568	62.0242	0.847021	8.39e-74	two	13361120	0.0758742	0.18788	-0.112006	0.0486588	-2.30186	0.0822086	0.101104	0.0213431	0.265383	70264067	promoter-TSS (ENSSSCT00000000817)	-339	ENSSSCT00000000817	WNK1
chr5	70264068	70264069	1	0.7812	0.913	0.8846	1	0	ENSSSCG00000000753	-0.112006	0.0487482	WNK1	111.568	62.0242	0.847021	8.39e-74	two	13361121	0.0758742	0.18788	-0.112006	0.0487482	-2.29764	0.0832538	0.101104	0.0215824	0.267104	70264069	promoter-TSS (ENSSSCT00000000817)	-337	ENSSSCT00000000817	WNK1
chr5	70264077	70264078	0.8333	0.9394	0.9	0.88	0.8824	0	ENSSSCG00000000753	-0.112006	0.0493285	WNK1	111.568	62.0242	0.847021	8.39e-74	two	13361122	0.0758742	0.18788	-0.112006	0.0493285	-2.27061	0.0832538	0.104472	0.0231707	0.278296	70264078	promoter-TSS (ENSSSCT00000000817)	-328	ENSSSCT00000000817	WNK1
chr5	70264095	70264096	0.8667	0.9355	1	0.6296	0.2	0	ENSSSCG00000000753	-0.120709	0.0541655	WNK1	111.568	62.0242	0.847021	8.39e-74	two	13361123	0.0732864	0.193995	-0.120709	0.0541655	-2.22852	0.0869733	0.111441	0.0258457	0.296226	70264096	promoter-TSS (ENSSSCT00000000817)	-310	ENSSSCT00000000817	WNK1
chr5	70264099	70264100	0.8333	0.8667	1	0.6111	1	0	ENSSSCG00000000753	-0.120709	0.0655218	WNK1	111.568	62.0242	0.847021	8.39e-74	two	13361124	0.0732864	0.193995	-0.120709	0.0655218	-1.84227	0.0909698	0.155941	0.0654354	0.482656	70264100	promoter-TSS (ENSSSCT00000000817)	-306	ENSSSCT00000000817	WNK1
chr5	70264103	70264104	1	0.8387	1	0.7895	1	0	ENSSSCG00000000753	-0.120709	0.0546841	WNK1	111.568	62.0242	0.847021	8.39e-74	two	13361125	0.0732864	0.193995	-0.120709	0.0546841	-2.20739	0.0919418	0.114769	0.027287	0.305397	70264104	promoter-TSS (ENSSSCT00000000817)	-302	ENSSSCT00000000817	WNK1
chr5	70264110	70264111	0.9286	0.8182	0.9091	0.65	0.8	0	ENSSSCG00000000753	-0.120709	0.0655661	WNK1	111.568	62.0242	0.847021	8.39e-74	two	13361126	0.0732864	0.193995	-0.120709	0.0655661	-1.84103	0.0929003	0.164878	0.0656174	0.48329	70264111	promoter-TSS (ENSSSCT00000000817)	-295	ENSSSCT00000000817	WNK1
chr5	70264113	70264114	1	0.7778	1	0.8421	0.6	0	ENSSSCG00000000753	-0.120709	0.0655661	WNK1	111.568	62.0242	0.847021	8.39e-74	two	13361127	0.0732864	0.193995	-0.120709	0.0655661	-1.84103	0.0929003	0.164878	0.0656174	0.48329	70264114	promoter-TSS (ENSSSCT00000000817)	-292	ENSSSCT00000000817	WNK1
chr5	70264116	70264117	1	0.8235	0.8571	0.6667	0.5	0	ENSSSCG00000000753	-0.120709	0.0657204	WNK1	111.568	62.0242	0.847021	8.39e-74	two	13361128	0.0732864	0.193995	-0.120709	0.0657204	-1.83671	0.0938446	0.16594	0.0662533	0.4855	70264117	promoter-TSS (ENSSSCT00000000817)	-289	ENSSSCT00000000817	WNK1
chr5	70264130	70264131	0.8333	0.8125	1	0.6	0.6944	0	ENSSSCG00000000753	-0.120709	0.0656959	WNK1	111.568	62.0242	0.847021	8.39e-74	two	13361129	0.0732864	0.193995	-0.120709	0.0656959	-1.83739	0.0956884	0.151938	0.0661524	0.485141	70264131	promoter-TSS (ENSSSCT00000000817)	-275	ENSSSCT00000000817	WNK1
chr5	70264136	70264137	0.8	0.75	0.8889	0.52	0.6552	0	ENSSSCG00000000753	-0.120709	0.0658565	WNK1	111.568	62.0242	0.847021	8.39e-74	two	13361130	0.0732864	0.193995	-0.120709	0.0658565	-1.83291	0.0938446	0.148522	0.066816	0.487463	70264137	promoter-TSS (ENSSSCT00000000817)	-269	ENSSSCT00000000817	WNK1
chr5	70264146	70264147	0.8	0.9524	0.9474	0.4815	0.7412	0	ENSSSCG00000000753	-0.120709	0.0667516	WNK1	111.568	62.0242	0.847021	8.39e-74	two	13361131	0.0732864	0.193995	-0.120709	0.0667516	-1.80833	0.104759	0.148522	0.0705548	0.500229	70264147	promoter-TSS (ENSSSCT00000000817)	-259	ENSSSCT00000000817	WNK1
chr5	70264151	70264152	1	0.75	1	0.4444	0.7174	0.1333	ENSSSCG00000000753	-0.120709	0.0761825	WNK1	111.568	62.0242	0.847021	8.39e-74	two	13361132	0.0732864	0.193995	-0.120709	0.0761825	-1.58447	0.103766	0.0649603	0.113086	0.615309	70264152	promoter-TSS (ENSSSCT00000000817)	-254	ENSSSCT00000000817	WNK1
chr5	70264159	70264160	1	0.4576	1	0.4167	0.7812	0	ENSSSCG00000000753	-0.120709	0.0550885	WNK1	111.568	62.0242	0.847021	8.39e-74	two	13361133	0.0732864	0.193995	-0.120709	0.0550885	-2.19118	0.101936	0.108073	0.0284384	0.312557	70264160	promoter-TSS (ENSSSCT00000000817)	-246	ENSSSCT00000000817	WNK1
chr5	70264161	70264162	1	0.7308	1	0.6857	0.8	0	ENSSSCG00000000753	-0.120709	0.0551611	WNK1	111.568	62.0242	0.847021	8.39e-74	two	13361134	0.0732864	0.193995	-0.120709	0.0551611	-2.1883	0.103377	0.108073	0.0286478	0.313842	70264162	promoter-TSS (ENSSSCT00000000817)	-244	ENSSSCT00000000817	WNK1
chr5	72954617	72954618	0.8605	1	1	1	1	0.8	ENSSSCG00000000778	-0.148753	0.115348	CPNE8	4.35566	2.93465	0.569701	0.000105806	two	13383947	0.653986	0.802739	-0.148753	0.115348	-1.2896	0.0574793	0.0562441	0.197188	0.754452	72954618	promoter-TSS (ENSSSCT00000027279)	206	ENSSSCT00000000842	CPNE8
chr5	8555188	8555189	0.8929	0.5	0.8333	1	0.9	0	ENSSSCG00000000138	-0.107863	0.0982328	PVALB	77.6012	39.6802	0.967661	2.06e-36	two	12959805	0.240798	0.348661	-0.107863	0.0982328	-1.09804	0.0746312	0.228049	0.272187	0.829496	8555189	promoter-TSS (ENSSSCT00000032626)	-235	ENSSSCT00000032626	PVALB
chr5	8555195	8555196	0.5	0.8421	1	0.8667	1	0.0909	ENSSSCG00000000138	-0.107863	0.113436	PVALB	77.6012	39.6802	0.967661	2.06e-36	two	12959806	0.240798	0.348661	-0.107863	0.113436	-0.950873	0.0746312	0.081396	0.341669	0.876171	8555196	promoter-TSS (ENSSSCT00000032626)	-228	ENSSSCT00000032626	PVALB
chr5	8555251	8555252	0.7059	0.9394	0.8	0.7857	0.8571	0.4545	ENSSSCG00000000138	-0.107863	0.115516	PVALB	77.6012	39.6802	0.967661	2.06e-36	two	12959807	0.240798	0.348661	-0.107863	0.115516	-0.933752	0.0746312	0.0679899	0.350432	0.880999	8555252	promoter-TSS (ENSSSCT00000032626)	-172	ENSSSCT00000032626	PVALB
chr6	101050478	101050479	0.7778	1	0.7059	0.3	0.9	0.7692	ENSSSCG00000003707	-0.179637	0.0755492	NPC1	84.1703	34.9316	1.26878	9.86e-115	two	14755886	0.369891	0.549527	-0.179637	0.0755492	-2.37774	0.0603344	0.0870221	0.0174189	0.235392	101050479	promoter-TSS (ENSSSCT00000004106)	-970	ENSSSCT00000004106	NPC1	Niemann-Pick C1 protein
chr6	11916703	11916704	0.4	0.9	1	0.5652	0.6429	1	ENSSSCG00000002706	-0.269915	0.122284	ADAT1	4.13448	2.83772	0.542977	0.00333279	two	13864858	0.352861	0.622777	-0.269915	0.122284	-2.20728	0.249276	0.793289	0.0272942	0.305445	11916704	promoter-TSS (ENSSSCT00000003000)	-577	ENSSSCT00000003000	ADAT1
chr6	11916741	11916742	1	0.913	0.9	1	0	0.9091	ENSSSCG00000002706	-0.146053	0.0701059	ADAT1	4.13448	2.83772	0.542977	0.00333279	two	13864859	0.50792	0.653973	-0.146053	0.0701059	-2.08332	0.0746312	0.0915038	0.0372223	0.362254	11916742	promoter-TSS (ENSSSCT00000003000)	-539	ENSSSCT00000003000	ADAT1
chr6	11916749	11916750	1	0.75	0.5	1	0	0.6364	ENSSSCG00000002706	-0.146053	0.0728173	ADAT1	4.13448	2.83772	0.542977	0.00333279	two	13864861	0.50792	0.653973	-0.146053	0.0728173	-2.00574	0.0746312	0.0580079	0.0448836	0.399799	11916750	promoter-TSS (ENSSSCT00000003000)	-531	ENSSSCT00000003000	ADAT1
chr6	11916872	11916873	0.9333	0.45	0.1	1	0	0	ENSSSCG00000002706	-0.107003	0.14088	ADAT1	4.13448	2.83772	0.542977	0.00333279	two	13864863	0.383207	0.49021	-0.107003	0.14088	-0.75953	0.148309	0.173002	0.447535	0.923374	11916873	promoter-TSS (ENSSSCT00000003000)	-408	ENSSSCT00000003000	ADAT1
chr6	11916955	11916956	1	0.7143	1	1	0.8	0.5	ENSSSCG00000002706	-0.100217	0.116631	ADAT1	4.13448	2.83772	0.542977	0.00333279	two	13864865	0.288079	0.388297	-0.100217	0.116631	-0.85927	0.206086	0.306264	0.390192	0.900622	11916956	promoter-TSS (ENSSSCT00000003000)	-325	ENSSSCT00000003000	ADAT1
chr6	11916987	11916988	1	0.7143	0.9677	1	0.8571	0.6071	ENSSSCG00000002706	-0.100217	0.107051	ADAT1	4.13448	2.83772	0.542977	0.00333279	two	13864866	0.288079	0.388297	-0.100217	0.107051	-0.936168	0.336332	0.343842	0.349187	0.880312	11916988	promoter-TSS (ENSSSCT00000003000)	-293	ENSSSCT00000003000	ADAT1
chr6	124932159	124932160	0.9048	0.8621	1	1	0.6	0.6875	ENSSSCG00000003764	-0.159623	0.090223	PTGFR	2.47481	1.67406	0.563963	0.00190071	two	14883541	0.573457	0.733081	-0.159623	0.090223	-1.76921	0.0455513	0.0453523	0.076859	0.520496	124932160	promoter-TSS (ENSSSCT00000004166)	-662	ENSSSCT00000004166	FP	prostaglandin F receptor
chr6	124932164	124932165	0.7	0.9091	1	1	0.9	0.875	ENSSSCG00000003764	-0.159623	0.0818266	PTGFR	2.47481	1.67406	0.563963	0.00190071	two	14883543	0.573457	0.733081	-0.159623	0.0818266	-1.95075	0.0525004	0.0771324	0.0510867	0.4272	124932165	promoter-TSS (ENSSSCT00000004166)	-667	ENSSSCT00000004166	FP	prostaglandin F receptor
chr6	139965978	139965979	0.0833	0.9375	0.6923	1	0.8571	0.3333	ENSSSCG00000003825	-0.106073	0.0412091	CYP2J2	2.49967	0.61938	2.01284	1.65e-14	two	14986694	0.208788	0.314861	-0.106073	0.0412091	-2.57403	0.0485541	0.0586629	0.0100523	0.167956	139965979	promoter-TSS (ENSSSCT00000032807)	10	ENSSSCT00000004234	CYP2J2	cytochrome P450, family 2, subfamily J
chr6	139965990	139965991	0	0.6154	0.9231	0.95	1	0.1053	ENSSSCG00000003825	-0.101336	0.0548905	CYP2J2	2.49967	0.61938	2.01284	1.65e-14	two	14986695	0.233972	0.335308	-0.101336	0.0548905	-1.84615	0.0539643	0.123869	0.0648702	0.480649	139965991	promoter-TSS (ENSSSCT00000032807)	-2	ENSSSCT00000004234	CYP2J2	cytochrome P450, family 2, subfamily J
chr6	152364499	152364500	0.92	0	0.7778	0.4167	1	0.5	ENSSSCG00000003895	-0.229916	0.0572254	EFCAB14	32.2578	22.0861	0.546508	2.66e-14	two	15095154	0.195913	0.425828	-0.229916	0.0572254	-4.01772	0.0527352	0.149747	5.88e-05	0.00410385	152364500	promoter-TSS (ENSSSCT00000004309)	-590	ENSSSCT00000004309	EFCAB14
chr6	153252936	153252937	1	0	0.5833	1	0.9	0.3889	ENSSSCG00000003914	-0.205414	0.0796032	PRDX1	94.922	57.8715	0.713889	5.45e-26	two	15108563	0.518104	0.723518	-0.205414	0.0796032	-2.58048	0.284319	0.261536	0.00986644	0.165998	153252937	promoter-TSS (ENSSSCT00000004329)	-950	ENSSSCT00000004329	PRDX1	peroxiredoxin 1
chr6	153252993	153252994	0.25	0.1333	0.8421	1	0.6	0.4118	ENSSSCG00000003914	-0.201469	0.101564	PRDX1	94.922	57.8715	0.713889	5.45e-26	two	15108564	0.453603	0.655072	-0.201469	0.101564	-1.98366	0.0472673	0.0946017	0.0472943	0.410728	153252994	promoter-TSS (ENSSSCT00000004329)	-893	ENSSSCT00000004329	PRDX1	peroxiredoxin 1
chr6	18159724	18159725	0.8438	0.3333	0.9737	0.6316	0	0.7333	ENSSSCG00000028587	-0.151639	0.0669187	PRSS54	0.577043	0.146372	1.97904	0.0192187	two	13930393	0.551049	0.702688	-0.151639	0.0669187	-2.26602	0.0746312	0.11358	0.0234504	0.28022	18159725	promoter-TSS (ENSSSCT00000027270)	-494	ENSSSCT00000027270	PRSS54
chr6	18159733	18159734	0.8	0.7576	1	0.375	0	0.9333	ENSSSCG00000028587	-0.147648	0.0706129	PRSS54	0.577043	0.146372	1.97904	0.0192187	two	13930394	0.536615	0.684263	-0.147648	0.0706129	-2.09094	0.0746312	0.0938237	0.036533	0.35866	18159734	promoter-TSS (ENSSSCT00000027270)	-503	ENSSSCT00000027270	PRSS54
chr6	18159754	18159755	0.9286	0.8182	0.8824	1	0	0.8667	ENSSSCG00000028587	-0.147648	0.0913456	PRSS54	0.577043	0.146372	1.97904	0.0192187	two	13930395	0.536615	0.684263	-0.147648	0.0913456	-1.61636	0.0662898	0.0608202	0.106016	0.599207	18159755	promoter-TSS (ENSSSCT00000027270)	-524	ENSSSCT00000027270	PRSS54
chr6	18159834	18159835	0.8	0.65	1	0.7857	0	0.5455	ENSSSCG00000028587	-0.172347	0.0924932	PRSS54	0.577043	0.146372	1.97904	0.0192187	two	13930396	0.486348	0.658696	-0.172347	0.0924932	-1.86335	0.0702949	0.0512562	0.0624129	0.471727	18159835	promoter-TSS (ENSSSCT00000027270)	-604	ENSSSCT00000027270	PRSS54
chr6	18159868	18159869	0.8462	0.7368	1	1	0	0.6364	ENSSSCG00000028587	-0.18631	0.0924424	PRSS54	0.577043	0.146372	1.97904	0.0192187	two	13930397	0.460648	0.646958	-0.18631	0.0924424	-2.01542	0.0622008	0.0652073	0.0438606	0.395085	18159869	promoter-TSS (ENSSSCT00000027270)	-638	ENSSSCT00000027270	PRSS54
chr6	18159885	18159886	1	0.8889	1	1	0	0.6	ENSSSCG00000028587	-0.195647	0.0666448	PRSS54	0.577043	0.146372	1.97904	0.0192187	two	13930398	0.425141	0.620788	-0.195647	0.0666448	-2.93567	0.0582614	0.0585928	0.00332827	0.0810449	18159886	promoter-TSS (ENSSSCT00000027270)	-655	ENSSSCT00000027270	PRSS54
chr6	18159978	18159979	0.9655	0.75	0.6471	0.9706	0	0.2	ENSSSCG00000028587	-0.170914	0.0721749	PRSS54	0.577043	0.146372	1.97904	0.0192187	two	13930404	0.423315	0.59423	-0.170914	0.0721749	-2.36806	0.0738299	0.135126	0.0178817	0.239115	18159979	promoter-TSS (ENSSSCT00000027270)	-748	ENSSSCT00000027270	PRSS54
chr6	42675130	42675131	0.6923	0.6522	1	0.6923	0.9524	0	ENSSSCG00000023212	-0.173166	0.0842502	PPP1R14A	67.3421	25.4828	1.40199	1.3e-33	two	14125849	0.250468	0.423635	-0.173166	0.0842502	-2.05538	0.249728	0.55597	0.039842	0.375641	42675131	promoter-TSS (ENSSSCT00000029365)	-423	ENSSSCT00000029365	CPI17	protein phosphatase 1 regulatory subunit 14A
chr6	42675138	42675139	0.4286	0.6154	0.7	0.875	0.8824	0.0588	ENSSSCG00000023212	-0.197545	0.103032	PPP1R14A	67.3421	25.4828	1.40199	1.3e-33	two	14125850	0.277284	0.474829	-0.197545	0.103032	-1.91732	0.50831	0.239239	0.0551968	0.444034	42675139	promoter-TSS (ENSSSCT00000029365)	-431	ENSSSCT00000029365	CPI17	protein phosphatase 1 regulatory subunit 14A
chr6	46327543	46327544	0.6667	0.8846	1	0.5	0.8667	0.9	ENSSSCG00000003061	-0.117196	0.0629442	CADM4	59.7266	37.5162	0.67086	9.22e-25	two	14167781	0.79483	0.912025	-0.117196	0.0629442	-1.8619	0.0598302	0.0626167	0.0626177	0.472461	46327544	promoter-TSS (ENSSSCT00000003398)	-180	ENSSSCT00000003398	CADM4
chr6	46327713	46327714	0.8571	1	0.8571	0.6	0.75	0.9	ENSSSCG00000003061	-0.119316	0.0528709	CADM4	59.7266	37.5162	0.67086	9.22e-25	two	14167785	0.783862	0.903178	-0.119316	0.0528709	-2.25675	0.110339	0.0473056	0.0240236	0.284146	46327714	promoter-TSS (ENSSSCT00000003398)	-350	ENSSSCT00000003398	CADM4
chr6	46327752	46327753	0.9167	0.5455	0.6364	0.4545	0.8667	1	ENSSSCG00000003061	-0.119316	0.0682085	CADM4	59.7266	37.5162	0.67086	9.22e-25	two	14167786	0.783862	0.903178	-0.119316	0.0682085	-1.74929	0.0506963	0.137081	0.0802409	0.53081	46327753	promoter-TSS (ENSSSCT00000003398)	-389	ENSSSCT00000003398	CADM4
chr6	58280015	58280016	0.7143	0.9385	1	0.7647	0.6364	0.1538	ENSSSCG00000003347	-0.115746	0.0607072	MRPL20	34.217	18.1216	0.917001	1.47e-18	two	14330976	0.184419	0.300166	-0.115746	0.0607072	-1.90663	0.119661	0.0725527	0.0565687	0.449498	58280016	promoter-TSS (ENSSSCT00000003716)	-309	ENSSSCT00000003716	MRPL20	large subunit ribosomal protein L20
chr6	58280017	58280018	0.7143	0.6667	0.9286	1	0.8409	0.1538	ENSSSCG00000003347	-0.115746	0.062284	MRPL20	34.217	18.1216	0.917001	1.47e-18	two	14330977	0.184419	0.300166	-0.115746	0.062284	-1.85836	0.0771125	0.0725527	0.0631179	0.474288	58280018	promoter-TSS (ENSSSCT00000003716)	-311	ENSSSCT00000003716	MRPL20	large subunit ribosomal protein L20
chr6	58280024	58280025	0.9	0.7333	1	0.8182	0.5479	0.1667	ENSSSCG00000003347	-0.114372	0.0626535	MRPL20	34.217	18.1216	0.917001	1.47e-18	two	14330978	0.189868	0.30424	-0.114372	0.0626535	-1.82547	0.07734	0.0682051	0.0679305	0.491325	58280025	promoter-TSS (ENSSSCT00000003716)	-318	ENSSSCT00000003716	MRPL20	large subunit ribosomal protein L20
chr6	58298558	58298559	0.8636	0.6	1	1	1	0	ENSSSCG00000003344	-0.102578	0.109229	VWA1	10.9135	3.73593	1.54658	1.58e-26	two	14331539	0.281268	0.383846	-0.102578	0.109229	-0.93911	0.0519175	0.0944799	0.347674	0.879522	58298559	promoter-TSS (ENSSSCT00000003713)	-464	ENSSSCT00000003713	VWA1
chr6	58298592	58298593	0.8421	0.6667	0.875	0.6923	0.9811	0.4	ENSSSCG00000003344	-0.121394	0.0665032	VWA1	10.9135	3.73593	1.54658	1.58e-26	two	14331542	0.256509	0.377902	-0.121394	0.0665032	-1.82538	0.0746312	0.0653571	0.0679438	0.49137	58298593	promoter-TSS (ENSSSCT00000003713)	-430	ENSSSCT00000003713	VWA1
chr6	58298608	58298609	0.8333	0.7143	1	0.9333	1	0.5833	ENSSSCG00000003344	-0.156521	0.0626149	VWA1	10.9135	3.73593	1.54658	1.58e-26	two	14331543	0.227496	0.384018	-0.156521	0.0626149	-2.49975	0.0746312	0.127466	0.0124282	0.191786	58298609	promoter-TSS (ENSSSCT00000003713)	-414	ENSSSCT00000003713	VWA1
chr6	58298632	58298633	1	0.8333	1	0.9333	1	0.2	ENSSSCG00000003344	-0.170287	0.0583459	VWA1	10.9135	3.73593	1.54658	1.58e-26	two	14331544	0.208884	0.379172	-0.170287	0.0583459	-2.91858	0.0746312	0.05589	0.00351629	0.0841532	58298633	promoter-TSS (ENSSSCT00000003713)	-390	ENSSSCT00000003713	VWA1
chr6	58298645	58298646	0.7647	0.9091	0.8333	1	1	0.4	ENSSSCG00000003344	-0.178873	0.0545562	VWA1	10.9135	3.73593	1.54658	1.58e-26	two	14331545	0.183986	0.362859	-0.178873	0.0545562	-3.27869	0.0746312	0.0688032	0.00104289	0.0358413	58298646	promoter-TSS (ENSSSCT00000003713)	-377	ENSSSCT00000003713	VWA1
chr6	58298649	58298650	0.3125	0.8182	1	1	1	0.4	ENSSSCG00000003344	-0.184201	0.0415725	VWA1	10.9135	3.73593	1.54658	1.58e-26	two	14331546	0.180531	0.364733	-0.184201	0.0415725	-4.43084	0.0746312	0.0594184	9.39e-06	0.000956661	58298650	promoter-TSS (ENSSSCT00000003713)	-373	ENSSSCT00000003713	VWA1
chr6	65255373	65255374	0.8462	0.5833	0.6452	0.7	0.9565	0.9	ENSSSCG00000003414	-0.131627	0.0597263	ANGPTL7	0.7913	0.137748	2.5222	0.00122251	two	14417596	0.70123	0.832857	-0.131627	0.0597263	-2.20384	0.143775	0.0742447	0.0275358	0.306966	65255374	promoter-TSS (ENSSSCT00000003787)	12	ENSSSCT00000003787	ANGPTL7
chr6	65255385	65255386	0.8571	0.6216	0.25	0.7333	0.7083	0.7222	ENSSSCG00000003414	-0.131627	0.0604143	ANGPTL7	0.7913	0.137748	2.5222	0.00122251	two	14417597	0.70123	0.832857	-0.131627	0.0604143	-2.17874	0.131156	0.040432	0.0293511	0.318132	65255386	promoter-TSS (ENSSSCT00000003787)	24	ENSSSCT00000003787	ANGPTL7
chr6	68658978	68658979	1	0.6875	0.8947	0.8571	0.5714	0.8519	ENSSSCG00000003454	-0.102177	0.0664245	KAZN	11.2345	6.24776	0.846523	4.44e-24	two	14458563	0.802357	0.904535	-0.102177	0.0664245	-1.53825	0.041761	0.0372732	0.123988	0.638636	68658979	promoter-TSS (ENSSSCT00000003835)	-268	ENSSSCT00000003835	KAZN
chr6	86801382	86801383	0.8	1	1	1	0.92	0.6	ENSSSCG00000003646	-0.106036	0.0555611	POU3F1	1.68873	0.712774	1.24442	0.00370347	two	14632137	0.702671	0.808707	-0.106036	0.0555611	-1.90846	0.0650699	0.0650538	0.0563323	0.448545	86801383	promoter-TSS (ENSSSCT00000004042)	-416	ENSSSCT00000004042	POU3F1
chr6	86801395	86801396	1	0.9048	0.8571	1	1	0.8182	ENSSSCG00000003646	-0.106036	0.0533995	POU3F1	1.68873	0.712774	1.24442	0.00370347	two	14632138	0.702671	0.808707	-0.106036	0.0533995	-1.98571	0.0761967	0.115632	0.0470655	0.409721	86801396	promoter-TSS (ENSSSCT00000004042)	-429	ENSSSCT00000004042	POU3F1
chr6	86801418	86801419	0.9048	0.92	0	0.9394	1	1	ENSSSCG00000003646	-0.106036	0.0570511	POU3F1	1.68873	0.712774	1.24442	0.00370347	two	14632139	0.702671	0.808707	-0.106036	0.0570511	-1.85861	0.0648102	0.0670925	0.0630819	0.474158	86801419	promoter-TSS (ENSSSCT00000004042)	-452	ENSSSCT00000004042	POU3F1
chr6	86801424	86801425	1	0.9259	0	1	0.8	0.9167	ENSSSCG00000003646	-0.106036	0.0539502	POU3F1	1.68873	0.712774	1.24442	0.00370347	two	14632140	0.702671	0.808707	-0.106036	0.0539502	-1.96544	0.080137	0.123498	0.049363	0.419841	86801425	promoter-TSS (ENSSSCT00000004042)	-458	ENSSSCT00000004042	POU3F1
chr6	86801443	86801444	0.9091	0.931	0	0.9091	0.7647	1	ENSSSCG00000003646	-0.106036	0.0526972	POU3F1	1.68873	0.712774	1.24442	0.00370347	two	14632141	0.702671	0.808707	-0.106036	0.0526972	-2.01218	0.0670015	0.0759165	0.0442014	0.396643	86801444	promoter-TSS (ENSSSCT00000004042)	-477	ENSSSCT00000004042	POU3F1
chr6	86801449	86801450	0.9167	0.7857	0	1	0.5714	0.875	ENSSSCG00000003646	-0.106036	0.0338029	POU3F1	1.68873	0.712774	1.24442	0.00370347	two	14632143	0.702671	0.808707	-0.106036	0.0338029	-3.13689	0.0746312	0.0842185	0.00170753	0.0509319	86801450	promoter-TSS (ENSSSCT00000004042)	-483	ENSSSCT00000004042	POU3F1
chr6	86801451	86801452	0.8182	0.8519	0.4286	0.9091	0.7143	0.875	ENSSSCG00000003646	-0.106036	0.0354031	POU3F1	1.68873	0.712774	1.24442	0.00370347	two	14632145	0.702671	0.808707	-0.106036	0.0354031	-2.9951	0.0746312	0.0627268	0.00274353	0.0709577	86801452	promoter-TSS (ENSSSCT00000004042)	-485	ENSSSCT00000004042	POU3F1
chr6	86801465	86801466	0.9323	0.9	0.3333	0.9167	0.7059	1	ENSSSCG00000003646	-0.107982	0.0543413	POU3F1	1.68873	0.712774	1.24442	0.00370347	two	14632147	0.709949	0.817932	-0.107982	0.0543413	-1.98712	0.0588789	0.0764453	0.0469096	0.409025	86801466	promoter-TSS (ENSSSCT00000004042)	-499	ENSSSCT00000004042	POU3F1
chr6	86801468	86801469	0.9104	1	0.7	0.913	0.6087	0.7647	ENSSSCG00000003646	-0.107982	0.0524461	POU3F1	1.68873	0.712774	1.24442	0.00370347	two	14632149	0.709949	0.817932	-0.107982	0.0524461	-2.05892	0.0687882	0.111967	0.0395015	0.373942	86801469	promoter-TSS (ENSSSCT00000004042)	-502	ENSSSCT00000004042	POU3F1
chr6	86801521	86801522	0.8696	0.7143	0.6842	1	0.7941	0.8333	ENSSSCG00000003646	-0.107982	0.0313009	POU3F1	1.68873	0.712774	1.24442	0.00370347	two	14632151	0.709949	0.817932	-0.107982	0.0313009	-3.44982	0.0746312	0.0917208	0.000560958	0.0228027	86801522	promoter-TSS (ENSSSCT00000004042)	-555	ENSSSCT00000004042	POU3F1
chr6	86801522	86801523	1	0.9268	1	1	0.8462	1	ENSSSCG00000003646	-0.107982	0.0532534	POU3F1	1.68873	0.712774	1.24442	0.00370347	two	14632152	0.709949	0.817932	-0.107982	0.0532534	-2.02771	0.0632501	0.0688531	0.0425896	0.389071	86801523	promoter-TSS (ENSSSCT00000004042)	-556	ENSSSCT00000004042	POU3F1
chr6	89418899	89418900	0.8148	1	0	1	0	0	ENSSSCG00000023322	-0.112914	0.101674	COL9A2	2.1608	1.18965	0.861026	0.00051891	two	14654429	0.197375	0.310289	-0.112914	0.101674	-1.11055	0.0746312	0.147935	0.266762	0.825037	89418900	promoter-TSS (ENSSSCT00000029893)	-801	ENSSSCT00000029893	COL9A2	collagen, type IX, alpha
chr6	92014158	92014159	0.5	0.8095	0.9231	1	1	0	ENSSSCG00000003681	-0.264394	0.212037	TWSG1	22.0211	15.2798	0.527266	0.000741822	two	14676080	0.0798481	0.344242	-0.264394	0.212037	-1.24692	0.0726753	0.148593	0.212425	0.772486	92014159	promoter-TSS (ENSSSCT00000004079)	-709	ENSSSCT00000004079	TWSG1
chr7	105200596	105200597	1	0.5882	0.8571	0.9545	1	0	ENSSSCG00000002385	-0.105431	0.0619734	TGFB3	2.36192	1.52922	0.627166	6.66e-06	two	16073876	0.278563	0.383994	-0.105431	0.0619734	-1.70123	0.158829	0.294955	0.0889001	0.555689	105200597	promoter-TSS (ENSSSCT00000002652)	-878	ENSSSCT00000002652	TGFB3	transforming growth factor beta-3
chr7	45124252	45124253	0.2759	0.5185	0.8462	0.9	0.9333	0.2	ENSSSCG00000001702	-0.222046	0.0819822	SLC35B2	9.36534	6.42444	0.543762	3.87e-06	two	15630684	0.23722	0.459265	-0.222046	0.0819822	-2.70846	0.131019	0.0900644	0.00675963	0.130173	45124253	promoter-TSS (ENSSSCT00000001902)	-787	ENSSSCT00000001902	SLC35B2
chr7	45124322	45124323	0.3636	0.619	1	0.7778	1	0.0769	ENSSSCG00000001702	-0.24603	0.0780466	SLC35B2	9.36534	6.42444	0.543762	3.87e-06	two	15630685	0.240382	0.486412	-0.24603	0.0780466	-3.15234	0.773992	0.503083	0.00161965	0.0490639	45124323	promoter-TSS (ENSSSCT00000001902)	-857	ENSSSCT00000001902	SLC35B2
chr7	45124328	45124329	0.6567	0.4375	0.6	1	0.9333	0.2857	ENSSSCG00000001702	-0.225335	0.105235	SLC35B2	9.36534	6.42444	0.543762	3.87e-06	two	15630686	0.255841	0.481176	-0.225335	0.105235	-2.14124	0.114778	0.30319	0.0322543	0.335152	45124329	promoter-TSS (ENSSSCT00000001902)	-863	ENSSSCT00000001902	SLC35B2
chr7	45124344	45124345	0.8209	0.1538	0.875	1	0.8667	0.1176	ENSSSCG00000001702	-0.280182	0.114471	SLC35B2	9.36534	6.42444	0.543762	3.87e-06	two	15630687	0.261024	0.541207	-0.280182	0.114471	-2.44763	0.113288	0.256601	0.0143797	0.209691	45124345	promoter-TSS (ENSSSCT00000001902)	-879	ENSSSCT00000001902	SLC35B2
chr7	45124414	45124415	0.7333	0.1	0.9286	1	1	0.8235	ENSSSCG00000001702	-0.156405	0.115863	SLC35B2	9.36534	6.42444	0.543762	3.87e-06	two	15630688	0.379802	0.536207	-0.156405	0.115863	-1.34991	0.542536	0.150104	0.177045	0.727935	45124415	promoter-TSS (ENSSSCT00000001902)	-949	ENSSSCT00000001902	SLC35B2
chr7	56927424	56927425	0.6842	0.8182	0.5	0.8333	1	1	ENSSSCG00000001795	-0.113332	0.0571062	SH3GL3	84.651	44.2331	0.9364	2.2e-53	two	15734088	0.670106	0.783437	-0.113332	0.0571062	-1.98458	0.0897529	0.117005	0.0471917	0.410269	56927425	promoter-TSS (ENSSSCT00000029711)	84	ENSSSCT00000029711	SH3GL3	endophilin-A
chr7	56927519	56927520	1	0.9091	0.9167	0.28	0.6923	0.3333	ENSSSCG00000001795	-0.113332	0.0793736	SH3GL3	84.651	44.2331	0.9364	2.2e-53	two	15734093	0.670106	0.783437	-0.113332	0.0793736	-1.42783	0.048484	0.14294	0.153342	0.692238	56927520	promoter-TSS (ENSSSCT00000029711)	-11	ENSSSCT00000029711	SH3GL3	endophilin-A
chr7	58627642	58627643	0.6897	0.2222	0.6154	0.2667	0	0.8182	ENSSSCG00000001823	-0.120203	0.162346	UROC1	0.612925	0.296601	1.04719	0.00622844	two	15752331	0.657859	0.778062	-0.120203	0.162346	-0.740411	0.0582335	0.0452512	0.459051	0.927264	58627643	promoter-TSS (ENSSSCT00000002042)	-661	ENSSSCT00000002042	UROC1	urocanate hydratase
chr7	60158000	60158001	0.9091	0.9032	1	0.9375	0.4103	1	ENSSSCG00000001846	-0.143076	0.141746	WDR93	1.79914	0.924934	0.959887	0.000422231	two	15770437	0.528681	0.671757	-0.143076	0.141746	-1.00939	0.308783	0.217573	0.312789	0.858721	60158001	promoter-TSS (ENSSSCT00000002069)	-34	ENSSSCT00000002069	WDR93
chr7	97578450	97578451	0.9818	1	0.9091	0.6316	0.75	1	ENSSSCG00000002292	-0.222009	0.156303	PLEKHH1	86.7924	32.244	1.42854	1.86e-163	two	15995043	0.76447	0.986479	-0.222009	0.156303	-1.42037	0.0563133	0.075887	0.155499	0.695727	97578451	promoter-TSS (ENSSSCT00000002553)	-972	ENSSSCT00000002553	PLEKHH1
chr8	12351991	12351992	0.8077	0.65	1	0.4545	0.8571	0	ENSSSCG00000029508	-0.109706	0.0521335	QDPR	67.087	28.1027	1.25533	1.49e-84	two	16508489	0.114012	0.223718	-0.109706	0.0521335	-2.10433	0.0952154	0.215238	0.0353492	0.352326	12351992	promoter-TSS (ENSSSCT00000022820)	-100	ENSSSCT00000022820	QDPR	dihydropteridine reductase
chr8	12352048	12352049	0.8	0.6154	0.6471	0.6429	0.6923	0	ENSSSCG00000029508	-0.130439	0.0655652	QDPR	67.087	28.1027	1.25533	1.49e-84	two	16508493	0.129661	0.2601	-0.130439	0.0655652	-1.98945	0.109517	0.233191	0.0466513	0.407876	12352049	promoter-TSS (ENSSSCT00000022820)	-157	ENSSSCT00000022820	QDPR	dihydropteridine reductase
chr8	12352082	12352083	0.8889	0.8438	0.1429	0	0.8333	0	ENSSSCG00000029508	-0.10458	0.0649313	QDPR	67.087	28.1027	1.25533	1.49e-84	two	16508495	0.136979	0.241559	-0.10458	0.0649313	-1.61063	0.100396	0.325885	0.107261	0.602112	12352083	promoter-TSS (ENSSSCT00000022820)	-191	ENSSSCT00000022820	QDPR	dihydropteridine reductase
chr8	126760341	126760342	0.5	0.8824	1	0.8889	0.8095	0	ENSSSCG00000023296	-0.100009	0.0921035	CENPE	1.27365	0.672557	0.92124	5.79e-06	two	17145094	0.377205	0.477214	-0.100009	0.0921035	-1.08583	0.541325	0.624455	0.277554	0.833684	126760342	promoter-TSS (ENSSSCT00000032580)	-955	ENSSSCT00000032580	CENPE
chr8	126760626	126760627	1	0.9167	0.5	0.8333	1	0.3636	ENSSSCG00000023296	-0.118969	0.0872382	CENPE	1.27365	0.672557	0.92124	5.79e-06	two	17145097	0.243976	0.362945	-0.118969	0.0872382	-1.36372	0.201787	0.252351	0.172655	0.721764	126760627	promoter-TSS (ENSSSCT00000032580)	-670	ENSSSCT00000032580	CENPE
chr8	133876099	133876100	1	0.8824	0.7143	0.3636	1	0.8	ENSSSCG00000029621	-0.138661	0.107328	BMPR1B	5.3149	3.27619	0.698025	2.53e-16	two	17179125	0.665151	0.803812	-0.138661	0.107328	-1.29193	0.545745	0.147283	0.19638	0.753443	133876100	promoter-TSS (ENSSSCT00000028459)	-607	ENSSSCT00000028459	BMPR1B
chr8	133876134	133876135	0.8696	0.5455	0.6	0.4286	0.8889	0.9412	ENSSSCG00000029621	-0.138661	0.116029	BMPR1B	5.3149	3.27619	0.698025	2.53e-16	two	17179126	0.665151	0.803812	-0.138661	0.116029	-1.19505	0.176254	0.202189	0.232066	0.793441	133876135	promoter-TSS (ENSSSCT00000028459)	-642	ENSSSCT00000028459	BMPR1B
chr8	133876212	133876213	0.9355	1	0.75	0.6154	0.9333	0.7647	ENSSSCG00000029621	-0.138661	0.109492	BMPR1B	5.3149	3.27619	0.698025	2.53e-16	two	17179127	0.665151	0.803812	-0.138661	0.109492	-1.2664	0.0587598	0.112998	0.205371	0.764355	133876213	promoter-TSS (ENSSSCT00000028459)	-720	ENSSSCT00000028459	BMPR1B
chr8	133876258	133876259	1	1	0.8667	0.1333	0.8	1	ENSSSCG00000029621	-0.138661	0.101496	BMPR1B	5.3149	3.27619	0.698025	2.53e-16	two	17179129	0.665151	0.803812	-0.138661	0.101496	-1.36617	0.083235	0.0910946	0.171885	0.720655	133876259	promoter-TSS (ENSSSCT00000028459)	-766	ENSSSCT00000028459	BMPR1B
chr8	29366544	29366545	0.8182	0.7333	0.3636	0.8235	0.875	0.6	ENSSSCG00000028471	-0.180442	0.177022	DTHD1	9.56117	4.07524	1.2303	7.44e-27	two	16591626	0.363686	0.544128	-0.180442	0.177022	-1.01932	0.0518076	0.0490146	0.308052	0.855632	29366545	promoter-TSS (ENSSSCT00000028675)	-359	ENSSSCT00000028675	DTHD1
chr8	41045034	41045035	0.3448	1	1	0.9286	1	0.8519	ENSSSCG00000008830	-0.102894	0.0459406	CWH43	3.53599	1.68615	1.06838	3.1e-08	two	16674760	0.486138	0.589032	-0.102894	0.0459406	-2.23971	0.257473	0.162514	0.0251096	0.291413	41045035	promoter-TSS (ENSSSCT00000009664)	-838	ENSSSCT00000009664	CWH43
chr8	45970062	45970063	1	0.8462	0.8667	0.6667	0.9	0.8333	ENSSSCG00000008860	-0.133505	0.0837482	YBX1	17.9291	12.1342	0.563224	5.61e-06	two	16714640	0.63303	0.766535	-0.133505	0.0837482	-1.59412	0.0709384	0.114363	0.110909	0.610461	45970063	promoter-TSS (ENSSSCT00000009700)	-363	ENSSSCT00000009700
chr8	45970185	45970186	1	0.8571	0.9615	0.8333	0.8182	0.3636	ENSSSCG00000008860	-0.158421	0.116434	YBX1	17.9291	12.1342	0.563224	5.61e-06	two	16714641	0.365628	0.524049	-0.158421	0.116434	-1.3606	0.0497072	0.0608301	0.173641	0.723152	45970186	promoter-TSS (ENSSSCT00000009700)	-240	ENSSSCT00000009700
chr8	76106787	76106788	0.8182	0.4375	0.75	0.8421	0.9677	0.1333	ENSSSCG00000008980	-0.116281	0.0905905	SCARB2	245.381	170.945	0.521489	1.93e-31	two	16864563	0.561311	0.677592	-0.116281	0.0905905	-1.28359	0.390372	0.282713	0.199287	0.757048	76106788	promoter-TSS (ENSSSCT00000009835)	-908	ENSSSCT00000009835	SCARB2	lysosome membrane protein 2
chr8	76106800	76106801	1	0.2308	1	0.2	0.9286	0.5333	ENSSSCG00000008980	-0.116281	0.110701	SCARB2	245.381	170.945	0.521489	1.93e-31	two	16864564	0.561311	0.677592	-0.116281	0.110701	-1.05041	0.16663	0.0599332	0.293532	0.845668	76106801	promoter-TSS (ENSSSCT00000009835)	-921	ENSSSCT00000009835	SCARB2	lysosome membrane protein 2
chr8	76106825	76106826	1	0.3571	1	0.6667	0.8125	1	ENSSSCG00000008980	-0.102409	0.0741209	SCARB2	245.381	170.945	0.521489	1.93e-31	two	16864565	0.591981	0.69439	-0.102409	0.0741209	-1.38165	0.563996	0.445784	0.167078	0.713639	76106826	promoter-TSS (ENSSSCT00000009835)	-946	ENSSSCT00000009835	SCARB2	lysosome membrane protein 2
chr8	76106827	76106828	1	0.3333	1	0.7407	0.8621	0.875	ENSSSCG00000008980	-0.102409	0.133486	SCARB2	245.381	170.945	0.521489	1.93e-31	two	16864566	0.591981	0.69439	-0.102409	0.133486	-0.767192	0.0539939	0.0651785	0.442967	0.921789	76106828	promoter-TSS (ENSSSCT00000009835)	-948	ENSSSCT00000009835	SCARB2	lysosome membrane protein 2
chr8	89455565	89455566	0.8182	0.4667	0.7333	0.8571	0.2308	1	ENSSSCG00000009048	-0.124278	0.10376	GAB1	62.1827	26.2206	1.24581	6.48e-111	two	16966341	0.828116	0.952394	-0.124278	0.10376	-1.19775	0.0912888	0.0701265	0.231015	0.792393	89455566	promoter-TSS (ENSSSCT00000034785)	-536	ENSSSCT00000035764	GAB1	GRB2-associated-binding protein 1
chr9	101296600	101296601	1	0.4375	0.7273	0.8947	0.4	0.1923	ENSSSCG00000015386	-0.124525	0.0298504	FAM126A	19.5698	13.7038	0.514052	2.52e-11	two	18085497	0.0910798	0.215605	-0.124525	0.0298504	-4.17163	0.316945	0.139848	3.02e-05	0.00243605	101296601	promoter-TSS (ENSSSCT00000022993)	-309	ENSSSCT00000022993	FAM126A
chr9	101296766	101296767	0.9231	0.8929	0.6	0.6667	0.48	0.8	ENSSSCG00000015386	-0.127862	0.038262	FAM126A	19.5698	13.7038	0.514052	2.52e-11	two	18085499	0.524502	0.652364	-0.127862	0.038262	-3.34174	0.0746312	0.120346	0.00083254	0.0304485	101296767	promoter-TSS (ENSSSCT00000022993)	-475	ENSSSCT00000022993	FAM126A
chr9	101296799	101296800	0.75	0.8421	0.8	0.8182	0.7429	0.3	ENSSSCG00000015386	-0.10999	0.0372161	FAM126A	19.5698	13.7038	0.514052	2.52e-11	two	18085500	0.615546	0.725537	-0.10999	0.0372161	-2.95545	0.0746312	0.181939	0.00312216	0.0775594	101296800	promoter-TSS (ENSSSCT00000022993)	-508	ENSSSCT00000022993	FAM126A
chr9	101296815	101296816	0.8462	1	0.5	1	0.7778	0.9	ENSSSCG00000015386	-0.10999	0.0622018	FAM126A	19.5698	13.7038	0.514052	2.52e-11	two	18085501	0.615546	0.725537	-0.10999	0.0622018	-1.76828	0.0752622	0.197106	0.0770138	0.520972	101296816	promoter-TSS (ENSSSCT00000022993)	-524	ENSSSCT00000022993	FAM126A
chr9	101296840	101296841	0.8462	0.3077	1	0.7778	0.7	1	ENSSSCG00000015386	-0.10999	0.0558578	FAM126A	19.5698	13.7038	0.514052	2.52e-11	two	18085503	0.615546	0.725537	-0.10999	0.0558578	-1.96911	0.40647	0.565718	0.04894	0.418003	101296841	promoter-TSS (ENSSSCT00000022993)	-549	ENSSSCT00000022993	FAM126A
chr9	105474305	105474306	1	0.8421	1	0.6667	1	0.8	ENSSSCG00000015396	-0.140929	0.121834	SEMA3D	17.4549	6.86862	1.34554	1.01e-60	two	18107939	0.352922	0.493851	-0.140929	0.121834	-1.15674	0.0726015	0.0945953	0.247379	0.808155	105474306	promoter-TSS (ENSSSCT00000016771)	-217	ENSSSCT00000016771	SEMA3D
chr9	110557113	110557114	0.5455	0.5263	0.6452	0.3125	0.9167	0.7647	ENSSSCG00000015407	-0.110105	0.0839035	GNAI1	80.6521	51.4335	0.649002	6.89e-28	two	18133835	0.417166	0.527271	-0.110105	0.0839035	-1.31228	0.417171	0.121351	0.189426	0.744645	110557114	promoter-TSS (ENSSSCT00000016782)	-970	ENSSSCT00000016782	GNAI1	guanine nucleotide-binding protein G(i) subunit alpha
chr9	110557945	110557946	0.75	0.6667	0.8947	0.5	1	0.5833	ENSSSCG00000015407	-0.106892	0.0480896	GNAI1	80.6521	51.4335	0.649002	6.89e-28	two	18133846	0.266193	0.373085	-0.106892	0.0480896	-2.22276	0.0439184	0.120581	0.0262318	0.298691	110557946	promoter-TSS (ENSSSCT00000016782)	-138	ENSSSCT00000016782	GNAI1	guanine nucleotide-binding protein G(i) subunit alpha
chr9	11927135	11927136	0.8548	0.3333	0	0.8833	0.8947	0.4	ENSSSCG00000014869	-0.104119	0.096291	LRRC32	0.981485	0.547588	0.841874	0.000943567	two	17493288	0.650443	0.754562	-0.104119	0.096291	-1.08129	0.0491523	0.120293	0.279566	0.835224	11927136	promoter-TSS (ENSSSCT00000016222)	-669	ENSSSCT00000016222	LRRC32
chr9	11927154	11927155	0.96	0.2105	0	0.9375	0.8	0.875	ENSSSCG00000014869	-0.104119	0.0901471	LRRC32	0.981485	0.547588	0.841874	0.000943567	two	17493290	0.650443	0.754562	-0.104119	0.0901471	-1.15499	0.177194	0.0824893	0.248094	0.808812	11927155	promoter-TSS (ENSSSCT00000016222)	-688	ENSSSCT00000016222	LRRC32
chr9	11927164	11927165	0.6	0.1538	0	1	0.7273	0.3333	ENSSSCG00000014869	-0.104119	0.0914679	LRRC32	0.981485	0.547588	0.841874	0.000943567	two	17493291	0.650443	0.754562	-0.104119	0.0914679	-1.13831	0.0741932	0.129698	0.25499	0.814944	11927165	promoter-TSS (ENSSSCT00000016222)	-698	ENSSSCT00000016222	LRRC32
chr9	136022366	136022367	1	0.6364	1	1	0.8235	0.875	ENSSSCG00000015548	-0.139407	0.0790841	RGSL1	2.86966	1.84651	0.636074	7.87e-05	two	18285962	0.660807	0.800214	-0.139407	0.0790841	-1.76277	0.174098	0.0459561	0.0779396	0.523826	136022367	promoter-TSS (ENSSSCT00000016938)	-853	ENSSSCT00000016938	RGSL1
chr9	136022386	136022387	0.9722	0.8235	1	1	0.7273	1	ENSSSCG00000015548	-0.139407	0.078729	RGSL1	2.86966	1.84651	0.636074	7.87e-05	two	18285964	0.660807	0.800214	-0.139407	0.078729	-1.77072	0.0800023	0.0946227	0.0766074	0.519711	136022387	promoter-TSS (ENSSSCT00000016938)	-833	ENSSSCT00000016938	RGSL1
chr9	136022578	136022579	0.7778	0.8	1	0.88	0.9091	1	ENSSSCG00000015548	-0.155321	0.0383609	RGSL1	2.86966	1.84651	0.636074	7.87e-05	two	18285965	0.656113	0.811434	-0.155321	0.0383609	-4.04894	0.829072	0.499056	5.15e-05	0.00369923	136022579	promoter-TSS (ENSSSCT00000016938)	-641	ENSSSCT00000016938	RGSL1
chr9	136022606	136022607	0.8333	0.0909	0.9286	1	1	1	ENSSSCG00000015548	-0.155321	0.0687728	RGSL1	2.86966	1.84651	0.636074	7.87e-05	two	18285966	0.656113	0.811434	-0.155321	0.0687728	-2.25846	0.0820401	0.0924174	0.0239168	0.283419	136022607	promoter-TSS (ENSSSCT00000016938)	-613	ENSSSCT00000016938	RGSL1
chr9	136022610	136022611	0.9355	0.5	0.9333	0.8095	0.8	1	ENSSSCG00000015548	-0.155321	0.0729422	RGSL1	2.86966	1.84651	0.636074	7.87e-05	two	18285967	0.656113	0.811434	-0.155321	0.0729422	-2.12937	0.0673906	0.0787856	0.0332237	0.34061	136022611	promoter-TSS (ENSSSCT00000016938)	-609	ENSSSCT00000016938	RGSL1
chr9	136022773	136022774	0.8824	0.5833	1	0.7143	1	0.8571	ENSSSCG00000015548	-0.105618	0.0890181	RGSL1	2.86966	1.84651	0.636074	7.87e-05	two	18285970	0.685098	0.790716	-0.105618	0.0890181	-1.18648	0.0903479	0.0822657	0.235433	0.796773	136022774	promoter-TSS (ENSSSCT00000016938)	-446	ENSSSCT00000016938	RGSL1
chr9	149713406	149713407	0.8	0.7143	0.6471	0.8667	1	0.8	ENSSSCG00000015627	-0.167903	0.0434951	ZPBP	4.04669	2.40359	0.751552	0.00274296	two	18425465	0.590698	0.758601	-0.167903	0.0434951	-3.86028	0.135999	0.0605212	0.000113256	0.00682015	149713407	promoter-TSS (ENSSSCT00000017021)	-190	ENSSSCT00000017021	ZPBP
chr9	149713454	149713455	0.6	0.7333	1	0.8824	0.7857	0.8571	ENSSSCG00000015627	-0.160593	0.0615865	ZPBP	4.04669	2.40359	0.751552	0.00274296	two	18425466	0.598055	0.758647	-0.160593	0.0615865	-2.6076	0.0470707	0.0905076	0.009118	0.157878	149713455	promoter-TSS (ENSSSCT00000017021)	-238	ENSSSCT00000017021	ZPBP
chr9	149713469	149713470	0.7143	0.5	0.6	1	0.9167	0.8333	ENSSSCG00000015627	-0.160593	0.0641261	ZPBP	4.04669	2.40359	0.751552	0.00274296	two	18425467	0.598055	0.758647	-0.160593	0.0641261	-2.50433	0.0863575	0.0910711	0.0122684	0.19025	149713470	promoter-TSS (ENSSSCT00000017021)	-253	ENSSSCT00000017021	ZPBP
chr9	149713476	149713477	0.5	1	0.6	1	0.8696	1	ENSSSCG00000015627	-0.160593	0.0552702	ZPBP	4.04669	2.40359	0.751552	0.00274296	two	18425468	0.598055	0.758647	-0.160593	0.0552702	-2.90559	0.133985	0.238536	0.00366557	0.0865666	149713477	promoter-TSS (ENSSSCT00000017021)	-260	ENSSSCT00000017021	ZPBP
chr9	149713483	149713484	0.4286	0.75	0.9167	1	1	0.5385	ENSSSCG00000015627	-0.160593	0.0603563	ZPBP	4.04669	2.40359	0.751552	0.00274296	two	18425469	0.598055	0.758647	-0.160593	0.0603563	-2.66074	0.153846	0.100644	0.00779681	0.142805	149713484	promoter-TSS (ENSSSCT00000017021)	-267	ENSSSCT00000017021	ZPBP
chr9	149713485	149713486	0.8696	0.9167	1	1	0.8696	0.6923	ENSSSCG00000015627	-0.160593	0.0638733	ZPBP	4.04669	2.40359	0.751552	0.00274296	two	18425470	0.598055	0.758647	-0.160593	0.0638733	-2.51424	0.13493	0.0434597	0.0119289	0.186957	149713486	promoter-TSS (ENSSSCT00000017021)	-269	ENSSSCT00000017021	ZPBP
chr9	149713498	149713499	0.9167	0.6	1	1	1	0.2857	ENSSSCG00000015627	-0.160593	0.044005	ZPBP	4.04669	2.40359	0.751552	0.00274296	two	18425471	0.598055	0.758647	-0.160593	0.044005	-3.64943	0.253704	0.633215	0.000262828	0.0129635	149713499	promoter-TSS (ENSSSCT00000017021)	-282	ENSSSCT00000017021	ZPBP
chr9	149713508	149713509	0.4231	0.7	0.8333	1	0.8182	1	ENSSSCG00000015627	-0.164753	0.046696	ZPBP	4.04669	2.40359	0.751552	0.00274296	two	18425472	0.598619	0.763372	-0.164753	0.046696	-3.52821	0.0674911	0.391374	0.000418373	0.018356	149713509	promoter-TSS (ENSSSCT00000017021)	-292	ENSSSCT00000017021	ZPBP
chr9	149713521	149713522	0.913	0.6	0.9167	0.8333	0.7	0.75	ENSSSCG00000015627	-0.164753	0.0630947	ZPBP	4.04669	2.40359	0.751552	0.00274296	two	18425473	0.598619	0.763372	-0.164753	0.0630947	-2.61121	0.0555174	0.0542358	0.00902231	0.156829	149713522	promoter-TSS (ENSSSCT00000017021)	-305	ENSSSCT00000017021	ZPBP
chr9	149713550	149713551	1	0.5455	1	1	0.8571	0.7778	ENSSSCG00000015627	-0.164753	0.0703168	ZPBP	4.04669	2.40359	0.751552	0.00274296	two	18425474	0.598619	0.763372	-0.164753	0.0703168	-2.34301	0.0515474	0.0675349	0.0191287	0.248862	149713551	promoter-TSS (ENSSSCT00000017021)	-334	ENSSSCT00000017021	ZPBP
chr9	149713561	149713562	0.95	0.5	0.3077	0.8125	0.8824	0.8	ENSSSCG00000015627	-0.164753	0.05706	ZPBP	4.04669	2.40359	0.751552	0.00274296	two	18425475	0.598619	0.763372	-0.164753	0.05706	-2.88737	0.22615	0.0599941	0.00388478	0.0900519	149713562	promoter-TSS (ENSSSCT00000017021)	-345	ENSSSCT00000017021	ZPBP
chr9	25390340	25390341	1	0.75	0.8182	0	1	1	ENSSSCG00000014927	-0.158545	0.109138	NOX4	4.12041	2.08809	0.980607	1.23e-12	two	17585480	0.832282	0.990827	-0.158545	0.109138	-1.45271	0.0720793	0.0759465	0.146305	0.680408	25390341	promoter-TSS (ENSSSCT00000032894)	-83	ENSSSCT00000032894	NOX4
chr9	40925223	40925224	0.449	1	0.7143	0.9091	0.4545	1	ENSSSCG00000015007	-0.148834	0.0856446	ATM	31.3441	20.8739	0.586494	9.17e-15	two	17677701	0.819603	0.968438	-0.148834	0.0856446	-1.73781	0.233097	0.0561584	0.0822437	0.536727	40925224	promoter-TSS (ENSSSCT00000034631)	-671	ENSSSCT00000016371	ATM
chr9	40925423	40925424	0.4	0.625	0.8667	0.8	0.4	1	ENSSSCG00000015007	-0.148834	0.0573574	ATM	31.3441	20.8739	0.586494	9.17e-15	two	17677704	0.819603	0.968438	-0.148834	0.0573574	-2.59486	0.0625012	0.077019	0.00946294	0.161674	40925424	promoter-TSS (ENSSSCT00000034631)	-471	ENSSSCT00000016371	ATM
chr9	40925429	40925430	0.5	1	0.8667	0.913	1	1	ENSSSCG00000015007	-0.148834	0.0502433	ATM	31.3441	20.8739	0.586494	9.17e-15	two	17677705	0.819603	0.968438	-0.148834	0.0502433	-2.96227	0.17216	0.0776296	0.00305376	0.0763908	40925430	promoter-TSS (ENSSSCT00000034631)	-465	ENSSSCT00000016371	ATM
chr9	40925449	40925450	0.8333	0.9167	0.6667	1	0.5	1	ENSSSCG00000015007	-0.148834	0.0493331	ATM	31.3441	20.8739	0.586494	9.17e-15	two	17677706	0.819603	0.968438	-0.148834	0.0493331	-3.01693	0.220233	0.0782345	0.00255353	0.0675108	40925450	promoter-TSS (ENSSSCT00000034631)	-445	ENSSSCT00000016371	ATM
chr9	40925452	40925453	0.1983	0.8571	1	0.7333	0.5556	1	ENSSSCG00000015007	-0.148834	0.0621906	ATM	31.3441	20.8739	0.586494	9.17e-15	two	17677708	0.819603	0.968438	-0.148834	0.0621906	-2.3932	0.0686768	0.0794522	0.0167022	0.229568	40925453	promoter-TSS (ENSSSCT00000034631)	-442	ENSSSCT00000016371	ATM
chr9	44430415	44430416	0.7	0.8333	0.7083	0.375	0.6429	0.8	ENSSSCG00000015027	-0.112501	0.0858673	HSPB2	6.69644	3.66087	0.87121	2.98e-06	two	17697537	0.651958	0.764459	-0.112501	0.0858673	-1.31017	0.0443009	0.0468589	0.190138	0.745555	44430416	promoter-TSS (ENSSSCT00000016391)	-999	ENSSSCT00000016391		heat shock protein beta-2
chr9	49291251	49291252	1	1	1	0.9412	0.7059	0.5	ENSSSCG00000030921	-0.105211	0.0744162	APOA1	14.0601	8.41284	0.740941	0.00357969	two	17752986	0.398003	0.503214	-0.105211	0.0744162	-1.41382	0.0440703	0.0526257	0.157415	0.698815	49291252	promoter-TSS (ENSSSCT00000034599)	-468	ENSSSCT00000034599	APOA1
chr9	49291254	49291255	1	0.8462	0.8824	0.8571	0.875	0.4	ENSSSCG00000030921	-0.105211	0.0595506	APOA1	14.0601	8.41284	0.740941	0.00357969	two	17752987	0.398003	0.503214	-0.105211	0.0595506	-1.76675	0.115095	0.153674	0.0772699	0.521781	49291255	promoter-TSS (ENSSSCT00000034599)	-471	ENSSSCT00000034599	APOA1
chr9	49291259	49291260	0.8947	1	0.9091	0.9231	1	0.2857	ENSSSCG00000030921	-0.105211	0.0651556	APOA1	14.0601	8.41284	0.740941	0.00357969	two	17752988	0.398003	0.503214	-0.105211	0.0651556	-1.61477	0.108421	0.0791969	0.106361	0.600018	49291260	promoter-TSS (ENSSSCT00000034599)	-476	ENSSSCT00000034599	APOA1
chr9	49291291	49291292	1	0.8889	0.8947	0.9286	0.8	0.6364	ENSSSCG00000030921	-0.104097	0.0532178	APOA1	14.0601	8.41284	0.740941	0.00357969	two	17752989	0.409085	0.513183	-0.104097	0.0532178	-1.95606	0.209678	0.131648	0.0504582	0.424534	49291292	promoter-TSS (ENSSSCT00000034599)	-508	ENSSSCT00000034599	APOA1
chr9	49291301	49291302	0.9	0.9545	0.9048	0.5455	0.8333	0.5714	ENSSSCG00000030921	-0.104097	0.0600708	APOA1	14.0601	8.41284	0.740941	0.00357969	two	17752990	0.409085	0.513183	-0.104097	0.0600708	-1.73291	0.175341	0.0587013	0.0831117	0.539297	49291302	promoter-TSS (ENSSSCT00000034599)	-518	ENSSSCT00000034599	APOA1
chr9	49291317	49291318	1	1	0.9048	0.875	0.8333	0.6923	ENSSSCG00000030921	-0.104097	0.0553572	APOA1	14.0601	8.41284	0.740941	0.00357969	two	17752991	0.409085	0.513183	-0.104097	0.0553572	-1.88047	0.104659	0.0730906	0.0600447	0.462907	49291318	promoter-TSS (ENSSSCT00000034599)	-534	ENSSSCT00000034599	APOA1
chr9	61926912	61926913	1	0.7143	0.9	1	0.6154	0.8333	ENSSSCG00000021573	-0.181682	0.104435	KCNJ5	2.41845	1.31217	0.882123	1.85e-08	two	17857218	0.609546	0.791228	-0.181682	0.104435	-1.73966	0.190317	0.0602222	0.0819186	0.535768	61926913	promoter-TSS (ENSSSCT00000027719)	-985	ENSSSCT00000027719	KCNJ5	potassium inwardly-rectifying channel subfamily J member 5
chr9	61926969	61926970	0.8824	0.3333	0.8947	1	0.7333	1	ENSSSCG00000021573	-0.181682	0.0657121	KCNJ5	2.41845	1.31217	0.882123	1.85e-08	two	17857219	0.609546	0.791228	-0.181682	0.0657121	-2.76482	0.563493	0.335098	0.00569547	0.116363	61926970	promoter-TSS (ENSSSCT00000027719)	-928	ENSSSCT00000027719	KCNJ5	potassium inwardly-rectifying channel subfamily J member 5
chr9	67274316	67274317	0.85	0.9	1	0.7941	0.25	0.8	ENSSSCG00000015256	-0.160875	0.0512538	JAM3	96.9192	44.19	1.13306	1.05e-51	two	17915503	0.774069	0.934944	-0.160875	0.0512538	-3.13879	0.0485354	0.0816969	0.00169649	0.0506941	67274317	promoter-TSS (ENSSSCT00000016625)	-774	ENSSSCT00000016625	JAM3	junctional adhesion molecule 3
chr9	67274495	67274496	0.8571	1	1	0.6667	0.7273	0.9	ENSSSCG00000015256	-0.160875	0.0629183	JAM3	96.9192	44.19	1.13306	1.05e-51	two	17915504	0.774069	0.934944	-0.160875	0.0629183	-2.55688	0.0473889	0.0533768	0.0105614	0.173235	67274496	promoter-TSS (ENSSSCT00000016625)	-595	ENSSSCT00000016625	JAM3	junctional adhesion molecule 3
chr9	67274529	67274530	1	0.8	1	0.65	0.7273	1	ENSSSCG00000015256	-0.160875	0.0650935	JAM3	96.9192	44.19	1.13306	1.05e-51	two	17915506	0.774069	0.934944	-0.160875	0.0650935	-2.47144	0.0400138	0.0692343	0.013457	0.201399	67274530	promoter-TSS (ENSSSCT00000016625)	-561	ENSSSCT00000016625	JAM3	junctional adhesion molecule 3
chr9	70136833	70136834	0.6429	1	0.8571	0.9394	0.8235	0.8333	ENSSSCG00000015268	-0.107524	0.0883258	FMO1	5.01778	2.05934	1.28486	6.98e-14	two	17926555	0.590423	0.697947	-0.107524	0.0883258	-1.21736	0.0716843	0.0729283	0.223468	0.784643	70136834	promoter-TSS (ENSSSCT00000016637)	-958	ENSSSCT00000016637	FMO1	dimethylaniline monooxygenase (N-oxide forming)
chr9	70136838	70136839	0.7647	1	0.9	0.7778	0.8182	0.4615	ENSSSCG00000015268	-0.107524	0.0911375	FMO1	5.01778	2.05934	1.28486	6.98e-14	two	17926556	0.590423	0.697947	-0.107524	0.0911375	-1.1798	0.0542642	0.0717632	0.238079	0.799402	70136839	promoter-TSS (ENSSSCT00000016637)	-953	ENSSSCT00000016637	FMO1	dimethylaniline monooxygenase (N-oxide forming)
chr9	70136868	70136869	0.6	0.9394	0.8	0.8462	0.8	0.8947	ENSSSCG00000015268	-0.107524	0.0813123	FMO1	5.01778	2.05934	1.28486	6.98e-14	two	17926557	0.590423	0.697947	-0.107524	0.0813123	-1.32236	0.108952	0.132291	0.186049	0.74017	70136869	promoter-TSS (ENSSSCT00000016637)	-923	ENSSSCT00000016637	FMO1	dimethylaniline monooxygenase (N-oxide forming)
chr9	71839889	71839890	0.9048	0.7895	0.1429	0.7647	1	1	ENSSSCG00000022951	-0.10205	0.0322485	NFASC	223.484	82.6061	1.43585	3.33e-139	two	17943063	0.82699	0.929041	-0.10205	0.0322485	-3.1645	0.119872	0.0819644	0.00155347	0.0476316	71839890	promoter-TSS (ENSSSCT00000031275)	86	ENSSSCT00000031275	NFASC
chr9	81643101	81643102	0.8776	0.8889	0.9259	0.76	1	0.4545	ENSSSCG00000015328	-0.148167	0.0390576	SGCE	18.3102	10.9177	0.745975	4.08e-09	two	18004118	0.553147	0.701314	-0.148167	0.0390576	-3.79356	0.0859264	0.177306	0.000148505	0.00839499	81643102	promoter-TSS (ENSSSCT00000016701)	-250	ENSSSCT00000016701	SGCE
chr9	81643102	81643103	1	0.931	0.7692	0.913	0.9	1	ENSSSCG00000015328	-0.148167	0.0359617	SGCE	18.3102	10.9177	0.745975	4.08e-09	two	18004119	0.553147	0.701314	-0.148167	0.0359617	-4.12013	0.0746312	0.137163	3.79e-05	0.00290922	81643103	promoter-TSS (ENSSSCT00000016701)	-251	ENSSSCT00000016701	SGCE
chr9	81643115	81643116	0.95	0.8889	0.92	0.7895	0.9355	0.4545	ENSSSCG00000015328	-0.148167	0.0507936	SGCE	18.3102	10.9177	0.745975	4.08e-09	two	18004120	0.553147	0.701314	-0.148167	0.0507936	-2.91704	0.0589741	0.165639	0.00353367	0.0844336	81643116	promoter-TSS (ENSSSCT00000016701)	-264	ENSSSCT00000016701	SGCE
chr9	81643116	81643117	1	0.7727	1	0.5833	0.4324	1	ENSSSCG00000015328	-0.145555	0.0358522	SGCE	18.3102	10.9177	0.745975	4.08e-09	two	18004121	0.552239	0.697793	-0.145555	0.0358522	-4.05986	0.0746312	0.277402	4.91e-05	0.00356684	81643117	promoter-TSS (ENSSSCT00000016701)	-265	ENSSSCT00000016701	SGCE
chr9	81643131	81643132	0.7727	0.6429	1	0	1	0.2727	ENSSSCG00000015328	-0.148791	0.0459348	SGCE	18.3102	10.9177	0.745975	4.08e-09	two	18004122	0.54753	0.696321	-0.148791	0.0459348	-3.23917	0.092505	0.240993	0.00119879	0.0396018	81643132	promoter-TSS (ENSSSCT00000016701)	-280	ENSSSCT00000016701	SGCE
chr9	81643148	81643149	0.7391	0.8182	1	0.5714	1	0.3846	ENSSSCG00000015328	-0.149561	0.0525335	SGCE	18.3102	10.9177	0.745975	4.08e-09	two	18004124	0.543278	0.692838	-0.149561	0.0525335	-2.84695	0.0679122	0.106217	0.00441398	0.0981629	81643149	promoter-TSS (ENSSSCT00000016701)	-297	ENSSSCT00000016701	SGCE
chr9	81643162	81643163	0.6739	0.8	1	0.8333	1	0.4667	ENSSSCG00000015328	-0.151165	0.0487286	SGCE	18.3102	10.9177	0.745975	4.08e-09	two	18004126	0.539825	0.69099	-0.151165	0.0487286	-3.10217	0.0570883	0.161093	0.00192108	0.0553413	81643163	promoter-TSS (ENSSSCT00000016701)	-311	ENSSSCT00000016701	SGCE
chr9	81643169	81643170	0.8723	0.7234	1	0.9444	0.6429	0.4667	ENSSSCG00000015328	-0.151165	0.0523338	SGCE	18.3102	10.9177	0.745975	4.08e-09	two	18004128	0.539825	0.69099	-0.151165	0.0523338	-2.88847	0.0538995	0.165156	0.00387121	0.0898347	81643170	promoter-TSS (ENSSSCT00000016701)	-318	ENSSSCT00000016701	SGCE
chr9	81643171	81643172	0.383	0.4898	1	0.5741	0.9167	0.4667	ENSSSCG00000015328	-0.151165	0.0583689	SGCE	18.3102	10.9177	0.745975	4.08e-09	two	18004130	0.539825	0.69099	-0.151165	0.0583689	-2.58981	0.0576749	0.0742486	0.00960278	0.16316	81643172	promoter-TSS (ENSSSCT00000016701)	-320	ENSSSCT00000016701	SGCE
chr9	81643180	81643181	0.975	0.4583	0.9231	0.8182	1	0.5	ENSSSCG00000015328	-0.151165	0.0567243	SGCE	18.3102	10.9177	0.745975	4.08e-09	two	18004132	0.539825	0.69099	-0.151165	0.0567243	-2.6649	0.0635169	0.0858577	0.00770116	0.141666	81643181	promoter-TSS (ENSSSCT00000016701)	-329	ENSSSCT00000016701	SGCE
chr9	81643187	81643188	0.5806	0.6364	1	0.8696	0.44	0.4	ENSSSCG00000015328	-0.151165	0.0504738	SGCE	18.3102	10.9177	0.745975	4.08e-09	two	18004134	0.539825	0.69099	-0.151165	0.0504738	-2.99491	0.0625819	0.205263	0.00274524	0.0709871	81643188	promoter-TSS (ENSSSCT00000016701)	-336	ENSSSCT00000016701	SGCE
chr9	81643193	81643194	0.8519	0.8824	0.8182	0.8788	0.6429	0.5	ENSSSCG00000015328	-0.151165	0.0514032	SGCE	18.3102	10.9177	0.745975	4.08e-09	two	18004136	0.539825	0.69099	-0.151165	0.0514032	-2.94076	0.073334	0.157798	0.00327409	0.0801273	81643194	promoter-TSS (ENSSSCT00000016701)	-342	ENSSSCT00000016701	SGCE
chr9	81643195	81643196	0.931	0	1	0.8261	0.8462	0.4167	ENSSSCG00000015328	-0.151165	0.050556	SGCE	18.3102	10.9177	0.745975	4.08e-09	two	18004138	0.539825	0.69099	-0.151165	0.050556	-2.99004	0.0858617	0.177821	0.00278941	0.071774	81643196	promoter-TSS (ENSSSCT00000016701)	-344	ENSSSCT00000016701	SGCE
chr9	81643199	81643200	0.8571	0.9545	1	0	1	0.3077	ENSSSCG00000015328	-0.151165	0.0492347	SGCE	18.3102	10.9177	0.745975	4.08e-09	two	18004140	0.539825	0.69099	-0.151165	0.0492347	-3.07029	0.0786601	0.229875	0.00213853	0.0596722	81643200	promoter-TSS (ENSSSCT00000016701)	-348	ENSSSCT00000016701	SGCE
chr9	81643210	81643211	1	0.7241	0.7273	0.7241	0.8889	0.5	ENSSSCG00000015328	-0.151165	0.0502478	SGCE	18.3102	10.9177	0.745975	4.08e-09	two	18004142	0.539825	0.69099	-0.151165	0.0502478	-3.00838	0.091184	0.17158	0.00262641	0.0688388	81643211	promoter-TSS (ENSSSCT00000016701)	-359	ENSSSCT00000016701	SGCE
chr9	81643397	81643398	1	0.6364	1	0.9048	0.9091	0.6364	ENSSSCG00000015328	-0.100231	0.0358955	SGCE	18.3102	10.9177	0.745975	4.08e-09	two	18004158	0.539736	0.639967	-0.100231	0.0358955	-2.79231	0.0468596	0.285994	0.00523335	0.11001	81643398	promoter-TSS (ENSSSCT00000016701)	-546	ENSSSCT00000016701	SGCE
chr9	83351434	83351435	0.9	0.9167	0.6875	1	0.6	0.875	ENSSSCG00000015336	-0.125349	0.0968143	SLC25A13	31.7244	15.7901	1.00658	6.08e-40	two	18010982	0.742733	0.868083	-0.125349	0.0968143	-1.29474	0.0548396	0.0451562	0.19541	0.752237	83351435	promoter-TSS (ENSSSCT00000016709)	-474	ENSSSCT00000016709	SLC25A13
chr9	8870435	8870436	0.7143	0.8125	0	0	0.8182	0.6364	ENSSSCG00000014827	-0.131881	0.0484478	PLEKHB1	241.154	82.4364	1.5486	1.68e-183	two	17460428	0.22466	0.356541	-0.131881	0.0484478	-2.72212	0.193989	0.0950232	0.00648645	0.126736	8870436	promoter-TSS (ENSSSCT00000016179)	-847	ENSSSCT00000016179	PLEKHB1
chr9	8870447	8870448	1	0.8	0	1	1	0.4545	ENSSSCG00000014827	-0.109461	0.0482356	PLEKHB1	241.154	82.4364	1.5486	1.68e-183	two	17460429	0.216272	0.325733	-0.109461	0.0482356	-2.26929	0.095771	0.0607048	0.0232504	0.278846	8870448	promoter-TSS (ENSSSCT00000016179)	-859	ENSSSCT00000016179	PLEKHB1
chr9	8870450	8870451	0.8182	0.1111	0	1	0.7333	0.5	ENSSSCG00000014827	-0.109461	0.0475161	PLEKHB1	241.154	82.4364	1.5486	1.68e-183	two	17460430	0.216272	0.325733	-0.109461	0.0475161	-2.30366	0.106927	0.0802211	0.021242	0.26465	8870451	promoter-TSS (ENSSSCT00000016179)	-862	ENSSSCT00000016179	PLEKHB1
chrX	122015956	122015957	1	0.8261	0.5714	0	0.5385	0.4	ENSSSCG00000030843	-0.132288	0.155965	APLN	8.15835	2.22759	1.87279	1.41e-05	two	18919439	0.464523	0.596812	-0.132288	0.155965	-0.848191	0.0559945	0.0738826	0.396332	0.903386	122015957	promoter-TSS (ENSSSCT00000034129)	-767	ENSSSCT00000034129
chrX	122016168	122016169	0.7917	1	0.72	0	0.6667	0.8462	ENSSSCG00000030843	-0.135788	0.0894062	APLN	8.15835	2.22759	1.87279	1.41e-05	two	18919440	0.518751	0.654539	-0.135788	0.0894062	-1.51878	0.0746312	0.159266	0.128819	0.648312	122016169	promoter-TSS (ENSSSCT00000034129)	-979	ENSSSCT00000034129
chrX	16334293	16334294	0.96	0.95	1	1	1	0.4	ENSSSCG00000030274	-0.108724	0.110695	PPEF1	33.0377	18.0385	0.873037	2.46e-32	two	18638120	0.739181	0.847905	-0.108724	0.110695	-0.982198	0.0520631	0.157301	0.326002	0.867039	16334294	promoter-TSS (ENSSSCT00000035020)	-191	ENSSSCT00000035020	PPEF1
chrX	16346020	16346021	1	0.8462	0.3214	0.6667	0.7	1	ENSSSCG00000030274	-0.138495	0.0807354	PPEF1	33.0377	18.0385	0.873037	2.46e-32	two	18638314	0.785311	0.923806	-0.138495	0.0807354	-1.71541	0.0746312	0.0829782	0.0862694	0.548316	16346021	promoter-TSS (ENSSSCT00000034554)	-938	ENSSSCT00000034554	PPEF1
chrX	16346029	16346030	0.8889	1	0.1579	0.7273	0.4	1	ENSSSCG00000030274	-0.138495	0.0807354	PPEF1	33.0377	18.0385	0.873037	2.46e-32	two	18638315	0.785311	0.923806	-0.138495	0.0807354	-1.71541	0.0746312	0.0829782	0.0862694	0.548316	16346030	promoter-TSS (ENSSSCT00000034554)	-929	ENSSSCT00000034554	PPEF1
chrX	16346040	16346041	0.9375	0.9167	0.25	0.9	1	1	ENSSSCG00000030274	-0.138495	0.0825996	PPEF1	33.0377	18.0385	0.873037	2.46e-32	two	18638316	0.785311	0.923806	-0.138495	0.0825996	-1.6767	0.0746312	0.0863947	0.0936013	0.568297	16346041	promoter-TSS (ENSSSCT00000034554)	-918	ENSSSCT00000034554	PPEF1
chrX	62968903	62968904	0.9	0.5625	0.6429	1	0.6154	0	ENSSSCG00000021647	-0.25449	0.299902	EDA	0.850051	0.364996	1.21967	2.67e-08	two	18785378	0.1167	0.37119	-0.25449	0.299902	-0.848576	0.0746312	0.149404	0.396117	0.903301	62968904	promoter-TSS (ENSSSCT00000033545)	9	ENSSSCT00000034708	EDA	ectodysplasin-A
chrX	70881198	70881199	1	0.9565	0.8	0	0.9016	0.1818	ENSSSCG00000030970	-0.108358	0.0529923	COX7B	85.361	43.084	0.986425	1.58e-61	two	18802752	0.0594369	0.167795	-0.108358	0.0529923	-2.04479	0.0560762	0.0570291	0.0408753	0.380766	70881199	promoter-TSS (ENSSSCT00000032900)	17	ENSSSCT00000035366		cytochrome c oxidase subunit 7b
chrX	70881202	70881203	0.8824	0.8182	0.5946	0.1071	0.7419	0	ENSSSCG00000030970	-0.108358	0.0508989	COX7B	85.361	43.084	0.986425	1.58e-61	two	18802754	0.0594369	0.167795	-0.108358	0.0508989	-2.12889	0.089644	0.0983038	0.033263	0.340838	70881203	promoter-TSS (ENSSSCT00000032900)	21	ENSSSCT00000035366		cytochrome c oxidase subunit 7b
chrX	70881204	70881205	1	0.8	0.8	0.4615	0.8182	0	ENSSSCG00000030970	-0.108358	0.0510045	COX7B	85.361	43.084	0.986425	1.58e-61	two	18802756	0.0594369	0.167795	-0.108358	0.0510045	-2.12449	0.0917751	0.0983038	0.0336296	0.342897	70881205	promoter-TSS (ENSSSCT00000032900)	-21	ENSSSCT00000032692		cytochrome c oxidase subunit 7b
chrX	7666859	7666860	0.75	1	0.8	1	0.4333	0.8824	ENSSSCG00000012110	-0.77557	0.0416116	MID1	0.946624	0.619426	0.61186	0.000225177	two	18584641	0.0696011	0.845171	-0.77557	0.0416116	-18.6383	0.0746312	0.113065	0	0	7666860	promoter-TSS (ENSSSCT00000036668)	-973	ENSSSCT00000036668	MID1	midline 1
chrX	7666873	7666874	0.4545	1	0.5714	1	0.4655	0.7647	ENSSSCG00000012110	-0.77557	0.0760887	MID1	0.946624	0.619426	0.61186	0.000225177	two	18584642	0.0696011	0.845171	-0.77557	0.0760887	-10.193	0.102256	0.0636311	0	0	7666874	promoter-TSS (ENSSSCT00000036668)	-987	ENSSSCT00000036668	MID1	midline 1
chrX	7889319	7889320	0.9	0.4	0.9	0.9167	1	0.3636	ENSSSCG00000012110	-0.126553	0.235044	MID1	0.946624	0.619426	0.61186	0.000225177	two	18585981	0.341812	0.468365	-0.126553	0.235044	-0.538422	0.0572199	0.0604687	0.590286	0.960437	7889320	promoter-TSS (ENSSSCT00000033849)	-655	ENSSSCT00000033849	MID1	midline 1
chrX	80884689	80884690	1	1	1	0.9118	1	0.3333	ENSSSCG00000012467	-0.171485	0.0776707	KLHL4	7.88895	1.56804	2.33087	7.72e-42	two	18816849	0.0854975	0.256983	-0.171485	0.0776707	-2.20785	0.0891701	0.0543637	0.0272547	0.305185	80884690	promoter-TSS (ENSSSCT00000013634)	-147	ENSSSCT00000013634	KLHL4
chrX	80884698	80884699	1	0.9091	0.6667	0.871	0.7368	0.4545	ENSSSCG00000012467	-0.171485	0.0742694	KLHL4	7.88895	1.56804	2.33087	7.72e-42	two	18816850	0.0854975	0.256983	-0.171485	0.0742694	-2.30896	0.0852172	0.0534129	0.0209457	0.262481	80884699	promoter-TSS (ENSSSCT00000013634)	-138	ENSSSCT00000013634	KLHL4
chrX	98656392	98656393	1	1	0	0.8966	0.8571	0.8571	ENSSSCG00000012536	-0.171146	0.197489	PLP1	1201.82	342.242	1.81213	0	two	18845121	0.678134	0.84928	-0.171146	0.197489	-0.866613	0.15566	0.0557661	0.386154	0.898791	98656393	promoter-TSS (ENSSSCT00000033433)	-908	ENSSSCT00000033433	PLP1
